# Supplementary material
Source: Research Square preprint supplement (doi:10.21203/rs.3.rs-9136753/v1)
Supplement: Supplementary file 2 [file f7db8b61cef4205091e995ff.xlsx]

## Sheet: List
Supplementary Material for the manuscript: Dede et al., Streptomyces chodovensis sp. nov.: a novel candidate for plant growth-promoting actinomycete from bare soil developing on Miocene lacustrine sediment of the Sokolov Coal Basin, Czech Republic
submitted to Antonie van Leeuwenhoek
Supplementary Table 1. Results of digital DNA-DNA hybridisation and G+C content differences.
Supplementary Table 2. Average Nucleotide Identity based on BLAST (ANIb) between genomes of closely related strains.
Supplementary Table 3. Strain morphology characterisationon different growth media.
Supplementary Table 4. Results of API. Degradation or reduction of substrates by tested strains.
Supplementary Table 5. Biosynthetic gene clusters identified by antiSMASH (complete list).
Supplementary Table 6. Predicted Antibiotic Resistance Determinants and the respective mechanism of antimicrobial resistance (AMR) and mobile genetic elements (MGE). Differeneces between strains are highligthed by yellow. Venn´s diagram included.
Supplementary Table 7. COG annotation results. Venn´s diagram included.
Supplementary Table 8. Fatty acid composition. Data for strain S. geranii (JCM 32177T) was acquired previously (Li et al. 2018).
Supplementary Table 9. Prediction of plant growth promoting traits. Venn´s diagram included.
Supplementary Table 10. Raw data on absorbance at 530 nm for the calculation of IAA production. A, B represents biological replicates of each strain. Columns 1-4 represents cultivation without tryptophan, while columns 5-8 represents cultivation with tryptophan.

## Sheet: Table S1
Supplementary Table 3. Results of digital DNA-DNA hybridisation and G+C content differences.
Subject strain	Query strain (Accession No.)	dDDH (d0, in %)	C.I. (d0, in %)	dDDH (d4, in %) *	C.I. (d4, in %)	dDDH (d6, in %)	C.I. (d6, in %)	G+C content difference (in %)
BCCO 10_0861T	Streptomyces lacrimifluminis GCA 014646095.1	44.2	[40.8 - 47.6]	37.5	[35.0 - 40.0]	42.2	[39.2 - 45.2]	0.04
	Streptomyces reticuliscabiei GCA 002154675.1	42.2	[38.9 - 45.7]	36.7	[34.2 - 39.2]	40.4	[37.4 - 43.4]	0.05
	Streptomyces turgidiscabies GCA 000331005.1	41.8	[38.5 - 45.3]	36.6	[34.1 - 39.1]	40	[37.0 - 43.0]	0.18
	Streptomyces geranii GCA 002954775.1	40	[36.6 - 43.4]	34.7	[32.2 - 37.2]	38	[35.0 - 41.0]	0.46
	Streptomyces resistomycificus GCA 001514265.1	30.7	[27.4 - 34.3]	26.3	[24.0 - 28.8]	28.6	[25.7 - 31.8]	0.99
	Streptomyces mirabilis GCA 026340005.1	25.6	[22.3 - 29.2]	26	[23.7 - 28.5]	24.5	[21.6 - 27.6]	0.04
	Streptomyces canus GCA 001514145.1	29.9	[26.6 - 33.5]	25.9	[23.6 - 28.4]	27.9	[25.0 - 31.0]	0.19
	Streptomyces lincolnensis GCA 003344445.1	32	[28.6 - 35.6]	25.8	[23.5 - 28.3]	29.5	[26.6 - 32.6]	1.01
	Streptomyces cahuitamycinicus GCA 002891435.1	25.9	[22.5 - 29.5]	25.7	[23.3 - 28.2]	24.7	[21.8 - 27.8]	0.78
	Streptomyces umbrinus GCA 014656275.1	28.5	[25.1 - 32.1]	25.7	[23.4 - 28.2]	26.7	[23.9 - 29.9]	0.31
	Streptomyces aquilus GCA 003955715.1	29.7	[26.3 - 33.3]	25.7	[23.3 - 28.2]	27.7	[24.8 - 30.8]	0.8
	Streptomyces justiciae GCA 024508375.2	29.4	[26.0 - 33.0]	25.6	[23.3 - 28.1]	27.5	[24.5 - 30.6]	0.69
	Streptomyces humidus GCA 014649655.1	24	[20.7 - 27.6]	25.4	[23.1 - 27.9]	23.1	[20.2 - 26.2]	1.68
	Streptomyces fructofermentans GCA 014651055.1	24.3	[21.0 - 28.0]	25.2	[22.9 - 27.7]	23.4	[20.5 - 26.5]	2.35
	Streptomyces asoensis GCA 016860545.1	27.3	[23.9 - 30.9]	24.8	[22.5 - 27.3]	25.7	[22.8 - 28.8]	2.26
	Streptomyces cinereoruber GCA 009299385.1	18.2	[15.1 - 21.8]	23.1	[20.8 - 25.5]	18	[15.4 - 21.0]	2.84
	Streptomyces nashvillensis GCA 014650095.1	18.5	[15.4 - 22.0]	22.6	[20.3 - 25.0]	18.2	[15.5 - 21.2]	2.23
	Streptomyces xantholiticus GCA 014651015.1	18	[14.9 - 21.5]	22.5	[20.2 - 24.9]	17.8	[15.1 - 20.7]	0.45
	Thermobispora bispora GCA 000092645.1	13.1	[10.3 - 16.4]	19.1	[16.9 - 21.5]	13.4	[11.0 - 16.2]	2.38

## Sheet: Table S2
Supplementary Table 4. Average Nucleotide Identity based on BLAST (ANIb) between genomes of closely related strains.
	BCCO 10_0861T	S. aquilus GCA 003955715.1	S. asoensis GCA 016860545.1	S. canus GCA 001514145.1	S. cinereoruber GCA 009299385.1	S. fructofermentans GCA 014651055.1	S. galilaeus GCA 008704575.1	S. geranii GCA 002954775.1	S. humidus GCA 014649655.1	S. justiciae GCA 024508375.2 A	S. lacrimifluminis GCA 014646095.1	S. lincolnensis GCA 003344445.1	S. mirabilis GCA 026340005.	S. nashvillensis GCA 014650095.1	S. resistomycificus GCA 001514265.1	S. reticuliscabiei GCA 002154675.1	S. turgidiscabies GCA 000331005.1	S. umbrinus GCA 014656275.1	S. xantholiticus GCA 014651015.1
BCCO 10_0861T	*	80.95	80.04	81.55	76.28	79.86	80.40	86.26	79.80	80.93	87.57	81.39	80.87	76.21	81.52	87.25	87.29	81.12	76.12
		(49.94)	(44.41)	(52.26)	(31.06)	(41.53)	(44.42)	(56.60)	(42.37)	(49.99)	(56.63)	(49.94)	(48.18)	(33.78)	(48.64)	(57.32)	(58.76)	(48.59)	(32.45)
S. aquilus GCA 003955715.1	80.89	*	81.20	83.34	76.69	79.80	81.39	80.62	81.02	92.81	80.73	83.03	80.78	76.72	82.74	80.65	80.72	80.50	76.41
	(50.85)		(49.65)	(58.45)	(34.37)	(45.09)	(48.78)	(47.53)	(46.28)	(73.48)	(47.87)	(55.28)	(51.07)	(38.53)	(53.00)	(48.34)	(49.66)	(50.28)	(34.92)
S. asoensis GCA 016860545.1	80.72	82.02	*	82.09	77.34	80.33	83.62	80.33	85.70	82.22	80.69	81.97	80.88	77.31	82.42	80.63	80.73	80.47	76.76
	(50.78)	(54.65)		(54.46)	(37.53)	(47.79)	(54.35)	(48.25)	(56.24)	(54.39)	(50.01)	(52.03)	(52.66)	(40.56)	(53.06)	(50.34)	(51.60)	(50.49)	(38.19)
S. canus GCA 001514145.1	80.66	82.52	80.59	*	75.72	78.64	80.68	79.87	80.40	82.57	79.95	83.20	80.02	75.72	82.89	80.51	80.25	79.99	75.65
	(51.02)	(54.87)	(45.98)		(32.00)	(41.68)	(45.46)	(45.99)	(43.91)	(54.59)	(45.30)	(54.64)	(49.15)	(35.29)	(52.54)	(48.57)	(48.41)	(48.51)	(32.93)
S. cinereoruber GCA 009299385.1	77.46	77.94	77.92	77.49	*	78.11	78.06	77.18	77.84	77.95	77.44	77.73	78.00	86.87	77.83	77.41	77.41	77.78	79.03
	(38.42)	(41.18)	(40.34)	(40.68)		(39.73)	(39.30)	(35.80)	(37.91)	(40.79)	(37.93)	(40.29)	(40.62)	(55.71)	(40.89)	(37.53)	(38.24)	(40.10)	(42.27)
S. fructofermentans GCA 014651055.1	80.49	80.55	80.28	80.19	77.63	*	80.45	80.13	79.76	80.45	80.50	80.57	81.61	77.64	80.81	80.24	80.28	84.76	77.36
	(47.45)	(50.35)	(47.86)	(49.04)	(36.95)		(46.87)	(44.25)	(43.81)	(51.24)	(46.27)	(48.52)	(51.25)	(39.70)	(48.44)	(45.54)	(46.71)	(56.54)	(37.87)
S. galilaeus GCA 008704575.1	81.44	82.66	84.07	82.62	77.66	80.58	*	80.86	83.71	82.62	81.16	82.85	81.26	77.64	83.06	81.15	81.23	81.04	77.21
	(56.73)	(60.72)	(61.06)	(60.22)	(41.30)	(52.45)		(51.72)	(56.42)	(60.65)	(54.23)	(60.40)	(57.34)	(43.84)	(59.76)	(53.07)	(54.61)	(55.19)	(42.49)
S. geranii GCA 002954775.1	86.12	80.60	79.56	80.51	75.82	79.41	79.65	*	79.10	80.70	86.21	80.51	80.20	75.68	80.48	86.47	86.53	80.15	75.58
	(59.17)	(48.38)	(43.98)	(49.08)	(30.41)	(40.00)	(42.31)		(40.75)	(48.94)	(54.96)	(47.53)	(46.77)	(33.04)	(46.09)	(59.16)	(60.44)	(47.84)	(31.10)
S. humidus GCA 014649655.1	79.95	81.23	84.73	81.17	76.42	79.24	82.67	79.28	*	81.00	79.85	80.99	79.91	76.31	81.33	79.58	79.77	79.18	76.16
	(45.30)	(48.39)	(53.33)	(49.05)	(34.52)	(41.00)	(47.00)	(42.68)		(47.57)	(45.84)	(46.36)	(46.95)	(37.27)	(47.28)	(45.38)	(46.54)	(45.22)	(35.53)
S. justiciae GCA 024508375.2	80.63	92.53	81.06	82.89	76.37	79.38	81.18	80.45	80.61	*	80.55	82.66	80.39	76.44	82.46	80.43	80.47	80.28	76.13
	(50.70)	(72.82)	(48.66)	(57.92)	(33.55)	(45.31)	(48.07)	(47.82)	(44.77)		(47.42)	(55.51)	(50.47)	(37.26)	(53.82)	(47.93)	(49.13)	(50.75)	(34.51)
S. lacrimifluminis GCA 014646095.1	88.23	81.49	80.36	81.33	76.56	80.39	80.65	87.00	80.37	81.48	*	81.31	81.07	76.38	81.57	89.18	89.25	81.09	76.42
	(65.04)	(53.49)	(50.27)	(53.13)	(35.15)	(46.54)	(48.78)	(60.82)	(48.13)	(53.00)		(52.67)	(52.03)	(37.66)	(53.03)	(64.51)	(66.39)	(52.61)	(36.39)
S. lincolnensis GCA 003344445.1	81.52	83.33	81.35	84.29	76.70	79.84	81.94	80.70	81.07	83.31	81.01	*	80.75	76.65	84.70	81.00	81.07	80.92	76.47
	(55.13)	(59.40)	(50.40)	(62.22)	(35.83)	(46.62)	(51.60)	(50.52)	(47.16)	(59.68)	(50.52)		(52.67)	(38.77)	(59.70)	(51.06)	(52.33)	(54.12)	(37.24)
S. mirabilis GCA 026340005.1	80.09	79.99	79.52	79.94	76.14	80.00	79.58	79.69	79.17	79.91	79.90	79.87	*	76.31	80.29	79.89	79.89	81.25	76.13
	(42.83)	(44.34)	(40.95)	(45.67)	(29.22)	(39.90)	(39.69)	(40.00)	(39.24)	(44.22)	(39.98)	(42.67)		(32.72)	(41.45)	(41.15)	(42.65)	(44.86)	(30.31)
S. nashvillensis GCA 014650095.1	76.75	77.38	77.41	77.05	86.17	77.62	77.46	76.39	77.10	77.36	76.74	77.25	77.53	*	77.30	76.64	76.66	77.40	78.53
	(38.43)	(42.32)	(39.80)	(41.18)	(51.77)	(39.25)	(38.50)	(36.16)	(37.95)	(42.02)	(36.91)	(39.92)	(41.99)		(39.97)	(37.25)	(38.00)	(40.58)	(40.98)
S. resistomycificus GCA 001514265.1	81.77	83.06	82.03	83.94	76.89	80.31	82.17	80.93	81.74	83.17	81.32	84.82	81.35	76.94	*	81.34	81.39	81.10	76.88
	(55.13)	(58.80)	(53.10)	(61.95)	(37.60)	(48.57)	(53.03)	(49.95)	(49.21)	(60.04)	(52.50)	(61.60)	(53.45)	(40.10)		(52.08)	(53.45)	(53.10)	(38.94)
S. reticuliscabiei GCA 002154675.1	87.33	80.73	79.91	81.32	76.30	79.51	80.01	86.66	79.62	80.71	88.55	80.77	80.70	75.92	81.00	*	99.77	80.43	75.87
	(62.87)	(51.19)	(47.91)	(54.45)	(32.68)	(43.71)	(45.52)	(62.21)	(45.40)	(51.46)	(61.28)	(50.71)	(50.43)	(35.81)	(50.30)		(93.06)	(50.04)	(34.58)
S. turgidiscabies GCA 000331005.1	87.12	80.76	79.97	80.96	76.27	79.58	80.13	86.48	79.73	80.73	88.52	80.94	80.65	76.11	81.05	99.52	*	80.40	75.95
	(60.06)	(49.40)	(45.89)	(50.63)	(31.57)	(41.45)	(43.54)	(59.31)	(43.63)	(49.34)	(58.50)	(48.14)	(48.75)	(34.12)	(48.08)	(86.45)		(47.93)	(33.15)
S. umbrinus GCA 014656275.1	80.55	80.03	79.12	80.20	76.07	83.33	79.38	79.72	78.79	80.04	80.08	80.22	81.64	76.17	80.05	79.86	79.89	*	75.98
	(49.52)	(50.53)	(45.71)	(51.04)	(33.57)	(50.87)	(44.45)	(47.39)	(42.29)	(51.53)	(47.13)	(50.61)	(52.04)	(37.13)	(48.52)	(47.01)	(48.43)		(34.76)
S. xantholiticus GCA 014651015.1	76.67	76.95	76.82	76.75	78.30	77.45	76.87	76.14	76.61	77.01	76.58	76.79	77.19	78.36	77.08	76.40	76.39	77.12	*
	(42.32)	(44.46)	(42.96)	(44.10)	(44.07)	(42.23)	(43.09)	(39.46)	(41.63)	(44.02)	(41.68)	(44.17)	(44.35)	(46.98)	(44.81)	(41.43)	(42.41)	(43.78)

## Sheet: Table S3
Supplementary Table 1. Strain morphology characterisationon different growth media.
growth medium	characteristics	BCCO 10_0861T (=DSM 117345T)	Streptomyces lacrimifluminis DSM 111125T	Streptomyces reticuliscabei DSM 41804T	Streptomyces turgidiscabies DSM 41838T
ISP2	growth	+++	+++	+++	++
	aerial mycelium development	++	+	++	-
	soluble pigment	pink	-	-	-
ISP3	growth	+++	+++	+++	+++
	aerial mycelium development	-	++	+++	+++
	soluble pigment	pink	-	-	pink
ISP4	growth	+++	+++	+++	+++
	aerial mycelium development	++	++	+++	+++
	soluble pigment	(+/-) pink	-	pink	pink
ISP6	growth	+++	+++	+++	+++
	aerial mycelium development	-	-	-	-
	soluble pigment	-	-	-	-
Nutrient agar	growth	++	+++	+++	++
	aerial mycelium development	-	-	-	-
	soluble pigment	pink	-	-	-

## Sheet: Table S4
Supplementary Table 2. Results of API. Degradation or reduction of substrates by teted strains.
Degredation/reduction:
API ZYM	BCCO 10_0861T (DSM 117345T)	Streptomyces lacrimifluminis (DSM 111125T)	Streptomyces reticuliscabei (DSM 41804T)	Streptomyces turgidiscabies (DSM 41838T)		API 20 NE	BCCO 10_0861T (DSM 117345T)			Streptomyces lacrimifluminis (DSM 111125T)			Streptomyces reticuliscabei (DSM 41804T)			Streptomyces turgidiscabies (DSM 41838T)				API 50CH		BCCO 10_0861T (DSM 117345T)			Streptomyces lacrimifluminis (DSM 111125T)			Streptomyces reticuliscabei (DSM 41804T)			Streptomyces turgidiscabies (DSM 41838T)
	API profiles						1st day	2nd day	4th day	1st day	2nd day	4th day	1st day	2nd day	4th day	1st day	2nd day	4th day				1st trial	2nd trial	Total	1st trial	2nd trial	Total	1st trial	2nd trial	Total	1st trial	2nd trial	Total
1- Control	0	0	0	0		NO3 reduction	+	+	+	-	-	-	+	+	+	+	+	+		0		-	-	-	-	-	-	-	-	-	-	-	-
2- Alkaline phosphatase	+	+	+	+		N2	-	-	-	-	-	-	-	-	-	-	-	-		1	GLY	+	+	+	+	+	+	+	+	+	+	+	+
3- Esterase (C4)	+	+	+	+		TRP	-	-	-	-	-	-	-	-	-	-	-	-		2	ERY	-	-	-	-	-	-	-	-	-	-	-	-
4- Esterase lipase (C8)	+	+	+	+		GLU	-	-	-	-	-	-	-	-	-	-	-	-		3	DARA	-	-	(+)	+	+	+	-	(+)	+	-	(+)	+
5- Lipase (C14)	W	W	W	W		ADH	-	-	-	-	-	-	-	-	-	-	-	-		4	LARA	+	+	+	+	+	+	+	+	+	+	+	+
6 - Leucine aryamidase	+	+	+	+		URE	-	-	-	-	-	+	+	+	+	-	-	-		5	RIB	+	+	+	+	+	+	+	+	+	+	+	+
7- Valine aryamidase	+	+	+	+		ESC	+	+	+	+	+	+	+	+	+	+	+	+		6	DXYL	(+)	+	+	(+)	(+)	+	+	+	+	(+)	+	+
8- Cystine aryamidase	+	+	+	+		GEL	(+)	+	+	+	+	+	+	+	+	+	+	+		7	LXYL	-	-	-	-	-	-	-	-	-	-	-	-
9- Trypsine	+	+	+	+		PNG	-	+	+	+	+	+	+	+	+	+	+	+		8	ADO	-	-	-	-	-	-	-	-	-	-	-	-
10- α-Chymotrypsine	W	W	+	W		GLU	+	+	+	+	+	+	+	+	+	+	+	+		9	MDX	-	-	-	-	-	-	-	-	-	-	-	-
11- Acid phosphatase	+	+	+	+		ARA	+	+	+	+	+	+	+	+	+	(+)	+	+		10	GAL	(+)	(+)	+	-	-	(+)	+	+	+	-	(+)	+
12- Naphtol-AS-BI-phoshohydrolase	+	+	+	+		MNE	+	+	+	+	+	+	+	+	+	-	(+)	+		11	GLU	+	+	+	+	+	+	+	+	+	+	+	+
13- α-Galactosidase	+	+	+	+		MAN	+	+	+	-	+	+	(+)	+	+	-	-	+		12	FRU	+	+	+	+	+	+	+	+	+	+	+	+
14- β-Galactosidase	+	+	+	+		NAG	+	+	+	+	+	+	+	+	+	+	+	+		13	MNE	(+)	+	+	(+)	+	+	+	+	+	+	+	+
15- β-Glucuronidase	W	W	+	+		MAL	+	+	+	+	+	+	-	-	+	(+)	(+)	+		14	SBE	-	-	-	-			-	-	-	-	-	-
16- α-Glucosidase	+	+	+	+		GNT	+	+	+	+	+	+	+	+	+	-	+	+		15	RHA	+	+	+	+	+	+	+	+	+	+	+	+
17- β-Glucosidase	+	+	+	+		CAP	-	-	-	-	-	-	-	-	-	-	-	-		16	DUL	-	-	-	-			-	-	-	-	-	-
18- N-Acetyl-β-glucosaminidase	+	+	+	+		ADI	(+)	(+)	+	(+)	-	+	-	-	-	-	-	-		17	INO	+	+	+	+	+	+	+	+	+	(+)	+	+
19- α-Mannosidase	W	+	+	+		MLT	-	+	+	+	+	+	-	+	+	(+)	(+)	+		18	MAN	+	+	+	+	+	+	+	+	+	(+)	+	+
20- α-Fucosidase	W	+	W	W		CIT	(+)	(+)	+	(+)	+	+	-	(+)	+	-	-	-		19	SOR	-	-	-	-	-	-	-	-	-	-	-	-
						PAC	-	-	-				-	-	-	-	-	-		20	MDM	-	-	-	-	-	-	-	-	-	-	-	-
W	W	weak				OX														21	MDG	-	-	-	-	-	-	-	-	(+)	-	-	-
+	+	positive																		22	NAG	+	+	+	+	+	+	+	+	+	+	+	+
0	0	negative						(+)	weak positive											23	AMY	-	-	(+)	-	-	-	-	-	-	-	-	-
								+	positive											24	ARB	-	(+)		-	-	(+)	-	-	(+)	-	(+)	+
								-	negative											25	ESC	V1	V1	V1	V2	V2	V2	V3	V3	V3	V4	V4	V4
								nt	no tested											26	SAL	-	-	+	-	-	(+)	-	-	-	-	-	-
																				27	CEL	+	+	+	+	+	+	+	+	+	+	+	+
																				28	MAL	-	-		-	-	-	-	-	-	-	-	+
																				29	LAC	+	+	+	(+)	(+)	+	+	+	+	-	-	+
																				30	MEL	+	+	+	+	+	+	(+)	(+)	+	+	+	+
																				31	SAC	+	+	+	+	+	+	+	+	+	+	+	+
																				32	TRE	-	-	-	-	-	-	-	-	+	-	-	-
																				33	INU	+	+	+	(+)	+	+	+	+	+	+	+	+
																				34	MLZ	-	-	-	-	-	-	-	-	-	-	-	-
																				35	RAF	+	+	+	-	-	-	+	+	+	+	+	+
																				36	AMD	+	+	+	+	+	+	+	+	+	+	+	+
																				37	GLYG	+	+	+	+	+	+	+	+	+	+	+	+
																				38	XLT	-	-	-	-	-	-	-	-	-	-	-	-
																				39	GEN	-	(+)		-	-	(+)	-	-	-	-	-	-
																				40	TUR	-	-	-	-	-	-	-	-	-	-	-	-
																				41	LYX	-	-	-	-	-	-	-	-	-	-	-	-
																				42	TAG	-	-	-	-	-	-	-	-	-	-	-	-
																				43	DFUC	-	-	-	-	-	-	-	-	-	-	-	-
																				44	LFUC	+	+	+	+	+	+	+	+	+	+	+	+
																				45	DARL	+	+	+	+	+	+	+	+	+	(+)	+	+
																				46	LARL	-	-	-	-	-	-	-	-	-	-	-	-
																				47	GNT	+	+	+	+	+	+	+	+	+	+	+	+
																				48	2KG	-	-	-	-	-	-	(+)	(+)	+	-	-	(+)
																				49	5KG	+	+	+	-	-	-	+	+	+	+	+	+
																					(+)	weak positive
																					+	positive
																					-	negative
																					nt	no tested

## Sheet: Table S5
Supplementary Table 5. Biosynthetic gene clusters identified by antiSMASH (complete list).
	Region	Type	From	To	Most similar known cluster	Secondary metobolite function	Similarity
BCCO 10_0861T (DSM 12574T)	Region 1.1	betalactone	64.794	91.922	BD-12	NRP	0.17
	Region 1.2	NI-siderophore	526.601	555.839	kinamycin	Polyketide	0.13
	Region 1.3	hydrogen-cyanide	822.51	835.53	aborycin	RiPP	0.21
	Region 1.4	phenazine	859.137	879.646	lomofungin	Other	0.39
	Region 1.7	butyrolactone,terpene	1,014,933	1,038,850	γ-butyrolactone	Other	1
	Region 1.8	NAPAA	1,063,851	1,097,724	stenothricin	NRP:Cyclic depsipeptide	0.13
	Region 2.2	NI-siderophore,lanthipeptide-class-iii,RiPP-like	164.46	223.837	informatipeptin	RiPP:Lanthipeptide	1
	Region 2.3	bottromycin,thiopeptide	337.428	360.915	bottromycin A2	RiPP:Bottromycin	0.36
	Region 2.4	arylpolyene	522.333	563.469	triacsin C	Other	0.65
	Region 2.5	NRP-metallophore,NRPS	594.141	659.452	scabichelin	NRP	1
	Region 2.6	terpene	730.941	757.588	hopene	Terpene	0.84
	Region 4.1	lassopeptide	134.848	157.356	humidimycin	RiPP	0.92
	Region 4.2	T1PKS,hglE-KS	158.49	207.232	hexacosalactone A	Other	0.13
	Region 4.3	terpene	287.617	308.63	albaflavenone	Terpene	1
	Region 4.4	T1PKS	1,720,154	1,764,353	quinolidomicin A	Polyketide	0.22
	Region 4.5	melanin	3,833,722	3,844,198	istamycin	Saccharide	0.04
	Region 4.7	NRPS-like	4,114,243	4,155,862	inthomycin B	Polyketide	0.54
	Region 6.1	aminopolycarboxylic-acid	139.506	152.738	EDHA	Other	0.88
	Region 11.1	ectoine	85.43	95.939	ectoine	Other	1
	Region 11.3	T2PKS,butyrolactone	861.191	933.718	spore pigment	Polyketide	0.83
	Region 11.4	transAT-PKS-like,NRPS	1,010,573	1,058,779	oxalomycin B	NRP+Polyketide	0.12
	Region 11.5	T1PKS	1,070,870	1,113,218	chartreusin	Polyketide	0.23
	Region 11.7	linaridin	1,240,330	1,260,776	pentostatine/vidarabine	Other	0.06
	Region 11.8	NRPS,NRPS-like	1,495,392	1,591,982	diisonitrile antibiotic SF2768	NRP	0.66
Streptomyces lacrimifluminis (DSM 111125T)	Region 2.1	lanthipeptide-class-iii,RiPP-like	5.18	32.76	informatipeptin	RiPP:Lanthipeptide	1
	Region 2.2	T2PKS,NRP-metallophore,NRPS	233.239	339.413	alnumycin A/alnumycin B/alnumycin C/alnumycin P/prealnumycin/thalnumycin A/thalnumycin B/K1115A/1,6-dihydro-8-propylanthraquinone	Polyketide:Type II polyketide	0.37
	Region 2.3	terpene	371.623	398.27	hopene	Terpene	0.92
	Region 3.2	NAPAA	348.641	382.516	ε-Poly-L-lysine	NRP	1
	Region 5.1	terpene	41.715	62.671	albaflavenone	Terpene	1
	Region 6.1	terpene,butyrolactone	23.101	45.254	γ-butyrolactone	Other	1
	Region 6.2	NAPAA	71.32	106.265	stenothricin	NRP:Cyclic depsipeptide	0.13
	Region 6.3	NI-siderophore	220.381	251.567	meilingmycin	Polyketide	0.02
	Region 7.1	NI-siderophore	44.227	74.236	kinamycin	Polyketide	0.16
	Region 7.2	hydrogen-cyanide,NRPS	200.373	248.104	diisonitrile antibiotic SF2768	NRP	0.66
	Region 8.1	NI-siderophore	254.505	278.273	desferrioxamin B/desferrioxamine E	Other	1
	Region 11.1	T1PKS,butyrolactone,other	210.018	255.579	tetronasin	Polyketide	0.03
	Region 15.1	T3PKS	1	28.477	alkylresorcinol	Polyketide	1
	Region 15.2	T1PKS	48.161	109.368	nystatin A1	Polyketide:Modular type I polyketide+Saccharide:Hybrid/tailoring saccharide	0.31
	Region 17.1	hglE-KS,T1PKS	11.981	65.095	hexacosalactone A	Other	0.13
	Region 18.1	T1PKS	91.987	135.976	chartreusin	Polyketide	0.3
	Region 20.1	ectoine	86.168	96.59	ectoine	Other	1
	Region 27.1	PKS-like,LAP,butyrolactone	58.548	99.757	granaticin	Polyketide:Type II polyketide	0.1
	Region 34.1	melanin	8.024	18.428	istamycin	Saccharide	0.04
	Region 35.1	T2PKS	6.552	71.861	spore pigment	Polyketide	0.83
	Region 36.1	NRPS,T1PKS	23.579	66.795	rustmicin	Polyketide:Iterative type I polyketide	0.1
	Region 37.1	T1PKS,butyrolactone	1	34.408	4-hexadecanoyl-3-hydroxy-2-(hydroxymethyl)-2H-furan-5-one	Polyketide	0.36
	Region 38.1	NRPS-like	30.344	64.642	cremimycin	Polyketide	0.05
	Region 46.1	arylpolyene,NRPS	1	36.289	kitacinnamycin A/kitacinnamycin B/kitacinnamycin C/kitacinnamycin D/kitacinnamycin E/kitacinnamycin F	NRP	0.28
	Region 48.1	terpene	1	18.09	avermitilol	Terpene	1
	Region 60.1	T3PKS	1	21.356	alkylresorcinol	Polyketide	0.66
	Region 66.1	T1PKS	1	13.161	streptolydigin	NRP+Polyketide:Modular type I polyketide+Saccharide:Hybrid/tailoring saccharide	0.21
	Region 67.1	NRPS	1	12.127	tirandamycin	NRP+Polyketide:Modular type I polyketide	0.53
	Region 75.1	T1PKS	1	8.16	J1-001-2	Polyketide	0.34
	Region 83.1	T1PKS	1	5.136	tetrafibricin	Polyketide+Other	1
Streptomyces reticuliscabei (DSM 41804T)	Region 5.1	ectoine	13.83	24.288	ectoine	Other	0.75
	Region 61.1	hglE-KS,terpene	22.371	45.233	2-methylisoborneol	Terpene	1
	Region 72.1	ectoine	3.321	13.743	ectoine	Other	1
	Region 93.1	terpene	2.289	22.762	diastaphenazine/izumiphenazine C	Other	0.1
	Region 101.1	terpene	17.399	38.52	albaflavenone	Terpene	1
	Region 111.1	RiPP-like,lanthipeptide-class-iii,NI-siderophore	7.503	45.118	informatipeptin	RiPP:Lanthipeptide	1
	Region 131.1	T2PKS	1	26.953	fredericamycin A	Polyketide:Type II polyketide	0.81
	Region 144.1	NRPS,HR-T2PKS	1	43.98	colibrimycin	NRP+Other	0.13
	Region 147.1	NRPS	1	16.964	diisonitrile antibiotic SF2768	NRP	0.61
	Region 154.1	NRP-metallophore,NRPS	1	41.62	scabichelin	NRP	0.9
	Region 162.1	terpene,butyrolactone	11.482	24.403	γ-butyrolactone	Other	1
	Region 174.1	NI-siderophore	1	17.015	peucechelin	NRP	0.25
	Region 193.1	T1PKS,NRPS,NRPS-like	2.684	62.263	rustmicin	Polyketide:Iterative type I polyketide	0.13
	Region 238.1	hglE-KS	1	15.62	rabelomycin/dehydrorabelomycin/fluostatin F/fluostatin G/fluostatin H	Polyketide:Type II polyketide	0.03
	Region 279.1	T2PKS	1	15.432	spore pigment	Polyketide	0.75
	Region 302.1	T3PKS	1	19.321	viguiepinol	Polyketide	0.53
	Region 311.1	redox-cofactor	1	14.179	cinnamycin	RiPP:Lanthipeptide	0.09
	Region 339.1	hglE-KS	1.448	31.394	diisonitrile antibiotic SF2768	NRP	0.16
	Region 347.1	NRPS	1	20.088	desulfoclethramycin/clethramycin	Other	0.16
	Region 363.1	T1PKS,NRPS-like	4.054	49.507	lagunapyrone A/lagunapyrone B/lagunapyrone C	Polyketide	0.22
	Region 365.1	NRPS-like	1	12.145	minimycin	NRP+Saccharide	1
	Region 396.1	NI-siderophore	1	20.059	desferrioxamin B/desferrioxamine E	Other	0.83
	Region 400.1	hydrogen-cyanide	55.354	68.248	aborycin	RiPP	0.21
	Region 420.1	T1PKS	5.5	47.802	chlorothricin/deschlorothricin	Polyketide:Modular type I polyketide+Polyketide:Iterative type I polyketide+Saccharide:Oligosaccharide	0.04
	Region 450.1	NI-siderophore	1	11.201	kinamycin	Polyketide	0.05
	Region 528.1	T1PKS	1	21.797	camporidine A/camporidine B	Alkaloid+Polyketide	0.5
	Region 538.1	terpene	1	20.623	formicamycins A-M	Polyketide	0.11
	Region 602.1	NAPAA	39.912	74.803	stenothricin	NRP:Cyclic depsipeptide	0.13
	Region 661.1	NAPAA	1	20.034	ε-Poly-L-lysine	NRP	1
	Region 706.1	terpene	25.161	50.769	hopene	Terpene	0.92
	Region 730.1	NRPS,NRPS-like	1	48.183	cysteoamide	NRP	0.63
Streptomyces turgidiscabies (DSM 41838T)	Region 18.1	NI-siderophore	1	25.067	paulomycin	Other	0.09
	Region 21.1	NI-siderophore	1	19.946	peucechelin	NRP	0.35
	Region 41.1	ectoine	20.561	27.921	ectoine	Other	0.75
	Region 65.1	T1PKS	1	29.835	argimycin PI/argimycin PII/nigrifactin/argimycin PIV/argimycin PV/argimycin PVI/argimycin PIX	Polyketide:Modular type I polyketide	0.16
	Region 68.1	T2PKS	1	11.464	A-74528	Polyketide	0.55
	Region 77.1	HR-T2PKS	1	11.409	colibrimycin	NRP+Other	0.11
	Region 94.1	T1PKS,NRPS-like	1	45.008	lagunapyrone A/lagunapyrone B/lagunapyrone C	Polyketide	0.22
	Region 119.1	NRPS-like	1	18.398	minimycin	NRP+Saccharide	1
	Region 120.1	ectoine	31.859	42.281	ectoine	Other	1
	Region 191.1	NRPS	59.774	104.207	diisonitrile antibiotic SF2768	NRP	0.66
	Region 206.1	NI-siderophore	27.569	53.129	desferrioxamin B/desferrioxamine E	Other	1
	Region 235.1	NAPAA	2.045	35.92	ε-Poly-L-lysine	NRP	1
	Region 269.1	terpene	1	16.965	hopene	Terpene	0.92
	Region 276.1	terpene	1	22.158	formicamycins A-M	Polyketide	0.11
	Region 300.1	RiPP-like	3.127	13.345	informatipeptin	RiPP:Lanthipeptide	0.28
	Region 307.1	terpene	1	11.653	albaflavenone	Terpene	1
	Region 316.1	hglE-KS,terpene	18.093	69.584	2-methylisoborneol	Terpene	1
	Region 320.1	NRPS	1	28.704	omnipeptin	NRP:Cyclic depsipeptide	0.23
	Region 321.1	melanin	1	2.796	melanin	Other	1
	Region 332.1	terpene	3.31	24.116	diastaphenazine/izumiphenazine C	Other	0.1
	Region 334.2	NRPS	415.368	464.24	thaxtomin A	NRP	0.81
	Region 376.1	redox-cofactor	1	17.42	cinnamycin	RiPP:Lanthipeptide	0.09
	Region 405.1	T1PKS	1	6.344	hexacosalactone A	Other	0.04
	Region 416.1	T2PKS	1	5.162	spore pigment	Polyketide	0.58
	Region 448.1	NRP-metallophore,NRPS	1	51.086	scabichelin	NRP	1
	Region 450.1	lanthipeptide-class-iii	1	9.159	informatipeptin	RiPP:Lanthipeptide	0.28
	Region 457.1	hydrogen-cyanide	11.469	24.363	aborycin	RiPP	0.21
	Region 470.1	terpene,butyrolactone	1	20.315	γ-butyrolactone	Other	1
	Region 496.1	T1PKS	1	18.842	chlorothricin/deschlorothricin	Polyketide:Modular type I polyketide+Polyketide:Iterative type I polyketide+Saccharide:Oligosaccharide	0.04
	Region 592.1	NRPS,NRPS-like	1	58.939	cysteoamide	NRP	0.63
	Region 607.1	T1PKS,NRPS,NRPS-like	16.953	71.962	misaugamycin A/misaugamycin B	NRP	0.07
Streptomyces geranii (JCM 32177T)	Region 1.1	phenazine,T1PKS	113.112	247.465	tripartilactam/niizalactam C	Polyketide	0.64
	Region 1.2	NRP-metallophore,NRPS	354.738	427.321	amychelin A/amychelin B	NRP	0.27
	Region 1.3	NRPS	474.188	518.639	diisonitrile antibiotic SF2768	NRP	0.61
	Region 2.1	hydrogen-cyanide	165.432	178.419	aborycin	RiPP	0.21
	Region 2.3	butyrolactone,terpene	322.187	346.166	γ-butyrolactone	Other	1
	Region 2.4	NAPAA	375.98	410.91	stenothricin	NRP:Cyclic depsipeptide	0.13
	Region 3.1	hglE-KS	10.596	65.026	A33853	Other	0.08
	Region 3.2	NRPS-like,NRPS	269.52	339.243	rotihibin A	NRP	1
	Region 4.1	T1PKS	315.435	359.403	chlorothricin/deschlorothricin	Polyketide:Modular type I polyketide+Polyketide:Iterative type I polyketide+Saccharide:Oligosaccharide	0.04
	Region 5.1	terpene	345.237	371.889	hopene	Terpene	0.92
	Region 6.1	NI-siderophore	79.967	111.137	paulomycin	Other	0.13
	Region 6.2	linaridin	202.169	222.834	pentostatine/vidarabine	Other	0.09
	Region 9.1	hglE-KS,other,T1PKS	1	96.74	hexacosalactone A	Other	0.13
	Region 10.1	butyrolactone	64.116	75.258	prejadomycin/rabelomycin/gaudimycin C/gaudimycin D/UWM6/gaudimycin A	Polyketide:Type II polyketide+Saccharide:Hybrid/tailoring saccharide	0.06
	Region 11.1	T1PKS,NRPS,NRPS-like,betalactone	27.778	144.788	tirandamycin	NRP+Polyketide:Modular type I polyketide	0.33
	Region 13.1	ectoine	1.335	11.706	showdomycin	Other	0.29
	Region 16.1	lanthipeptide-class-iv	38.702	61.416	streptocollin	RiPP:Lanthipeptide	1
	Region 17.2	redox-cofactor	98.335	121.112	cinnamycin	RiPP:Lanthipeptide	0.14
	Region 27.2	NI-siderophore	57.065	89.772	peucechelin	NRP	0.25
	Region 27.3	RiPP-like	93.649	103.867	informatipeptin	RiPP:Lanthipeptide	0.42
	Region 28.1	melanin	13.704	24.159	melanin	Other	0.6
	Region 28.2	terpene	33.446	54.789	ebelactone	Polyketide	0.05
	Region 29.1	T2PKS	39.031	108.217	fredericamycin A	Polyketide:Type II polyketide	0.81
	Region 31.1	NI-siderophore	44.709	74.736	kinamycin	Polyketide	0.13
	Region 44.1	NI-siderophore	1	25.653	desferrioxamin B/desferrioxamine E	Other	1
	Region 55.1	ectoine	38.482	48.904	ectoine	Other	1
	Region 62.1	T2PKS	1	45.697	spore pigment	Polyketide	0.83
	Region 64.1	terpene	6.775	27.86	albaflavenone	Terpene	1
	Region 65.1	NAPAA	21.283	42.638	ε-Poly-L-lysine	NRP	1

## Sheet: Table S6
Supplementary Table 6. Predicted Antibiotic Resistance Determinants and the respective mechanism of antimicrobial resistance (AMR) and mobile genetic elements (MGE). Differeneces between strains are highligthed by yellow. Venn´s diagram included.
AMR Mechanism/Genes	BCCO 10_0861T (DSM 117345T)	Streptomyces geranii (JCM 32177T)	Streptomyces reticuliscabei (DSM 41804T)	Streptomyces lacrimifluminis (DSM 111125T)	Streptomyces turgidiscabies (DSM 41838T)
Antibiotic activation enzyme	KatG	KatG	KatG	KatG	KatG
Antibiotic inactivation enzyme		AAC(2')-I	AAC(2')-I	AAC(2')-I	AAC(2')-I
Antibiotic target in susceptible species	Alr, Ddl, dxr, EF-G, EF-Tu, folA, Dfr, folP, gyrA, gyrB, inhA, fabI, Iso-tRNA, kasA, MurA, rho, rpoB, rpoC, S10p, S12p	Alr, Ddl, dxr, EF-G, EF-Tu, folA, Dfr, folP, gyrA, gyrB, inhA, fabI, Iso-tRNA, kasA, MurA, rho, S10p, S12p	Alr, Ddl, dxr, EF-G, EF-Tu, folA, Dfr, folP, gyrA, gyrB, inhA, fabI, Iso-tRNA, kasA, MurA, rho, rpoB, rpoC, S10p, S12p	Alr, Ddl, dxr, EF-G, EF-Tu, folA, Dfr, folP, gyrA, gyrB, inhA, fabI, Iso-tRNA, kasA, MurA, rho, rpoB, rpoC, S10p, S12p	Alr, Ddl, dxr, EF-G, EF-Tu, folA, Dfr, folP, gyrA, gyrB, inhA, fabI, Iso-tRNA, kasA, MurA, rho, rpoB, rpoC, S10p, S12p
Antibiotic target protection protein		Tet	Tet		Tet
Antibiotic target replacement protein		HtdX	HtdX	FadG-like, HtdX	HtdX
Efflux pump conferring antibiotic resistance	Otr(C)	Otr(C)	Otr(C)	Otr(C)	Otr(C)
Gene conferring resistance via absence	gidB	gidB	gidB	gidB	gidB
Protein altering cell wall charge conferring antibiotic resistance	GdpD, MprF, PgsA	GdpD, MprF, PgsA	GdpD, MprF, PgsA	GdpD, MprF, PgsA	GdpD, MprF, PgsA
Protein altering cell wall structure conferring antibiotic resistance	VanJ		VanJ	VanJ	VanJ
Regulator modulating expression of antibiotic resistance genes	LpqB, MtrA, MtrB, OxyR, VanO-type	VanO-type	LpqB, MtrA, MtrB, OxyR, VanO-type	LpqB, MtrA, MtrB, OxyR, VanO-type	LpqB, MtrA, MtrB, OxyR, VanO-type
BCCO 10_0861T (DSM 117345T)		Streptomyces geranii (JCM 32177T)		Streptomyces reticuliscabei (DSM 41804T)		Streptomyces lacrimifluminis (DSM 111125T)		Streptomyces turgidiscabies (DSM 41938T)
MGE type	Family	MGE type	Family	MGE type	Family	MGE type	Family	MGE type	Family
		Insertion sequence	ISSgr2	Insertion sequence	ISSgr2	Insertion sequence	ISMysp4	Insertion sequence	ISStac1
		Insertion sequence	ISSdi1	Insertion sequence	ISSdi1	Insertion sequence	ISBfu1	Insertion sequence	IS469
						Composite transposon	cn_4078_ISBfu1	Insertion sequence	ISSdi1
						Insertion sequence	ISSam1	Insertion sequence	ISStu2
						Insertion sequence	IS112
						Insertion sequence	ISSav6

## Sheet: Table S7
Supplementary table 7. COG annotation results. Venn´s diagram included.
Cluster	BCCO 10_0861T (DSM 117345T)	Streptomyces geranii (JCM 32177T)	Streptomyces reticuliscabei (DSM 41804T)	Streptomyces lacrimifluminis (DSM 111125T)	Streptomyces turgidiscabies (DSM 41838T)	COG	type
OG0000000	OG0000000	OG0000000	OG0000000	OG0000000	OG0000000	NA	NA
OG0000001	OG0000001	OG0000003	OG0000001	OG0000001	OG0000001	NA	NA
OG0000002	OG0000002	OG0000002	OG0000002	OG0000002	OG0000002	COG1309	Information Storage And Processing
OG0000003	OG0000003	OG0000003	OG0000003	OG0000003	OG0000003	COG0491	Poorly Characterized
OG0000004	OG0000004	OG0000004	OG0000004	OG0000004	OG0000004	COG3962	Metabolism
OG0000005	OG0000005	OG0000005	OG0000005	OG0000005	OG0000005	COG0789	Information Storage And Processing
OG0000006	OG0000006	OG0000006	OG0000006	OG0000006	OG0000006	NA	NA
OG0000007	OG0000007	OG0000007	OG0000007	OG0000007	OG0000007	COG2018	Cellular Processes And Signaling
OG0000008	OG0000008	OG0000008	OG0000008	OG0000008	OG0000008	COG0821	Metabolism
OG0000009	OG0000009	OG0000009	OG0000009	OG0000009	OG0000009	COG1804	Metabolism
OG0000010	OG0000010		OG0000010	OG0000010	OG0000010	COG1062	Metabolism
OG0000011	OG0000011	OG0000011	OG0000011	OG0000011	OG0000011	COG0021	Metabolism
OG0000012	OG0000012	OG0000012	OG0000012	OG0000012	OG0000012	COG0296	Metabolism
OG0000013	OG0000013	OG0000013	OG0000013	OG0000013	OG0000013	NA	NA
OG0000014	OG0000014	OG0000014	OG0000014	OG0000014	OG0000014	COG1278	Information Storage And Processing
OG0000015	OG0000015	OG0000015	OG0000015	OG0000015	OG0000015	COG1737	Information Storage And Processing
OG0000016	OG0000016	OG0000016	OG0000016	OG0000016	OG0000016	COG0598	Metabolism
OG0000017		OG0000017	OG0000017	OG0000017	OG0000017	NA	NA
OG0000018	OG0000018	OG0000018	OG0000018	OG0000018	OG0000018	COG2057	Metabolism
OG0000019	OG0000019	OG0000019	OG0000019	OG0000019	OG0000019	COG1788	Metabolism
OG0000020	OG0000020	OG0000020	OG0000020	OG0000020	OG0000020	COG2205	Cellular Processes And Signaling
OG0000021	OG0000021	OG0000021	OG0000021	OG0000021	OG0000021	COG0166	Metabolism
OG0000022	OG0000022	OG0000022	OG0000022	OG0000022	OG0000022	COG2080	Metabolism
OG0000023	OG0000023	OG0000023	OG0000023	OG0000023	OG0000023	COG1304	Metabolism;Poorly Characterized
OG0000024	OG0000024	OG0000024	OG0000024	OG0000024	OG0000024	COG1830	Metabolism
OG0000025	OG0000025	OG0000025	OG0000025	OG0000025	OG0000025	NA	NA
OG0000026		OG0000026	OG0000026	OG0000026	OG0000026	NA	NA
OG0000027	OG0000027	OG0000027	OG0000027	OG0000027	OG0000027	COG0366	Metabolism
OG0000028	OG0000028	OG0000028	OG0000028	OG0000028	OG0000028	COG2071	Metabolism
OG0000029	OG0000029	OG0000029	OG0000029	OG0000029	OG0000029	COG0202	Information Storage And Processing
OG0000030	OG0000030		OG0000030	OG0000030	OG0000030	COG0111	Metabolism
OG0000031	OG0000031	OG0000031	OG0000031	OG0000031	OG0000031	NA	NA
OG0000032	OG0000032	OG0000032	OG0000032	OG0000032	OG0000032	NA	NA
OG0000033	OG0000033	OG0000033	OG0000033	OG0000033	OG0000033	NA	NA
OG0000034	OG0000034	OG0000034	OG0000034	OG0000034	OG0000034	COG1975	Cellular Processes And Signaling
OG0000035	OG0000035	OG0000035	OG0000035	OG0000035	OG0000035	COG1396	Information Storage And Processing
OG0000036	OG0000036	OG0000036	OG0000036	OG0000036	OG0000036	NA	NA
OG0000037	OG0000037	OG0000037	OG0000037	OG0000037	OG0000037	COG1609	Information Storage And Processing
OG0000038	OG0000038	OG0000038	OG0000038	OG0000038	OG0000038	NA	NA
OG0000039	OG0000039	OG0000039	OG0000039	OG0000039	OG0000039	NA	NA
OG0000040	OG0000040	OG0000040	OG0000040	OG0000040	OG0000040	COG0364	Metabolism
OG0000041	OG0000041	OG0000041	OG0000041	OG0000041	OG0000041	COG3631	Poorly Characterized
OG0000042	OG0000042		OG0000042	OG0000042	OG0000042	COG1960	Metabolism
OG0000043	OG0000043	OG0000043	OG0000043	OG0000043	OG0000043	COG5297	Metabolism
OG0000044	OG0000044	OG0000044	OG0000044	OG0000044	OG0000044	COG1807	Cellular Processes And Signaling
OG0000045	OG0000045	OG0000045	OG0000045	OG0000045	OG0000045	COG0745	Information Storage And Processing;Cellular Processes And Signaling
OG0000046	OG0000046	OG0000046	OG0000046	OG0000046	OG0000046	COG4264	Metabolism
OG0000047	OG0000047	OG0000047	OG0000047	OG0000047	OG0000047	COG0846	Cellular Processes And Signaling
OG0000048	OG0000048	OG0000048	OG0000048	OG0000048	OG0000048	COG1802	Information Storage And Processing
OG0000049	OG0000049	OG0000049	OG0000049	OG0000049	OG0000049	COG3448	Cellular Processes And Signaling
OG0000050	OG0000050	OG0000050	OG0000050	OG0000050	OG0000050	COG1012	Metabolism
OG0000051	OG0000051	OG0000051	OG0000051	OG0000051	OG0000051	COG0531	Metabolism
OG0000052	OG0000052	OG0000052	OG0000052	OG0000052	OG0000052	COG1309	Information Storage And Processing
OG0000053	OG0000053	OG0000053	OG0000053	OG0000053	OG0000053	COG0179	Metabolism
OG0000054	OG0000054	OG0000054	OG0000054	OG0000054	OG0000054	NA	NA
OG0000055	OG0000055	OG0000055	OG0000055	OG0000055	OG0000055	COG2217	Metabolism
OG0000056	OG0000056	OG0000056	OG0000056	OG0000056	OG0000056	COG2814	Metabolism
OG0000057	OG0000057	OG0000057	OG0000057	OG0000057	OG0000057	NA	NA
OG0000058	OG0000058	OG0000058	OG0000058	OG0000058	OG0000058	COG2172	Cellular Processes And Signaling
OG0000059	OG0000059	OG0000059	OG0000059	OG0000059	OG0000059	NA	NA
OG0000060	OG0000060	OG0000060	OG0000060	OG0000060	OG0000060	NA	NA
OG0000061	OG0000061	OG0000061	OG0000061	OG0000061	OG0000061	NA	NA
OG0000062	OG0000062	OG0000062	OG0000062	OG0000062	OG0000062	COG0477	Poorly Characterized;Metabolism
OG0000063	OG0000063	OG0000063	OG0000063	OG0000063	OG0000063	NA	NA
OG0000064	OG0000064	OG0000064	OG0000064	OG0000064	OG0000064	COG3118	Cellular Processes And Signaling
OG0000065	OG0000065	OG0000065	OG0000065	OG0000065	OG0000065	COG0492	Cellular Processes And Signaling
OG0000066	OG0000066	OG0000066	OG0000066	OG0000066	OG0000066	COG0395	Metabolism
OG0000067	OG0000067	OG0000067	OG0000067	OG0000067	OG0000067	NA	NA
OG0000068	OG0000068	OG0000068	OG0000068	OG0000068	OG0000068	COG0513	Information Storage And Processing
OG0000069	OG0000069	OG0000069	OG0000069	OG0000069	OG0000069	NA	NA
OG0000070	OG0000070	OG0000070	OG0000070	OG0000070	OG0000070	COG2609	Metabolism
OG0000071	OG0000071	OG0000071	OG0000071	OG0000071	OG0000071	COG0126	Metabolism
OG0000072	OG0000072	OG0000072	OG0000072	OG0000072	OG0000072	NA	NA
OG0000073	OG0000073	OG0000073	OG0000073	OG0000073	OG0000073	COG1609	Information Storage And Processing
OG0000074	OG0000074	OG0000074	OG0000074	OG0000074	OG0000074	COG0160	Metabolism
OG0000075	OG0000075	OG0000075	OG0000075	OG0000075	OG0000075	COG4770	Metabolism
OG0000076	OG0000076	OG0000076	OG0000076	OG0000076	OG0000076	COG0192	Metabolism
OG0000077	OG0000077	OG0000077	OG0000077	OG0000077	OG0000077	COG2226	Metabolism
OG0000078	OG0000078	OG0000078	OG0000078	OG0000078	OG0000078	COG3693	Metabolism
OG0000079	OG0000079	OG0000079	OG0000079	OG0000079	OG0000079	COG2366	Metabolism
OG0000080					OG0000080	NA	NA
OG0000081		OG0000081	OG0000081	OG0000081	OG0000081	COG2197	Cellular Processes And Signaling;Information Storage And Processing
OG0000082		OG0000082	OG0000082	OG0000082	OG0000082	COG3568	Poorly Characterized
OG0000083		OG0000083	OG0000083	OG0000083	OG0000083	COG4948	Cellular Processes And Signaling;Poorly Characterized
OG0000084		OG0000084	OG0000084	OG0000084	OG0000084	COG2963	Metabolism
OG0000085			OG0000085	OG0000085		COG3293	Metabolism
OG0000086			OG0000086	OG0000086		NA	NA
OG0000087	OG0000087		OG0000087	OG0000087	OG0000087	COG0366	Metabolism
OG0000088	OG0000088	OG0000088	OG0000088	OG0000088	OG0000088	COG4762	Poorly Characterized
OG0000089	OG0000089	OG0000089	OG0000089	OG0000089	OG0000089	COG0726	Metabolism;Cellular Processes And Signaling
OG0000090	OG0000090	OG0000090	OG0000090	OG0000090	OG0000090	COG0789	Information Storage And Processing
OG0000091	OG0000091	OG0000091	OG0000091	OG0000091	OG0000091	COG0112	Metabolism
OG0000092	OG0000092	OG0000092	OG0000092	OG0000092	OG0000092	COG1200	Information Storage And Processing
OG0000093	OG0000093	OG0000093	OG0000093	OG0000093	OG0000093	COG1196	Cellular Processes And Signaling
OG0000094	OG0000094	OG0000094	OG0000094	OG0000094	OG0000094	COG0347	Metabolism;Cellular Processes And Signaling
OG0000095	OG0000095	OG0000095	OG0000095	OG0000095	OG0000095	COG0606	Cellular Processes And Signaling
OG0000096	OG0000096	OG0000096	OG0000096	OG0000096	OG0000096	NA	NA
OG0000097	OG0000097	OG0000097	OG0000097	OG0000097	OG0000097	COG1595	Information Storage And Processing
OG0000098	OG0000098	OG0000098	OG0000098	OG0000098	OG0000098	COG1816	Metabolism
OG0000099	OG0000099	OG0000099	OG0000099	OG0000099	OG0000099	NA	NA
OG0000100	OG0000100	OG0000100	OG0000100	OG0000100	OG0000100	COG1674	Cellular Processes And Signaling
OG0000101	OG0000101	OG0000101	OG0000101	OG0000101	OG0000101	COG4264	Metabolism
OG0000102	OG0000102	OG0000102	OG0000102	OG0000102	OG0000102	COG1327	Information Storage And Processing
OG0000103	OG0000103	OG0000103	OG0000103	OG0000103	OG0000103	COG0209	Metabolism
OG0000104	OG0000104	OG0000104			OG0000104	COG0654	Metabolism
OG0000105	OG0000105	OG0000105	OG0000105	OG0000105	OG0000105	COG1670	Information Storage And Processing;Cellular Processes And Signaling
OG0000106	OG0000106	OG0000106	OG0000106	OG0000106	OG0000106	COG0483	Metabolism
OG0000107	OG0000107	OG0000107	OG0000107	OG0000107	OG0000107	NA	NA
OG0000108	OG0000108	OG0000108	OG0000108	OG0000108	OG0000108	COG0640	Information Storage And Processing
OG0000109	OG0000109	OG0000109	OG0000109	OG0000109	OG0000109	COG0702	Poorly Characterized
OG0000110	OG0000110	OG0000110	OG0000110	OG0000110	OG0000110	COG0175	Metabolism
OG0000111	OG0000111	OG0000111	OG0000111	OG0000111	OG0000111	COG3420	Metabolism
OG0000112	OG0000112	OG0000112	OG0000112	OG0000112	OG0000112	NA	NA
OG0000113	OG0000113	OG0000113	OG0000113	OG0000113	OG0000113	COG0300	Poorly Characterized
OG0000114	OG0000114	OG0000114	OG0000114	OG0000114	OG0000114	COG2216	Metabolism
OG0000115	OG0000115		OG0000115	OG0000115	OG0000115	COG2120	Metabolism
OG0000116	OG0000116	OG0000116	OG0000116	OG0000116	OG0000116	COG4290	Metabolism
OG0000117	OG0000117	OG0000117	OG0000117	OG0000117	OG0000117	NA	NA
OG0000118	OG0000118	OG0000118	OG0000118	OG0000118	OG0000118	NA	NA
OG0000119	OG0000119	OG0000119	OG0000119	OG0000119	OG0000119	COG4932	Cellular Processes And Signaling
OG0000120	OG0000120	OG0000120	OG0000120	OG0000120	OG0000120	COG5297	Metabolism
OG0000121	OG0000121	OG0000121	OG0000121	OG0000121	OG0000121	COG1879	Metabolism
OG0000122	OG0000122	OG0000122	OG0000122	OG0000122	OG0000122	COG0288	Metabolism
OG0000123	OG0000123	OG0000123	OG0000123	OG0000123	OG0000123	COG2202	Cellular Processes And Signaling
OG0000124	OG0000124	OG0000124	OG0000124	OG0000124	OG0000124	COG2423	Metabolism
OG0000125	OG0000125	OG0000125	OG0000125	OG0000125	OG0000125	COG2271	Metabolism
OG0000126	OG0000126	OG0000126	OG0000126	OG0000126	OG0000126	COG2310	Cellular Processes And Signaling
OG0000127	OG0000127	OG0000127	OG0000127	OG0000127	OG0000127	COG2197	Information Storage And Processing;Cellular Processes And Signaling
OG0000128	OG0000128	OG0000128	OG0000128	OG0000128	OG0000128	COG3384	Metabolism
OG0000129	OG0000129	OG0000129	OG0000129	OG0000129	OG0000129	COG1012	Metabolism
OG0000130	OG0000130	OG0000130	OG0000130	OG0000130	OG0000130	COG4689	Metabolism
OG0000131	OG0000131	OG0000131	OG0000131	OG0000131	OG0000131	COG1251	Metabolism
OG0000132	OG0000132	OG0000132	OG0000132	OG0000132	OG0000132	COG1141	Metabolism
OG0000133	OG0000133	OG0000133	OG0000133	OG0000133	OG0000133	COG0174	Metabolism
OG0000134	OG0000134	OG0000134	OG0000134	OG0000134	OG0000134	COG1309	Information Storage And Processing
OG0000135	OG0000135	OG0000135	OG0000135	OG0000135	OG0000135	COG2706	Metabolism
OG0000136	OG0000136	OG0000136	OG0000136	OG0000136	OG0000136	COG3226	Information Storage And Processing
OG0000137	OG0000137	OG0000137	OG0000137	OG0000137	OG0000137	COG1741	Poorly Characterized
OG0000138	OG0000138	OG0000138	OG0000138	OG0000138	OG0000138	COG0861	Metabolism
OG0000139	OG0000139	OG0000139	OG0000139	OG0000139	OG0000139	COG3618	Poorly Characterized
OG0000140	OG0000140	OG0000140	OG0000140	OG0000140	OG0000140	COG1028	Metabolism
OG0000141	OG0000141	OG0000141	OG0000141	OG0000141	OG0000141	COG0739	Cellular Processes And Signaling
OG0000142	OG0000142	OG0000142	OG0000142	OG0000142	OG0000142	COG2141	Poorly Characterized;Metabolism
OG0000143	OG0000143	OG0000143	OG0000143	OG0000143	OG0000143	COG1172	Metabolism
OG0000144	OG0000144	OG0000144	OG0000144	OG0000144		COG2226	Metabolism
OG0000145	OG0000145		OG0000145	OG0000145	OG0000145	COG0604	Poorly Characterized;Metabolism
OG0000146	OG0000146	OG0000146	OG0000146	OG0000146	OG0000146	COG1486	Metabolism
OG0000147	OG0000147	OG0000147	OG0000147	OG0000147	OG0000147	COG1349	Metabolism;Information Storage And Processing
OG0000148	OG0000148	OG0000148	OG0000148	OG0000148	OG0000148	COG2124	Cellular Processes And Signaling;Metabolism
OG0000149	OG0000149	OG0000149	OG0000149	OG0000149	OG0000149	NA	NA
OG0000150	OG0000150	OG0000150	OG0000150	OG0000150	OG0000150	COG0642	Cellular Processes And Signaling
OG0000151	OG0000151	OG0000151	OG0000151	OG0000151	OG0000151	COG1131	Cellular Processes And Signaling
OG0000152	OG0000152	OG0000152	OG0000152	OG0000152	OG0000152	COG3321	Metabolism
OG0000153	OG0000153	OG0000153	OG0000153	OG0000153	OG0000153	COG2814	Metabolism
OG0000154	OG0000154	OG0000154	OG0000154	OG0000154	OG0000154	COG0624	Metabolism
OG0000155	OG0000155	OG0000155	OG0000155	OG0000155	OG0000155	COG1146	Metabolism
OG0000156	OG0000156	OG0000156	OG0000156	OG0000156	OG0000156	COG4770	Metabolism
OG0000157	OG0000157	OG0000157	OG0000157	OG0000157	OG0000157	COG1249	Metabolism
OG0000158	OG0000158	OG0000158	OG0000158	OG0000158	OG0000158	COG1816	Metabolism
OG0000159	OG0000159	OG0000159	OG0000159	OG0000159	OG0000159	NA	NA
OG0000160	OG0000160	OG0000160	OG0000160	OG0000160	OG0000160	COG0515	Cellular Processes And Signaling
OG0000161	OG0000161	OG0000161	OG0000161	OG0000161	OG0000161	COG0049	Information Storage And Processing
OG0000162	OG0000162	OG0000162	OG0000162	OG0000162		COG1816	Metabolism
OG0000163	OG0000163	OG0000163	OG0000163	OG0000163		NA	NA
OG0000164	OG0000164	OG0000164	OG0000164	OG0000164		COG2188	Information Storage And Processing
OG0000165	OG0000165	OG0000165	OG0000165	OG0000165		NA	NA
OG0000166	OG0000166	OG0000166	OG0000166	OG0000166		COG1674	Cellular Processes And Signaling
OG0000167	OG0000167	OG0000167	OG0000167	OG0000167		NA	NA
OG0000168	OG0000168	OG0000168	OG0000168	OG0000168		NA	NA
OG0000169	OG0000169	OG0000169	OG0000169	OG0000169	OG0000169	NA	NA
OG0000170	OG0000170	OG0000170	OG0000170	OG0000170	OG0000170	COG1319	Metabolism
OG0000171	OG0000171	OG0000171	OG0000171	OG0000171	OG0000171	COG0300	Poorly Characterized
OG0000172	OG0000172	OG0000172	OG0000172		OG0000172	COG1063	Metabolism;Poorly Characterized
OG0000173	OG0000173	OG0000173	OG0000173	OG0000173	OG0000173	COG0640	Information Storage And Processing
OG0000174	OG0000174	OG0000174	OG0000174	OG0000174	OG0000174	COG0640	Information Storage And Processing
OG0000175	OG0000175	OG0000175	OG0000175	OG0000175	OG0000175	COG0394	Cellular Processes And Signaling
OG0000176	OG0000176	OG0000176	OG0000176	OG0000176	OG0000176	COG1210	Cellular Processes And Signaling
OG0000177	OG0000177	OG0000177	OG0000177	OG0000177	OG0000177	NA	NA
OG0000178	OG0000178	OG0000178	OG0000178	OG0000178	OG0000178	COG2141	Metabolism;Poorly Characterized
OG0000179	OG0000179	OG0000179	OG0000179	OG0000179	OG0000179	COG0642	Cellular Processes And Signaling
OG0000180	OG0000180				OG0000180	NA	NA
OG0000181	OG0000181		OG0000181	OG0000181	OG0000181	NA	NA
OG0000182	OG0000182	OG0000182	OG0000182	OG0000182	OG0000182	NA	NA
OG0000183	OG0000183	OG0000183	OG0000183	OG0000183	OG0000183	COG4875	Cellular Processes And Signaling
OG0000184	OG0000184	OG0000184	OG0000184	OG0000184	OG0000184	NA	NA
OG0000185	OG0000185	OG0000185	OG0000185	OG0000185	OG0000185	COG0436	Metabolism
OG0000186	OG0000186	OG0000186	OG0000186	OG0000186	OG0000186	COG1830	Metabolism
OG0000187	OG0000187	OG0000187	OG0000187	OG0000187	OG0000187	COG2188	Information Storage And Processing
OG0000188	OG0000188	OG0000188	OG0000188	OG0000188	OG0000188	NA	NA
OG0000189	OG0000189	OG0000189	OG0000189	OG0000189	OG0000189	NA	NA
OG0000190	OG0000190	OG0000190	OG0000190	OG0000190	OG0000190	COG0596	Metabolism;Poorly Characterized
OG0000191	OG0000191	OG0000191	OG0000191	OG0000191	OG0000191	COG2202	Cellular Processes And Signaling
OG0000192	OG0000192	OG0000192	OG0000192	OG0000192	OG0000192	COG0745	Information Storage And Processing;Cellular Processes And Signaling
OG0000193	OG0000193	OG0000193	OG0000193	OG0000193		COG2366	Metabolism
OG0000194	OG0000194	OG0000194	OG0000194	OG0000194	OG0000194	COG1175	Metabolism
OG0000195	OG0000195	OG0000195	OG0000195	OG0000195	OG0000195	COG1874	Metabolism
OG0000196	OG0000196	OG0000196	OG0000196	OG0000196	OG0000196	NA	NA
OG0000197	OG0000197	OG0000197	OG0000197	OG0000197	OG0000197	NA	NA
OG0000198	OG0000198	OG0000198	OG0000198	OG0000198	OG0000198	NA	NA
OG0000199	OG0000199	OG0000199	OG0000199	OG0000199	OG0000199	COG3866	Metabolism
OG0000200	OG0000200	OG0000200	OG0000200	OG0000200	OG0000200	COG3973	Information Storage And Processing
OG0000201	OG0000201	OG0000201	OG0000201	OG0000201	OG0000201	COG0604	Metabolism;Poorly Characterized
OG0000202	OG0000202	OG0000202	OG0000202	OG0000202	OG0000202	COG1940	Information Storage And Processing;Metabolism
OG0000203	OG0000203	OG0000203	OG0000203	OG0000203	OG0000203	COG2378	Information Storage And Processing
OG0000204	OG0000204	OG0000204	OG0000204	OG0000204	OG0000204	COG1840	Metabolism
OG0000205	OG0000205	OG0000205	OG0000205	OG0000205	OG0000205	COG0842	Cellular Processes And Signaling
OG0000206	OG0000206	OG0000206	OG0000206	OG0000206	OG0000206	NA	NA
OG0000207	OG0000207	OG0000207	OG0000207	OG0000207	OG0000207	COG0697	Poorly Characterized;Metabolism
OG0000208	OG0000208	OG0000208	OG0000208	OG0000208	OG0000208	NA	NA
OG0000209	OG0000209	OG0000209	OG0000209	OG0000209	OG0000209	NA	NA
OG0000210	OG0000210	OG0000210	OG0000210	OG0000210	OG0000210	NA	NA
OG0000211	OG0000211	OG0000211	OG0000211	OG0000211	OG0000211	COG3956	Poorly Characterized
OG0000212	OG0000212	OG0000212	OG0000212	OG0000212	OG0000212	COG0654	Metabolism
OG0000213	OG0000213	OG0000213	OG0000213	OG0000213	OG0000213	COG3525	Metabolism
OG0000214	OG0000214	OG0000214	OG0000214	OG0000214	OG0000214	COG3327	Information Storage And Processing
OG0000215	OG0000215	OG0000215	OG0000215	OG0000215	OG0000215	NA	NA
OG0000216	OG0000216	OG0000216	OG0000216	OG0000216	OG0000216	COG1082	Metabolism
OG0000217	OG0000217	OG0000217	OG0000217	OG0000217	OG0000217	COG0524	Metabolism
OG0000218	OG0000218	OG0000218	OG0000218	OG0000218	OG0000218	COG1695	Information Storage And Processing
OG0000219	OG0000219	OG0000219	OG0000219	OG0000219	OG0000219	COG0665	Metabolism
OG0000220	OG0000220	OG0000220	OG0000220	OG0000220	OG0000220	COG0404	Metabolism
OG0000221	OG0000221	OG0000221	OG0000221	OG0000221	OG0000221	NA	NA
OG0000222	OG0000222	OG0000222	OG0000222	OG0000222	OG0000222	COG3631	Poorly Characterized
OG0000223	OG0000223	OG0000223	OG0000223	OG0000223	OG0000223	NA	NA
OG0000224	OG0000224	OG0000224	OG0000224	OG0000224	OG0000224	COG1846	Information Storage And Processing
OG0000225	OG0000225	OG0000225	OG0000225	OG0000225	OG0000225	COG2814	Metabolism
OG0000226	OG0000226	OG0000226	OG0000226	OG0000226	OG0000226	COG1123	Cellular Processes And Signaling
OG0000227	OG0000227	OG0000227	OG0000227	OG0000227	OG0000227	COG1670	Information Storage And Processing;Cellular Processes And Signaling
OG0000228	OG0000228	OG0000228	OG0000228	OG0000228	OG0000228	COG4934	Cellular Processes And Signaling
OG0000229	OG0000229	OG0000229	OG0000229	OG0000229	OG0000229	COG4097	Metabolism
OG0000230	OG0000230	OG0000230	OG0000230	OG0000230	OG0000230	NA	NA
OG0000231	OG0000231	OG0000231	OG0000231	OG0000231	OG0000231	COG0265	Cellular Processes And Signaling
OG0000232	OG0000232	OG0000232	OG0000232	OG0000232	OG0000232	COG1290	Metabolism
OG0000233	OG0000233	OG0000233	OG0000233	OG0000233	OG0000233	COG0648	Information Storage And Processing
OG0000234	OG0000234	OG0000234	OG0000234	OG0000234	OG0000234	COG1305	Cellular Processes And Signaling
OG0000235	OG0000235	OG0000235	OG0000235	OG0000235	OG0000235	COG0181	Metabolism
OG0000236	OG0000236	OG0000236	OG0000236	OG0000236	OG0000236	NA	NA
OG0000237	OG0000237		OG0000237	OG0000237	OG0000237	COG1309	Information Storage And Processing
OG0000238	OG0000238	OG0000238	OG0000238	OG0000238	OG0000238	COG1621	Metabolism
OG0000239	OG0000239	OG0000239	OG0000239	OG0000239	OG0000239	COG0652	Cellular Processes And Signaling
OG0000240	OG0000240			OG0000240	OG0000240	COG3293	Metabolism
OG0000241	OG0000241	OG0000241		OG0000241	OG0000241	COG3464	Metabolism
OG0000242	OG0000242	OG0000242	OG0000242	OG0000242	OG0000242	COG3118	Cellular Processes And Signaling
OG0000243	OG0000243	OG0000243	OG0000243	OG0000243	OG0000243	COG2073	Metabolism
OG0000244	OG0000244	OG0000244	OG0000244	OG0000244	OG0000244	COG1240	Metabolism
OG0000245	OG0000245	OG0000245	OG0000245	OG0000245	OG0000245	COG1302	Poorly Characterized
OG0000246	OG0000246	OG0000246	OG0000246	OG0000246	OG0000246	NA	NA
OG0000247	OG0000247	OG0000247	OG0000247	OG0000247	OG0000247	COG2896	Metabolism
OG0000248	OG0000248	OG0000248	OG0000248	OG0000248	OG0000248	COG3387	Metabolism
OG0000249	OG0000249	OG0000249	OG0000249	OG0000249	OG0000249	COG0283	Metabolism
OG0000250	OG0000250	OG0000250	OG0000250	OG0000250	OG0000250	COG0671	Metabolism
OG0000251	OG0000251	OG0000251	OG0000251	OG0000251	OG0000251	COG4529	Poorly Characterized
OG0000252	OG0000252	OG0000252	OG0000252	OG0000252	OG0000252	COG1410	Metabolism
OG0000253	OG0000253	OG0000253	OG0000253	OG0000253	OG0000253	COG1275	Cellular Processes And Signaling
OG0000254	OG0000254	OG0000254	OG0000254	OG0000254	OG0000254	COG0174	Metabolism
OG0000255	OG0000255		OG0000255	OG0000255	OG0000255	COG1309	Information Storage And Processing
OG0000256	OG0000256	OG0000256	OG0000256	OG0000256	OG0000256	COG2038	Metabolism
OG0000257	OG0000257	OG0000257	OG0000257	OG0000257	OG0000257	COG2141	Metabolism;Poorly Characterized
OG0000258	OG0000258	OG0000258	OG0000258	OG0000258	OG0000258	COG0531	Metabolism
OG0000259	OG0000259	OG0000259	OG0000259	OG0000259	OG0000259	COG1012	Metabolism
OG0000260	OG0000260	OG0000260	OG0000260	OG0000260	OG0000260	COG1003	Metabolism
OG0000261	OG0000261	OG0000261	OG0000261	OG0000261	OG0000261	COG1253	Poorly Characterized
OG0000262	OG0000262	OG0000262	OG0000262	OG0000262	OG0000262	COG2208	Cellular Processes And Signaling;Information Storage And Processing
OG0000263	OG0000263	OG0000263	OG0000263	OG0000263	OG0000263	COG5520	Cellular Processes And Signaling
OG0000264	OG0000264	OG0000264	OG0000264	OG0000264	OG0000264	COG1121	Metabolism
OG0000265	OG0000265	OG0000265	OG0000265	OG0000265	OG0000265	COG0803	Metabolism
OG0000266	OG0000266	OG0000266	OG0000266	OG0000266	OG0000266	COG1132	Cellular Processes And Signaling
OG0000267	OG0000267	OG0000267	OG0000267	OG0000267	OG0000267	COG1301	Metabolism
OG0000268	OG0000268	OG0000268	OG0000268	OG0000268		COG3669	Metabolism
OG0000269	OG0000269	OG0000269	OG0000269	OG0000269	OG0000269	COG1028	Metabolism
OG0000270	OG0000270	OG0000270	OG0000270	OG0000270	OG0000270	NA	NA
OG0000271	OG0000271	OG0000271	OG0000271	OG0000271	OG0000271	COG1595	Information Storage And Processing
OG0000272	OG0000272	OG0000272	OG0000272	OG0000272	OG0000272	COG3254	Cellular Processes And Signaling
OG0000273	OG0000273	OG0000273	OG0000273	OG0000273	OG0000273	COG0431	Metabolism
OG0000274	OG0000274	OG0000274	OG0000274	OG0000274	OG0000274	COG5470	Poorly Characterized
OG0000275	OG0000275	OG0000275	OG0000275	OG0000275	OG0000275	NA	NA
OG0000276	OG0000276	OG0000276	OG0000276	OG0000276	OG0000276	COG0515	Cellular Processes And Signaling
OG0000277		OG0000277	OG0000277	OG0000277	OG0000277	COG2197	Information Storage And Processing;Cellular Processes And Signaling
OG0000278			OG0000278	OG0000278	OG0000278	COG2801	Metabolism
OG0000279		OG0000279	OG0000279	OG0000279		COG2172	Cellular Processes And Signaling
OG0000280		OG0000280				COG3316	Metabolism
OG0000281		OG0000281	OG0000281	OG0000281		NA	NA
OG0000282		OG0000282	OG0000282	OG0000282		NA	NA
OG0000283		OG0000283	OG0000283	OG0000283		NA	NA
OG0000284	OG0000284	OG0000284	OG0000284	OG0000284	OG0000284	COG4935	Cellular Processes And Signaling
OG0000285	OG0000285	OG0000285	OG0000285	OG0000285	OG0000285	COG0058	Metabolism
OG0000286	OG0000286	OG0000286	OG0000286	OG0000286	OG0000286	COG4935	Cellular Processes And Signaling
OG0000287	OG0000287	OG0000287	OG0000287	OG0000287	OG0000287	COG1132	Cellular Processes And Signaling
OG0000288	OG0000288	OG0000288	OG0000288	OG0000288	OG0000288	COG1132	Cellular Processes And Signaling
OG0000289	OG0000289	OG0000289	OG0000289	OG0000289	OG0000289	COG1132	Cellular Processes And Signaling
OG0000290	OG0000290	OG0000290		OG0000290	OG0000290	COG1132	Cellular Processes And Signaling
OG0000291	OG0000291		OG0000291	OG0000291	OG0000291	COG4585	Cellular Processes And Signaling
OG0000292	OG0000292	OG0000292	OG0000292	OG0000292	OG0000292	COG1523	Metabolism
OG0000293	OG0000293	OG0000293	OG0000293	OG0000293	OG0000293	COG1376	Cellular Processes And Signaling
OG0000294	OG0000294	OG0000294	OG0000294	OG0000294	OG0000294	COG1376	Cellular Processes And Signaling
OG0000295	OG0000295	OG0000295	OG0000295	OG0000295	OG0000295	COG1024	Metabolism
OG0000296	OG0000296	OG0000296	OG0000296	OG0000296	OG0000296	COG3391	Poorly Characterized
OG0000297	OG0000297	OG0000297	OG0000297	OG0000297	OG0000297	NA	NA
OG0000298	OG0000298	OG0000298	OG0000298	OG0000298	OG0000298	COG5126	Cellular Processes And Signaling
OG0000299	OG0000299	OG0000299	OG0000299	OG0000299	OG0000299	COG3757	Cellular Processes And Signaling
OG0000300	OG0000300	OG0000300	OG0000300	OG0000300	OG0000300	COG1760	Metabolism
OG0000301	OG0000301	OG0000301	OG0000301	OG0000301	OG0000301	COG0509	Metabolism
OG0000302	OG0000302	OG0000302	OG0000302	OG0000302	OG0000302	COG0404	Metabolism
OG0000303	OG0000303	OG0000303	OG0000303	OG0000303	OG0000303	NA	NA
OG0000304	OG0000304	OG0000304	OG0000304	OG0000304	OG0000304	NA	NA
OG0000305	OG0000305	OG0000305	OG0000305	OG0000305	OG0000305	NA	NA
OG0000306	OG0000306	OG0000306	OG0000306	OG0000306	OG0000306	COG0444	Metabolism
OG0000307	OG0000307	OG0000307	OG0000307	OG0000307	OG0000307	COG4608	Metabolism
OG0000308	OG0000308	OG0000308	OG0000308	OG0000308	OG0000308	COG2860	Poorly Characterized
OG0000309	OG0000309	OG0000309	OG0000309	OG0000309	OG0000309	COG2382	Metabolism
OG0000310	OG0000310	OG0000310	OG0000310	OG0000310	OG0000310	COG1946	Metabolism
OG0000311	OG0000311	OG0000311	OG0000311	OG0000311	OG0000311	COG1309	Information Storage And Processing
OG0000312	OG0000312	OG0000312	OG0000312	OG0000312	OG0000312	NA	NA
OG0000313	OG0000313	OG0000313	OG0000313	OG0000313	OG0000313	NA	NA
OG0000314	OG0000314	OG0000314	OG0000314	OG0000314	OG0000314	COG3023	Cellular Processes And Signaling
OG0000315	OG0000315	OG0000315	OG0000315	OG0000315	OG0000315	COG0482	Information Storage And Processing
OG0000316	OG0000316	OG0000316	OG0000316	OG0000316	OG0000316	COG0300	Poorly Characterized
OG0000317	OG0000317	OG0000317	OG0000317	OG0000317	OG0000317	COG0620	Metabolism
OG0000318	OG0000318	OG0000318	OG0000318	OG0000318	OG0000318	COG0272	Information Storage And Processing
OG0000319	OG0000319	OG0000319	OG0000319	OG0000319	OG0000319	COG5001	Cellular Processes And Signaling
OG0000320	OG0000320	OG0000320	OG0000320	OG0000320	OG0000320	COG0721	Information Storage And Processing
OG0000321	OG0000321	OG0000321	OG0000321	OG0000321	OG0000321	COG0154	Information Storage And Processing
OG0000322	OG0000322	OG0000322	OG0000322	OG0000322	OG0000322	NA	NA
OG0000323	OG0000323	OG0000323	OG0000323	OG0000323	OG0000323	COG0064	Information Storage And Processing
OG0000324	OG0000324	OG0000324	OG0000324	OG0000324	OG0000324	COG2230	Metabolism
OG0000325	OG0000325	OG0000325	OG0000325	OG0000325	OG0000325	NA	NA
OG0000326	OG0000326	OG0000326	OG0000326	OG0000326	OG0000326	COG2409	Poorly Characterized
OG0000327	OG0000327	OG0000327	OG0000327	OG0000327	OG0000327	COG1670	Cellular Processes And Signaling;Information Storage And Processing
OG0000328	OG0000328	OG0000328	OG0000328	OG0000328	OG0000328	NA	NA
OG0000329	OG0000329	OG0000329	OG0000329	OG0000329	OG0000329	NA	NA
OG0000330	OG0000330	OG0000330	OG0000330	OG0000330	OG0000330	COG3899	Poorly Characterized
OG0000331	OG0000331	OG0000331	OG0000331	OG0000331	OG0000331	COG2133	Metabolism
OG0000332	OG0000332	OG0000332	OG0000332	OG0000332	OG0000332	COG0667	Metabolism;Poorly Characterized
OG0000333	OG0000333	OG0000333	OG0000333	OG0000333	OG0000333	COG0111	Metabolism
OG0000334	OG0000334	OG0000334	OG0000334	OG0000334	OG0000334	COG5001	Cellular Processes And Signaling
OG0000335	OG0000335	OG0000335	OG0000335	OG0000335	OG0000335	COG0028	Metabolism
OG0000336	OG0000336	OG0000336	OG0000336	OG0000336	OG0000336	COG0440	Metabolism
OG0000337	OG0000337	OG0000337	OG0000337	OG0000337	OG0000337	COG0111	Metabolism
OG0000338	OG0000338	OG0000338	OG0000338	OG0000338	OG0000338	COG1309	Information Storage And Processing
OG0000339	OG0000339	OG0000339	OG0000339	OG0000339	OG0000339	COG2508	Information Storage And Processing
OG0000340	OG0000340	OG0000340	OG0000340	OG0000340	OG0000340	COG0506	Metabolism
OG0000341	OG0000341	OG0000341	OG0000341	OG0000341	OG0000341	COG1012	Metabolism
OG0000342	OG0000342	OG0000342	OG0000342	OG0000342	OG0000342	NA	NA
OG0000343	OG0000343	OG0000343	OG0000343	OG0000343	OG0000343	COG1409	Cellular Processes And Signaling
OG0000344	OG0000344	OG0000344	OG0000344	OG0000344	OG0000344	COG0473	Metabolism
OG0000345	OG0000345	OG0000345	OG0000345	OG0000345	OG0000345	COG0115	Metabolism
OG0000346	OG0000346	OG0000346	OG0000346	OG0000346	OG0000346	COG0119	Metabolism
OG0000347	OG0000347	OG0000347	OG0000347	OG0000347	OG0000347	COG5640	Cellular Processes And Signaling
OG0000348	OG0000348	OG0000348	OG0000348	OG0000348	OG0000348	COG4430	Poorly Characterized
OG0000349	OG0000349	OG0000349	OG0000349	OG0000349	OG0000349	COG2353	Poorly Characterized
OG0000350	OG0000350	OG0000350	OG0000350	OG0000350	OG0000350	COG2229	Cellular Processes And Signaling
OG0000351	OG0000351	OG0000351	OG0000351	OG0000351	OG0000351	COG2205	Cellular Processes And Signaling
OG0000352	OG0000352	OG0000352	OG0000352	OG0000352	OG0000352	COG2229	Cellular Processes And Signaling
OG0000353	OG0000353	OG0000353	OG0000353	OG0000353	OG0000353	COG0642	Cellular Processes And Signaling
OG0000354	OG0000354	OG0000354	OG0000354	OG0000354	OG0000354	NA	NA
OG0000355	OG0000355	OG0000355	OG0000355	OG0000355	OG0000355	COG0179	Metabolism
OG0000356	OG0000356	OG0000356	OG0000356	OG0000356	OG0000356	COG0008	Information Storage And Processing
OG0000357	OG0000357	OG0000357	OG0000357	OG0000357	OG0000357	COG1011	Metabolism
OG0000358	OG0000358	OG0000358	OG0000358	OG0000358	OG0000358	COG1414	Information Storage And Processing
OG0000359	OG0000359	OG0000359	OG0000359	OG0000359	OG0000359	COG0065	Metabolism
OG0000360	OG0000360	OG0000360	OG0000360	OG0000360	OG0000360	COG0066	Metabolism
OG0000361	OG0000361	OG0000361	OG0000361	OG0000361	OG0000361	NA	NA
OG0000362	OG0000362	OG0000362	OG0000362	OG0000362	OG0000362	COG0776	Information Storage And Processing
OG0000363	OG0000363	OG0000363	OG0000363	OG0000363	OG0000363	COG1920	Metabolism
OG0000364	OG0000364	OG0000364	OG0000364	OG0000364	OG0000364	COG0240	Metabolism
OG0000365	OG0000365	OG0000365	OG0000365	OG0000365	OG0000365	COG1181	Poorly Characterized;Cellular Processes And Signaling
OG0000366	OG0000366	OG0000366	OG0000366	OG0000366	OG0000366	NA	NA
OG0000367	OG0000367	OG0000367	OG0000367	OG0000367	OG0000367	COG1522	Information Storage And Processing
OG0000368	OG0000368	OG0000368	OG0000368	OG0000368	OG0000368	COG0611	Metabolism
OG0000369	OG0000369	OG0000369	OG0000369	OG0000369	OG0000369	COG0351	Metabolism
OG0000370	OG0000370	OG0000370	OG0000370	OG0000370	OG0000370	COG0227	Information Storage And Processing
OG0000371	OG0000371	OG0000371	OG0000371	OG0000371	OG0000371	NA	NA
OG0000372	OG0000372	OG0000372	OG0000372	OG0000372	OG0000372	COG0326	Cellular Processes And Signaling
OG0000373	OG0000373	OG0000373	OG0000373	OG0000373	OG0000373	COG0742	Information Storage And Processing
OG0000374	OG0000374	OG0000374	OG0000374	OG0000374	OG0000374	COG0669	Metabolism
OG0000375	OG0000375	OG0000375	OG0000375	OG0000375	OG0000375	COG0711	Metabolism
OG0000376	OG0000376	OG0000376	OG0000376	OG0000376	OG0000376	COG1399	Information Storage And Processing
OG0000377	OG0000377	OG0000377	OG0000377	OG0000377	OG0000377	COG0333	Information Storage And Processing
OG0000378	OG0000378	OG0000378	OG0000378	OG0000378	OG0000378	COG0571	Information Storage And Processing
OG0000379	OG0000379	OG0000379	OG0000379	OG0000379	OG0000379	COG0266	Information Storage And Processing
OG0000380	OG0000380	OG0000380	OG0000380	OG0000380	OG0000380	COG1733	Information Storage And Processing
OG0000381	OG0000381	OG0000381	OG0000381	OG0000381	OG0000381	COG2340	Cellular Processes And Signaling;Poorly Characterized
OG0000382	OG0000382	OG0000382	OG0000382	OG0000382	OG0000382	COG1254	Metabolism
OG0000383	OG0000383	OG0000383	OG0000383	OG0000383	OG0000383	NA	NA
OG0000384	OG0000384	OG0000384	OG0000384	OG0000384	OG0000384	COG2814	Metabolism
OG0000385	OG0000385	OG0000385	OG0000385	OG0000385	OG0000385	COG2141	Metabolism;Poorly Characterized
OG0000386	OG0000386	OG0000386	OG0000386	OG0000386	OG0000386	COG0552	Cellular Processes And Signaling
OG0000387	OG0000387	OG0000387	OG0000387	OG0000387	OG0000387	NA	NA
OG0000388	OG0000388	OG0000388	OG0000388	OG0000388	OG0000388	NA	NA
OG0000389	OG0000389	OG0000389	OG0000389	OG0000389	OG0000389	COG0004	Metabolism
OG0000390	OG0000390	OG0000390	OG0000390	OG0000390	OG0000390	COG2844	Cellular Processes And Signaling
OG0000391	OG0000391	OG0000391	OG0000391	OG0000391	OG0000391	COG0541	Cellular Processes And Signaling
OG0000392	OG0000392	OG0000392	OG0000392	OG0000392	OG0000392	NA	NA
OG0000393	OG0000393	OG0000393	OG0000393	OG0000393	OG0000393	COG0442	Information Storage And Processing
OG0000394	OG0000394	OG0000394	OG0000394	OG0000394	OG0000394	NA	NA
OG0000395	OG0000395	OG0000395	OG0000395	OG0000395	OG0000395	COG0228	Information Storage And Processing
OG0000396	OG0000396	OG0000396	OG0000396	OG0000396	OG0000396	COG1837	Poorly Characterized
OG0000397	OG0000397	OG0000397	OG0000397	OG0000397	OG0000397	COG0806	Information Storage And Processing
OG0000398	OG0000398	OG0000398	OG0000398	OG0000398	OG0000398	COG0336	Information Storage And Processing
OG0000399	OG0000399	OG0000399	OG0000399	OG0000399	OG0000399	COG0335	Information Storage And Processing
OG0000400	OG0000400	OG0000400	OG0000400	OG0000400	OG0000400	COG0681	Cellular Processes And Signaling
OG0000401	OG0000401	OG0000401	OG0000401	OG0000401	OG0000401	COG0681	Cellular Processes And Signaling
OG0000402	OG0000402	OG0000402	OG0000402	OG0000402	OG0000402	COG0681	Cellular Processes And Signaling
OG0000403	OG0000403	OG0000403	OG0000403	OG0000403	OG0000403	COG0681	Cellular Processes And Signaling
OG0000404	OG0000404	OG0000404	OG0000404	OG0000404	OG0000404	NA	NA
OG0000405	OG0000405	OG0000405	OG0000405	OG0000405	OG0000405	COG0792	Information Storage And Processing
OG0000406	OG0000406	OG0000406	OG0000406	OG0000406	OG0000406	COG0758	Information Storage And Processing
OG0000407	OG0000407	OG0000407	OG0000407	OG0000407	OG0000407	COG1191	Information Storage And Processing
OG0000408	OG0000408	OG0000408	OG0000408	OG0000408	OG0000408	COG1309	Information Storage And Processing
OG0000409	OG0000409	OG0000409	OG0000409	OG0000409	OG0000409	COG4942	Cellular Processes And Signaling
OG0000410	OG0000410	OG0000410	OG0000410	OG0000410	OG0000410	COG0052	Information Storage And Processing
OG0000411	OG0000411	OG0000411	OG0000411	OG0000411	OG0000411	COG0264	Information Storage And Processing
OG0000412	OG0000412	OG0000412	OG0000412	OG0000412	OG0000412	COG0528	Metabolism
OG0000413	OG0000413	OG0000413	OG0000413	OG0000413	OG0000413	COG0233	Information Storage And Processing
OG0000414	OG0000414	OG0000414	OG0000414	OG0000414	OG0000414	COG0575	Metabolism
OG0000415	OG0000415	OG0000415	OG0000415	OG0000415	OG0000415	NA	NA
OG0000416	OG0000416	OG0000416	OG0000416	OG0000416	OG0000416	COG0820	Information Storage And Processing
OG0000417	OG0000417	OG0000417	OG0000417	OG0000417	OG0000417	COG4143	Metabolism
OG0000418	OG0000418	OG0000418	OG0000418	OG0000418	OG0000418	COG1178	Metabolism
OG0000419	OG0000419	OG0000419	OG0000419	OG0000419	OG0000419	COG3842	Metabolism
OG0000420	OG0000420	OG0000420	OG0000420	OG0000420	OG0000420	NA	NA
OG0000421	OG0000421	OG0000421	OG0000421	OG0000421	OG0000421	COG1611	Metabolism
OG0000422	OG0000422	OG0000422	OG0000422	OG0000422	OG0000422	COG3607	Poorly Characterized
OG0000423	OG0000423	OG0000423	OG0000423	OG0000423	OG0000423	COG1136	Cellular Processes And Signaling
OG0000424	OG0000424	OG0000424	OG0000424	OG0000424	OG0000424	COG0161	Metabolism
OG0000425	OG0000425	OG0000425	OG0000425	OG0000425	OG0000425	COG1522	Information Storage And Processing
OG0000426	OG0000426	OG0000426	OG0000426	OG0000426	OG0000426	COG1012	Metabolism
OG0000427	OG0000427	OG0000427	OG0000427	OG0000427	OG0000427	COG1680	Cellular Processes And Signaling
OG0000428	OG0000428	OG0000428	OG0000428	OG0000428	OG0000428	COG0584	Metabolism
OG0000429	OG0000429	OG0000429	OG0000429	OG0000429	OG0000429	NA	NA
OG0000430	OG0000430	OG0000430	OG0000430	OG0000430	OG0000430	COG3236	Metabolism;Cellular Processes And Signaling
OG0000431	OG0000431	OG0000431	OG0000431	OG0000431	OG0000431	COG1012	Metabolism
OG0000432	OG0000432	OG0000432	OG0000432	OG0000432	OG0000432	COG0687	Metabolism
OG0000433	OG0000433	OG0000433	OG0000433	OG0000433	OG0000433	COG3842	Metabolism
OG0000434	OG0000434	OG0000434	OG0000434	OG0000434	OG0000434	COG1176	Metabolism
OG0000435	OG0000435	OG0000435	OG0000435	OG0000435	OG0000435	COG1177	Metabolism
OG0000436	OG0000436	OG0000436	OG0000436	OG0000436	OG0000436	COG0665	Metabolism
OG0000437	OG0000437	OG0000437	OG0000437	OG0000437	OG0000437	NA	NA
OG0000438	OG0000438	OG0000438	OG0000438	OG0000438	OG0000438	NA	NA
OG0000439	OG0000439	OG0000439	OG0000439	OG0000439	OG0000439	COG0160	Metabolism
OG0000440	OG0000440	OG0000440	OG0000440	OG0000440	OG0000440	NA	NA
OG0000441	OG0000441	OG0000441	OG0000441	OG0000441	OG0000441	COG2508	Information Storage And Processing
OG0000442	OG0000442	OG0000442	OG0000442	OG0000442	OG0000442	COG1012	Metabolism
OG0000443	OG0000443	OG0000443	OG0000443	OG0000443	OG0000443	COG1472	Metabolism
OG0000444	OG0000444	OG0000444	OG0000444	OG0000444	OG0000444	COG1653	Metabolism
OG0000445	OG0000445	OG0000445	OG0000445	OG0000445	OG0000445	COG4209	Metabolism
OG0000446	OG0000446	OG0000446	OG0000446	OG0000446	OG0000446	COG0395	Metabolism
OG0000447	OG0000447	OG0000447	OG0000447	OG0000447	OG0000447	NA	NA
OG0000448	OG0000448	OG0000448	OG0000448	OG0000448	OG0000448	COG1874	Metabolism
OG0000449	OG0000449	OG0000449	OG0000449	OG0000449	OG0000449	NA	NA
OG0000450	OG0000450	OG0000450	OG0000450	OG0000450	OG0000450	NA	NA
OG0000451	OG0000451	OG0000451	OG0000451	OG0000451	OG0000451	COG1501	Metabolism
OG0000452	OG0000452	OG0000452	OG0000452	OG0000452	OG0000452	COG1609	Information Storage And Processing
OG0000453	OG0000453	OG0000453	OG0000453	OG0000453	OG0000453	COG1960	Metabolism
OG0000454	OG0000454	OG0000454	OG0000454	OG0000454	OG0000454	NA	NA
OG0000455	OG0000455	OG0000455	OG0000455	OG0000455	OG0000455	COG0743	Metabolism
OG0000456	OG0000456	OG0000456	OG0000456	OG0000456	OG0000456	COG0750	Cellular Processes And Signaling;Information Storage And Processing
OG0000457	OG0000457	OG0000457	OG0000457	OG0000457	OG0000457	COG3393	Poorly Characterized
OG0000458	OG0000458	OG0000458	OG0000458	OG0000458	OG0000458	COG0456	Information Storage And Processing
OG0000459	OG0000459	OG0000459	OG0000459	OG0000459	OG0000459	COG0442	Information Storage And Processing
OG0000460	OG0000460	OG0000460	OG0000460	OG0000460	OG0000460	COG3570	Cellular Processes And Signaling
OG0000461	OG0000461	OG0000461	OG0000461	OG0000461	OG0000461	NA	NA
OG0000462	OG0000462	OG0000462	OG0000462	OG0000462	OG0000462	NA	NA
OG0000463	OG0000463	OG0000463	OG0000463	OG0000463	OG0000463	COG0779	Information Storage And Processing
OG0000464	OG0000464	OG0000464	OG0000464	OG0000464	OG0000464	COG0195	Information Storage And Processing
OG0000465	OG0000465	OG0000465	OG0000465	OG0000465	OG0000465	COG0532	Information Storage And Processing
OG0000466	OG0000466	OG0000466	OG0000466	OG0000466	OG0000466	COG1550	Poorly Characterized
OG0000467	OG0000467	OG0000467	OG0000467	OG0000467	OG0000467	COG0858	Information Storage And Processing
OG0000468	OG0000468	OG0000468	OG0000468	OG0000468	OG0000468	COG0130	Information Storage And Processing
OG0000469	OG0000469	OG0000469	OG0000469	OG0000469	OG0000469	COG0196	Metabolism
OG0000470	OG0000470	OG0000470	OG0000470	OG0000470	OG0000470	COG0455	Cellular Processes And Signaling
OG0000471	OG0000471	OG0000471	OG0000471	OG0000471	OG0000471	NA	NA
OG0000472	OG0000472	OG0000472	OG0000472	OG0000472	OG0000472	COG0184	Information Storage And Processing
OG0000473	OG0000473	OG0000473	OG0000473	OG0000473	OG0000473	COG1185	Information Storage And Processing
OG0000474	OG0000474	OG0000474	OG0000474	OG0000474	OG0000474	COG0612	Poorly Characterized
OG0000475	OG0000475	OG0000475	OG0000475	OG0000475	OG0000475	COG0289	Metabolism
OG0000476	OG0000476	OG0000476	OG0000476	OG0000476	OG0000476	NA	NA
OG0000477	OG0000477	OG0000477	OG0000477	OG0000477	OG0000477	NA	NA
OG0000478	OG0000478	OG0000478	OG0000478	OG0000478	OG0000478	NA	NA
OG0000479	OG0000479	OG0000479	OG0000479	OG0000479	OG0000479	COG1351	Metabolism
OG0000480	OG0000480	OG0000480	OG0000480	OG0000480	OG0000480	COG0329	Metabolism;Cellular Processes And Signaling
OG0000481	OG0000481	OG0000481	OG0000481	OG0000481	OG0000481	COG0595	Information Storage And Processing
OG0000482	OG0000482	OG0000482	OG0000482	OG0000482	OG0000482	COG0399	Cellular Processes And Signaling
OG0000483	OG0000483	OG0000483	OG0000483	OG0000483	OG0000483	COG3604	Information Storage And Processing;Cellular Processes And Signaling
OG0000484	OG0000484	OG0000484	OG0000484	OG0000484	OG0000484	COG2770	Cellular Processes And Signaling
OG0000485	OG0000485	OG0000485	OG0000485	OG0000485	OG0000485	COG3437	Cellular Processes And Signaling
OG0000486	OG0000486	OG0000486	OG0000486	OG0000486	OG0000486	COG1426	Cellular Processes And Signaling
OG0000487	OG0000487	OG0000487	OG0000487	OG0000487	OG0000487	COG0621	Information Storage And Processing
OG0000488	OG0000488	OG0000488	OG0000488	OG0000488	OG0000488	COG0558	Metabolism
OG0000489	OG0000489	OG0000489	OG0000489	OG0000489	OG0000489	COG1546	Metabolism
OG0000490	OG0000490	OG0000490	OG0000490	OG0000490	OG0000490	COG1396	Information Storage And Processing
OG0000491	OG0000491	OG0000491	OG0000491	OG0000491	OG0000491	COG1028	Metabolism
OG0000492	OG0000492	OG0000492	OG0000492	OG0000492	OG0000492	COG0266	Information Storage And Processing
OG0000493	OG0000493	OG0000493	OG0000493	OG0000493	OG0000493	COG1201	Information Storage And Processing
OG0000494	OG0000494	OG0000494	OG0000494	OG0000494	OG0000494	COG2207	Information Storage And Processing
OG0000495	OG0000495	OG0000495	OG0000495	OG0000495	OG0000495	NA	NA
OG0000496	OG0000496	OG0000496	OG0000496	OG0000496	OG0000496	NA	NA
OG0000497	OG0000497	OG0000497	OG0000497	OG0000497	OG0000497	NA	NA
OG0000498	OG0000498	OG0000498	OG0000498	OG0000498	OG0000498	COG0468	Information Storage And Processing
OG0000499	OG0000499	OG0000499	OG0000499	OG0000499	OG0000499	COG2137	Cellular Processes And Signaling
OG0000500	OG0000500	OG0000500	OG0000500	OG0000500	OG0000500	NA	NA
OG0000501	OG0000501	OG0000501	OG0000501	OG0000501	OG0000501	COG0654	Metabolism
OG0000502	OG0000502	OG0000502	OG0000502	OG0000502	OG0000502	COG0765	Metabolism
OG0000503	OG0000503	OG0000503	OG0000503	OG0000503	OG0000503	COG0834	Cellular Processes And Signaling;Metabolism
OG0000504	OG0000504	OG0000504	OG0000504	OG0000504	OG0000504	COG1126	Metabolism
OG0000505	OG0000505	OG0000505	OG0000505	OG0000505	OG0000505	COG0745	Cellular Processes And Signaling;Information Storage And Processing
OG0000506	OG0000506	OG0000506	OG0000506	OG0000506	OG0000506	COG5002	Cellular Processes And Signaling
OG0000507	OG0000507	OG0000507	OG0000507	OG0000507	OG0000507	COG2358	Poorly Characterized
OG0000508	OG0000508	OG0000508	OG0000508	OG0000508	OG0000508	COG0621	Information Storage And Processing
OG0000509	OG0000509	OG0000509	OG0000509	OG0000509	OG0000509	NA	NA
OG0000510	OG0000510	OG0000510	OG0000510	OG0000510	OG0000510	NA	NA
OG0000511	OG0000511	OG0000511	OG0000511	OG0000511	OG0000511	NA	NA
OG0000512	OG0000512	OG0000512	OG0000512	OG0000512	OG0000512	NA	NA
OG0000513	OG0000513	OG0000513	OG0000513	OG0000513	OG0000513	COG0324	Information Storage And Processing
OG0000514	OG0000514	OG0000514	OG0000514	OG0000514	OG0000514	NA	NA
OG0000515	OG0000515	OG0000515	OG0000515	OG0000515	OG0000515	COG0253	Metabolism
OG0000516	OG0000516	OG0000516	OG0000516	OG0000516	OG0000516	COG0317	Information Storage And Processing;Cellular Processes And Signaling
OG0000517	OG0000517	OG0000517	OG0000517	OG0000517	OG0000517	COG0308	Metabolism
OG0000518	OG0000518	OG0000518	OG0000518	OG0000518	OG0000518	COG2262	Information Storage And Processing
OG0000519	OG0000519	OG0000519	OG0000519	OG0000519	OG0000519	COG3591	Cellular Processes And Signaling
OG0000520	OG0000520	OG0000520	OG0000520	OG0000520	OG0000520	COG0160	Metabolism
OG0000521	OG0000521	OG0000521	OG0000521	OG0000521	OG0000521	COG1670	Information Storage And Processing;Cellular Processes And Signaling
OG0000522	OG0000522	OG0000522	OG0000522	OG0000522	OG0000522	COG1974	Cellular Processes And Signaling;Information Storage And Processing
OG0000523	OG0000523	OG0000523	OG0000523	OG0000523	OG0000523	COG2310	Cellular Processes And Signaling
OG0000524	OG0000524	OG0000524	OG0000524	OG0000524	OG0000524	NA	NA
OG0000525	OG0000525	OG0000525	OG0000525	OG0000525	OG0000525	COG0406	Metabolism
OG0000526	OG0000526	OG0000526	OG0000526	OG0000526	OG0000526	COG1397	Cellular Processes And Signaling
OG0000527	OG0000527	OG0000527	OG0000527	OG0000527	OG0000527	COG0477	Poorly Characterized;Metabolism
OG0000528	OG0000528	OG0000528	OG0000528	OG0000528	OG0000528	COG1309	Information Storage And Processing
OG0000529	OG0000529	OG0000529	OG0000529	OG0000529	OG0000529	COG0164	Information Storage And Processing
OG0000530	OG0000530	OG0000530	OG0000530	OG0000530	OG0000530	NA	NA
OG0000531	OG0000531	OG0000531	OG0000531	OG0000531	OG0000531	NA	NA
OG0000532	OG0000532	OG0000532	OG0000532	OG0000532	OG0000532	COG1040	Poorly Characterized
OG0000533	OG0000533	OG0000533	OG0000533	OG0000533	OG0000533	NA	NA
OG0000534	OG0000534	OG0000534	OG0000534	OG0000534	OG0000534	COG4111	Poorly Characterized
OG0000535	OG0000535	OG0000535	OG0000535	OG0000535	OG0000535	COG4555	Metabolism
OG0000536	OG0000536	OG0000536	OG0000536	OG0000536	OG0000536	COG2186	Information Storage And Processing
OG0000537	OG0000537	OG0000537	OG0000537	OG0000537	OG0000537	COG0568	Information Storage And Processing
OG0000538	OG0000538	OG0000538	OG0000538	OG0000538	OG0000538	COG5640	Cellular Processes And Signaling
OG0000539	OG0000539	OG0000539	OG0000539	OG0000539	OG0000539	COG0187	Information Storage And Processing
OG0000540	OG0000540	OG0000540	OG0000540	OG0000540	OG0000540	COG3162	Poorly Characterized
OG0000541	OG0000541	OG0000541	OG0000541	OG0000541	OG0000541	COG4147	Metabolism
OG0000542	OG0000542	OG0000542	OG0000542	OG0000542	OG0000542	COG4565	Cellular Processes And Signaling;Information Storage And Processing
OG0000543	OG0000543	OG0000543	OG0000543	OG0000543	OG0000543	COG4565	Information Storage And Processing;Cellular Processes And Signaling
OG0000544	OG0000544	OG0000544	OG0000544	OG0000544	OG0000544	COG3290	Cellular Processes And Signaling
OG0000545	OG0000545	OG0000545	OG0000545	OG0000545	OG0000545	COG4759	Poorly Characterized
OG0000546	OG0000546	OG0000546			OG0000546	NA	NA
OG0000547	OG0000547	OG0000547	OG0000547	OG0000547	OG0000547	COG0662	Metabolism
OG0000548	OG0000548	OG0000548	OG0000548	OG0000548	OG0000548	COG0523	Poorly Characterized
OG0000549	OG0000549	OG0000549	OG0000549	OG0000549	OG0000549	COG0188	Information Storage And Processing
OG0000550	OG0000550	OG0000550	OG0000550	OG0000550	OG0000550	COG0612	Poorly Characterized
OG0000551	OG0000551	OG0000551	OG0000551	OG0000551	OG0000551	COG0612	Poorly Characterized
OG0000552	OG0000552	OG0000552	OG0000552	OG0000552	OG0000552	COG0739	Cellular Processes And Signaling
OG0000553	OG0000553	OG0000553	OG0000553	OG0000553	OG0000553	COG1802	Information Storage And Processing
OG0000554	OG0000554	OG0000554	OG0000554	OG0000554	OG0000554	COG1925	Cellular Processes And Signaling;Metabolism
OG0000555	OG0000555	OG0000555	OG0000555	OG0000555	OG0000555	NA	NA
OG0000556	OG0000556	OG0000556	OG0000556	OG0000556	OG0000556	COG1524	Cellular Processes And Signaling
OG0000557	OG0000557	OG0000557	OG0000557	OG0000557	OG0000557	COG1435	Metabolism
OG0000558	OG0000558	OG0000558	OG0000558	OG0000558	OG0000558	NA	NA
OG0000559	OG0000559	OG0000559	OG0000559	OG0000559	OG0000559	COG3324	Poorly Characterized
OG0000560	OG0000560	OG0000560	OG0000560	OG0000560	OG0000560	NA	NA
OG0000561	OG0000561	OG0000561	OG0000561	OG0000561	OG0000561	COG0277	Metabolism
OG0000562	OG0000562	OG0000562	OG0000562	OG0000562	OG0000562	COG2814	Metabolism
OG0000563	OG0000563	OG0000563	OG0000563	OG0000563	OG0000563	COG0276	Metabolism
OG0000564	OG0000564	OG0000564	OG0000564	OG0000564	OG0000564	NA	NA
OG0000565	OG0000565	OG0000565	OG0000565	OG0000565	OG0000565	COG0745	Cellular Processes And Signaling;Information Storage And Processing
OG0000566	OG0000566	OG0000566	OG0000566	OG0000566	OG0000566	COG5002	Cellular Processes And Signaling
OG0000567	OG0000567	OG0000567	OG0000567	OG0000567	OG0000567	NA	NA
OG0000568	OG0000568	OG0000568	OG0000568	OG0000568	OG0000568	NA	NA
OG0000569	OG0000569	OG0000569	OG0000569	OG0000569	OG0000569	NA	NA
OG0000570	OG0000570	OG0000570	OG0000570	OG0000570	OG0000570	COG2050	Metabolism
OG0000571	OG0000571	OG0000571	OG0000571	OG0000571	OG0000571	COG0756	Metabolism;Cellular Processes And Signaling
OG0000572	OG0000572	OG0000572	OG0000572	OG0000572	OG0000572	NA	NA
OG0000573	OG0000573	OG0000573	OG0000573	OG0000573	OG0000573	NA	NA
OG0000574	OG0000574	OG0000574	OG0000574	OG0000574	OG0000574	COG0569	Cellular Processes And Signaling;Metabolism
OG0000575	OG0000575	OG0000575	OG0000575	OG0000575	OG0000575	COG0569	Cellular Processes And Signaling;Metabolism
OG0000576	OG0000576	OG0000576	OG0000576	OG0000576	OG0000576	COG0531	Metabolism
OG0000577	OG0000577	OG0000577	OG0000577	OG0000577	OG0000577	COG2265	Information Storage And Processing
OG0000578	OG0000578	OG0000578	OG0000578	OG0000578	OG0000578	NA	NA
OG0000579	OG0000579	OG0000579	OG0000579	OG0000579	OG0000579	COG1090	Poorly Characterized
OG0000580	OG0000580	OG0000580	OG0000580	OG0000580	OG0000580	NA	NA
OG0000581	OG0000581	OG0000581	OG0000581	OG0000581	OG0000581	NA	NA
OG0000582	OG0000582	OG0000582	OG0000582	OG0000582	OG0000582	COG3383	Poorly Characterized
OG0000583	OG0000583	OG0000583	OG0000583	OG0000583	OG0000583	COG1799	Cellular Processes And Signaling
OG0000584	OG0000584	OG0000584	OG0000584	OG0000584	OG0000584	NA	NA
OG0000585	OG0000585	OG0000585	OG0000585	OG0000585	OG0000585	COG1694	Cellular Processes And Signaling
OG0000586	OG0000586	OG0000586	OG0000586	OG0000586	OG0000586	NA	NA
OG0000587	OG0000587	OG0000587	OG0000587	OG0000587	OG0000587	COG2141	Poorly Characterized;Metabolism
OG0000588	OG0000588	OG0000588	OG0000588	OG0000588	OG0000588	COG0439	Metabolism
OG0000589	OG0000589	OG0000589	OG0000589	OG0000589	OG0000589	NA	NA
OG0000590	OG0000590	OG0000590	OG0000590	OG0000590	OG0000590	COG0031	Metabolism
OG0000591	OG0000591	OG0000591	OG0000591	OG0000591	OG0000591	COG2814	Metabolism
OG0000592	OG0000592	OG0000592	OG0000592	OG0000592	OG0000592	COG2227	Metabolism
OG0000593	OG0000593	OG0000593	OG0000593	OG0000593	OG0000593	COG0747	Metabolism
OG0000594	OG0000594	OG0000594	OG0000594	OG0000594	OG0000594	COG0601	Metabolism
OG0000595	OG0000595	OG0000595	OG0000595	OG0000595	OG0000595	COG1173	Metabolism
OG0000596	OG0000596	OG0000596	OG0000596	OG0000596	OG0000596	COG1123	Cellular Processes And Signaling
OG0000597	OG0000597	OG0000597	OG0000597	OG0000597	OG0000597	COG2890	Information Storage And Processing
OG0000598	OG0000598	OG0000598	OG0000598	OG0000598	OG0000598	COG4639	Poorly Characterized
OG0000599	OG0000599	OG0000599		OG0000599	OG0000599	COG0061	Metabolism
OG0000600	OG0000600	OG0000600	OG0000600	OG0000600	OG0000600	COG0330	Cellular Processes And Signaling
OG0000601	OG0000601	OG0000601	OG0000601	OG0000601	OG0000601	COG2235	Metabolism
OG0000602	OG0000602	OG0000602	OG0000602	OG0000602	OG0000602	COG0078	Metabolism
OG0000603	OG0000603	OG0000603	OG0000603	OG0000603	OG0000603	COG2172	Cellular Processes And Signaling
OG0000604	OG0000604	OG0000604	OG0000604	OG0000604	OG0000604	COG1024	Metabolism
OG0000605	OG0000605	OG0000605	OG0000605	OG0000605	OG0000605	COG1902	Metabolism
OG0000606	OG0000606	OG0000606	OG0000606	OG0000606	OG0000606	COG0529	Metabolism
OG0000607	OG0000607	OG0000607	OG0000607	OG0000607	OG0000607	COG3327	Information Storage And Processing
OG0000608	OG0000608	OG0000608	OG0000608	OG0000608	OG0000608	COG0365	Metabolism
OG0000609	OG0000609	OG0000609	OG0000609	OG0000609	OG0000609	COG1960	Metabolism
OG0000610	OG0000610	OG0000610	OG0000610	OG0000610	OG0000610	COG0251	Cellular Processes And Signaling
OG0000611	OG0000611	OG0000611	OG0000611	OG0000611	OG0000611	NA	NA
OG0000612	OG0000612	OG0000612	OG0000612	OG0000612	OG0000612	NA	NA
OG0000613	OG0000613	OG0000613	OG0000613	OG0000613	OG0000613	COG0665	Metabolism
OG0000614	OG0000614	OG0000614	OG0000614	OG0000614	OG0000614	COG3383	Poorly Characterized
OG0000615	OG0000615	OG0000615	OG0000615	OG0000615	OG0000615	COG1249	Metabolism
OG0000616	OG0000616	OG0000616	OG0000616	OG0000616	OG0000616	COG0329	Cellular Processes And Signaling;Metabolism
OG0000617	OG0000617	OG0000617	OG0000617	OG0000617	OG0000617	COG3938	Metabolism
OG0000618	OG0000618	OG0000618	OG0000618	OG0000618	OG0000618	COG1802	Information Storage And Processing
OG0000619	OG0000619	OG0000619	OG0000619		OG0000619	COG2814	Metabolism
OG0000620	OG0000620	OG0000620		OG0000620	OG0000620	COG0609	Metabolism
OG0000621	OG0000621	OG0000621	OG0000621	OG0000621	OG0000621	COG1396	Information Storage And Processing
OG0000622	OG0000622	OG0000622	OG0000622	OG0000622	OG0000622	COG1048	Metabolism
OG0000623	OG0000623	OG0000623	OG0000623	OG0000623	OG0000623	COG0642	Cellular Processes And Signaling
OG0000624	OG0000624	OG0000624	OG0000624	OG0000624	OG0000624	COG3537	Metabolism
OG0000625	OG0000625	OG0000625	OG0000625	OG0000625	OG0000625	COG1653	Metabolism
OG0000626	OG0000626	OG0000626	OG0000626	OG0000626	OG0000626	COG1175	Metabolism
OG0000627	OG0000627	OG0000627	OG0000627	OG0000627	OG0000627	COG0395	Metabolism
OG0000628	OG0000628	OG0000628	OG0000628	OG0000628	OG0000628	COG1940	Information Storage And Processing;Metabolism
OG0000629	OG0000629	OG0000629	OG0000629	OG0000629	OG0000629	COG4213	Metabolism
OG0000630	OG0000630	OG0000630	OG0000630	OG0000630	OG0000630	COG1129	Metabolism
OG0000631	OG0000631	OG0000631	OG0000631	OG0000631	OG0000631	COG4214	Metabolism
OG0000632	OG0000632	OG0000632	OG0000632	OG0000632	OG0000632	COG1154	Metabolism
OG0000633	OG0000633	OG0000633	OG0000633	OG0000633	OG0000633	COG0531	Metabolism
OG0000634	OG0000634	OG0000634	OG0000634	OG0000634	OG0000634	NA	NA
OG0000635	OG0000635	OG0000635	OG0000635	OG0000635	OG0000635	COG1250	Metabolism
OG0000636	OG0000636	OG0000636	OG0000636	OG0000636	OG0000636	COG0183	Metabolism
OG0000637	OG0000637	OG0000637	OG0000637	OG0000637	OG0000637	COG1609	Information Storage And Processing
OG0000638	OG0000638	OG0000638	OG0000638	OG0000638	OG0000638	COG1175	Metabolism
OG0000639	OG0000639	OG0000639	OG0000639	OG0000639	OG0000639	COG0395	Metabolism
OG0000640	OG0000640	OG0000640	OG0000640	OG0000640	OG0000640	COG0349	Information Storage And Processing
OG0000641	OG0000641	OG0000641	OG0000641	OG0000641	OG0000641	COG2197	Cellular Processes And Signaling;Information Storage And Processing
OG0000642	OG0000642	OG0000642	OG0000642	OG0000642	OG0000642	COG0407	Metabolism
OG0000643	OG0000643	OG0000643	OG0000643	OG0000643	OG0000643	COG0705	Cellular Processes And Signaling
OG0000644	OG0000644	OG0000644	OG0000644	OG0000644	OG0000644	NA	NA
OG0000645	OG0000645	OG0000645	OG0000645	OG0000645	OG0000645	COG0446	Metabolism
OG0000646	OG0000646	OG0000646	OG0000646	OG0000646	OG0000646	NA	NA
OG0000647	OG0000647	OG0000647	OG0000647	OG0000647	OG0000647	COG1232	Metabolism
OG0000648	OG0000648	OG0000648	OG0000648	OG0000648	OG0000648	COG3253	Metabolism
OG0000649	OG0000649	OG0000649	OG0000649	OG0000649	OG0000649	COG0596	Metabolism;Poorly Characterized
OG0000650	OG0000650	OG0000650	OG0000650	OG0000650	OG0000650	NA	NA
OG0000651	OG0000651	OG0000651	OG0000651	OG0000651	OG0000651	COG3652	Poorly Characterized
OG0000652	OG0000652	OG0000652	OG0000652	OG0000652	OG0000652	COG3220	Poorly Characterized
OG0000653	OG0000653	OG0000653	OG0000653	OG0000653	OG0000653	COG3652	Poorly Characterized
OG0000654	OG0000654	OG0000654	OG0000654	OG0000654	OG0000654	COG3652	Poorly Characterized
OG0000655	OG0000655	OG0000655	OG0000655	OG0000655	OG0000655	COG1990	Information Storage And Processing
OG0000656	OG0000656	OG0000656	OG0000656	OG0000656	OG0000656	COG0726	Cellular Processes And Signaling;Metabolism
OG0000657	OG0000657		OG0000657	OG0000657	OG0000657	COG0330	Cellular Processes And Signaling
OG0000658	OG0000658	OG0000658	OG0000658	OG0000658	OG0000658	COG0659	Metabolism
OG0000659	OG0000659	OG0000659	OG0000659	OG0000659	OG0000659	COG0288	Metabolism
OG0000660	OG0000660	OG0000660	OG0000660	OG0000660	OG0000660	NA	NA
OG0000661	OG0000661	OG0000661	OG0000661	OG0000661	OG0000661	COG1485	Cellular Processes And Signaling
OG0000662	OG0000662	OG0000662	OG0000662	OG0000662	OG0000662	COG1985	Metabolism
OG0000663	OG0000663	OG0000663	OG0000663	OG0000663	OG0000663	NA	NA
OG0000664	OG0000664	OG0000664	OG0000664	OG0000664	OG0000664	COG0773	Cellular Processes And Signaling
OG0000665	OG0000665	OG0000665	OG0000665	OG0000665	OG0000665	COG0229	Cellular Processes And Signaling
OG0000666	OG0000666	OG0000666	OG0000666	OG0000666	OG0000666	NA	NA
OG0000667	OG0000667	OG0000667	OG0000667		OG0000667	COG1874	Metabolism
OG0000668	OG0000668	OG0000668	OG0000668	OG0000668	OG0000668	COG2229	Cellular Processes And Signaling
OG0000669	OG0000669	OG0000669	OG0000669	OG0000669	OG0000669	NA	NA
OG0000670	OG0000670	OG0000670	OG0000670	OG0000670	OG0000670	COG2018	Cellular Processes And Signaling
OG0000671	OG0000671	OG0000671	OG0000671	OG0000671	OG0000671	COG0642	Cellular Processes And Signaling
OG0000672	OG0000672	OG0000672	OG0000672	OG0000672	OG0000672	COG1879	Metabolism
OG0000673	OG0000673	OG0000673	OG0000673	OG0000673	OG0000673	COG3315	Metabolism
OG0000674	OG0000674	OG0000674	OG0000674	OG0000674	OG0000674	NA	NA
OG0000675	OG0000675	OG0000675	OG0000675	OG0000675	OG0000675	COG1396	Information Storage And Processing
OG0000676	OG0000676	OG0000676	OG0000676	OG0000676	OG0000676	COG1874	Metabolism
OG0000677	OG0000677	OG0000677	OG0000677	OG0000677	OG0000677	COG1874	Metabolism
OG0000678	OG0000678	OG0000678	OG0000678	OG0000678	OG0000678	COG1609	Information Storage And Processing
OG0000679	OG0000679	OG0000679	OG0000679	OG0000679	OG0000679	COG0640	Information Storage And Processing
OG0000680	OG0000680	OG0000680	OG0000680	OG0000680	OG0000680	COG1316	Cellular Processes And Signaling
OG0000681	OG0000681	OG0000681	OG0000681	OG0000681	OG0000681	COG3340	Metabolism
OG0000682	OG0000682	OG0000682	OG0000682	OG0000682	OG0000682	NA	NA
OG0000683	OG0000683	OG0000683	OG0000683	OG0000683	OG0000683	NA	NA
OG0000684	OG0000684	OG0000684	OG0000684	OG0000684	OG0000684	NA	NA
OG0000685	OG0000685	OG0000685	OG0000685	OG0000685	OG0000685	COG4935	Cellular Processes And Signaling
OG0000686	OG0000686	OG0000686	OG0000686	OG0000686	OG0000686	COG1309	Information Storage And Processing
OG0000687	OG0000687	OG0000687	OG0000687	OG0000687	OG0000687	NA	NA
OG0000688	OG0000688	OG0000688	OG0000688	OG0000688	OG0000688	COG1309	Information Storage And Processing
OG0000689	OG0000689	OG0000689	OG0000689	OG0000689	OG0000689	COG1578	Cellular Processes And Signaling
OG0000690	OG0000690	OG0000690	OG0000690	OG0000690	OG0000690	NA	NA
OG0000691	OG0000691	OG0000691	OG0000691	OG0000691	OG0000691	COG0006	Metabolism
OG0000692	OG0000692	OG0000692	OG0000692	OG0000692	OG0000692	COG3173	Poorly Characterized
OG0000693	OG0000693	OG0000693	OG0000693	OG0000693	OG0000693	COG0296	Metabolism
OG0000694	OG0000694	OG0000694	OG0000694	OG0000694	OG0000694	COG1716	Cellular Processes And Signaling
OG0000695	OG0000695	OG0000695	OG0000695	OG0000695	OG0000695	NA	NA
OG0000696	OG0000696	OG0000696	OG0000696	OG0000696	OG0000696	NA	NA
OG0000697	OG0000697	OG0000697	OG0000697	OG0000697	OG0000697	NA	NA
OG0000698	OG0000698	OG0000698	OG0000698	OG0000698	OG0000698	COG3280	Metabolism
OG0000699	OG0000699	OG0000699	OG0000699	OG0000699	OG0000699	COG1523	Metabolism
OG0000700	OG0000700	OG0000700	OG0000700	OG0000700	OG0000700	NA	NA
OG0000701	OG0000701	OG0000701	OG0000701	OG0000701	OG0000701	NA	NA
OG0000702	OG0000702	OG0000702	OG0000702	OG0000702	OG0000702	NA	NA
OG0000703	OG0000703	OG0000703	OG0000703	OG0000703	OG0000703	COG0847	Information Storage And Processing
OG0000704	OG0000704	OG0000704	OG0000704	OG0000704	OG0000704	COG0697	Metabolism;Poorly Characterized
OG0000705	OG0000705	OG0000705	OG0000705	OG0000705	OG0000705	COG0583	Information Storage And Processing
OG0000706	OG0000706	OG0000706	OG0000706	OG0000706	OG0000706	COG2334	Cellular Processes And Signaling
OG0000707	OG0000707	OG0000707	OG0000707	OG0000707	OG0000707	COG1175	Metabolism
OG0000708	OG0000708	OG0000708	OG0000708	OG0000708	OG0000708	COG1653	Metabolism
OG0000709	OG0000709	OG0000709	OG0000709	OG0000709	OG0000709	COG2409	Poorly Characterized
OG0000710	OG0000710	OG0000710	OG0000710	OG0000710	OG0000710	COG3797	Poorly Characterized
OG0000711	OG0000711	OG0000711	OG0000711	OG0000711	OG0000711	COG2138	Metabolism
OG0000712	OG0000712	OG0000712	OG0000712	OG0000712	OG0000712	COG0600	Metabolism
OG0000713	OG0000713	OG0000713	OG0000713	OG0000713	OG0000713	COG1116	Metabolism
OG0000714	OG0000714	OG0000714	OG0000714	OG0000714	OG0000714	COG0715	Metabolism
OG0000715	OG0000715	OG0000715	OG0000715	OG0000715	OG0000715	NA	NA
OG0000716	OG0000716	OG0000716	OG0000716	OG0000716	OG0000716	COG2895	Metabolism
OG0000717	OG0000717	OG0000717	OG0000717	OG0000717	OG0000717	COG0529	Metabolism
OG0000718	OG0000718	OG0000718	OG0000718	OG0000718	OG0000718	COG0175	Metabolism
OG0000719	OG0000719	OG0000719	OG0000719	OG0000719	OG0000719	COG1997	Information Storage And Processing
OG0000720	OG0000720	OG0000720	OG0000720	OG0000720	OG0000720	COG0155	Metabolism
OG0000721	OG0000721	OG0000721	OG0000721	OG0000721	OG0000721	COG0456	Information Storage And Processing
OG0000722	OG0000722	OG0000722	OG0000722	OG0000722	OG0000722	NA	NA
OG0000723	OG0000723	OG0000723	OG0000723	OG0000723	OG0000723	COG3284	Information Storage And Processing
OG0000724	OG0000724	OG0000724	OG0000724	OG0000724	OG0000724	COG1960	Metabolism
OG0000725	OG0000725	OG0000725	OG0000725	OG0000725	OG0000725	COG0031	Metabolism
OG0000726	OG0000726	OG0000726	OG0000726	OG0000726	OG0000726	COG2423	Metabolism
OG0000727	OG0000727	OG0000727	OG0000727	OG0000727	OG0000727	COG2175	Metabolism
OG0000728	OG0000728	OG0000728	OG0000728	OG0000728	OG0000728	COG3208	Metabolism
OG0000729	OG0000729	OG0000729	OG0000729	OG0000729	OG0000729	COG1045	Metabolism
OG0000730	OG0000730	OG0000730	OG0000730	OG0000730	OG0000730	NA	NA
OG0000731	OG0000731	OG0000731	OG0000731	OG0000731	OG0000731	COG1295	Poorly Characterized
OG0000732	OG0000732	OG0000732	OG0000732	OG0000732	OG0000732	COG2207	Information Storage And Processing
OG0000733	OG0000733	OG0000733	OG0000733	OG0000733	OG0000733	COG0346	Metabolism
OG0000734	OG0000734	OG0000734	OG0000734	OG0000734	OG0000734	NA	NA
OG0000735	OG0000735		OG0000735	OG0000735	OG0000735	NA	NA
OG0000736	OG0000736	OG0000736	OG0000736	OG0000736	OG0000736	COG2040	Metabolism
OG0000737	OG0000737	OG0000737	OG0000737	OG0000737	OG0000737	NA	NA
OG0000738	OG0000738	OG0000738	OG0000738	OG0000738	OG0000738	NA	NA
OG0000739	OG0000739	OG0000739	OG0000739	OG0000739	OG0000739	NA	NA
OG0000740	OG0000740	OG0000740	OG0000740	OG0000740	OG0000740	COG3940	Metabolism
OG0000741	OG0000741	OG0000741	OG0000741	OG0000741	OG0000741	COG3507	Metabolism
OG0000742	OG0000742	OG0000742	OG0000742	OG0000742	OG0000742	NA	NA
OG0000743	OG0000743	OG0000743	OG0000743	OG0000743	OG0000743	COG2755	Cellular Processes And Signaling;Metabolism
OG0000744	OG0000744	OG0000744	OG0000744	OG0000744	OG0000744	COG3568	Poorly Characterized
OG0000745	OG0000745	OG0000745	OG0000745	OG0000745	OG0000745	COG3694	Poorly Characterized
OG0000746	OG0000746	OG0000746	OG0000746	OG0000746	OG0000746	COG4587	Poorly Characterized
OG0000747	OG0000747	OG0000747	OG0000747	OG0000747	OG0000747	COG4586	Poorly Characterized
OG0000748	OG0000748	OG0000748	OG0000748	OG0000748	OG0000748	COG3250	Metabolism
OG0000749	OG0000749	OG0000749	OG0000749	OG0000749	OG0000749	COG0395	Metabolism
OG0000750	OG0000750	OG0000750	OG0000750	OG0000750	OG0000750	COG1175	Metabolism
OG0000751	OG0000751	OG0000751	OG0000751	OG0000751	OG0000751	NA	NA
OG0000752	OG0000752	OG0000752	OG0000752	OG0000752	OG0000752	COG1940	Metabolism;Information Storage And Processing
OG0000753	OG0000753	OG0000753	OG0000753	OG0000753	OG0000753	COG0277	Metabolism
OG0000754	OG0000754	OG0000754	OG0000754	OG0000754	OG0000754	NA	NA
OG0000755	OG0000755	OG0000755	OG0000755	OG0000755	OG0000755	COG0362	Metabolism
OG0000756	OG0000756	OG0000756	OG0000756	OG0000756	OG0000756	COG1162	Information Storage And Processing
OG0000757	OG0000757	OG0000757		OG0000757	OG0000757	COG3467	Cellular Processes And Signaling
OG0000758	OG0000758	OG0000758	OG0000758	OG0000758	OG0000758	COG2755	Cellular Processes And Signaling;Metabolism
OG0000759	OG0000759	OG0000759	OG0000759	OG0000759	OG0000759	NA	NA
OG0000760	OG0000760	OG0000760	OG0000760	OG0000760	OG0000760	NA	NA
OG0000761	OG0000761	OG0000761	OG0000761	OG0000761	OG0000761	NA	NA
OG0000762	OG0000762	OG0000762	OG0000762	OG0000762	OG0000762	NA	NA
OG0000763	OG0000763	OG0000763	OG0000763	OG0000763	OG0000763	NA	NA
OG0000764	OG0000764	OG0000764	OG0000764	OG0000764	OG0000764	NA	NA
OG0000765	OG0000765	OG0000765	OG0000765	OG0000765	OG0000765	COG1802	Information Storage And Processing
OG0000766	OG0000766	OG0000766	OG0000766	OG0000766	OG0000766	NA	NA
OG0000767	OG0000767	OG0000767	OG0000767	OG0000767	OG0000767	COG2508	Information Storage And Processing
OG0000768	OG0000768	OG0000768	OG0000768	OG0000768	OG0000768	COG1319	Metabolism
OG0000769	OG0000769	OG0000769	OG0000769	OG0000769	OG0000769	COG2080	Metabolism
OG0000770	OG0000770	OG0000770	OG0000770	OG0000770	OG0000770	COG1529	Metabolism
OG0000771	OG0000771	OG0000771	OG0000771	OG0000771	OG0000771	COG2252	Metabolism
OG0000772	OG0000772	OG0000772	OG0000772	OG0000772	OG0000772	COG1975	Cellular Processes And Signaling
OG0000773	OG0000773	OG0000773	OG0000773	OG0000773	OG0000773	COG3427	Metabolism
OG0000774	OG0000774	OG0000774	OG0000774	OG0000774	OG0000774	COG2124	Cellular Processes And Signaling;Metabolism
OG0000775	OG0000775	OG0000775	OG0000775	OG0000775	OG0000775	COG0673	Poorly Characterized
OG0000776	OG0000776	OG0000776	OG0000776	OG0000776	OG0000776	COG1376	Cellular Processes And Signaling
OG0000777	OG0000777	OG0000777	OG0000777	OG0000777	OG0000777	COG2837	Metabolism
OG0000778	OG0000778	OG0000778	OG0000778	OG0000778	OG0000778	COG2124	Cellular Processes And Signaling;Metabolism
OG0000779	OG0000779	OG0000779	OG0000779	OG0000779	OG0000779	COG2099	Metabolism
OG0000780	OG0000780	OG0000780	OG0000780	OG0000780	OG0000780	NA	NA
OG0000781	OG0000781	OG0000781	OG0000781	OG0000781	OG0000781	COG5640	Cellular Processes And Signaling
OG0000782	OG0000782	OG0000782	OG0000782	OG0000782	OG0000782	COG0365	Metabolism
OG0000783	OG0000783	OG0000783	OG0000783	OG0000783	OG0000783	COG3960	Metabolism
OG0000784	OG0000784	OG0000784	OG0000784	OG0000784	OG0000784	COG0011	Metabolism
OG0000785	OG0000785	OG0000785	OG0000785	OG0000785	OG0000785	COG2964	Information Storage And Processing
OG0000786	OG0000786	OG0000786	OG0000786	OG0000786	OG0000786	COG3195	Metabolism
OG0000787	OG0000787	OG0000787	OG0000787	OG0000787	OG0000787	COG2351	Metabolism
OG0000788	OG0000788	OG0000788	OG0000788	OG0000788	OG0000788	COG3648	Metabolism
OG0000789	OG0000789	OG0000789	OG0000789	OG0000789	OG0000789	COG0402	Poorly Characterized;Metabolism
OG0000790	OG0000790	OG0000790	OG0000790	OG0000790	OG0000790	NA	NA
OG0000791	OG0000791	OG0000791	OG0000791	OG0000791	OG0000791	NA	NA
OG0000792	OG0000792	OG0000792	OG0000792	OG0000792	OG0000792	COG0436	Metabolism
OG0000793	OG0000793	OG0000793	OG0000793	OG0000793	OG0000793	COG1733	Information Storage And Processing
OG0000794	OG0000794	OG0000794	OG0000794	OG0000794	OG0000794	NA	NA
OG0000795	OG0000795	OG0000795	OG0000795	OG0000795	OG0000795	COG1240	Metabolism
OG0000796	OG0000796	OG0000796	OG0000796	OG0000796	OG0000796	COG4264	Metabolism
OG0000797	OG0000797	OG0000797	OG0000797	OG0000797	OG0000797	NA	NA
OG0000798	OG0000798	OG0000798	OG0000798	OG0000798	OG0000798	NA	NA
OG0000799	OG0000799	OG0000799	OG0000799	OG0000799	OG0000799	COG3526	Poorly Characterized
OG0000800	OG0000800	OG0000800	OG0000800	OG0000800	OG0000800	COG2225	Metabolism
OG0000801	OG0000801	OG0000801	OG0000801	OG0000801	OG0000801	COG2068	Metabolism
OG0000802	OG0000802	OG0000802	OG0000802	OG0000802	OG0000802	NA	NA
OG0000803	OG0000803	OG0000803	OG0000803	OG0000803	OG0000803	COG1414	Information Storage And Processing
OG0000804	OG0000804	OG0000804	OG0000804	OG0000804	OG0000804	COG0044	Metabolism
OG0000805	OG0000805	OG0000805	OG0000805	OG0000805	OG0000805	COG4266	Metabolism
OG0000806	OG0000806	OG0000806	OG0000806	OG0000806	OG0000806	COG4585	Cellular Processes And Signaling
OG0000807	OG0000807	OG0000807	OG0000807	OG0000807	OG0000807	COG0667	Poorly Characterized;Metabolism
OG0000808	OG0000808	OG0000808	OG0000808	OG0000808	OG0000808	COG2197	Information Storage And Processing;Cellular Processes And Signaling
OG0000809	OG0000809	OG0000809	OG0000809	OG0000809	OG0000809	COG0673	Poorly Characterized
OG0000810	OG0000810	OG0000810	OG0000810	OG0000810	OG0000810	COG1940	Information Storage And Processing;Metabolism
OG0000811	OG0000811	OG0000811	OG0000811	OG0000811	OG0000811	NA	NA
OG0000812	OG0000812	OG0000812	OG0000812	OG0000812	OG0000812	COG0553	Information Storage And Processing
OG0000813	OG0000813	OG0000813	OG0000813	OG0000813	OG0000813	COG0599	Poorly Characterized
OG0000814	OG0000814	OG0000814	OG0000814	OG0000814	OG0000814	COG2220	Metabolism
OG0000815	OG0000815	OG0000815	OG0000815	OG0000815	OG0000815	COG0708	Information Storage And Processing
OG0000816	OG0000816	OG0000816	OG0000816	OG0000816	OG0000816	NA	NA
OG0000817	OG0000817	OG0000817	OG0000817	OG0000817	OG0000817	NA	NA
OG0000818	OG0000818	OG0000818	OG0000818	OG0000818	OG0000818	COG1126	Metabolism
OG0000819	OG0000819	OG0000819	OG0000819	OG0000819	OG0000819	COG0405	Metabolism
OG0000820	OG0000820	OG0000820	OG0000820	OG0000820	OG0000820	COG0024	Information Storage And Processing
OG0000821	OG0000821	OG0000821	OG0000821	OG0000821	OG0000821	COG1396	Information Storage And Processing
OG0000822	OG0000822	OG0000822	OG0000822	OG0000822	OG0000822	NA	NA
OG0000823	OG0000823	OG0000823	OG0000823	OG0000823	OG0000823	COG0388	Metabolism
OG0000824	OG0000824	OG0000824	OG0000824	OG0000824	OG0000824	COG0160	Metabolism
OG0000825	OG0000825	OG0000825	OG0000825	OG0000825	OG0000825	COG2508	Information Storage And Processing
OG0000826	OG0000826	OG0000826	OG0000826	OG0000826	OG0000826	COG0388	Metabolism
OG0000827	OG0000827	OG0000827	OG0000827	OG0000827	OG0000827	COG0044	Metabolism
OG0000828	OG0000828	OG0000828	OG0000828	OG0000828	OG0000828	COG2141	Metabolism;Poorly Characterized
OG0000829	OG0000829	OG0000829	OG0000829	OG0000829	OG0000829	COG1953	Metabolism
OG0000830	OG0000830	OG0000830	OG0000830	OG0000830	OG0000830	NA	NA
OG0000831	OG0000831	OG0000831	OG0000831	OG0000831	OG0000831	COG0405	Metabolism
OG0000832	OG0000832	OG0000832	OG0000832	OG0000832	OG0000832	COG0483	Metabolism
OG0000833	OG0000833	OG0000833	OG0000833	OG0000833	OG0000833	NA	NA
OG0000834	OG0000834	OG0000834	OG0000834	OG0000834	OG0000834	COG1233	Metabolism
OG0000835	OG0000835	OG0000835	OG0000835	OG0000835	OG0000835	COG2110	Information Storage And Processing
OG0000836	OG0000836	OG0000836	OG0000836	OG0000836	OG0000836	COG2217	Metabolism
OG0000837	OG0000837	OG0000837	OG0000837	OG0000837	OG0000837	COG2169	Information Storage And Processing
OG0000838	OG0000838	OG0000838	OG0000838	OG0000838	OG0000838	COG0350	Information Storage And Processing
OG0000839	OG0000839	OG0000839	OG0000839	OG0000839	OG0000839	COG1051	Metabolism
OG0000840	OG0000840	OG0000840	OG0000840	OG0000840	OG0000840	NA	NA
OG0000841	OG0000841	OG0000841	OG0000841	OG0000841	OG0000841	COG1929	Metabolism
OG0000842	OG0000842	OG0000842	OG0000842	OG0000842	OG0000842	COG2508	Information Storage And Processing
OG0000843	OG0000843	OG0000843	OG0000843	OG0000843	OG0000843	COG0410	Metabolism
OG0000844	OG0000844	OG0000844	OG0000844	OG0000844	OG0000844	COG0411	Metabolism
OG0000845	OG0000845	OG0000845	OG0000845	OG0000845	OG0000845	COG0559	Metabolism
OG0000846	OG0000846	OG0000846	OG0000846	OG0000846	OG0000846	COG4177	Metabolism
OG0000847	OG0000847	OG0000847	OG0000847	OG0000847	OG0000847	COG0683	Metabolism
OG0000848	OG0000848	OG0000848	OG0000848	OG0000848	OG0000848	COG1183	Metabolism
OG0000849	OG0000849	OG0000849	OG0000849	OG0000849	OG0000849	COG0688	Metabolism
OG0000850	OG0000850	OG0000850	OG0000850	OG0000850	OG0000850	COG1960	Metabolism
OG0000851	OG0000851	OG0000851	OG0000851	OG0000851	OG0000851	COG2030	Metabolism
OG0000852	OG0000852	OG0000852	OG0000852	OG0000852	OG0000852	COG2301	Metabolism
OG0000853	OG0000853	OG0000853	OG0000853	OG0000853	OG0000853	COG2185	Metabolism
OG0000854	OG0000854	OG0000854	OG0000854	OG0000854	OG0000854	COG0604	Metabolism;Poorly Characterized
OG0000855	OG0000855	OG0000855	OG0000855	OG0000855	OG0000855	COG1309	Information Storage And Processing
OG0000856	OG0000856	OG0000856	OG0000856	OG0000856	OG0000856	COG1250	Metabolism
OG0000857	OG0000857	OG0000857	OG0000857	OG0000857	OG0000857	NA	NA
OG0000858	OG0000858	OG0000858	OG0000858	OG0000858	OG0000858	COG1533	Information Storage And Processing
OG0000859	OG0000859	OG0000859	OG0000859	OG0000859	OG0000859	NA	NA
OG0000860	OG0000860	OG0000860	OG0000860	OG0000860	OG0000860	COG2208	Information Storage And Processing;Cellular Processes And Signaling
OG0000861	OG0000861	OG0000861	OG0000861	OG0000861	OG0000861	NA	NA
OG0000862	OG0000862	OG0000862	OG0000862	OG0000862	OG0000862	COG2362	Metabolism
OG0000863	OG0000863	OG0000863	OG0000863	OG0000863	OG0000863	COG0624	Metabolism
OG0000864	OG0000864	OG0000864	OG0000864	OG0000864	OG0000864	COG1506	Metabolism
OG0000865	OG0000865	OG0000865	OG0000865	OG0000865	OG0000865	COG1619	Cellular Processes And Signaling
OG0000866	OG0000866	OG0000866	OG0000866	OG0000866	OG0000866	NA	NA
OG0000867	OG0000867	OG0000867	OG0000867	OG0000867	OG0000867	COG1670	Information Storage And Processing;Cellular Processes And Signaling
OG0000868	OG0000868	OG0000868	OG0000868	OG0000868	OG0000868	COG1252	Metabolism
OG0000869	OG0000869	OG0000869	OG0000869	OG0000869		COG3285	Information Storage And Processing
OG0000870	OG0000870	OG0000870	OG0000870	OG0000870	OG0000870	NA	NA
OG0000871	OG0000871	OG0000871	OG0000871	OG0000871	OG0000871	COG2226	Metabolism
OG0000872	OG0000872	OG0000872	OG0000872	OG0000872	OG0000872	COG1597	Metabolism;Poorly Characterized
OG0000873	OG0000873	OG0000873	OG0000873	OG0000873	OG0000873	COG0406	Metabolism
OG0000874	OG0000874	OG0000874	OG0000874	OG0000874	OG0000874	COG0488	Poorly Characterized
OG0000875	OG0000875	OG0000875	OG0000875	OG0000875	OG0000875	COG1191	Information Storage And Processing
OG0000876	OG0000876	OG0000876	OG0000876	OG0000876	OG0000876	NA	NA
OG0000877	OG0000877	OG0000877	OG0000877	OG0000877	OG0000877	COG0436	Metabolism
OG0000878	OG0000878	OG0000878	OG0000878	OG0000878	OG0000878	COG2220	Metabolism
OG0000879	OG0000879	OG0000879	OG0000879	OG0000879	OG0000879	COG0586	Cellular Processes And Signaling
OG0000880	OG0000880	OG0000880	OG0000880	OG0000880	OG0000880	COG2220	Metabolism
OG0000881	OG0000881	OG0000881	OG0000881	OG0000881	OG0000881	NA	NA
OG0000882	OG0000882	OG0000882	OG0000882	OG0000882	OG0000882	COG1950	Poorly Characterized
OG0000883	OG0000883	OG0000883	OG0000883	OG0000883	OG0000883	COG1764	Cellular Processes And Signaling
OG0000884	OG0000884	OG0000884	OG0000884	OG0000884	OG0000884	COG1396	Information Storage And Processing
OG0000885	OG0000885	OG0000885	OG0000885	OG0000885	OG0000885	COG2154	Metabolism
OG0000886	OG0000886	OG0000886	OG0000886	OG0000886	OG0000886	COG2226	Metabolism
OG0000887	OG0000887	OG0000887	OG0000887	OG0000887	OG0000887	COG5297	Metabolism
OG0000888	OG0000888	OG0000888	OG0000888	OG0000888	OG0000888	COG5297	Metabolism
OG0000889	OG0000889	OG0000889	OG0000889	OG0000889	OG0000889	COG4106	Metabolism
OG0000890	OG0000890	OG0000890	OG0000890	OG0000890	OG0000890	COG0656	Metabolism
OG0000891	OG0000891	OG0000891	OG0000891	OG0000891	OG0000891	COG1022	Metabolism
OG0000892	OG0000892	OG0000892	OG0000892	OG0000892	OG0000892	COG0583	Information Storage And Processing
OG0000893	OG0000893	OG0000893	OG0000893	OG0000893	OG0000893	COG0385	Poorly Characterized
OG0000894	OG0000894	OG0000894	OG0000894	OG0000894	OG0000894	COG4409	Metabolism;Cellular Processes And Signaling
OG0000895	OG0000895	OG0000895	OG0000895	OG0000895	OG0000895	NA	NA
OG0000896	OG0000896	OG0000896	OG0000896	OG0000896	OG0000896	COG1526	Metabolism
OG0000897	OG0000897	OG0000897	OG0000897	OG0000897	OG0000897	COG2223	Metabolism
OG0000898	OG0000898	OG0000898	OG0000898	OG0000898	OG0000898	NA	NA
OG0000899	OG0000899	OG0000899	OG0000899	OG0000899	OG0000899	COG0332	Metabolism
OG0000900	OG0000900	OG0000900	OG0000900	OG0000900	OG0000900	COG1940	Metabolism;Information Storage And Processing
OG0000901	OG0000901	OG0000901	OG0000901	OG0000901	OG0000901	COG1129	Metabolism
OG0000902	OG0000902	OG0000902	OG0000902	OG0000902	OG0000902	COG1172	Metabolism
OG0000903	OG0000903	OG0000903	OG0000903	OG0000903	OG0000903	COG0673	Poorly Characterized
OG0000904	OG0000904	OG0000904	OG0000904	OG0000904	OG0000904	COG1082	Metabolism
OG0000905	OG0000905	OG0000905	OG0000905	OG0000905	OG0000905	COG3828	Poorly Characterized
OG0000906	OG0000906	OG0000906	OG0000906	OG0000906	OG0000906	COG3828	Poorly Characterized
OG0000907	OG0000907	OG0000907	OG0000907	OG0000907	OG0000907	COG1260	Metabolism
OG0000908	OG0000908	OG0000908	OG0000908	OG0000908	OG0000908	NA	NA
OG0000909	OG0000909	OG0000909	OG0000909	OG0000909	OG0000909	COG1099	Poorly Characterized
OG0000910	OG0000910	OG0000910	OG0000910	OG0000910	OG0000910	COG1082	Metabolism
OG0000911	OG0000911	OG0000911		OG0000911	OG0000911	COG2271	Metabolism
OG0000912	OG0000912	OG0000912	OG0000912	OG0000912	OG0000912	NA	NA
OG0000913	OG0000913	OG0000913	OG0000913	OG0000913	OG0000913	COG1802	Information Storage And Processing
OG0000914	OG0000914	OG0000914	OG0000914	OG0000914	OG0000914	COG1905	Metabolism
OG0000915	OG0000915	OG0000915	OG0000915	OG0000915	OG0000915	COG1894	Metabolism
OG0000916	OG0000916	OG0000916	OG0000916	OG0000916	OG0000916	COG3383	Poorly Characterized
OG0000917	OG0000917	OG0000917	OG0000917	OG0000917	OG0000917	NA	NA
OG0000918	OG0000918	OG0000918	OG0000918	OG0000918	OG0000918	COG0583	Information Storage And Processing
OG0000919	OG0000919	OG0000919	OG0000919	OG0000919	OG0000919	COG0318	Metabolism
OG0000920	OG0000920	OG0000920	OG0000920	OG0000920	OG0000920	COG0028	Metabolism
OG0000921	OG0000921	OG0000921	OG0000921	OG0000921	OG0000921	COG1804	Metabolism
OG0000922	OG0000922	OG0000922	OG0000922	OG0000922	OG0000922	COG1893	Metabolism
OG0000923	OG0000923	OG0000923	OG0000923	OG0000923	OG0000923	COG1249	Metabolism
OG0000924	OG0000924	OG0000924	OG0000924	OG0000924	OG0000924	COG1511	Poorly Characterized
OG0000925	OG0000925	OG0000925	OG0000925	OG0000925	OG0000925	COG0568	Information Storage And Processing
OG0000926	OG0000926	OG0000926	OG0000926	OG0000926	OG0000926	COG3640	Cellular Processes And Signaling
OG0000927	OG0000927	OG0000927	OG0000927	OG0000927	OG0000927	COG0456	Information Storage And Processing
OG0000928	OG0000928	OG0000928	OG0000928	OG0000928	OG0000928	COG0747	Metabolism
OG0000929	OG0000929	OG0000929	OG0000929	OG0000929	OG0000929	COG1173	Metabolism
OG0000930	OG0000930	OG0000930	OG0000930	OG0000930	OG0000930	COG2211	Metabolism
OG0000931	OG0000931	OG0000931	OG0000931	OG0000931	OG0000931	COG1210	Cellular Processes And Signaling
OG0000932	OG0000932	OG0000932	OG0000932	OG0000932	OG0000932	COG5050	Metabolism
OG0000933	OG0000933	OG0000933	OG0000933	OG0000933	OG0000933	COG1063	Poorly Characterized;Metabolism
OG0000934	OG0000934	OG0000934	OG0000934	OG0000934	OG0000934	COG0438	Cellular Processes And Signaling
OG0000935	OG0000935	OG0000935	OG0000935	OG0000935	OG0000935	NA	NA
OG0000936	OG0000936	OG0000936	OG0000936	OG0000936	OG0000936	COG0392	Cellular Processes And Signaling
OG0000937	OG0000937	OG0000937	OG0000937	OG0000937	OG0000937	COG1402	Metabolism
OG0000938	OG0000938	OG0000938	OG0000938	OG0000938	OG0000938	COG0807	Metabolism
OG0000939	OG0000939	OG0000939	OG0000939	OG0000939	OG0000939	COG0665	Metabolism
OG0000940	OG0000940	OG0000940	OG0000940	OG0000940	OG0000940	COG0686	Metabolism
OG0000941	OG0000941	OG0000941	OG0000941	OG0000941	OG0000941	COG1748	Metabolism
OG0000942	OG0000942	OG0000942	OG0000942	OG0000942	OG0000942	COG1680	Cellular Processes And Signaling
OG0000943	OG0000943	OG0000943	OG0000943	OG0000943	OG0000943	COG2211	Metabolism
OG0000944	OG0000944	OG0000944	OG0000944	OG0000944	OG0000944	COG1309	Information Storage And Processing
OG0000945	OG0000945	OG0000945	OG0000945	OG0000945	OG0000945	COG0169	Metabolism
OG0000946	OG0000946	OG0000946	OG0000946	OG0000946	OG0000946	COG3185	Metabolism;Poorly Characterized
OG0000947	OG0000947	OG0000947	OG0000947	OG0000947	OG0000947	NA	NA
OG0000948	OG0000948	OG0000948	OG0000948	OG0000948	OG0000948	COG0406	Metabolism
OG0000949	OG0000949	OG0000949	OG0000949	OG0000949	OG0000949	COG1023	Metabolism
OG0000950	OG0000950	OG0000950	OG0000950	OG0000950	OG0000950	COG2185	Metabolism
OG0000951	OG0000951	OG0000951	OG0000951	OG0000951	OG0000951	COG1703	Cellular Processes And Signaling
OG0000952	OG0000952	OG0000952	OG0000952	OG0000952	OG0000952	COG3682	Information Storage And Processing
OG0000953	OG0000953	OG0000953		OG0000953	OG0000953	COG2310	Cellular Processes And Signaling
OG0000954	OG0000954	OG0000954	OG0000954	OG0000954	OG0000954	NA	NA
OG0000955	OG0000955	OG0000955	OG0000955	OG0000955	OG0000955	COG0589	Cellular Processes And Signaling
OG0000956	OG0000956	OG0000956	OG0000956	OG0000956	OG0000956	COG1064	Metabolism
OG0000957	OG0000957	OG0000957	OG0000957	OG0000957	OG0000957	COG3957	Metabolism
OG0000958	OG0000958	OG0000958	OG0000958	OG0000958	OG0000958	COG0057	Metabolism
OG0000959	OG0000959	OG0000959	OG0000959	OG0000959	OG0000959	NA	NA
OG0000960	OG0000960	OG0000960	OG0000960	OG0000960	OG0000960	COG0664	Cellular Processes And Signaling
OG0000961	OG0000961	OG0000961	OG0000961	OG0000961	OG0000961	NA	NA
OG0000962	OG0000962	OG0000962	OG0000962	OG0000962	OG0000962	NA	NA
OG0000963	OG0000963	OG0000963	OG0000963	OG0000963	OG0000963	NA	NA
OG0000964	OG0000964	OG0000964	OG0000964	OG0000964	OG0000964	NA	NA
OG0000965	OG0000965	OG0000965	OG0000965	OG0000965		NA	NA
OG0000966	OG0000966	OG0000966	OG0000966	OG0000966	OG0000966	NA	NA
OG0000967	OG0000967	OG0000967	OG0000967	OG0000967	OG0000967	COG3315	Metabolism
OG0000968	OG0000968	OG0000968	OG0000968	OG0000968	OG0000968	NA	NA
OG0000969	OG0000969	OG0000969	OG0000969	OG0000969	OG0000969	COG0333	Information Storage And Processing
OG0000970	OG0000970	OG0000970	OG0000970	OG0000970	OG0000970	COG3689	Poorly Characterized
OG0000971	OG0000971	OG0000971	OG0000971	OG0000971	OG0000971	COG0701	Poorly Characterized
OG0000972	OG0000972	OG0000972	OG0000972	OG0000972	OG0000972	COG3585	Metabolism
OG0000973	OG0000973	OG0000973	OG0000973	OG0000973	OG0000973	COG1680	Cellular Processes And Signaling
OG0000974	OG0000974	OG0000974	OG0000974	OG0000974	OG0000974	COG1072	Metabolism
OG0000975	OG0000975	OG0000975	OG0000975	OG0000975	OG0000975	NA	NA
OG0000976	OG0000976	OG0000976	OG0000976	OG0000976	OG0000976	NA	NA
OG0000977	OG0000977	OG0000977	OG0000977	OG0000977	OG0000977	COG0395	Metabolism
OG0000978	OG0000978	OG0000978	OG0000978	OG0000978	OG0000978	COG1175	Metabolism
OG0000979	OG0000979	OG0000979	OG0000979	OG0000979	OG0000979	COG1653	Metabolism
OG0000980	OG0000980	OG0000980	OG0000980	OG0000980	OG0000980	NA	NA
OG0000981	OG0000981	OG0000981	OG0000981	OG0000981	OG0000981	NA	NA
OG0000982	OG0000982	OG0000982	OG0000982	OG0000982	OG0000982	NA	NA
OG0000983	OG0000983	OG0000983	OG0000983	OG0000983	OG0000983	COG4346	Cellular Processes And Signaling
OG0000984	OG0000984	OG0000984	OG0000984	OG0000984	OG0000984	COG1737	Information Storage And Processing
OG0000985	OG0000985	OG0000985	OG0000985	OG0000985	OG0000985	NA	NA
OG0000986	OG0000986	OG0000986	OG0000986	OG0000986	OG0000986	NA	NA
OG0000987	OG0000987	OG0000987	OG0000987	OG0000987	OG0000987	COG1309	Information Storage And Processing
OG0000988	OG0000988	OG0000988	OG0000988	OG0000988	OG0000988	NA	NA
OG0000989	OG0000989	OG0000989	OG0000989	OG0000989	OG0000989	NA	NA
OG0000990	OG0000990	OG0000990	OG0000990	OG0000990	OG0000990	COG4948	Poorly Characterized;Cellular Processes And Signaling
OG0000991	OG0000991	OG0000991	OG0000991	OG0000991	OG0000991	COG0395	Metabolism
OG0000992	OG0000992	OG0000992	OG0000992	OG0000992	OG0000992	NA	NA
OG0000993	OG0000993	OG0000993	OG0000993	OG0000993	OG0000993	NA	NA
OG0000994	OG0000994	OG0000994	OG0000994	OG0000994	OG0000994	COG1940	Metabolism;Information Storage And Processing
OG0000995	OG0000995	OG0000995	OG0000995	OG0000995	OG0000995	COG1175	Metabolism
OG0000996	OG0000996	OG0000996	OG0000996	OG0000996	OG0000996	COG0395	Metabolism
OG0000997	OG0000997	OG0000997	OG0000997	OG0000997	OG0000997	COG1653	Metabolism
OG0000998	OG0000998	OG0000998	OG0000998	OG0000998	OG0000998	COG0673	Poorly Characterized
OG0000999	OG0000999	OG0000999	OG0000999	OG0000999	OG0000999	COG1376	Cellular Processes And Signaling
OG0001000	OG0001000	OG0001000	OG0001000	OG0001000	OG0001000	NA	NA
OG0001001	OG0001001	OG0001001	OG0001001	OG0001001	OG0001001	COG1028	Metabolism
OG0001002	OG0001002	OG0001002	OG0001002	OG0001002	OG0001002	NA	NA
OG0001003	OG0001003	OG0001003	OG0001003	OG0001003	OG0001003	NA	NA
OG0001004	OG0001004	OG0001004	OG0001004	OG0001004	OG0001004	COG1396	Information Storage And Processing
OG0001005	OG0001005	OG0001005	OG0001005	OG0001005	OG0001005	NA	NA
OG0001006	OG0001006	OG0001006	OG0001006	OG0001006	OG0001006	NA	NA
OG0001007	OG0001007	OG0001007	OG0001007	OG0001007	OG0001007	COG3315	Metabolism
OG0001008	OG0001008	OG0001008	OG0001008	OG0001008	OG0001008	COG0657	Metabolism
OG0001009	OG0001009	OG0001009	OG0001009	OG0001009	OG0001009	COG0684	Information Storage And Processing
OG0001010	OG0001010	OG0001010	OG0001010	OG0001010	OG0001010	COG1802	Information Storage And Processing
OG0001011	OG0001011	OG0001011	OG0001011	OG0001011	OG0001011	COG2355	Cellular Processes And Signaling;Metabolism
OG0001012	OG0001012	OG0001012	OG0001012	OG0001012	OG0001012	COG3226	Information Storage And Processing
OG0001013	OG0001013	OG0001013	OG0001013	OG0001013	OG0001013	COG2249	Poorly Characterized
OG0001014	OG0001014	OG0001014	OG0001014	OG0001014	OG0001014	COG0642	Cellular Processes And Signaling
OG0001015	OG0001015	OG0001015	OG0001015	OG0001015	OG0001015	COG0745	Information Storage And Processing;Cellular Processes And Signaling
OG0001016	OG0001016	OG0001016	OG0001016	OG0001016	OG0001016	COG4097	Metabolism
OG0001017	OG0001017	OG0001017	OG0001017	OG0001017	OG0001017	COG3976	Poorly Characterized
OG0001018	OG0001018	OG0001018	OG0001018	OG0001018	OG0001018	COG1477	Metabolism;Cellular Processes And Signaling
OG0001019	OG0001019		OG0001019	OG0001019	OG0001019	COG0730	Metabolism
OG0001020	OG0001020	OG0001020	OG0001020	OG0001020	OG0001020	COG1937	Information Storage And Processing
OG0001021	OG0001021	OG0001021	OG0001021	OG0001021	OG0001021	COG1132	Cellular Processes And Signaling
OG0001022	OG0001022	OG0001022	OG0001022	OG0001022	OG0001022	NA	NA
OG0001023	OG0001023	OG0001023	OG0001023	OG0001023	OG0001023	NA	NA
OG0001024	OG0001024	OG0001024	OG0001024	OG0001024	OG0001024	COG1309	Information Storage And Processing
OG0001025	OG0001025	OG0001025	OG0001025	OG0001025	OG0001025	COG3391	Poorly Characterized
OG0001026	OG0001026	OG0001026	OG0001026	OG0001026	OG0001026	NA	NA
OG0001027	OG0001027	OG0001027	OG0001027	OG0001027	OG0001027	COG1975	Cellular Processes And Signaling
OG0001028	OG0001028	OG0001028	OG0001028	OG0001028	OG0001028	NA	NA
OG0001029	OG0001029	OG0001029	OG0001029	OG0001029	OG0001029	COG1898	Cellular Processes And Signaling
OG0001030	OG0001030	OG0001030	OG0001030	OG0001030	OG0001030	NA	NA
OG0001031	OG0001031	OG0001031	OG0001031	OG0001031	OG0001031	COG1091	Cellular Processes And Signaling
OG0001032	OG0001032	OG0001032	OG0001032	OG0001032	OG0001032	COG1088	Cellular Processes And Signaling
OG0001033	OG0001033	OG0001033	OG0001033	OG0001033	OG0001033	COG1209	Cellular Processes And Signaling
OG0001034	OG0001034	OG0001034	OG0001034	OG0001034	OG0001034	COG2208	Cellular Processes And Signaling;Information Storage And Processing
OG0001035	OG0001035	OG0001035	OG0001035	OG0001035		COG1132	Cellular Processes And Signaling
OG0001036	OG0001036	OG0001036	OG0001036	OG0001036	OG0001036	COG2208	Information Storage And Processing;Cellular Processes And Signaling
OG0001037	OG0001037	OG0001037	OG0001037	OG0001037	OG0001037	NA	NA
OG0001038	OG0001038	OG0001038	OG0001038	OG0001038	OG0001038	NA	NA
OG0001039	OG0001039	OG0001039	OG0001039	OG0001039	OG0001039	COG0511	Metabolism
OG0001040	OG0001040	OG0001040	OG0001040	OG0001040	OG0001040	COG2274	Cellular Processes And Signaling
OG0001041	OG0001041	OG0001041	OG0001041	OG0001041	OG0001041	COG2274	Cellular Processes And Signaling
OG0001042	OG0001042	OG0001042	OG0001042	OG0001042	OG0001042	COG0477	Metabolism;Poorly Characterized
OG0001043	OG0001043	OG0001043	OG0001043	OG0001043	OG0001043	COG1366	Cellular Processes And Signaling
OG0001044	OG0001044	OG0001044	OG0001044	OG0001044	OG0001044	NA	NA
OG0001045	OG0001045	OG0001045	OG0001045	OG0001045	OG0001045	COG5297	Metabolism
OG0001046	OG0001046	OG0001046	OG0001046	OG0001046	OG0001046	NA	NA
OG0001047	OG0001047	OG0001047	OG0001047	OG0001047	OG0001047	NA	NA
OG0001048	OG0001048	OG0001048	OG0001048	OG0001048	OG0001048	NA	NA
OG0001049	OG0001049	OG0001049	OG0001049	OG0001049	OG0001049	COG3250	Metabolism
OG0001050	OG0001050	OG0001050	OG0001050	OG0001050	OG0001050	COG2208	Cellular Processes And Signaling;Information Storage And Processing
OG0001051	OG0001051	OG0001051	OG0001051	OG0001051	OG0001051	NA	NA
OG0001052	OG0001052	OG0001052	OG0001052	OG0001052	OG0001052	COG2207	Information Storage And Processing
OG0001053	OG0001053	OG0001053	OG0001053	OG0001053	OG0001053	COG5285	Metabolism
OG0001054	OG0001054	OG0001054	OG0001054	OG0001054	OG0001054	COG3868	Metabolism
OG0001055	OG0001055	OG0001055	OG0001055	OG0001055	OG0001055	NA	NA
OG0001056	OG0001056	OG0001056	OG0001056	OG0001056	OG0001056	COG0053	Metabolism
OG0001057	OG0001057	OG0001057	OG0001057	OG0001057	OG0001057	NA	NA
OG0001058	OG0001058	OG0001058	OG0001058	OG0001058	OG0001058	COG3759	Poorly Characterized
OG0001059	OG0001059	OG0001059	OG0001059	OG0001059	OG0001059	COG1062	Metabolism
OG0001060	OG0001060	OG0001060	OG0001060	OG0001060	OG0001060	COG1012	Metabolism
OG0001061	OG0001061	OG0001061	OG0001061	OG0001061	OG0001061	COG1846	Information Storage And Processing
OG0001062	OG0001062	OG0001062	OG0001062	OG0001062	OG0001062	COG1366	Cellular Processes And Signaling
OG0001063	OG0001063	OG0001063	OG0001063	OG0001063	OG0001063	NA	NA
OG0001064	OG0001064	OG0001064	OG0001064	OG0001064	OG0001064	COG4767	Cellular Processes And Signaling
OG0001065	OG0001065	OG0001065	OG0001065	OG0001065	OG0001065	NA	NA
OG0001066	OG0001066	OG0001066	OG0001066	OG0001066	OG0001066	COG3001	Metabolism
OG0001067	OG0001067	OG0001067	OG0001067	OG0001067	OG0001067	NA	NA
OG0001068	OG0001068	OG0001068	OG0001068	OG0001068	OG0001068	COG4129	Poorly Characterized
OG0001069	OG0001069	OG0001069	OG0001069	OG0001069	OG0001069	NA	NA
OG0001070	OG0001070	OG0001070	OG0001070	OG0001070	OG0001070	COG1309	Information Storage And Processing
OG0001071	OG0001071	OG0001071	OG0001071	OG0001071	OG0001071	COG2124	Cellular Processes And Signaling;Metabolism
OG0001072	OG0001072	OG0001072	OG0001072	OG0001072	OG0001072	NA	NA
OG0001073	OG0001073	OG0001073	OG0001073	OG0001073	OG0001073	COG2267	Metabolism
OG0001074	OG0001074	OG0001074	OG0001074	OG0001074	OG0001074	COG1609	Information Storage And Processing
OG0001075	OG0001075	OG0001075	OG0001075	OG0001075	OG0001075	NA	NA
OG0001076	OG0001076	OG0001076	OG0001076	OG0001076	OG0001076	COG3254	Cellular Processes And Signaling
OG0001077	OG0001077	OG0001077	OG0001077	OG0001077	OG0001077	COG1879	Metabolism
OG0001078	OG0001078	OG0001078	OG0001078	OG0001078	OG0001078	COG1172	Metabolism
OG0001079	OG0001079	OG0001079	OG0001079	OG0001079	OG0001079	COG1172	Metabolism
OG0001080	OG0001080	OG0001080	OG0001080	OG0001080	OG0001080	COG1129	Metabolism
OG0001081	OG0001081	OG0001081	OG0001081	OG0001081	OG0001081	COG4952	Cellular Processes And Signaling
OG0001082	OG0001082	OG0001082	OG0001082	OG0001082	OG0001082	COG3347	Metabolism
OG0001083	OG0001083	OG0001083	OG0001083	OG0001083	OG0001083	COG0247	Metabolism
OG0001084	OG0001084	OG0001084	OG0001084	OG0001084	OG0001084	COG1139	Metabolism
OG0001085	OG0001085	OG0001085	OG0001085	OG0001085	OG0001085	COG1556	Metabolism
OG0001086	OG0001086	OG0001086	OG0001086	OG0001086	OG0001086	COG1917	Poorly Characterized
OG0001087	OG0001087	OG0001087	OG0001087	OG0001087	OG0001087	NA	NA
OG0001088	OG0001088	OG0001088	OG0001088	OG0001088	OG0001088	NA	NA
OG0001089	OG0001089	OG0001089	OG0001089	OG0001089	OG0001089	NA	NA
OG0001090	OG0001090	OG0001090	OG0001090	OG0001090	OG0001090	COG3673	Poorly Characterized
OG0001091	OG0001091	OG0001091	OG0001091	OG0001091	OG0001091	COG2197	Cellular Processes And Signaling;Information Storage And Processing
OG0001092	OG0001092	OG0001092	OG0001092	OG0001092	OG0001092	COG4585	Cellular Processes And Signaling
OG0001093	OG0001093	OG0001093	OG0001093	OG0001093	OG0001093	COG1840	Metabolism
OG0001094	OG0001094	OG0001094	OG0001094	OG0001094	OG0001094	COG0300	Poorly Characterized
OG0001095	OG0001095	OG0001095	OG0001095	OG0001095	OG0001095	COG3616	Metabolism
OG0001096	OG0001096	OG0001096	OG0001096	OG0001096	OG0001096	COG0300	Poorly Characterized
OG0001097	OG0001097	OG0001097	OG0001097	OG0001097	OG0001097	COG4783	Cellular Processes And Signaling
OG0001098	OG0001098	OG0001098	OG0001098	OG0001098	OG0001098	COG0242	Information Storage And Processing
OG0001099	OG0001099	OG0001099	OG0001099	OG0001099	OG0001099	COG1249	Metabolism
OG0001100	OG0001100	OG0001100	OG0001100	OG0001100	OG0001100	COG3118	Cellular Processes And Signaling
OG0001101	OG0001101	OG0001101	OG0001101	OG0001101	OG0001101	COG1012	Metabolism
OG0001102	OG0001102	OG0001102	OG0001102	OG0001102	OG0001102	COG1609	Information Storage And Processing
OG0001103	OG0001103	OG0001103	OG0001103	OG0001103	OG0001103	COG1309	Information Storage And Processing
OG0001104	OG0001104	OG0001104	OG0001104	OG0001104	OG0001104	COG0431	Metabolism
OG0001105	OG0001105	OG0001105	OG0001105	OG0001105	OG0001105	NA	NA
OG0001106	OG0001106		OG0001106	OG0001106	OG0001106	COG1309	Information Storage And Processing
OG0001107	OG0001107	OG0001107	OG0001107	OG0001107	OG0001107	NA	NA
OG0001108	OG0001108	OG0001108	OG0001108	OG0001108	OG0001108	NA	NA
OG0001109	OG0001109	OG0001109	OG0001109	OG0001109	OG0001109	COG2268	Poorly Characterized
OG0001110	OG0001110	OG0001110	OG0001110	OG0001110	OG0001110	NA	NA
OG0001111	OG0001111	OG0001111	OG0001111	OG0001111	OG0001111	COG4295	Poorly Characterized
OG0001112	OG0001112	OG0001112	OG0001112	OG0001112	OG0001112	COG3572	Metabolism
OG0001113	OG0001113	OG0001113	OG0001113	OG0001113	OG0001113	COG1262	Cellular Processes And Signaling
OG0001114	OG0001114	OG0001114	OG0001114	OG0001114	OG0001114	COG0121	Poorly Characterized
OG0001115	OG0001115	OG0001115	OG0001115	OG0001115	OG0001115	COG4301	Poorly Characterized
OG0001116	OG0001116	OG0001116	OG0001116	OG0001116	OG0001116	COG3360	Poorly Characterized
OG0001117	OG0001117	OG0001117	OG0001117	OG0001117	OG0001117	NA	NA
OG0001118	OG0001118	OG0001118	OG0001118	OG0001118	OG0001118	COG3940	Metabolism
OG0001119	OG0001119	OG0001119	OG0001119	OG0001119	OG0001119	NA	NA
OG0001120	OG0001120	OG0001120	OG0001120	OG0001120	OG0001120	COG4585	Cellular Processes And Signaling
OG0001121	OG0001121	OG0001121	OG0001121	OG0001121	OG0001121	COG0475	Metabolism
OG0001122	OG0001122	OG0001122	OG0001122	OG0001122	OG0001122	COG0490	Metabolism;Cellular Processes And Signaling
OG0001123	OG0001123	OG0001123	OG0001123	OG0001123	OG0001123	NA	NA
OG0001124	OG0001124	OG0001124	OG0001124	OG0001124	OG0001124	COG3176	Poorly Characterized
OG0001125	OG0001125	OG0001125	OG0001125	OG0001125	OG0001125	COG0479	Metabolism
OG0001126	OG0001126	OG0001126	OG0001126	OG0001126	OG0001126	COG1053	Metabolism
OG0001127	OG0001127	OG0001127	OG0001127	OG0001127	OG0001127	NA	NA
OG0001128	OG0001128	OG0001128	OG0001128	OG0001128	OG0001128	COG5001	Cellular Processes And Signaling
OG0001129	OG0001129	OG0001129	OG0001129	OG0001129	OG0001129	NA	NA
OG0001130	OG0001130	OG0001130	OG0001130	OG0001130	OG0001130	COG4315	Poorly Characterized
OG0001131	OG0001131	OG0001131	OG0001131	OG0001131	OG0001131	NA	NA
OG0001132	OG0001132	OG0001132	OG0001132	OG0001132	OG0001132	NA	NA
OG0001133	OG0001133	OG0001133	OG0001133	OG0001133	OG0001133	NA	NA
OG0001134	OG0001134	OG0001134	OG0001134	OG0001134	OG0001134	COG0726	Cellular Processes And Signaling;Metabolism
OG0001135	OG0001135	OG0001135	OG0001135	OG0001135	OG0001135	COG0589	Cellular Processes And Signaling
OG0001136	OG0001136	OG0001136	OG0001136	OG0001136	OG0001136	COG1595	Information Storage And Processing
OG0001137	OG0001137	OG0001137	OG0001137	OG0001137	OG0001137	NA	NA
OG0001138	OG0001138	OG0001138	OG0001138	OG0001138	OG0001138	NA	NA
OG0001139	OG0001139	OG0001139	OG0001139	OG0001139	OG0001139	COG0266	Information Storage And Processing
OG0001140	OG0001140	OG0001140	OG0001140	OG0001140	OG0001140	COG2208	Information Storage And Processing;Cellular Processes And Signaling
OG0001141	OG0001141	OG0001141	OG0001141	OG0001141	OG0001141	NA	NA
OG0001142	OG0001142	OG0001142	OG0001142	OG0001142	OG0001142	NA	NA
OG0001143	OG0001143	OG0001143	OG0001143	OG0001143	OG0001143	COG3254	Cellular Processes And Signaling
OG0001144	OG0001144	OG0001144	OG0001144	OG0001144	OG0001144	COG0667	Poorly Characterized;Metabolism
OG0001145	OG0001145	OG0001145	OG0001145	OG0001145	OG0001145	COG1129	Metabolism
OG0001146	OG0001146	OG0001146	OG0001146	OG0001146	OG0001146	COG1879	Metabolism
OG0001147	OG0001147	OG0001147	OG0001147	OG0001147	OG0001147	COG2186	Information Storage And Processing
OG0001148	OG0001148	OG0001148	OG0001148	OG0001148	OG0001148	NA	NA
OG0001149	OG0001149	OG0001149	OG0001149	OG0001149	OG0001149	COG0154	Information Storage And Processing
OG0001150	OG0001150	OG0001150	OG0001150	OG0001150	OG0001150	NA	NA
OG0001151	OG0001151	OG0001151	OG0001151	OG0001151	OG0001151	COG1028	Metabolism
OG0001152	OG0001152	OG0001152	OG0001152	OG0001152	OG0001152	COG1028	Metabolism
OG0001153	OG0001153	OG0001153	OG0001153	OG0001153	OG0001153	NA	NA
OG0001154	OG0001154	OG0001154	OG0001154	OG0001154	OG0001154	COG3537	Metabolism
OG0001155	OG0001155	OG0001155	OG0001155	OG0001155	OG0001155	COG0448	Metabolism
OG0001156	OG0001156	OG0001156	OG0001156	OG0001156	OG0001156	COG0438	Cellular Processes And Signaling
OG0001157	OG0001157	OG0001157	OG0001157	OG0001157	OG0001157	COG4114	Metabolism
OG0001158	OG0001158	OG0001158	OG0001158	OG0001158	OG0001158	NA	NA
OG0001159	OG0001159	OG0001159	OG0001159	OG0001159	OG0001159	COG0362	Metabolism
OG0001160	OG0001160	OG0001160	OG0001160	OG0001160	OG0001160	NA	NA
OG0001161	OG0001161	OG0001161	OG0001161	OG0001161	OG0001161	COG2388	Poorly Characterized
OG0001162	OG0001162	OG0001162	OG0001162	OG0001162	OG0001162	COG0853	Metabolism
OG0001163	OG0001163	OG0001163	OG0001163	OG0001163	OG0001163	COG1132	Cellular Processes And Signaling
OG0001164	OG0001164	OG0001164	OG0001164	OG0001164	OG0001164	NA	NA
OG0001165	OG0001165	OG0001165	OG0001165	OG0001165	OG0001165	COG0523	Poorly Characterized
OG0001166	OG0001166	OG0001166	OG0001166	OG0001166	OG0001166	COG0668	Cellular Processes And Signaling
OG0001167	OG0001167	OG0001167	OG0001167	OG0001167	OG0001167	NA	NA
OG0001168	OG0001168	OG0001168	OG0001168	OG0001168	OG0001168	COG2838	Metabolism
OG0001169	OG0001169	OG0001169	OG0001169	OG0001169	OG0001169	NA	NA
OG0001170	OG0001170	OG0001170	OG0001170	OG0001170	OG0001170	COG1404	Cellular Processes And Signaling
OG0001171	OG0001171	OG0001171	OG0001171	OG0001171	OG0001171	COG4995	Poorly Characterized
OG0001172	OG0001172	OG0001172	OG0001172	OG0001172	OG0001172	COG2197	Cellular Processes And Signaling;Information Storage And Processing
OG0001173	OG0001173	OG0001173	OG0001173	OG0001173	OG0001173	NA	NA
OG0001174	OG0001174		OG0001174	OG0001174	OG0001174	COG2141	Poorly Characterized;Metabolism
OG0001175	OG0001175	OG0001175	OG0001175	OG0001175	OG0001175	NA	NA
OG0001176	OG0001176	OG0001176	OG0001176	OG0001176		COG1022	Metabolism
OG0001177	OG0001177	OG0001177	OG0001177	OG0001177	OG0001177	NA	NA
OG0001178	OG0001178	OG0001178	OG0001178	OG0001178	OG0001178	NA	NA
OG0001179	OG0001179	OG0001179	OG0001179	OG0001179	OG0001179	COG2353	Poorly Characterized
OG0001180	OG0001180	OG0001180	OG0001180	OG0001180	OG0001180	COG1454	Metabolism
OG0001181	OG0001181	OG0001181	OG0001181	OG0001181	OG0001181	COG0673	Poorly Characterized
OG0001182	OG0001182	OG0001182	OG0001182	OG0001182	OG0001182	COG5285	Metabolism
OG0001183	OG0001183	OG0001183	OG0001183	OG0001183	OG0001183	COG1028	Metabolism
OG0001184	OG0001184	OG0001184	OG0001184	OG0001184	OG0001184	COG0673	Poorly Characterized
OG0001185	OG0001185	OG0001185	OG0001185	OG0001185	OG0001185	COG0673	Poorly Characterized
OG0001186	OG0001186	OG0001186	OG0001186	OG0001186	OG0001186	COG1879	Metabolism
OG0001187	OG0001187	OG0001187	OG0001187	OG0001187	OG0001187	COG0524	Metabolism
OG0001188	OG0001188	OG0001188	OG0001188	OG0001188	OG0001188	COG3718	Metabolism
OG0001189	OG0001189	OG0001189	OG0001189	OG0001189	OG0001189	COG2188	Information Storage And Processing
OG0001190	OG0001190	OG0001190	OG0001190	OG0001190	OG0001190	NA	NA
OG0001191	OG0001191	OG0001191	OG0001191	OG0001191	OG0001191	COG1574	Poorly Characterized
OG0001192	OG0001192	OG0001192	OG0001192	OG0001192	OG0001192	COG0609	Metabolism
OG0001193	OG0001193	OG0001193	OG0001193	OG0001193	OG0001193	COG4779	Metabolism
OG0001194	OG0001194	OG0001194	OG0001194	OG0001194	OG0001194	COG1120	Metabolism
OG0001195	OG0001195	OG0001195	OG0001195	OG0001195	OG0001195	COG0223	Information Storage And Processing
OG0001196	OG0001196	OG0001196	OG0001196	OG0001196	OG0001196	COG3486	Metabolism
OG0001197	OG0001197	OG0001197	OG0001197	OG0001197	OG0001197	COG1132	Cellular Processes And Signaling
OG0001198	OG0001198	OG0001198	OG0001198	OG0001198	OG0001198	COG1132	Cellular Processes And Signaling
OG0001199	OG0001199	OG0001199	OG0001199	OG0001199	OG0001199	COG0614	Metabolism
OG0001200	OG0001200	OG0001200	OG0001200	OG0001200	OG0001200	COG3940	Metabolism
OG0001201	OG0001201	OG0001201	OG0001201	OG0001201	OG0001201	COG3507	Metabolism
OG0001202	OG0001202	OG0001202	OG0001202	OG0001202	OG0001202	COG1547	Poorly Characterized
OG0001203	OG0001203	OG0001203	OG0001203	OG0001203	OG0001203	COG0730	Metabolism
OG0001204	OG0001204	OG0001204	OG0001204	OG0001204	OG0001204	COG2267	Metabolism
OG0001205	OG0001205	OG0001205	OG0001205	OG0001205	OG0001205	COG0783	Metabolism;Cellular Processes And Signaling
OG0001206	OG0001206	OG0001206	OG0001206	OG0001206	OG0001206	NA	NA
OG0001207	OG0001207	OG0001207	OG0001207	OG0001207	OG0001207	NA	NA
OG0001208	OG0001208	OG0001208	OG0001208	OG0001208	OG0001208	COG1136	Cellular Processes And Signaling
OG0001209	OG0001209	OG0001209	OG0001209	OG0001209	OG0001209	NA	NA
OG0001210	OG0001210	OG0001210	OG0001210	OG0001210	OG0001210	COG2197	Cellular Processes And Signaling;Information Storage And Processing
OG0001211	OG0001211	OG0001211	OG0001211	OG0001211	OG0001211	COG1051	Metabolism
OG0001212	OG0001212	OG0001212	OG0001212	OG0001212	OG0001212	COG1132	Cellular Processes And Signaling
OG0001213	OG0001213	OG0001213	OG0001213	OG0001213	OG0001213	COG3959	Metabolism
OG0001214	OG0001214	OG0001214	OG0001214	OG0001214	OG0001214	COG3958	Metabolism
OG0001215	OG0001215	OG0001215	OG0001215	OG0001215	OG0001215	COG3801	Poorly Characterized
OG0001216	OG0001216	OG0001216	OG0001216	OG0001216	OG0001216	COG0583	Information Storage And Processing
OG0001217	OG0001217	OG0001217	OG0001217	OG0001217	OG0001217	COG0156	Metabolism
OG0001218	OG0001218	OG0001218	OG0001218	OG0001218	OG0001218	COG1063	Metabolism;Poorly Characterized
OG0001219	OG0001219	OG0001219	OG0001219	OG0001219	OG0001219	COG4289	Poorly Characterized
OG0001220	OG0001220	OG0001220	OG0001220	OG0001220	OG0001220	COG0334	Metabolism
OG0001221	OG0001221	OG0001221	OG0001221	OG0001221	OG0001221	COG3226	Information Storage And Processing
OG0001222	OG0001222	OG0001222	OG0001222	OG0001222	OG0001222	COG2755	Metabolism;Cellular Processes And Signaling
OG0001223	OG0001223	OG0001223	OG0001223	OG0001223	OG0001223	COG0739	Cellular Processes And Signaling
OG0001224	OG0001224	OG0001224	OG0001224	OG0001224	OG0001224	COG3345	Metabolism
OG0001225	OG0001225	OG0001225	OG0001225	OG0001225	OG0001225	COG2365	Cellular Processes And Signaling
OG0001226	OG0001226	OG0001226	OG0001226	OG0001226	OG0001226	COG1396	Information Storage And Processing
OG0001227	OG0001227	OG0001227	OG0001227	OG0001227	OG0001227	COG4992	Metabolism
OG0001228	OG0001228	OG0001228	OG0001228	OG0001228	OG0001228	COG1154	Metabolism
OG0001229	OG0001229	OG0001229	OG0001229	OG0001229	OG0001229	COG0535	Cellular Processes And Signaling;Metabolism
OG0001230	OG0001230	OG0001230	OG0001230	OG0001230	OG0001230	COG0775	Metabolism
OG0001231	OG0001231	OG0001231	OG0001231	OG0001231	OG0001231	COG1657	Metabolism
OG0001232	OG0001232	OG0001232	OG0001232	OG0001232	OG0001232	COG0142	Metabolism
OG0001233	OG0001233	OG0001233	OG0001233	OG0001233	OG0001233	COG3349	Poorly Characterized
OG0001234	OG0001234	OG0001234	OG0001234	OG0001234	OG0001234	COG1562	Metabolism
OG0001235	OG0001235	OG0001235	OG0001235	OG0001235	OG0001235	COG1562	Metabolism
OG0001236	OG0001236	OG0001236	OG0001236	OG0001236	OG0001236	COG1134	Metabolism
OG0001237	OG0001237	OG0001237	OG0001237	OG0001237	OG0001237	COG1682	Metabolism
OG0001238	OG0001238	OG0001238	OG0001238	OG0001238	OG0001238	COG1216	Metabolism
OG0001239	OG0001239	OG0001239	OG0001239	OG0001239	OG0001239	COG0371	Metabolism
OG0001240	OG0001240	OG0001240	OG0001240	OG0001240	OG0001240	COG1213	Metabolism
OG0001241	OG0001241	OG0001241	OG0001241	OG0001241	OG0001241	COG0558	Metabolism
OG0001242	OG0001242	OG0001242	OG0001242	OG0001242	OG0001242	COG1230	Metabolism
OG0001243	OG0001243	OG0001243	OG0001243	OG0001243	OG0001243	COG1443	Metabolism
OG0001244	OG0001244	OG0001244	OG0001244	OG0001244	OG0001244	COG3920	Cellular Processes And Signaling
OG0001245	OG0001245	OG0001245	OG0001245	OG0001245	OG0001245	COG1024	Metabolism
OG0001246	OG0001246	OG0001246	OG0001246	OG0001246	OG0001246	COG0488	Poorly Characterized
OG0001247	OG0001247	OG0001247	OG0001247	OG0001247	OG0001247	NA	NA
OG0001248	OG0001248	OG0001248	OG0001248	OG0001248	OG0001248	COG2866	Cellular Processes And Signaling
OG0001249	OG0001249	OG0001249	OG0001249	OG0001249	OG0001249	COG2936	Poorly Characterized
OG0001250	OG0001250	OG0001250	OG0001250	OG0001250	OG0001250	COG1250	Metabolism
OG0001251	OG0001251	OG0001251	OG0001251	OG0001251	OG0001251	COG0183	Metabolism
OG0001252	OG0001252	OG0001252	OG0001252	OG0001252	OG0001252	COG1804	Metabolism
OG0001253	OG0001253	OG0001253	OG0001253	OG0001253	OG0001253	NA	NA
OG0001254	OG0001254	OG0001254	OG0001254	OG0001254	OG0001254	COG1515	Information Storage And Processing
OG0001255	OG0001255	OG0001255	OG0001255	OG0001255	OG0001255	NA	NA
OG0001256	OG0001256	OG0001256	OG0001256	OG0001256	OG0001256	COG4447	Poorly Characterized
OG0001257	OG0001257	OG0001257	OG0001257	OG0001257	OG0001257	NA	NA
OG0001258	OG0001258	OG0001258	OG0001258	OG0001258	OG0001258	COG0488	Poorly Characterized
OG0001259	OG0001259	OG0001259	OG0001259	OG0001259	OG0001259	COG1834	Metabolism
OG0001260	OG0001260	OG0001260	OG0001260	OG0001260	OG0001260	NA	NA
OG0001261	OG0001261	OG0001261	OG0001261	OG0001261	OG0001261	NA	NA
OG0001262	OG0001262	OG0001262	OG0001262	OG0001262	OG0001262	COG3324	Poorly Characterized
OG0001263	OG0001263	OG0001263	OG0001263	OG0001263	OG0001263	COG1609	Information Storage And Processing
OG0001264	OG0001264	OG0001264	OG0001264	OG0001264	OG0001264	COG2132	Metabolism;Cellular Processes And Signaling
OG0001265	OG0001265	OG0001265	OG0001265	OG0001265	OG0001265	COG3828	Poorly Characterized
OG0001266	OG0001266	OG0001266	OG0001266	OG0001266	OG0001266	NA	NA
OG0001267	OG0001267	OG0001267	OG0001267	OG0001267	OG0001267	COG3285	Information Storage And Processing
OG0001268	OG0001268	OG0001268	OG0001268	OG0001268	OG0001268	COG1793	Information Storage And Processing
OG0001269	OG0001269	OG0001269	OG0001269	OG0001269	OG0001269	NA	NA
OG0001270	OG0001270	OG0001270	OG0001270	OG0001270	OG0001270	COG1414	Information Storage And Processing
OG0001271	OG0001271	OG0001271	OG0001271	OG0001271	OG0001271	COG1846	Information Storage And Processing
OG0001272	OG0001272	OG0001272	OG0001272	OG0001272	OG0001272	COG3485	Metabolism
OG0001273	OG0001273	OG0001273	OG0001273	OG0001273	OG0001273	COG0015	Metabolism
OG0001274	OG0001274	OG0001274	OG0001274	OG0001274	OG0001274	COG0599	Poorly Characterized
OG0001275	OG0001275	OG0001275	OG0001275	OG0001275	OG0001275	COG3899	Poorly Characterized
OG0001276	OG0001276	OG0001276	OG0001276	OG0001276	OG0001276	NA	NA
OG0001277	OG0001277	OG0001277	OG0001277	OG0001277	OG0001277	COG1309	Information Storage And Processing
OG0001278	OG0001278	OG0001278	OG0001278	OG0001278	OG0001278	NA	NA
OG0001279	OG0001279	OG0001279	OG0001279	OG0001279	OG0001279	NA	NA
OG0001280	OG0001280	OG0001280	OG0001280	OG0001280	OG0001280	COG4894	Metabolism
OG0001281	OG0001281	OG0001281	OG0001281	OG0001281	OG0001281	COG3511	Cellular Processes And Signaling
OG0001282	OG0001282	OG0001282	OG0001282	OG0001282	OG0001282	COG0725	Metabolism
OG0001283	OG0001283	OG0001283	OG0001283	OG0001283	OG0001283	COG0555	Metabolism
OG0001284	OG0001284	OG0001284	OG0001284	OG0001284	OG0001284	COG3842	Metabolism
OG0001285	OG0001285		OG0001285	OG0001285	OG0001285	NA	NA
OG0001286	OG0001286	OG0001286	OG0001286	OG0001286	OG0001286	COG0596	Metabolism;Poorly Characterized
OG0001287	OG0001287	OG0001287	OG0001287	OG0001287	OG0001287	COG4638	Metabolism;Poorly Characterized
OG0001288	OG0001288	OG0001288	OG0001288	OG0001288	OG0001288	NA	NA
OG0001289	OG0001289	OG0001289	OG0001289	OG0001289	OG0001289	COG1018	Metabolism
OG0001290	OG0001290	OG0001290	OG0001290	OG0001290	OG0001290	COG0715	Metabolism
OG0001291	OG0001291	OG0001291	OG0001291	OG0001291	OG0001291	COG1116	Metabolism
OG0001292	OG0001292	OG0001292	OG0001292	OG0001292	OG0001292	NA	NA
OG0001293	OG0001293	OG0001293	OG0001293	OG0001293	OG0001293	COG1476	Information Storage And Processing
OG0001294	OG0001294	OG0001294	OG0001294	OG0001294	OG0001294	NA	NA
OG0001295	OG0001295	OG0001295	OG0001295	OG0001295	OG0001295	NA	NA
OG0001296	OG0001296	OG0001296	OG0001296	OG0001296	OG0001296	COG0596	Poorly Characterized;Metabolism
OG0001297	OG0001297	OG0001297	OG0001297	OG0001297	OG0001297	NA	NA
OG0001298	OG0001298	OG0001298	OG0001298	OG0001298	OG0001298	COG1409	Cellular Processes And Signaling
OG0001299	OG0001299	OG0001299	OG0001299	OG0001299	OG0001299	COG0189	Information Storage And Processing;Metabolism
OG0001300	OG0001300	OG0001300	OG0001300	OG0001300	OG0001300	COG0383	Metabolism
OG0001301	OG0001301	OG0001301	OG0001301	OG0001301	OG0001301	COG0524	Metabolism
OG0001302	OG0001302	OG0001302	OG0001302	OG0001302	OG0001302	COG1409	Cellular Processes And Signaling
OG0001303	OG0001303	OG0001303		OG0001303	OG0001303	COG2159	Metabolism
OG0001304	OG0001304	OG0001304		OG0001304	OG0001304	COG1028	Metabolism
OG0001305	OG0001305	OG0001305	OG0001305	OG0001305	OG0001305	COG3281	Metabolism
OG0001306	OG0001306	OG0001306	OG0001306	OG0001306	OG0001306	COG3973	Information Storage And Processing
OG0001307	OG0001307	OG0001307	OG0001307	OG0001307	OG0001307	NA	NA
OG0001308	OG0001308	OG0001308	OG0001308	OG0001308	OG0001308	COG3118	Cellular Processes And Signaling
OG0001309	OG0001309	OG0001309	OG0001309	OG0001309	OG0001309	COG0789	Information Storage And Processing
OG0001310	OG0001310	OG0001310	OG0001310	OG0001310	OG0001310	COG0451	Cellular Processes And Signaling
OG0001311	OG0001311	OG0001311	OG0001311	OG0001311	OG0001311	COG4405	Poorly Characterized
OG0001312	OG0001312	OG0001312	OG0001312	OG0001312	OG0001312	COG2814	Metabolism
OG0001313	OG0001313	OG0001313	OG0001313	OG0001313	OG0001313	COG1301	Metabolism
OG0001314	OG0001314	OG0001314	OG0001314	OG0001314	OG0001314	COG3290	Cellular Processes And Signaling
OG0001315	OG0001315	OG0001315	OG0001315	OG0001315	OG0001315	COG4565	Cellular Processes And Signaling;Information Storage And Processing
OG0001316	OG0001316	OG0001316	OG0001316	OG0001316	OG0001316	COG1653	Metabolism
OG0001317	OG0001317	OG0001317	OG0001317	OG0001317	OG0001317	COG1175	Metabolism
OG0001318	OG0001318	OG0001318	OG0001318	OG0001318	OG0001318	NA	NA
OG0001319	OG0001319	OG0001319	OG0001319	OG0001319	OG0001319	COG0205	Metabolism
OG0001320	OG0001320	OG0001320	OG0001320	OG0001320	OG0001320	COG0857	Poorly Characterized
OG0001321	OG0001321	OG0001321	OG0001321	OG0001321	OG0001321	COG0469	Metabolism
OG0001322	OG0001322	OG0001322	OG0001322	OG0001322	OG0001322	NA	NA
OG0001323	OG0001323	OG0001323	OG0001323	OG0001323	OG0001323	COG3118	Cellular Processes And Signaling
OG0001324	OG0001324	OG0001324	OG0001324	OG0001324	OG0001324	COG1309	Information Storage And Processing
OG0001325	OG0001325	OG0001325	OG0001325	OG0001325	OG0001325	NA	NA
OG0001326	OG0001326	OG0001326	OG0001326	OG0001326	OG0001326	COG1846	Information Storage And Processing
OG0001327	OG0001327	OG0001327	OG0001327	OG0001327	OG0001327	COG0011	Metabolism
OG0001328	OG0001328	OG0001328	OG0001328	OG0001328	OG0001328	NA	NA
OG0001329	OG0001329	OG0001329	OG0001329	OG0001329	OG0001329	COG2013	Metabolism
OG0001330	OG0001330	OG0001330	OG0001330	OG0001330	OG0001330	COG2013	Metabolism
OG0001331	OG0001331	OG0001331	OG0001331	OG0001331	OG0001331	COG2013	Metabolism
OG0001332	OG0001332	OG0001332	OG0001332	OG0001332	OG0001332	COG1846	Information Storage And Processing
OG0001333	OG0001333	OG0001333	OG0001333	OG0001333	OG0001333	COG0745	Cellular Processes And Signaling;Information Storage And Processing
OG0001334	OG0001334	OG0001334	OG0001334	OG0001334	OG0001334	COG1703	Cellular Processes And Signaling
OG0001335	OG0001335	OG0001335	OG0001335	OG0001335	OG0001335	COG0183	Metabolism
OG0001336	OG0001336	OG0001336	OG0001336	OG0001336	OG0001336	COG3185	Metabolism;Poorly Characterized
OG0001337	OG0001337	OG0001337	OG0001337	OG0001337	OG0001337	NA	NA
OG0001338	OG0001338	OG0001338	OG0001338	OG0001338	OG0001338	NA	NA
OG0001339	OG0001339	OG0001339	OG0001339	OG0001339	OG0001339	COG1131	Cellular Processes And Signaling
OG0001340	OG0001340	OG0001340	OG0001340	OG0001340	OG0001340	NA	NA
OG0001341	OG0001341	OG0001341	OG0001341	OG0001341	OG0001341	NA	NA
OG0001342	OG0001342	OG0001342	OG0001342	OG0001342	OG0001342	COG2141	Metabolism;Poorly Characterized
OG0001343	OG0001343	OG0001343	OG0001343	OG0001343	OG0001343	NA	NA
OG0001344	OG0001344	OG0001344	OG0001344	OG0001344	OG0001344	COG1637	Information Storage And Processing
OG0001345	OG0001345	OG0001345	OG0001345	OG0001345	OG0001345	COG1366	Cellular Processes And Signaling
OG0001346	OG0001346	OG0001346	OG0001346	OG0001346	OG0001346	COG1250	Metabolism
OG0001347	OG0001347	OG0001347	OG0001347	OG0001347	OG0001347	COG2096	Metabolism
OG0001348	OG0001348	OG0001348	OG0001348	OG0001348	OG0001348	NA	NA
OG0001349	OG0001349	OG0001349	OG0001349	OG0001349	OG0001349	COG4585	Cellular Processes And Signaling
OG0001350	OG0001350	OG0001350	OG0001350	OG0001350	OG0001350	COG2197	Information Storage And Processing;Cellular Processes And Signaling
OG0001351	OG0001351	OG0001351	OG0001351	OG0001351	OG0001351	COG3325	Metabolism
OG0001352	OG0001352	OG0001352	OG0001352	OG0001352	OG0001352	NA	NA
OG0001353	OG0001353	OG0001353	OG0001353	OG0001353	OG0001353	COG0355	Metabolism
OG0001354	OG0001354	OG0001354	OG0001354	OG0001354	OG0001354	COG0055	Metabolism
OG0001355	OG0001355	OG0001355	OG0001355	OG0001355	OG0001355	COG0224	Metabolism
OG0001356	OG0001356	OG0001356	OG0001356	OG0001356	OG0001356	COG0056	Metabolism
OG0001357	OG0001357	OG0001357	OG0001357	OG0001357	OG0001357	COG0712	Metabolism
OG0001358	OG0001358	OG0001358	OG0001358	OG0001358	OG0001358	COG0711	Metabolism
OG0001359	OG0001359	OG0001359	OG0001359	OG0001359	OG0001359	COG0636	Metabolism
OG0001360	OG0001360	OG0001360	OG0001360	OG0001360	OG0001360	COG0356	Metabolism
OG0001361	OG0001361	OG0001361	OG0001361	OG0001361	OG0001361	NA	NA
OG0001362	OG0001362	OG0001362	OG0001362	OG0001362	OG0001362	COG0472	Cellular Processes And Signaling
OG0001363	OG0001363	OG0001363	OG0001363	OG0001363	OG0001363	COG0112	Metabolism
OG0001364	OG0001364	OG0001364	OG0001364	OG0001364	OG0001364	COG0394	Cellular Processes And Signaling
OG0001365	OG0001365	OG0001365	OG0001365	OG0001365	OG0001365	COG0009	Information Storage And Processing
OG0001366	OG0001366	OG0001366	OG0001366	OG0001366	OG0001366	COG2890	Information Storage And Processing
OG0001367	OG0001367	OG0001367	OG0001367	OG0001367	OG0001367	COG0216	Information Storage And Processing
OG0001368	OG0001368	OG0001368	OG0001368	OG0001368	OG0001368	COG0254	Information Storage And Processing
OG0001369	OG0001369	OG0001369	OG0001369	OG0001369	OG0001369	COG1316	Cellular Processes And Signaling
OG0001370	OG0001370	OG0001370	OG0001370	OG0001370	OG0001370	NA	NA
OG0001371	OG0001371	OG0001371	OG0001371	OG0001371	OG0001371	COG1158	Information Storage And Processing
OG0001372	OG0001372	OG0001372	OG0001372	OG0001372	OG0001372	COG0083	Metabolism
OG0001373	OG0001373	OG0001373	OG0001373	OG0001373	OG0001373	COG0498	Metabolism
OG0001374	OG0001374	OG0001374	OG0001374	OG0001374	OG0001374	COG0460	Metabolism
OG0001375	OG0001375	OG0001375	OG0001375	OG0001375	OG0001375	COG0019	Metabolism
OG0001376	OG0001376	OG0001376	OG0001376	OG0001376	OG0001376	NA	NA
OG0001377	OG0001377		OG0001377	OG0001377	OG0001377	COG1609	Information Storage And Processing
OG0001378	OG0001378	OG0001378	OG0001378	OG0001378	OG0001378	COG0515	Cellular Processes And Signaling
OG0001379	OG0001379	OG0001379	OG0001379	OG0001379	OG0001379	COG1656	Poorly Characterized
OG0001380	OG0001380	OG0001380	OG0001380	OG0001380	OG0001380	NA	NA
OG0001381	OG0001381	OG0001381	OG0001381	OG0001381	OG0001381	COG2227	Metabolism
OG0001382	OG0001382	OG0001382	OG0001382	OG0001382	OG0001382	COG1819	Metabolism
OG0001383	OG0001383	OG0001383	OG0001383	OG0001383	OG0001383	COG0596	Metabolism;Poorly Characterized
OG0001384	OG0001384	OG0001384	OG0001384	OG0001384	OG0001384	COG0236	Metabolism
OG0001385	OG0001385	OG0001385	OG0001385	OG0001385	OG0001385	COG3321	Metabolism
OG0001386	OG0001386	OG0001386	OG0001386	OG0001386	OG0001386	COG0304	Metabolism
OG0001387	OG0001387	OG0001387	OG0001387	OG0001387	OG0001387	COG1273	Information Storage And Processing
OG0001388	OG0001388	OG0001388	OG0001388	OG0001388	OG0001388	COG3285	Information Storage And Processing
OG0001389	OG0001389	OG0001389	OG0001389	OG0001389	OG0001389	NA	NA
OG0001390	OG0001390	OG0001390	OG0001390	OG0001390	OG0001390	COG2453	Cellular Processes And Signaling
OG0001391	OG0001391	OG0001391	OG0001391	OG0001391	OG0001391	NA	NA
OG0001392	OG0001392	OG0001392	OG0001392	OG0001392	OG0001392	COG0642	Cellular Processes And Signaling
OG0001393	OG0001393	OG0001393	OG0001393	OG0001393	OG0001393	COG0772	Cellular Processes And Signaling
OG0001394	OG0001394	OG0001394	OG0001394	OG0001394	OG0001394	COG0768	Cellular Processes And Signaling
OG0001395	OG0001395	OG0001395	OG0001395	OG0001395	OG0001395	NA	NA
OG0001396	OG0001396	OG0001396	OG0001396	OG0001396	OG0001396	COG0791	Cellular Processes And Signaling
OG0001397	OG0001397	OG0001397	OG0001397	OG0001397	OG0001397	COG0654	Metabolism
OG0001398	OG0001398	OG0001398	OG0001398	OG0001398	OG0001398	COG2229	Cellular Processes And Signaling
OG0001399	OG0001399	OG0001399	OG0001399	OG0001399	OG0001399	NA	NA
OG0001400	OG0001400	OG0001400	OG0001400	OG0001400	OG0001400	COG2018	Cellular Processes And Signaling
OG0001401	OG0001401	OG0001401	OG0001401	OG0001401	OG0001401	COG2205	Cellular Processes And Signaling
OG0001402	OG0001402	OG0001402	OG0001402	OG0001402	OG0001402	NA	NA
OG0001403	OG0001403	OG0001403	OG0001403	OG0001403	OG0001403	COG1846	Information Storage And Processing
OG0001404	OG0001404	OG0001404	OG0001404	OG0001404	OG0001404	COG0466	Cellular Processes And Signaling
OG0001405	OG0001405	OG0001405	OG0001405	OG0001405	OG0001405	NA	NA
OG0001406	OG0001406	OG0001406	OG0001406	OG0001406	OG0001406	COG0421	Metabolism
OG0001407	OG0001407	OG0001407	OG0001407	OG0001407	OG0001407	COG0745	Cellular Processes And Signaling;Information Storage And Processing
OG0001408	OG0001408	OG0001408	OG0001408	OG0001408	OG0001408	COG2205	Cellular Processes And Signaling
OG0001409	OG0001409	OG0001409	OG0001409	OG0001409	OG0001409	COG0567	Metabolism
OG0001410	OG0001410	OG0001410	OG0001410	OG0001410	OG0001410	NA	NA
OG0001411	OG0001411	OG0001411	OG0001411	OG0001411	OG0001411	COG3595	Poorly Characterized
OG0001412	OG0001412	OG0001412	OG0001412	OG0001412	OG0001412	COG1695	Information Storage And Processing
OG0001413	OG0001413	OG0001413	OG0001413	OG0001413	OG0001413	COG0542	Cellular Processes And Signaling
OG0001414	OG0001414	OG0001414	OG0001414	OG0001414	OG0001414	NA	NA
OG0001415	OG0001415	OG0001415	OG0001415	OG0001415	OG0001415	COG0604	Poorly Characterized;Metabolism
OG0001416	OG0001416	OG0001416	OG0001416	OG0001416	OG0001416	COG2515	Metabolism
OG0001417	OG0001417	OG0001417	OG0001417	OG0001417	OG0001417	COG0025	Metabolism
OG0001418	OG0001418	OG0001418	OG0001418	OG0001418	OG0001418	COG5207	Poorly Characterized
OG0001419	OG0001419	OG0001419	OG0001419	OG0001419	OG0001419	COG1191	Information Storage And Processing
OG0001420	OG0001420	OG0001420	OG0001420	OG0001420	OG0001420	NA	NA
OG0001421	OG0001421	OG0001421	OG0001421	OG0001421	OG0001421	COG1597	Poorly Characterized;Metabolism
OG0001422	OG0001422	OG0001422	OG0001422	OG0001422	OG0001422	COG3920	Cellular Processes And Signaling
OG0001423	OG0001423	OG0001423	OG0001423	OG0001423	OG0001423	COG0363	Metabolism
OG0001424	OG0001424	OG0001424	OG0001424	OG0001424	OG0001424	COG1472	Metabolism
OG0001425	OG0001425	OG0001425	OG0001425	OG0001425	OG0001425	COG0395	Metabolism
OG0001426	OG0001426	OG0001426	OG0001426	OG0001426	OG0001426	COG1175	Metabolism
OG0001427	OG0001427	OG0001427	OG0001427	OG0001427	OG0001427	NA	NA
OG0001428	OG0001428	OG0001428	OG0001428	OG0001428	OG0001428	COG2188	Information Storage And Processing
OG0001429	OG0001429	OG0001429	OG0001429	OG0001429	OG0001429	COG0209	Metabolism
OG0001430	OG0001430	OG0001430	OG0001430	OG0001430	OG0001430	COG0208	Metabolism
OG0001431	OG0001431	OG0001431	OG0001431	OG0001431	OG0001431	COG4977	Information Storage And Processing
OG0001432	OG0001432	OG0001432	OG0001432	OG0001432	OG0001432	COG2124	Metabolism;Cellular Processes And Signaling
OG0001433	OG0001433	OG0001433	OG0001433	OG0001433	OG0001433	NA	NA
OG0001434	OG0001434	OG0001434	OG0001434	OG0001434	OG0001434	COG0242	Information Storage And Processing
OG0001435	OG0001435	OG0001435	OG0001435	OG0001435	OG0001435	NA	NA
OG0001436	OG0001436	OG0001436	OG0001436	OG0001436	OG0001436	COG3437	Cellular Processes And Signaling
OG0001437	OG0001437	OG0001437	OG0001437	OG0001437	OG0001437	COG2206	Cellular Processes And Signaling
OG0001438	OG0001438	OG0001438	OG0001438	OG0001438	OG0001438	COG2018	Cellular Processes And Signaling
OG0001439	OG0001439	OG0001439	OG0001439	OG0001439	OG0001439	NA	NA
OG0001440	OG0001440	OG0001440	OG0001440	OG0001440	OG0001440	NA	NA
OG0001441	OG0001441	OG0001441	OG0001441	OG0001441	OG0001441	NA	NA
OG0001442	OG0001442	OG0001442	OG0001442	OG0001442	OG0001442	COG1595	Information Storage And Processing
OG0001443	OG0001443	OG0001443	OG0001443	OG0001443	OG0001443	COG3571	Poorly Characterized
OG0001444	OG0001444	OG0001444	OG0001444	OG0001444	OG0001444	COG2135	Information Storage And Processing
OG0001445	OG0001445	OG0001445	OG0001445	OG0001445	OG0001445	NA	NA
OG0001446	OG0001446	OG0001446	OG0001446	OG0001446	OG0001446	COG0128	Metabolism
OG0001447	OG0001447	OG0001447	OG0001447	OG0001447	OG0001447	COG1162	Information Storage And Processing
OG0001448	OG0001448	OG0001448	OG0001448	OG0001448	OG0001448	COG2076	Cellular Processes And Signaling
OG0001449	OG0001449	OG0001449	OG0001449	OG0001449	OG0001449	COG1309	Information Storage And Processing
OG0001450	OG0001450	OG0001450	OG0001450	OG0001450	OG0001450	COG0483	Metabolism
OG0001451	OG0001451	OG0001451	OG0001451	OG0001451	OG0001451	COG2905	Cellular Processes And Signaling
OG0001452	OG0001452	OG0001452	OG0001452	OG0001452	OG0001452	COG1615	Poorly Characterized
OG0001453	OG0001453	OG0001453	OG0001453	OG0001453	OG0001453	NA	NA
OG0001454	OG0001454	OG0001454	OG0001454	OG0001454	OG0001454	COG3480	Cellular Processes And Signaling
OG0001455	OG0001455	OG0001455	OG0001455	OG0001455	OG0001455	NA	NA
OG0001456	OG0001456	OG0001456	OG0001456	OG0001456	OG0001456	COG0451	Cellular Processes And Signaling
OG0001457	OG0001457	OG0001457	OG0001457	OG0001457	OG0001457	COG5282	Cellular Processes And Signaling
OG0001458	OG0001458	OG0001458	OG0001458	OG0001458	OG0001458	COG1051	Metabolism
OG0001459	OG0001459	OG0001459	OG0001459	OG0001459	OG0001459	COG2013	Metabolism
OG0001460	OG0001460	OG0001460	OG0001460	OG0001460	OG0001460	COG2013	Metabolism
OG0001461	OG0001461	OG0001461	OG0001461	OG0001461	OG0001461	COG2310	Cellular Processes And Signaling
OG0001462	OG0001462	OG0001462	OG0001462	OG0001462	OG0001462	COG1451	Poorly Characterized
OG0001463	OG0001463	OG0001463	OG0001463	OG0001463	OG0001463	NA	NA
OG0001464	OG0001464	OG0001464	OG0001464	OG0001464	OG0001464	COG0661	Metabolism;Cellular Processes And Signaling
OG0001465	OG0001465	OG0001465	OG0001465	OG0001465	OG0001465	NA	NA
OG0001466	OG0001466	OG0001466	OG0001466	OG0001466	OG0001466	NA	NA
OG0001467	OG0001467	OG0001467	OG0001467	OG0001467	OG0001467	COG0514	Information Storage And Processing
OG0001468	OG0001468	OG0001468	OG0001468	OG0001468	OG0001468	COG0695	Cellular Processes And Signaling
OG0001469	OG0001469	OG0001469	OG0001469	OG0001469	OG0001469	COG2816	Metabolism
OG0001470	OG0001470	OG0001470	OG0001470	OG0001470	OG0001470	COG0624	Metabolism
OG0001471	OG0001471	OG0001471	OG0001471	OG0001471	OG0001471	COG0210	Information Storage And Processing
OG0001472	OG0001472	OG0001472	OG0001472	OG0001472	OG0001472	COG2887	Information Storage And Processing
OG0001473	OG0001473	OG0001473	OG0001473	OG0001473	OG0001473	COG3695	Information Storage And Processing
OG0001474	OG0001474	OG0001474	OG0001474	OG0001474	OG0001474	COG0392	Cellular Processes And Signaling
OG0001475	OG0001475	OG0001475	OG0001475	OG0001475	OG0001475	NA	NA
OG0001476	OG0001476	OG0001476	OG0001476	OG0001476	OG0001476	COG0607	Metabolism
OG0001477	OG0001477	OG0001477	OG0001477	OG0001477	OG0001477	NA	NA
OG0001478	OG0001478	OG0001478	OG0001478	OG0001478	OG0001478	COG0451	Cellular Processes And Signaling
OG0001479	OG0001479	OG0001479	OG0001479	OG0001479	OG0001479	NA	NA
OG0001480	OG0001480	OG0001480	OG0001480	OG0001480	OG0001480	COG0438	Cellular Processes And Signaling
OG0001481	OG0001481	OG0001481	OG0001481	OG0001481	OG0001481	NA	NA
OG0001482	OG0001482	OG0001482	OG0001482	OG0001482	OG0001482	COG0596	Poorly Characterized;Metabolism
OG0001483	OG0001483	OG0001483	OG0001483	OG0001483	OG0001483	COG1309	Information Storage And Processing
OG0001484	OG0001484	OG0001484	OG0001484	OG0001484	OG0001484	NA	NA
OG0001485	OG0001485	OG0001485	OG0001485	OG0001485	OG0001485	NA	NA
OG0001486	OG0001486	OG0001486	OG0001486	OG0001486	OG0001486	COG1633	Metabolism
OG0001487	OG0001487	OG0001487	OG0001487	OG0001487	OG0001487	COG0513	Information Storage And Processing
OG0001488	OG0001488	OG0001488	OG0001488	OG0001488	OG0001488	COG0596	Poorly Characterized;Metabolism
OG0001489	OG0001489	OG0001489	OG0001489	OG0001489	OG0001489	COG1432	Poorly Characterized
OG0001490	OG0001490	OG0001490	OG0001490	OG0001490	OG0001490	NA	NA
OG0001491	OG0001491	OG0001491	OG0001491	OG0001491	OG0001491	COG2095	Metabolism
OG0001492	OG0001492	OG0001492	OG0001492	OG0001492	OG0001492	COG0613	Metabolism
OG0001493	OG0001493	OG0001493	OG0001493	OG0001493	OG0001493	NA	NA
OG0001494	OG0001494	OG0001494	OG0001494	OG0001494	OG0001494	COG0598	Metabolism
OG0001495	OG0001495	OG0001495	OG0001495	OG0001495	OG0001495	NA	NA
OG0001496	OG0001496	OG0001496	OG0001496	OG0001496	OG0001496	NA	NA
OG0001497	OG0001497	OG0001497	OG0001497	OG0001497	OG0001497	COG2239	Metabolism
OG0001498	OG0001498	OG0001498	OG0001498	OG0001498	OG0001498	COG4420	Poorly Characterized
OG0001499	OG0001499	OG0001499	OG0001499	OG0001499	OG0001499	COG0489	Cellular Processes And Signaling
OG0001500	OG0001500	OG0001500	OG0001500	OG0001500	OG0001500	NA	NA
OG0001501	OG0001501	OG0001501	OG0001501	OG0001501	OG0001501	COG1826	Cellular Processes And Signaling
OG0001502	OG0001502	OG0001502	OG0001502	OG0001502	OG0001502	COG5662	Information Storage And Processing
OG0001503	OG0001503	OG0001503	OG0001503	OG0001503	OG0001503	COG1595	Information Storage And Processing
OG0001504	OG0001504	OG0001504	OG0001504	OG0001504	OG0001504	COG4122	Information Storage And Processing
OG0001505	OG0001505	OG0001505	OG0001505	OG0001505	OG0001505	NA	NA
OG0001506	OG0001506	OG0001506	OG0001506	OG0001506	OG0001506	COG1024	Metabolism
OG0001507	OG0001507	OG0001507	OG0001507	OG0001507	OG0001507	COG2818	Information Storage And Processing
OG0001508	OG0001508	OG0001508	OG0001508	OG0001508	OG0001508	NA	NA
OG0001509	OG0001509	OG0001509	OG0001509	OG0001509	OG0001509	COG0294	Metabolism
OG0001510	OG0001510	OG0001510	OG0001510	OG0001510	OG0001510	COG1611	Metabolism
OG0001511	OG0001511	OG0001511	OG0001511	OG0001511	OG0001511	COG0739	Cellular Processes And Signaling
OG0001512	OG0001512	OG0001512	OG0001512	OG0001512	OG0001512	COG0436	Metabolism
OG0001513	OG0001513	OG0001513	OG0001513	OG0001513	OG0001513	COG3393	Poorly Characterized
OG0001514	OG0001514	OG0001514	OG0001514	OG0001514	OG0001514	NA	NA
OG0001515	OG0001515	OG0001515	OG0001515	OG0001515	OG0001515	COG2120	Metabolism
OG0001516	OG0001516	OG0001516	OG0001516	OG0001516	OG0001516	NA	NA
OG0001517	OG0001517	OG0001517	OG0001517	OG0001517	OG0001517	COG1173	Metabolism
OG0001518	OG0001518	OG0001518	OG0001518	OG0001518	OG0001518	COG0747	Metabolism
OG0001519	OG0001519	OG0001519	OG0001519	OG0001519	OG0001519	COG0601	Metabolism
OG0001520	OG0001520	OG0001520	OG0001520	OG0001520	OG0001520	COG0444	Metabolism
OG0001521	OG0001521	OG0001521	OG0001521	OG0001521	OG0001521	COG3324	Poorly Characterized
OG0001522	OG0001522	OG0001522	OG0001522	OG0001522	OG0001522	COG4608	Metabolism
OG0001523	OG0001523	OG0001523	OG0001523	OG0001523	OG0001523	COG0444	Metabolism
OG0001524	OG0001524	OG0001524	OG0001524	OG0001524	OG0001524	COG1217	Cellular Processes And Signaling
OG0001525	OG0001525	OG0001525	OG0001525	OG0001525	OG0001525	COG4166	Metabolism
OG0001526	OG0001526	OG0001526	OG0001526	OG0001526	OG0001526	NA	NA
OG0001527	OG0001527	OG0001527	OG0001527	OG0001527	OG0001527	NA	NA
OG0001528	OG0001528	OG0001528	OG0001528	OG0001528	OG0001528	COG1053	Metabolism
OG0001529	OG0001529	OG0001529	OG0001529	OG0001529	OG0001529	COG0479	Metabolism
OG0001530	OG0001530	OG0001530	OG0001530	OG0001530	OG0001530	NA	NA
OG0001531	OG0001531	OG0001531	OG0001531	OG0001531	OG0001531	COG2208	Cellular Processes And Signaling;Information Storage And Processing
OG0001532	OG0001532	OG0001532	OG0001532	OG0001532	OG0001532	COG2172	Cellular Processes And Signaling
OG0001533	OG0001533	OG0001533	OG0001533	OG0001533	OG0001533	NA	NA
OG0001534	OG0001534	OG0001534	OG0001534	OG0001534	OG0001534	NA	NA
OG0001535	OG0001535	OG0001535	OG0001535	OG0001535	OG0001535	NA	NA
OG0001536	OG0001536	OG0001536			OG0001536	COG1396	Information Storage And Processing
OG0001537	OG0001537	OG0001537			OG0001537	COG3967	Cellular Processes And Signaling;Metabolism
OG0001538	OG0001538	OG0001538	OG0001538	OG0001538		NA	NA
OG0001539	OG0001539	OG0001539	OG0001539	OG0001539		COG1695	Information Storage And Processing
OG0001540	OG0001540	OG0001540	OG0001540	OG0001540		COG1136	Cellular Processes And Signaling
OG0001541	OG0001541	OG0001541	OG0001541	OG0001541		COG3745	Cellular Processes And Signaling
OG0001542	OG0001542	OG0001542	OG0001542	OG0001542		NA	NA
OG0001543	OG0001543	OG0001543	OG0001543	OG0001543		COG1309	Information Storage And Processing
OG0001544	OG0001544	OG0001544	OG0001544	OG0001544		COG0626	Metabolism
OG0001545	OG0001545	OG0001545	OG0001545	OG0001545	OG0001545	COG2199	Cellular Processes And Signaling
OG0001546	OG0001546	OG0001546	OG0001546	OG0001546	OG0001546	COG1024	Metabolism
OG0001547	OG0001547	OG0001547	OG0001547	OG0001547	OG0001547	COG2114	Cellular Processes And Signaling
OG0001548	OG0001548	OG0001548	OG0001548	OG0001548	OG0001548	COG4799	Metabolism
OG0001549	OG0001549	OG0001549	OG0001549	OG0001549	OG0001549	NA	NA
OG0001550	OG0001550	OG0001550	OG0001550	OG0001550	OG0001550	NA	NA
OG0001551	OG0001551	OG0001551	OG0001551	OG0001551	OG0001551	COG0424	Metabolism
OG0001552	OG0001552	OG0001552	OG0001552	OG0001552	OG0001552	COG1309	Information Storage And Processing
OG0001553	OG0001553	OG0001553	OG0001553	OG0001553	OG0001553	COG1349	Information Storage And Processing;Metabolism
OG0001554	OG0001554	OG0001554	OG0001554	OG0001554	OG0001554	COG2105	Metabolism
OG0001555	OG0001555	OG0001555	OG0001555	OG0001555	OG0001555	COG0005	Metabolism
OG0001556	OG0001556	OG0001556	OG0001556	OG0001556	OG0001556	COG1109	Metabolism
OG0001557	OG0001557	OG0001557	OG0001557	OG0001557	OG0001557	NA	NA
OG0001558	OG0001558	OG0001558	OG0001558	OG0001558	OG0001558	NA	NA
OG0001559	OG0001559	OG0001559	OG0001559	OG0001559	OG0001559	COG1012	Metabolism
OG0001560	OG0001560	OG0001560	OG0001560	OG0001560	OG0001560	COG1012	Metabolism
OG0001561	OG0001561	OG0001561	OG0001561	OG0001561	OG0001561	COG1595	Information Storage And Processing
OG0001562	OG0001562	OG0001562	OG0001562	OG0001562	OG0001562	COG0745	Information Storage And Processing;Cellular Processes And Signaling
OG0001563	OG0001563	OG0001563	OG0001563	OG0001563	OG0001563	COG0642	Cellular Processes And Signaling
OG0001564	OG0001564	OG0001564	OG0001564	OG0001564	OG0001564	NA	NA
OG0001565	OG0001565	OG0001565	OG0001565	OG0001565	OG0001565	COG4767	Cellular Processes And Signaling
OG0001566	OG0001566	OG0001566	OG0001566	OG0001566	OG0001566	COG1983	Cellular Processes And Signaling;Information Storage And Processing
OG0001567	OG0001567	OG0001567	OG0001567	OG0001567	OG0001567	NA	NA
OG0001568	OG0001568	OG0001568	OG0001568	OG0001568	OG0001568	COG0400	Poorly Characterized
OG0001569	OG0001569	OG0001569	OG0001569	OG0001569	OG0001569	COG2814	Metabolism
OG0001570	OG0001570	OG0001570	OG0001570	OG0001570	OG0001570	COG1595	Information Storage And Processing
OG0001571	OG0001571	OG0001571	OG0001571	OG0001571	OG0001571	NA	NA
OG0001572	OG0001572	OG0001572	OG0001572	OG0001572	OG0001572	COG0679	Poorly Characterized
OG0001573	OG0001573	OG0001573	OG0001573	OG0001573	OG0001573	COG0295	Metabolism
OG0001574	OG0001574	OG0001574	OG0001574	OG0001574	OG0001574	COG3845	Metabolism
OG0001575	OG0001575	OG0001575	OG0001575	OG0001575	OG0001575	COG1473	Poorly Characterized
OG0001576	OG0001576	OG0001576	OG0001576	OG0001576	OG0001576	COG2226	Metabolism
OG0001577	OG0001577	OG0001577	OG0001577	OG0001577	OG0001577	NA	NA
OG0001578	OG0001578	OG0001578	OG0001578	OG0001578	OG0001578	COG2089	Cellular Processes And Signaling
OG0001579	OG0001579	OG0001579	OG0001579	OG0001579	OG0001579	COG1778	Cellular Processes And Signaling;Poorly Characterized
OG0001580	OG0001580	OG0001580	OG0001580	OG0001580	OG0001580	NA	NA
OG0001581	OG0001581	OG0001581	OG0001581	OG0001581	OG0001581	COG0463	Cellular Processes And Signaling
OG0001582	OG0001582	OG0001582	OG0001582	OG0001582	OG0001582	NA	NA
OG0001583	OG0001583	OG0001583	OG0001583	OG0001583	OG0001583	COG1835	Cellular Processes And Signaling
OG0001584	OG0001584	OG0001584	OG0001584	OG0001584	OG0001584	NA	NA
OG0001585	OG0001585	OG0001585	OG0001585	OG0001585	OG0001585	COG0463	Cellular Processes And Signaling
OG0001586	OG0001586	OG0001586	OG0001586	OG0001586	OG0001586	COG1309	Information Storage And Processing
OG0001587	OG0001587	OG0001587	OG0001587	OG0001587	OG0001587	COG3409	Cellular Processes And Signaling
OG0001588	OG0001588	OG0001588	OG0001588	OG0001588	OG0001588	COG1595	Information Storage And Processing
OG0001589	OG0001589	OG0001589	OG0001589	OG0001589	OG0001589	NA	NA
OG0001590	OG0001590	OG0001590	OG0001590	OG0001590	OG0001590	NA	NA
OG0001591	OG0001591	OG0001591	OG0001591	OG0001591	OG0001591	NA	NA
OG0001592	OG0001592	OG0001592	OG0001592	OG0001592	OG0001592	NA	NA
OG0001593	OG0001593	OG0001593	OG0001593	OG0001593	OG0001593	COG3525	Metabolism
OG0001594	OG0001594	OG0001594	OG0001594	OG0001594	OG0001594	COG3195	Metabolism
OG0001595	OG0001595	OG0001595	OG0001595	OG0001595	OG0001595	COG2009	Metabolism
OG0001596	OG0001596	OG0001596	OG0001596	OG0001596	OG0001596	COG2142	Metabolism
OG0001597	OG0001597	OG0001597	OG0001597	OG0001597	OG0001597	COG1053	Metabolism
OG0001598	OG0001598	OG0001598	OG0001598	OG0001598	OG0001598	COG0479	Metabolism
OG0001599	OG0001599	OG0001599	OG0001599	OG0001599	OG0001599	NA	NA
OG0001600	OG0001600	OG0001600	OG0001600	OG0001600	OG0001600	COG3324	Poorly Characterized
OG0001601	OG0001601	OG0001601	OG0001601	OG0001601	OG0001601	COG3011	Poorly Characterized
OG0001602	OG0001602	OG0001602	OG0001602	OG0001602	OG0001602	COG1309	Information Storage And Processing
OG0001603	OG0001603	OG0001603	OG0001603	OG0001603	OG0001603	COG1408	Poorly Characterized
OG0001604	OG0001604	OG0001604	OG0001604	OG0001604	OG0001604	COG1295	Poorly Characterized
OG0001605	OG0001605	OG0001605	OG0001605	OG0001605	OG0001605	COG1514	Information Storage And Processing
OG0001606	OG0001606	OG0001606	OG0001606	OG0001606	OG0001606	COG0180	Information Storage And Processing
OG0001607	OG0001607	OG0001607	OG0001607	OG0001607	OG0001607	COG0112	Metabolism
OG0001608	OG0001608	OG0001608	OG0001608	OG0001608	OG0001608	NA	NA
OG0001609	OG0001609	OG0001609	OG0001609	OG0001609	OG0001609	COG0512	Metabolism
OG0001610	OG0001610	OG0001610	OG0001610	OG0001610	OG0001610	COG0365	Metabolism
OG0001611	OG0001611	OG0001611	OG0001611	OG0001611	OG0001611	COG0365	Metabolism
OG0001612	OG0001612	OG0001612	OG0001612	OG0001612	OG0001612	COG0654	Metabolism
OG0001613	OG0001613	OG0001613	OG0001613	OG0001613	OG0001613	COG0115	Metabolism
OG0001614	OG0001614	OG0001614	OG0001614	OG0001614	OG0001614	NA	NA
OG0001615	OG0001615	OG0001615	OG0001615	OG0001615	OG0001615	COG0039	Metabolism
OG0001616	OG0001616	OG0001616	OG0001616	OG0001616	OG0001616	NA	NA
OG0001617	OG0001617	OG0001617	OG0001617	OG0001617	OG0001617	NA	NA
OG0001618	OG0001618	OG0001618	OG0001618	OG0001618	OG0001618	NA	NA
OG0001619	OG0001619	OG0001619	OG0001619	OG0001619	OG0001619	COG0190	Metabolism
OG0001620	OG0001620	OG0001620	OG0001620	OG0001620	OG0001620	COG0138	Metabolism
OG0001621	OG0001621	OG0001621	OG0001621	OG0001621	OG0001621	COG0299	Metabolism
OG0001622	OG0001622	OG0001622	OG0001622	OG0001622	OG0001622	NA	NA
OG0001623	OG0001623	OG0001623	OG0001623	OG0001623	OG0001623	COG2944	Information Storage And Processing
OG0001624	OG0001624	OG0001624	OG0001624	OG0001624	OG0001624	COG0074	Metabolism
OG0001625	OG0001625	OG0001625	OG0001625	OG0001625	OG0001625	COG0045	Metabolism
OG0001626	OG0001626	OG0001626	OG0001626	OG0001626	OG0001626	COG2425	Poorly Characterized
OG0001627	OG0001627	OG0001627	OG0001627	OG0001627	OG0001627	NA	NA
OG0001628	OG0001628	OG0001628	OG0001628	OG0001628	OG0001628	COG0714	Poorly Characterized
OG0001629	OG0001629	OG0001629	OG0001629	OG0001629	OG0001629	NA	NA
OG0001630	OG0001630	OG0001630	OG0001630	OG0001630	OG0001630	NA	NA
OG0001631	OG0001631	OG0001631	OG0001631	OG0001631	OG0001631	COG1075	Metabolism
OG0001632	OG0001632	OG0001632	OG0001632	OG0001632	OG0001632	COG0739	Cellular Processes And Signaling
OG0001633	OG0001633	OG0001633	OG0001633	OG0001633	OG0001633	COG0210	Information Storage And Processing
OG0001634	OG0001634	OG0001634	OG0001634	OG0001634	OG0001634	COG3883	Poorly Characterized
OG0001635	OG0001635	OG0001635	OG0001635	OG0001635	OG0001635	NA	NA
OG0001636	OG0001636	OG0001636	OG0001636	OG0001636	OG0001636	COG3883	Poorly Characterized
OG0001637	OG0001637	OG0001637	OG0001637	OG0001637	OG0001637	COG2197	Cellular Processes And Signaling;Information Storage And Processing
OG0001638	OG0001638	OG0001638	OG0001638	OG0001638	OG0001638	COG4585	Cellular Processes And Signaling
OG0001639	OG0001639	OG0001639	OG0001639	OG0001639	OG0001639	COG1983	Information Storage And Processing;Cellular Processes And Signaling
OG0001640	OG0001640	OG0001640	OG0001640	OG0001640	OG0001640	NA	NA
OG0001641	OG0001641	OG0001641	OG0001641	OG0001641	OG0001641	NA	NA
OG0001642	OG0001642	OG0001642	OG0001642	OG0001642	OG0001642	NA	NA
OG0001643	OG0001643	OG0001643	OG0001643	OG0001643	OG0001643	COG0235	Metabolism
OG0001644	OG0001644	OG0001644	OG0001644	OG0001644	OG0001644	COG0519	Metabolism
OG0001645	OG0001645	OG0001645	OG0001645	OG0001645	OG0001645	COG1605	Metabolism
OG0001646	OG0001646	OG0001646	OG0001646	OG0001646	OG0001646	NA	NA
OG0001647	OG0001647	OG0001647	OG0001647	OG0001647	OG0001647	COG2303	Metabolism;Poorly Characterized
OG0001648	OG0001648	OG0001648	OG0001648	OG0001648	OG0001648	COG1012	Metabolism
OG0001649	OG0001649	OG0001649	OG0001649	OG0001649	OG0001649	NA	NA
OG0001650	OG0001650	OG0001650	OG0001650	OG0001650	OG0001650	NA	NA
OG0001651	OG0001651	OG0001651	OG0001651	OG0001651	OG0001651	COG0515	Cellular Processes And Signaling
OG0001652	OG0001652	OG0001652	OG0001652	OG0001652	OG0001652	COG0515	Cellular Processes And Signaling
OG0001653	OG0001653	OG0001653	OG0001653	OG0001653	OG0001653	COG0578	Metabolism
OG0001654	OG0001654	OG0001654	OG0001654	OG0001654	OG0001654	COG0677	Cellular Processes And Signaling
OG0001655	OG0001655	OG0001655	OG0001655	OG0001655	OG0001655	COG0516	Metabolism
OG0001656	OG0001656	OG0001656	OG0001656	OG0001656	OG0001656	COG0517	Cellular Processes And Signaling
OG0001657	OG0001657	OG0001657	OG0001657	OG0001657	OG0001657	COG1595	Information Storage And Processing
OG0001658	OG0001658	OG0001658	OG0001658	OG0001658	OG0001658	COG2197	Information Storage And Processing;Cellular Processes And Signaling
OG0001659	OG0001659	OG0001659	OG0001659	OG0001659	OG0001659	NA	NA
OG0001660	OG0001660	OG0001660	OG0001660	OG0001660	OG0001660	COG2258	Cellular Processes And Signaling;Metabolism
OG0001661	OG0001661	OG0001661	OG0001661	OG0001661	OG0001661	COG0300	Poorly Characterized
OG0001662	OG0001662	OG0001662	OG0001662	OG0001662	OG0001662	COG0459	Cellular Processes And Signaling
OG0001663	OG0001663	OG0001663	OG0001663	OG0001663	OG0001663	COG0234	Cellular Processes And Signaling
OG0001664	OG0001664	OG0001664	OG0001664	OG0001664	OG0001664	COG0726	Cellular Processes And Signaling;Metabolism
OG0001665	OG0001665	OG0001665	OG0001665	OG0001665	OG0001665	COG0742	Information Storage And Processing
OG0001666	OG0001666	OG0001666	OG0001666	OG0001666	OG0001666	COG4941	Information Storage And Processing
OG0001667	OG0001667	OG0001667	OG0001667	OG0001667	OG0001667	COG3795	Metabolism
OG0001668	OG0001668	OG0001668	OG0001668	OG0001668	OG0001668	COG1316	Cellular Processes And Signaling
OG0001669	OG0001669	OG0001669	OG0001669	OG0001669	OG0001669	COG5297	Metabolism
OG0001670	OG0001670	OG0001670	OG0001670	OG0001670	OG0001670	COG1609	Information Storage And Processing
OG0001671	OG0001671	OG0001671	OG0001671	OG0001671	OG0001671	COG1653	Metabolism
OG0001672	OG0001672	OG0001672	OG0001672	OG0001672	OG0001672	COG1175	Metabolism
OG0001673	OG0001673	OG0001673	OG0001673	OG0001673	OG0001673	COG0395	Metabolism
OG0001674	OG0001674	OG0001674	OG0001674	OG0001674	OG0001674	COG1472	Metabolism
OG0001675	OG0001675	OG0001675	OG0001675	OG0001675	OG0001675	NA	NA
OG0001676	OG0001676	OG0001676	OG0001676	OG0001676	OG0001676	COG1595	Information Storage And Processing
OG0001677	OG0001677	OG0001677	OG0001677	OG0001677	OG0001677	NA	NA
OG0001678	OG0001678	OG0001678	OG0001678	OG0001678	OG0001678	COG0533	Information Storage And Processing
OG0001679	OG0001679	OG0001679	OG0001679	OG0001679	OG0001679	COG0456	Information Storage And Processing
OG0001680	OG0001680	OG0001680	OG0001680	OG0001680	OG0001680	COG1214	Information Storage And Processing
OG0001681	OG0001681	OG0001681	OG0001681	OG0001681	OG0001681	NA	NA
OG0001682	OG0001682	OG0001682	OG0001682	OG0001682	OG0001682	COG0802	Information Storage And Processing
OG0001683	OG0001683	OG0001683	OG0001683	OG0001683	OG0001683	COG0596	Metabolism;Poorly Characterized
OG0001684	OG0001684	OG0001684	OG0001684	OG0001684	OG0001684	COG0787	Cellular Processes And Signaling
OG0001685	OG0001685	OG0001685	OG0001685	OG0001685	OG0001685	COG0736	Metabolism
OG0001686	OG0001686	OG0001686				NA	NA
OG0001687	OG0001687	OG0001687	OG0001687	OG0001687	OG0001687	COG0449	Cellular Processes And Signaling
OG0001688	OG0001688	OG0001688	OG0001688	OG0001688	OG0001688	NA	NA
OG0001689	OG0001689	OG0001689	OG0001689	OG0001689	OG0001689	COG1072	Metabolism
OG0001690	OG0001690	OG0001690	OG0001690	OG0001690	OG0001690	COG1808	Poorly Characterized
OG0001691	OG0001691	OG0001691	OG0001691	OG0001691	OG0001691	COG1109	Metabolism
OG0001692	OG0001692	OG0001692	OG0001692	OG0001692	OG0001692	COG0103	Information Storage And Processing
OG0001693	OG0001693	OG0001693	OG0001693	OG0001693	OG0001693	COG0102	Information Storage And Processing
OG0001694	OG0001694	OG0001694	OG0001694	OG0001694	OG0001694	NA	NA
OG0001695	OG0001695	OG0001695	OG0001695	OG0001695	OG0001695	COG0101	Information Storage And Processing
OG0001696	OG0001696	OG0001696	OG0001696	OG0001696	OG0001696	COG0203	Information Storage And Processing
OG0001697	OG0001697	OG0001697	OG0001697	OG0001697	OG0001697	COG0100	Information Storage And Processing
OG0001698	OG0001698	OG0001698	OG0001698	OG0001698	OG0001698	COG0099	Information Storage And Processing
OG0001699	OG0001699	OG0001699	OG0001699	OG0001699	OG0001699	COG0257	Information Storage And Processing
OG0001700	OG0001700	OG0001700	OG0001700	OG0001700	OG0001700	COG0361	Information Storage And Processing
OG0001701	OG0001701	OG0001701	OG0001701	OG0001701	OG0001701	COG0024	Information Storage And Processing
OG0001702	OG0001702	OG0001702	OG0001702	OG0001702	OG0001702	COG0563	Metabolism
OG0001703	OG0001703	OG0001703	OG0001703	OG0001703	OG0001703	COG0201	Cellular Processes And Signaling
OG0001704	OG0001704	OG0001704	OG0001704	OG0001704	OG0001704	COG0200	Information Storage And Processing
OG0001705	OG0001705	OG0001705	OG0001705	OG0001705	OG0001705	COG1841	Information Storage And Processing
OG0001706	OG0001706	OG0001706	OG0001706	OG0001706	OG0001706	COG0098	Information Storage And Processing
OG0001707	OG0001707	OG0001707	OG0001707	OG0001707	OG0001707	COG0256	Information Storage And Processing
OG0001708	OG0001708	OG0001708	OG0001708	OG0001708	OG0001708	COG0097	Information Storage And Processing
OG0001709	OG0001709	OG0001709	OG0001709	OG0001709	OG0001709	COG0096	Information Storage And Processing
OG0001710	OG0001710	OG0001710	OG0001710	OG0001710	OG0001710	COG0199	Information Storage And Processing
OG0001711	OG0001711	OG0001711	OG0001711	OG0001711	OG0001711	COG0094	Information Storage And Processing
OG0001712	OG0001712	OG0001712	OG0001712	OG0001712	OG0001712	COG0198	Information Storage And Processing
OG0001713	OG0001713	OG0001713	OG0001713	OG0001713	OG0001713	COG0093	Information Storage And Processing
OG0001714	OG0001714	OG0001714	OG0001714	OG0001714	OG0001714	COG0186	Information Storage And Processing
OG0001715	OG0001715	OG0001715	OG0001715	OG0001715	OG0001715	COG0255	Information Storage And Processing
OG0001716	OG0001716	OG0001716	OG0001716	OG0001716	OG0001716	COG0197	Information Storage And Processing
OG0001717	OG0001717	OG0001717	OG0001717	OG0001717	OG0001717	COG0092	Information Storage And Processing
OG0001718	OG0001718	OG0001718	OG0001718	OG0001718	OG0001718	COG0091	Information Storage And Processing
OG0001719	OG0001719	OG0001719	OG0001719	OG0001719	OG0001719	COG0185	Information Storage And Processing
OG0001720	OG0001720	OG0001720	OG0001720	OG0001720	OG0001720	COG0090	Information Storage And Processing
OG0001721	OG0001721	OG0001721	OG0001721	OG0001721	OG0001721	COG0089	Information Storage And Processing
OG0001722	OG0001722	OG0001722	OG0001722	OG0001722	OG0001722	COG0088	Information Storage And Processing
OG0001723	OG0001723	OG0001723	OG0001723	OG0001723	OG0001723	COG0087	Information Storage And Processing
OG0001724	OG0001724	OG0001724	OG0001724	OG0001724	OG0001724	COG0051	Information Storage And Processing
OG0001725	OG0001725	OG0001725	OG0001725	OG0001725	OG0001725	NA	NA
OG0001726	OG0001726	OG0001726	OG0001726	OG0001726	OG0001726	COG0050	Information Storage And Processing
OG0001727	OG0001727	OG0001727	OG0001727	OG0001727	OG0001727	COG0480	Information Storage And Processing
OG0001728	OG0001728	OG0001728	OG0001728	OG0001728	OG0001728	COG0048	Information Storage And Processing
OG0001729	OG0001729	OG0001729	OG0001729	OG0001729	OG0001729	COG0664	Cellular Processes And Signaling
OG0001730	OG0001730	OG0001730	OG0001730	OG0001730	OG0001730	NA	NA
OG0001731	OG0001731	OG0001731	OG0001731	OG0001731	OG0001731	NA	NA
OG0001732	OG0001732	OG0001732	OG0001732	OG0001732	OG0001732	NA	NA
OG0001733	OG0001733	OG0001733	OG0001733	OG0001733		COG3953	Metabolism
OG0001734	OG0001734	OG0001734	OG0001734	OG0001734		COG0561	Poorly Characterized;Metabolism
OG0001735	OG0001735	OG0001735	OG0001735	OG0001735		COG1007	Metabolism
OG0001736	OG0001736	OG0001736	OG0001736	OG0001736	OG0001736	NA	NA
OG0001737	OG0001737	OG0001737	OG0001737	OG0001737	OG0001737	NA	NA
OG0001738	OG0001738	OG0001738	OG0001738	OG0001738	OG0001738	NA	NA
OG0001739	OG0001739	OG0001739	OG0001739	OG0001739	OG0001739	COG4965	Cellular Processes And Signaling
OG0001740	OG0001740	OG0001740	OG0001740	OG0001740	OG0001740	COG4965	Cellular Processes And Signaling
OG0001741	OG0001741	OG0001741	OG0001741	OG0001741	OG0001741	COG4962	Cellular Processes And Signaling
OG0001742	OG0001742	OG0001742	OG0001742	OG0001742	OG0001742	NA	NA
OG0001743	OG0001743	OG0001743	OG0001743	OG0001743	OG0001743	NA	NA
OG0001744	OG0001744		OG0001744	OG0001744	OG0001744	NA	NA
OG0001745	OG0001745	OG0001745	OG0001745	OG0001745	OG0001745	COG1427	Metabolism
OG0001746	OG0001746	OG0001746	OG0001746	OG0001746	OG0001746	COG1278	Information Storage And Processing
OG0001747	OG0001747	OG0001747	OG0001747	OG0001747	OG0001747	COG1053	Metabolism
OG0001748	OG0001748	OG0001748	OG0001748	OG0001748	OG0001748	COG1022	Metabolism
OG0001749	OG0001749	OG0001749	OG0001749	OG0001749	OG0001749	NA	NA
OG0001750	OG0001750	OG0001750	OG0001750	OG0001750	OG0001750	COG0456	Information Storage And Processing
OG0001751	OG0001751	OG0001751	OG0001751	OG0001751	OG0001751	COG1060	Metabolism
OG0001752	OG0001752	OG0001752	OG0001752	OG0001752	OG0001752	COG1522	Information Storage And Processing
OG0001753	OG0001753	OG0001753	OG0001753	OG0001753	OG0001753	COG0163	Metabolism
OG0001754	OG0001754	OG0001754	OG0001754	OG0001754	OG0001754	COG0382	Metabolism
OG0001755	OG0001755	OG0001755	OG0001755	OG0001755	OG0001755	COG0043	Metabolism
OG0001756	OG0001756	OG0001756	OG0001756	OG0001756	OG0001756	NA	NA
OG0001757	OG0001757	OG0001757	OG0001757	OG0001757	OG0001757	COG1960	Metabolism
OG0001758	OG0001758	OG0001758	OG0001758	OG0001758	OG0001758	COG3795	Metabolism
OG0001759	OG0001759	OG0001759	OG0001759	OG0001759	OG0001759	COG4941	Information Storage And Processing
OG0001760	OG0001760	OG0001760			OG0001760	NA	NA
OG0001761	OG0001761	OG0001761	OG0001761	OG0001761	OG0001761	COG0789	Information Storage And Processing
OG0001762	OG0001762	OG0001762	OG0001762	OG0001762	OG0001762	COG0590	Information Storage And Processing
OG0001763	OG0001763	OG0001763	OG0001763	OG0001763	OG0001763	COG3491	Metabolism
OG0001764	OG0001764	OG0001764	OG0001764	OG0001764	OG0001764	NA	NA
OG0001765	OG0001765	OG0001765	OG0001765	OG0001765	OG0001765	NA	NA
OG0001766	OG0001766	OG0001766	OG0001766	OG0001766	OG0001766	COG0755	Cellular Processes And Signaling
OG0001767	OG0001767	OG0001767	OG0001767	OG0001767	OG0001767	COG0785	Metabolism;Cellular Processes And Signaling
OG0001768	OG0001768	OG0001768	OG0001768	OG0001768	OG0001768	COG1225	Cellular Processes And Signaling
OG0001769	OG0001769	OG0001769	OG0001769	OG0001769	OG0001769	NA	NA
OG0001770	OG0001770	OG0001770	OG0001770	OG0001770	OG0001770	COG0406	Metabolism
OG0001771	OG0001771	OG0001771	OG0001771	OG0001771	OG0001771	COG0001	Metabolism
OG0001772	OG0001772	OG0001772	OG0001772	OG0001772	OG0001772	NA	NA
OG0001773	OG0001773	OG0001773		OG0001773	OG0001773	COG1529	Metabolism
OG0001774	OG0001774	OG0001774		OG0001774	OG0001774	COG2080	Metabolism
OG0001775	OG0001775	OG0001775	OG0001775	OG0001775	OG0001775	COG0346	Metabolism
OG0001776	OG0001776	OG0001776	OG0001776	OG0001776	OG0001776	COG1670	Cellular Processes And Signaling;Information Storage And Processing
OG0001777	OG0001777	OG0001777	OG0001777	OG0001777	OG0001777	NA	NA
OG0001778	OG0001778	OG0001778	OG0001778	OG0001778	OG0001778	COG1444	Information Storage And Processing
OG0001779	OG0001779	OG0001779	OG0001779	OG0001779	OG0001779	NA	NA
OG0001780	OG0001780	OG0001780	OG0001780	OG0001780	OG0001780	COG1028	Metabolism
OG0001781	OG0001781	OG0001781	OG0001781	OG0001781	OG0001781	COG4821	Poorly Characterized
OG0001782	OG0001782	OG0001782	OG0001782	OG0001782	OG0001782	NA	NA
OG0001783	OG0001783	OG0001783	OG0001783	OG0001783	OG0001783	COG1175	Metabolism
OG0001784	OG0001784	OG0001784	OG0001784	OG0001784	OG0001784	COG0395	Metabolism
OG0001785	OG0001785	OG0001785	OG0001785	OG0001785		COG5297	Metabolism
OG0001786	OG0001786	OG0001786	OG0001786	OG0001786	OG0001786	NA	NA
OG0001787	OG0001787	OG0001787	OG0001787	OG0001787	OG0001787	COG3896	Cellular Processes And Signaling
OG0001788	OG0001788	OG0001788	OG0001788	OG0001788	OG0001788	COG1472	Metabolism
OG0001789	OG0001789	OG0001789	OG0001789	OG0001789	OG0001789	NA	NA
OG0001790	OG0001790	OG0001790	OG0001790	OG0001790	OG0001790	NA	NA
OG0001791	OG0001791	OG0001791	OG0001791	OG0001791	OG0001791	NA	NA
OG0001792	OG0001792	OG0001792	OG0001792	OG0001792	OG0001792	COG3544	Poorly Characterized
OG0001793	OG0001793	OG0001793	OG0001793	OG0001793	OG0001793	COG0745	Cellular Processes And Signaling;Information Storage And Processing
OG0001794	OG0001794	OG0001794	OG0001794	OG0001794	OG0001794	NA	NA
OG0001795	OG0001795	OG0001795	OG0001795	OG0001795	OG0001795	COG1742	Poorly Characterized
OG0001796	OG0001796	OG0001796	OG0001796	OG0001796	OG0001796	COG4221	Metabolism
OG0001797	OG0001797	OG0001797	OG0001797	OG0001797	OG0001797	COG1690	Information Storage And Processing
OG0001798	OG0001798	OG0001798	OG0001798	OG0001798	OG0001798	NA	NA
OG0001799	OG0001799	OG0001799	OG0001799	OG0001799	OG0001799	NA	NA
OG0001800	OG0001800	OG0001800	OG0001800	OG0001800	OG0001800	COG1384	Information Storage And Processing
OG0001801	OG0001801	OG0001801	OG0001801	OG0001801	OG0001801	COG0018	Information Storage And Processing
OG0001802	OG0001802	OG0001802	OG0001802	OG0001802	OG0001802	NA	NA
OG0001803	OG0001803	OG0001803	OG0001803	OG0001803	OG0001803	COG3315	Metabolism
OG0001804	OG0001804	OG0001804	OG0001804	OG0001804	OG0001804	COG0113	Metabolism
OG0001805	OG0001805	OG0001805	OG0001805	OG0001805	OG0001805	COG0181	Metabolism
OG0001806	OG0001806	OG0001806	OG0001806	OG0001806	OG0001806	COG0373	Metabolism
OG0001807	OG0001807	OG0001807	OG0001807	OG0001807	OG0001807	COG2344	Information Storage And Processing
OG0001808	OG0001808	OG0001808	OG0001808	OG0001808	OG0001808	COG0695	Cellular Processes And Signaling
OG0001809	OG0001809	OG0001809	OG0001809	OG0001809	OG0001809	COG0560	Metabolism
OG0001810	OG0001810	OG0001810	OG0001810	OG0001810	OG0001810	COG1595	Information Storage And Processing
OG0001811	OG0001811	OG0001811	OG0001811	OG0001811	OG0001811	NA	NA
OG0001812	OG0001812	OG0001812	OG0001812	OG0001812	OG0001812	COG0204	Metabolism
OG0001813	OG0001813	OG0001813	OG0001813	OG0001813	OG0001813	COG0451	Cellular Processes And Signaling
OG0001814	OG0001814	OG0001814	OG0001814	OG0001814	OG0001814	NA	NA
OG0001815	OG0001815	OG0001815	OG0001815	OG0001815	OG0001815	COG3311	Metabolism;Information Storage And Processing
OG0001816	OG0001816	OG0001816	OG0001816	OG0001816	OG0001816	NA	NA
OG0001817	OG0001817	OG0001817	OG0001817	OG0001817	OG0001817	COG0123	Metabolism
OG0001818	OG0001818	OG0001818	OG0001818	OG0001818	OG0001818	COG2814	Metabolism
OG0001819	OG0001819	OG0001819	OG0001819	OG0001819	OG0001819	COG0637	Metabolism
OG0001820	OG0001820	OG0001820	OG0001820	OG0001820	OG0001820	COG0842	Cellular Processes And Signaling
OG0001821	OG0001821	OG0001821	OG0001821	OG0001821	OG0001821	COG1131	Cellular Processes And Signaling
OG0001822	OG0001822	OG0001822	OG0001822	OG0001822	OG0001822	COG1194	Information Storage And Processing
OG0001823	OG0001823	OG0001823	OG0001823	OG0001823	OG0001823	COG1595	Information Storage And Processing
OG0001824	OG0001824	OG0001824	OG0001824	OG0001824	OG0001824	NA	NA
OG0001825	OG0001825	OG0001825	OG0001825	OG0001825	OG0001825	COG0745	Information Storage And Processing;Cellular Processes And Signaling
OG0001826	OG0001826	OG0001826	OG0001826	OG0001826	OG0001826	COG2814	Metabolism
OG0001827	OG0001827	OG0001827	OG0001827	OG0001827	OG0001827	COG1309	Information Storage And Processing
OG0001828	OG0001828	OG0001828	OG0001828	OG0001828	OG0001828	COG0739	Cellular Processes And Signaling
OG0001829	OG0001829	OG0001829	OG0001829	OG0001829	OG0001829	COG2503	Poorly Characterized
OG0001830	OG0001830	OG0001830	OG0001830	OG0001830	OG0001830	COG0542	Cellular Processes And Signaling
OG0001831	OG0001831	OG0001831	OG0001831	OG0001831	OG0001831	NA	NA
OG0001832	OG0001832	OG0001832	OG0001832	OG0001832	OG0001832	NA	NA
OG0001833	OG0001833	OG0001833	OG0001833	OG0001833	OG0001833	COG1246	Metabolism
OG0001834	OG0001834	OG0001834	OG0001834	OG0001834	OG0001834	COG3682	Information Storage And Processing
OG0001835	OG0001835	OG0001835	OG0001835	OG0001835	OG0001835	NA	NA
OG0001836	OG0001836	OG0001836	OG0001836	OG0001836	OG0001836	COG1521	Metabolism
OG0001837	OG0001837	OG0001837	OG0001837	OG0001837	OG0001837	COG0029	Metabolism
OG0001838	OG0001838	OG0001838	OG0001838	OG0001838	OG0001838	COG0414	Metabolism
OG0001839	OG0001839	OG0001839	OG0001839	OG0001839	OG0001839	COG5495	Poorly Characterized
OG0001840	OG0001840	OG0001840	OG0001840	OG0001840	OG0001840	COG2008	Metabolism
OG0001841	OG0001841	OG0001841	OG0001841	OG0001841	OG0001841	COG4585	Cellular Processes And Signaling
OG0001842	OG0001842	OG0001842	OG0001842	OG0001842	OG0001842	COG1565	Poorly Characterized
OG0001843	OG0001843	OG0001843	OG0001843	OG0001843	OG0001843	COG0649	Metabolism
OG0001844	OG0001844	OG0001844	OG0001844	OG0001844	OG0001844	COG3402	Poorly Characterized
OG0001845	OG0001845	OG0001845	OG0001845	OG0001845	OG0001845	COG3428	Poorly Characterized
OG0001846	OG0001846	OG0001846	OG0001846	OG0001846	OG0001846	NA	NA
OG0001847	OG0001847	OG0001847	OG0001847	OG0001847	OG0001847	COG0627	Cellular Processes And Signaling
OG0001848	OG0001848	OG0001848	OG0001848	OG0001848	OG0001848	COG2898	Metabolism
OG0001849	OG0001849	OG0001849	OG0001849	OG0001849	OG0001849	COG0294	Metabolism
OG0001850	OG0001850	OG0001850	OG0001850	OG0001850	OG0001850	COG4319	Poorly Characterized
OG0001851	OG0001851	OG0001851	OG0001851	OG0001851	OG0001851	COG1539	Metabolism
OG0001852	OG0001852	OG0001852	OG0001852	OG0001852	OG0001852	COG0801	Metabolism
OG0001853	OG0001853	OG0001853	OG0001853	OG0001853	OG0001853	NA	NA
OG0001854	OG0001854	OG0001854	OG0001854	OG0001854	OG0001854	COG0302	Metabolism
OG0001855	OG0001855	OG0001855	OG0001855	OG0001855	OG0001855	COG0465	Cellular Processes And Signaling
OG0001856	OG0001856	OG0001856	OG0001856	OG0001856	OG0001856	COG0634	Metabolism
OG0001857	OG0001857	OG0001857	OG0001857	OG0001857	OG0001857	COG0037	Information Storage And Processing
OG0001858	OG0001858	OG0001858	OG0001858	OG0001858	OG0001858	COG5282	Cellular Processes And Signaling
OG0001859	OG0001859	OG0001859	OG0001859	OG0001859	OG0001859	COG2027	Cellular Processes And Signaling
OG0001860	OG0001860	OG0001860	OG0001860	OG0001860	OG0001860	COG0221	Metabolism
OG0001861	OG0001861	OG0001861	OG0001861	OG0001861	OG0001861	COG3610	Poorly Characterized
OG0001862	OG0001862	OG0001862	OG0001862	OG0001862	OG0001862	COG0586	Cellular Processes And Signaling
OG0001863	OG0001863	OG0001863	OG0001863	OG0001863	OG0001863	COG0393	Poorly Characterized
OG0001864	OG0001864	OG0001864	OG0001864	OG0001864	OG0001864	COG0789	Information Storage And Processing
OG0001865	OG0001865	OG0001865	OG0001865	OG0001865	OG0001865	COG0076	Metabolism
OG0001866	OG0001866	OG0001866	OG0001866	OG0001866	OG0001866	COG0842	Cellular Processes And Signaling
OG0001867	OG0001867	OG0001867	OG0001867	OG0001867	OG0001867	COG1131	Cellular Processes And Signaling
OG0001868	OG0001868	OG0001868	OG0001868	OG0001868	OG0001868	COG1695	Information Storage And Processing
OG0001869	OG0001869	OG0001869	OG0001869	OG0001869	OG0001869	COG1012	Metabolism
OG0001870	OG0001870	OG0001870	OG0001870	OG0001870	OG0001870	COG1396	Information Storage And Processing
OG0001871	OG0001871	OG0001871	OG0001871	OG0001871	OG0001871	COG2172	Cellular Processes And Signaling
OG0001872	OG0001872	OG0001872	OG0001872	OG0001872	OG0001872	NA	NA
OG0001873	OG0001873	OG0001873	OG0001873	OG0001873	OG0001873	COG0238	Information Storage And Processing
OG0001874	OG0001874	OG0001874	OG0001874	OG0001874	OG0001874	COG0523	Poorly Characterized
OG0001875	OG0001875	OG0001875	OG0001875	OG0001875	OG0001875	COG0254	Information Storage And Processing
OG0001876	OG0001876	OG0001876	OG0001876	OG0001876	OG0001876	COG0267	Information Storage And Processing
OG0001877	OG0001877	OG0001877	OG0001877	OG0001877	OG0001877	COG0227	Information Storage And Processing
OG0001878	OG0001878	OG0001878	OG0001878	OG0001878	OG0001878	COG0199	Information Storage And Processing
OG0001879	OG0001879	OG0001879	OG0001879	OG0001879	OG0001879	NA	NA
OG0001880	OG0001880	OG0001880	OG0001880	OG0001880	OG0001880	COG0542	Cellular Processes And Signaling
OG0001881	OG0001881	OG0001881	OG0001881	OG0001881	OG0001881	COG0749	Information Storage And Processing
OG0001882	OG0001882	OG0001882	OG0001882	OG0001882	OG0001882	NA	NA
OG0001883	OG0001883	OG0001883	OG0001883	OG0001883	OG0001883	NA	NA
OG0001884	OG0001884	OG0001884	OG0001884	OG0001884	OG0001884	COG2208	Information Storage And Processing;Cellular Processes And Signaling
OG0001885	OG0001885	OG0001885	OG0001885	OG0001885	OG0001885	NA	NA
OG0001886	OG0001886	OG0001886	OG0001886	OG0001886	OG0001886	NA	NA
OG0001887	OG0001887		OG0001887	OG0001887	OG0001887	NA	NA
OG0001888	OG0001888	OG0001888	OG0001888	OG0001888	OG0001888	COG0596	Metabolism;Poorly Characterized
OG0001889	OG0001889	OG0001889	OG0001889	OG0001889	OG0001889	COG2812	Information Storage And Processing
OG0001890	OG0001890	OG0001890	OG0001890	OG0001890	OG0001890	COG1754	Poorly Characterized
OG0001891	OG0001891	OG0001891	OG0001891	OG0001891	OG0001891	NA	NA
OG0001892	OG0001892	OG0001892	OG0001892	OG0001892	OG0001892	COG2890	Information Storage And Processing
OG0001893	OG0001893	OG0001893	OG0001893	OG0001893	OG0001893	NA	NA
OG0001894	OG0001894	OG0001894	OG0001894	OG0001894	OG0001894	COG3808	Metabolism
OG0001895	OG0001895	OG0001895	OG0001895	OG0001895	OG0001895	COG2172	Cellular Processes And Signaling
OG0001896	OG0001896	OG0001896	OG0001896	OG0001896	OG0001896	COG1366	Cellular Processes And Signaling
OG0001897	OG0001897	OG0001897	OG0001897	OG0001897	OG0001897	COG1205	Information Storage And Processing
OG0001898	OG0001898	OG0001898	OG0001898	OG0001898	OG0001898	NA	NA
OG0001899	OG0001899	OG0001899	OG0001899	OG0001899	OG0001899	NA	NA
OG0001900	OG0001900	OG0001900	OG0001900	OG0001900	OG0001900	NA	NA
OG0001901	OG0001901	OG0001901	OG0001901	OG0001901	OG0001901	COG4965	Cellular Processes And Signaling
OG0001902	OG0001902	OG0001902	OG0001902	OG0001902	OG0001902	COG4962	Cellular Processes And Signaling
OG0001903	OG0001903	OG0001903	OG0001903	OG0001903	OG0001903	COG0455	Cellular Processes And Signaling
OG0001904	OG0001904	OG0001904	OG0001904	OG0001904	OG0001904	COG0560	Metabolism
OG0001905	OG0001905	OG0001905	OG0001905	OG0001905	OG0001905	COG3177	Information Storage And Processing
OG0001906	OG0001906	OG0001906	OG0001906	OG0001906	OG0001906	NA	NA
OG0001907	OG0001907	OG0001907	OG0001907	OG0001907	OG0001907	COG0659	Metabolism
OG0001908	OG0001908	OG0001908	OG0001908	OG0001908	OG0001908	COG0365	Metabolism
OG0001909	OG0001909	OG0001909	OG0001909	OG0001909	OG0001909	COG3004	Metabolism
OG0001910	OG0001910	OG0001910	OG0001910	OG0001910	OG0001910	NA	NA
OG0001911	OG0001911	OG0001911	OG0001911	OG0001911	OG0001911	COG0596	Poorly Characterized;Metabolism
OG0001912	OG0001912	OG0001912	OG0001912	OG0001912	OG0001912	COG1286	Metabolism;Cellular Processes And Signaling
OG0001913	OG0001913	OG0001913	OG0001913	OG0001913	OG0001913	COG1051	Metabolism
OG0001914	OG0001914	OG0001914	OG0001914	OG0001914	OG0001914	COG0177	Information Storage And Processing
OG0001915	OG0001915	OG0001915	OG0001915	OG0001915	OG0001915	COG0664	Cellular Processes And Signaling
OG0001916	OG0001916	OG0001916	OG0001916	OG0001916	OG0001916	NA	NA
OG0001917	OG0001917	OG0001917	OG0001917	OG0001917	OG0001917	NA	NA
OG0001918	OG0001918	OG0001918	OG0001918	OG0001918	OG0001918	COG0491	Poorly Characterized
OG0001919	OG0001919	OG0001919	OG0001919	OG0001919	OG0001919	NA	NA
OG0001920	OG0001920	OG0001920	OG0001920	OG0001920	OG0001920	COG0251	Cellular Processes And Signaling
OG0001921	OG0001921	OG0001921	OG0001921	OG0001921	OG0001921	NA	NA
OG0001922	OG0001922	OG0001922	OG0001922	OG0001922	OG0001922	COG0003	Metabolism
OG0001923	OG0001923	OG0001923	OG0001923	OG0001923	OG0001923	COG0003	Metabolism
OG0001924	OG0001924	OG0001924	OG0001924	OG0001924	OG0001924	COG0744	Cellular Processes And Signaling
OG0001925	OG0001925	OG0001925	OG0001925	OG0001925	OG0001925	COG1610	Poorly Characterized
OG0001926	OG0001926	OG0001926	OG0001926	OG0001926	OG0001926	COG1408	Poorly Characterized
OG0001927	OG0001927	OG0001927	OG0001927	OG0001927	OG0001927	NA	NA
OG0001928	OG0001928	OG0001928	OG0001928	OG0001928	OG0001928	COG4213	Metabolism
OG0001929	OG0001929	OG0001929	OG0001929	OG0001929	OG0001929	COG1129	Metabolism
OG0001930	OG0001930	OG0001930	OG0001930	OG0001930	OG0001930	COG4214	Metabolism
OG0001931	OG0001931	OG0001931	OG0001931	OG0001931	OG0001931	NA	NA
OG0001932	OG0001932	OG0001932	OG0001932	OG0001932	OG0001932	COG2319	Poorly Characterized
OG0001933	OG0001933	OG0001933		OG0001933	OG0001933	COG0569	Cellular Processes And Signaling;Metabolism
OG0001934	OG0001934	OG0001934	OG0001934	OG0001934	OG0001934	COG1506	Metabolism
OG0001935	OG0001935	OG0001935	OG0001935	OG0001935	OG0001935	NA	NA
OG0001936	OG0001936	OG0001936	OG0001936	OG0001936	OG0001936	COG1595	Information Storage And Processing
OG0001937	OG0001937	OG0001937	OG0001937	OG0001937	OG0001937	COG0136	Metabolism
OG0001938	OG0001938	OG0001938	OG0001938	OG0001938	OG0001938	COG0527	Metabolism
OG0001939	OG0001939	OG0001939	OG0001939	OG0001939	OG0001939	COG0745	Cellular Processes And Signaling;Information Storage And Processing
OG0001940	OG0001940	OG0001940	OG0001940	OG0001940	OG0001940	NA	NA
OG0001941	OG0001941	OG0001941	OG0001941	OG0001941	OG0001941	NA	NA
OG0001942	OG0001942	OG0001942	OG0001942	OG0001942	OG0001942	COG0353	Information Storage And Processing
OG0001943	OG0001943	OG0001943	OG0001943	OG0001943	OG0001943	COG0718	Information Storage And Processing
OG0001944	OG0001944	OG0001944	OG0001944	OG0001944	OG0001944	NA	NA
OG0001945	OG0001945	OG0001945	OG0001945	OG0001945	OG0001945	COG0515	Cellular Processes And Signaling
OG0001946	OG0001946	OG0001946	OG0001946	OG0001946	OG0001946	COG0161	Metabolism
OG0001947	OG0001947	OG0001947	OG0001947	OG0001947	OG0001947	COG1802	Information Storage And Processing
OG0001948	OG0001948	OG0001948	OG0001948	OG0001948	OG0001948	NA	NA
OG0001949	OG0001949	OG0001949	OG0001949	OG0001949	OG0001949	NA	NA
OG0001950	OG0001950	OG0001950	OG0001950	OG0001950	OG0001950	NA	NA
OG0001951	OG0001951	OG0001951	OG0001951	OG0001951	OG0001951	COG0737	Cellular Processes And Signaling;Metabolism
OG0001952	OG0001952	OG0001952	OG0001952	OG0001952	OG0001952	COG0104	Metabolism
OG0001953	OG0001953	OG0001953	OG0001953	OG0001953	OG0001953	COG4303	Metabolism
OG0001954	OG0001954	OG0001954	OG0001954	OG0001954	OG0001954	COG0531	Metabolism
OG0001955	OG0001955	OG0001955	OG0001955	OG0001955	OG0001955	COG2124	Cellular Processes And Signaling;Metabolism
OG0001956	OG0001956	OG0001956	OG0001956	OG0001956	OG0001956	COG2348	Cellular Processes And Signaling
OG0001957	OG0001957	OG0001957	OG0001957	OG0001957	OG0001957	COG2197	Information Storage And Processing;Cellular Processes And Signaling
OG0001958	OG0001958	OG0001958	OG0001958	OG0001958	OG0001958	COG4585	Cellular Processes And Signaling
OG0001959	OG0001959	OG0001959	OG0001959	OG0001959	OG0001959	COG0657	Metabolism
OG0001960	OG0001960	OG0001960	OG0001960	OG0001960	OG0001960	COG3844	Metabolism
OG0001961	OG0001961	OG0001961	OG0001961	OG0001961	OG0001961	COG3483	Metabolism
OG0001962	OG0001962	OG0001962	OG0001962	OG0001962	OG0001962	NA	NA
OG0001963	OG0001963	OG0001963	OG0001963	OG0001963	OG0001963	COG0191	Metabolism
OG0001964	OG0001964	OG0001964	OG0001964	OG0001964	OG0001964	COG0461	Metabolism
OG0001965	OG0001965	OG0001965	OG0001965	OG0001965	OG0001965	COG2017	Metabolism
OG0001966	OG0001966	OG0001966	OG0001966	OG0001966	OG0001966	COG4262	Poorly Characterized
OG0001967	OG0001967	OG0001967	OG0001967	OG0001967	OG0001967	NA	NA
OG0001968	OG0001968	OG0001968	OG0001968	OG0001968	OG0001968	NA	NA
OG0001969	OG0001969	OG0001969	OG0001969	OG0001969	OG0001969	COG0542	Cellular Processes And Signaling
OG0001970	OG0001970	OG0001970	OG0001970	OG0001970	OG0001970	NA	NA
OG0001971	OG0001971	OG0001971	OG0001971	OG0001971	OG0001971	COG2771	Information Storage And Processing
OG0001972	OG0001972	OG0001972	OG0001972	OG0001972	OG0001972	COG2308	Poorly Characterized
OG0001973	OG0001973	OG0001973	OG0001973	OG0001973	OG0001973	COG2307	Poorly Characterized
OG0001974	OG0001974	OG0001974	OG0001974	OG0001974	OG0001974	NA	NA
OG0001975	OG0001975	OG0001975	OG0001975	OG0001975	OG0001975	COG4213	Metabolism
OG0001976	OG0001976	OG0001976	OG0001976	OG0001976	OG0001976	COG0484	Cellular Processes And Signaling
OG0001977	OG0001977	OG0001977	OG0001977	OG0001977	OG0001977	COG0576	Cellular Processes And Signaling
OG0001978	OG0001978	OG0001978	OG0001978	OG0001978	OG0001978	COG0443	Cellular Processes And Signaling
OG0001979	OG0001979	OG0001979	OG0001979	OG0001979	OG0001979	COG0247	Metabolism
OG0001980	OG0001980	OG0001980	OG0001980	OG0001980	OG0001980	NA	NA
OG0001981	OG0001981	OG0001981	OG0001981	OG0001981	OG0001981	NA	NA
OG0001982	OG0001982	OG0001982	OG0001982	OG0001982	OG0001982	NA	NA
OG0001983	OG0001983	OG0001983	OG0001983	OG0001983	OG0001983	COG2236	Metabolism
OG0001984	OG0001984	OG0001984	OG0001984	OG0001984	OG0001984	COG0726	Metabolism;Cellular Processes And Signaling
OG0001985	OG0001985	OG0001985	OG0001985	OG0001985	OG0001985	NA	NA
OG0001986	OG0001986					NA	NA
OG0001987	OG0001987	OG0001987	OG0001987	OG0001987	OG0001987	NA	NA
OG0001988	OG0001988	OG0001988	OG0001988	OG0001988	OG0001988	COG0726	Metabolism;Cellular Processes And Signaling
OG0001989	OG0001989	OG0001989	OG0001989	OG0001989	OG0001989	NA	NA
OG0001990	OG0001990	OG0001990	OG0001990	OG0001990	OG0001990	NA	NA
OG0001991	OG0001991	OG0001991	OG0001991	OG0001991	OG0001991	NA	NA
OG0001992	OG0001992	OG0001992	OG0001992	OG0001992	OG0001992	COG1465	Metabolism
OG0001993	OG0001993	OG0001993	OG0001993	OG0001993	OG0001993	COG0318	Metabolism
OG0001994	OG0001994	OG0001994	OG0001994	OG0001994	OG0001994	COG0304	Metabolism
OG0001995	OG0001995	OG0001995	OG0001995	OG0001995	OG0001995	COG0318	Metabolism
OG0001996	OG0001996	OG0001996	OG0001996	OG0001996	OG0001996	NA	NA
OG0001997	OG0001997	OG0001997	OG0001997	OG0001997	OG0001997	COG0451	Cellular Processes And Signaling
[truncated: 17,057 more rows]

## Sheet: Table S8
Supplementary Table 8. Fatty acid composition. Data for strain S. geranii (JCM 32177T) was acquired previously (Li et al. 2018).
	BCCO 10_0861T DSM 117345T	Streptomyces lacrimifluminis DSM 111125T	Streptomyces reticuliscabei DSM 41804T	Streptomyces turgidiscabies (DSM 41838T)	Streptomyces geranii (JCM 32177T)
iso-C12:0	NA	NA	0.106582	0.131734	NA
C12:0	0.230617	0.167781	0.14949	0.280207	NA
iso-C13:0	0.24312	0.338724	0.213978	0.233805	NA
anteiso-C13:0	0.421389	0.422703	0.414251	0.484444	0.5
C13:0	0.126109	0.113802	0.113454	0.202168	0.5
iso-C14:0	2.95429	4.00114	5.49525	6.25026	5.3
C14:0	2.15628	1.8676	1.89421	2.35157	1.2
iso-C15:0	8.19291	7.61418	5.29466	5.60224	NA
anteiso-C15:0	15.6142	16.1834	16.5823	14.7385	13
C15:1 ω7c	0.241358	0.41561	0.377145	0.413222	NA
C15:0	3.16458	4.26765	3.96803	5.66624	16.1
iso-C16:1 ω7c	1.38124	1.43827	1.35488	2.12677	NA
iso-C16:0	15.1949	12.5731	17.2447	17.8693	19.5
C16:1 ω7c	14.2571	15.9771	12.9485	10.2731	NA
C16:0	19.4603	15.2598	17.4768	20.5807	16.1
iso-C17:1 ω7c	1.97751	1.99011	0.915508	1.17179	NA
anteiso-C17:1 ω7c	1.66558	2.45603	1.51072	1.18682	NA
iso-C17:0	2.26833	1.44377	1.14545	1.17573	NA
anteiso-C17:0	6.42466	6.28612	5.7421	4.9347	6.1
C17:1 ω7c	0.661489	1.60797	1.11829	1.17928	NA
C17:0 cyclo	0.983752	3.03933	1.38571	0.960214	NA
C17:0	0.761897	0.689921	0.712019	1.21747	3.4
iso-C18:1 ω7c	0.0999249	0.101583	0.156236	0.12805	NA
C16:0 3-OH	0.10297	NA	NA	0.154262	NA
anteiso-C18:1 ω7c	0.0977692	0.245326	NA	NA	NA
iso-C18:0	0.10617	NA	0.0830004	0.114972	NA
C18:2 ω6,9c	NA	0.466274	1.4044	NA	NA
C18:1 ω7c	0.730274	0.65404	1.6849	0.228639	NA
C18:1 ω5c	0.24719	0.284399	NA	0.136623	NA
C18:0	0.23402	0.0942856	0.142011	0.20709	NA

## Sheet: Table S9
Supplementary Table 9. Prediction of plant growth promoting traits. Venn´s diagram included.
BCCO 10_0861T (DSM 117345T)			Streptomyces lacrimifluminis (DSM 111125T)			Streptomyces reticuliscabei (DSM 41804T)			Streptomyces turgidiscabies (DSM 41838T)			Streptomyces geranii (JCM 32177T)
Sample	ID	Count	Sample	ID	Count	Sample	ID	Count	Sample	ID	Count	Sample	ID	Count
BCCO_861	PGPT0000065_4600	1	Slacri	PGPT0000065_4600	1	Sreticuliscabiei	PGPT0000065_4600	1	Sturgidiscabies	PGPT0000065_4600	1	Sgeranii	PGPT0000065_4600	1
BCCO_861	PGPT0000065_967	1	Slacri	PGPT0000065_967	1	Sreticuliscabiei	PGPT0000065_967	1	Sturgidiscabies	PGPT0000065_967	1	Sgeranii	PGPT0000075_597	1
BCCO_861	PGPT0000075_528	1	Slacri	PGPT0000075_418	1	Sreticuliscabiei	PGPT0000075_528	1	Sturgidiscabies	PGPT0000075_528	1	Sgeranii	PGPT0000080_266	1
BCCO_861	PGPT0000080_266	1	Slacri	PGPT0000080_21	1	Sreticuliscabiei	PGPT0000080_266	1	Sturgidiscabies	PGPT0000080_266	1	Sgeranii	PGPT0000300_2176	1
BCCO_861	PGPT0000153_1162	1	Slacri	PGPT0000080_266	1	Sreticuliscabiei	PGPT0000280_101	1	Sturgidiscabies	PGPT0000280_101	1	Sgeranii	PGPT0000300_3583	1
BCCO_861	PGPT0000205_98	1	Slacri	PGPT0000153_1162	1	Sreticuliscabiei	PGPT0000300_2118	1	Sturgidiscabies	PGPT0000300_2118	1	Sgeranii	PGPT0000305_333	1
BCCO_861	PGPT0000285_1096	3	Slacri	PGPT0000300_2176	1	Sreticuliscabiei	PGPT0000305_631	2	Sturgidiscabies	PGPT0000305_631	2	Sgeranii	PGPT0000305_582	1
BCCO_861	PGPT0000300_197	1	Slacri	PGPT0000300_3437	1	Sreticuliscabiei	PGPT0000390_1200	1	Sturgidiscabies	PGPT0000390_1200	1	Sgeranii	PGPT0000305_610	1
BCCO_861	PGPT0000300_2150	1	Slacri	PGPT0000305_631	2	Sreticuliscabiei	PGPT0000395_205	1	Sturgidiscabies	PGPT0000395_205	1	Sgeranii	PGPT0000305_631	2
BCCO_861	PGPT0000300_2438	1	Slacri	PGPT0000305_69	1	Sreticuliscabiei	PGPT0000400_137	1	Sturgidiscabies	PGPT0000400_137	1	Sgeranii	PGPT0000370_608	1
BCCO_861	PGPT0000300_2538	2	Slacri	PGPT0000390_1200	1	Sreticuliscabiei	PGPT0000400_199	1	Sturgidiscabies	PGPT0000400_199	1	Sgeranii	PGPT0000390_1200	1
BCCO_861	PGPT0000305_1	1	Slacri	PGPT0000395_205	1	Sreticuliscabiei	PGPT0000400_9	2	Sturgidiscabies	PGPT0000400_9	1	Sgeranii	PGPT0000395_205	1
BCCO_861	PGPT0000305_517	1	Slacri	PGPT0000400_199	1	Sreticuliscabiei	PGPT0000430_1297	1	Sturgidiscabies	PGPT0000430_1297	1	Sgeranii	PGPT0000400_137	1
BCCO_861	PGPT0000370_831	1	Slacri	PGPT0000400_22	1	Sreticuliscabiei	PGPT0000430_2552	1	Sturgidiscabies	PGPT0000430_2552	1	Sgeranii	PGPT0000400_19	1
BCCO_861	PGPT0000390_1200	1	Slacri	PGPT0000400_9	1	Sreticuliscabiei	PGPT0000430_4103	1	Sturgidiscabies	PGPT0000430_3878	1	Sgeranii	PGPT0000430_1297	1
BCCO_861	PGPT0000390_1505	1	Slacri	PGPT0000430_4180	1	Sreticuliscabiei	PGPT0000430_4341	1	Sturgidiscabies	PGPT0000430_4341	1	Sgeranii	PGPT0000430_2552	1
BCCO_861	PGPT0000395_149	1	Slacri	PGPT0000430_4291	1	Sreticuliscabiei	PGPT0000430_4344	1	Sturgidiscabies	PGPT0000430_4344	1	Sgeranii	PGPT0000430_4193	1
BCCO_861	PGPT0000395_203	1	Slacri	PGPT0000445_8	1	Sreticuliscabiei	PGPT0000445_8	2	Sturgidiscabies	PGPT0000445_8	2	Sgeranii	PGPT0000430_4303	1
BCCO_861	PGPT0000400_12	1	Slacri	PGPT0000445_9	1	Sreticuliscabiei	PGPT0000450_369	1	Sturgidiscabies	PGPT0000450_369	1	Sgeranii	PGPT0000445_8	1
BCCO_861	PGPT0000400_14	1	Slacri	PGPT0000450_355	1	Sreticuliscabiei	PGPT0000455_770	1	Sturgidiscabies	PGPT0000455_770	1	Sgeranii	PGPT0000450_325	1
BCCO_861	PGPT0000400_20	1	Slacri	PGPT0000455_855	1	Sreticuliscabiei	PGPT0000483_21	1	Sturgidiscabies	PGPT0000483_21	1	Sgeranii	PGPT0000455_770	1
BCCO_861	PGPT0000400_853	1	Slacri	PGPT0000520_1542	1	Sreticuliscabiei	PGPT0000520_1045	1	Sturgidiscabies	PGPT0000520_1045	1	Sgeranii	PGPT0000471_57	1
BCCO_861	PGPT0000430_4200	1	Slacri	PGPT0000520_259	1	Sreticuliscabiei	PGPT0000520_1542	1	Sturgidiscabies	PGPT0000520_1542	1	Sgeranii	PGPT0000520_1330	1
BCCO_861	PGPT0000430_4303	1	Slacri	PGPT0000525_34	1	Sreticuliscabiei	PGPT0000525_34	1	Sturgidiscabies	PGPT0000525_34	1	Sgeranii	PGPT0000520_1542	1
BCCO_861	PGPT0000445_8	1	Slacri	PGPT0000530_187	2	Sreticuliscabiei	PGPT0000530_187	3	Sturgidiscabies	PGPT0000530_187	2	Sgeranii	PGPT0000525_34	1
BCCO_861	PGPT0000445_9	1	Slacri	PGPT0000530_19	1	Sreticuliscabiei	PGPT0000530_19	1	Sturgidiscabies	PGPT0000530_19	1	Sgeranii	PGPT0000530_187	3
BCCO_861	PGPT0000450_2785	1	Slacri	PGPT0000530_260	1	Sreticuliscabiei	PGPT0000530_27	1	Sturgidiscabies	PGPT0000530_27	1	Sgeranii	PGPT0000530_19	1
BCCO_861	PGPT0000450_338	1	Slacri	PGPT0000530_27	1	Sreticuliscabiei	PGPT0000530_68	1	Sturgidiscabies	PGPT0000530_68	1	Sgeranii	PGPT0000530_27	1
BCCO_861	PGPT0000450_355	1	Slacri	PGPT0000530_94	1	Sreticuliscabiei	PGPT0000550_1328	1	Sturgidiscabies	PGPT0000550_1328	1	Sgeranii	PGPT0000530_68	1
BCCO_861	PGPT0000455_927	1	Slacri	PGPT0000550_1161	1	Sreticuliscabiei	PGPT0000550_1436	1	Sturgidiscabies	PGPT0000550_1436	1	Sgeranii	PGPT0000530_72	1
BCCO_861	PGPT0000471_56	1	Slacri	PGPT0000550_1571	1	Sreticuliscabiei	PGPT0000550_1521	1	Sturgidiscabies	PGPT0000550_1521	1	Sgeranii	PGPT0000550_1161	1
BCCO_861	PGPT0000500_64	2	Slacri	PGPT0000550_1732	1	Sreticuliscabiei	PGPT0000550_1522	1	Sturgidiscabies	PGPT0000550_1522	1	Sgeranii	PGPT0000550_1252	1
BCCO_861	PGPT0000505_405	1	Slacri	PGPT0000550_1795	2	Sreticuliscabiei	PGPT0000550_1795	1	Sturgidiscabies	PGPT0000550_1605	1	Sgeranii	PGPT0000550_1571	1
BCCO_861	PGPT0000510_995	1	Slacri	PGPT0000550_276	1	Sreticuliscabiei	PGPT0000550_276	1	Sturgidiscabies	PGPT0000550_1795	1	Sgeranii	PGPT0000550_1573	1
BCCO_861	PGPT0000520_259	1	Slacri	PGPT0000550_362	1	Sreticuliscabiei	PGPT0000550_362	1	Sturgidiscabies	PGPT0000550_266	1	Sgeranii	PGPT0000550_1794	1
BCCO_861	PGPT0000525_27	1	Slacri	PGPT0000550_433	1	Sreticuliscabiei	PGPT0000550_414	1	Sturgidiscabies	PGPT0000550_276	1	Sgeranii	PGPT0000550_276	1
BCCO_861	PGPT0000525_34	1	Slacri	PGPT0000550_474	1	Sreticuliscabiei	PGPT0000550_501	1	Sturgidiscabies	PGPT0000550_362	1	Sgeranii	PGPT0000550_369	1
BCCO_861	PGPT0000530_187	6	Slacri	PGPT0000550_544	1	Sreticuliscabiei	PGPT0000550_544	1	Sturgidiscabies	PGPT0000550_414	1	Sgeranii	PGPT0000550_410	1
BCCO_861	PGPT0000530_27	1	Slacri	PGPT0000550_563	1	Sreticuliscabiei	PGPT0000550_563	1	Sturgidiscabies	PGPT0000550_501	1	Sgeranii	PGPT0000550_474	1
BCCO_861	PGPT0000530_72	1	Slacri	PGPT0000550_569	1	Sreticuliscabiei	PGPT0000550_565	1	Sturgidiscabies	PGPT0000550_544	1	Sgeranii	PGPT0000550_544	1
BCCO_861	PGPT0000550_1154	1	Slacri	PGPT0000550_692	1	Sreticuliscabiei	PGPT0000550_569	1	Sturgidiscabies	PGPT0000550_563	1	Sgeranii	PGPT0000550_569	1
BCCO_861	PGPT0000550_135	1	Slacri	PGPT0000550_709	1	Sreticuliscabiei	PGPT0000550_692	1	Sturgidiscabies	PGPT0000550_569	1	Sgeranii	PGPT0000550_660	1
BCCO_861	PGPT0000550_1425	1	Slacri	PGPT0000550_762	1	Sreticuliscabiei	PGPT0000550_914	1	Sturgidiscabies	PGPT0000550_692	1	Sgeranii	PGPT0000550_692	1
BCCO_861	PGPT0000550_149	1	Slacri	PGPT0000550_922	1	Sreticuliscabiei	PGPT0000550_922	1	Sturgidiscabies	PGPT0000550_914	1	Sgeranii	PGPT0000550_777	1
BCCO_861	PGPT0000550_1542	1	Slacri	PGPT0000605_516	1	Sreticuliscabiei	PGPT0000605_516	1	Sturgidiscabies	PGPT0000550_922	1	Sgeranii	PGPT0000550_789	1
BCCO_861	PGPT0000550_1777	2	Slacri	PGPT0000610_745	1	Sreticuliscabiei	PGPT0000610_745	1	Sturgidiscabies	PGPT0000605_516	1	Sgeranii	PGPT0000550_852	1
BCCO_861	PGPT0000550_276	1	Slacri	PGPT0000623_38	1	Sreticuliscabiei	PGPT0000635_1135	1	Sturgidiscabies	PGPT0000610_745	1	Sgeranii	PGPT0000550_922	1
BCCO_861	PGPT0000550_544	1	Slacri	PGPT0000635_1135	1	Sreticuliscabiei	PGPT0000640_1838	1	Sturgidiscabies	PGPT0000635_1135	1	Sgeranii	PGPT0000560_350	1
BCCO_861	PGPT0000550_563	1	Slacri	PGPT0000640_1864	1	Sreticuliscabiei	PGPT0000640_585	1	Sturgidiscabies	PGPT0000640_1838	1	Sgeranii	PGPT0000580_522	1
BCCO_861	PGPT0000550_569	1	Slacri	PGPT0000640_585	1	Sreticuliscabiei	PGPT0000645_10838	1	Sturgidiscabies	PGPT0000640_585	1	Sgeranii	PGPT0000602_1	1
BCCO_861	PGPT0000550_660	1	Slacri	PGPT0000645_10838	1	Sreticuliscabiei	PGPT0000645_4016	1	Sturgidiscabies	PGPT0000645_10838	1	Sgeranii	PGPT0000605_516	1
BCCO_861	PGPT0000550_692	1	Slacri	PGPT0000645_4128	1	Sreticuliscabiei	PGPT0000645_5370	1	Sturgidiscabies	PGPT0000645_4016	1	Sgeranii	PGPT0000610_1057	1
BCCO_861	PGPT0000550_724	1	Slacri	PGPT0000645_5338	1	Sreticuliscabiei	PGPT0000645_6150	1	Sturgidiscabies	PGPT0000645_5338	1	Sgeranii	PGPT0000623_158	1
BCCO_861	PGPT0000550_885	1	Slacri	PGPT0000645_6089	1	Sreticuliscabiei	PGPT0000645_6500	1	Sturgidiscabies	PGPT0000645_6082	1	Sgeranii	PGPT0000635_1135	1
BCCO_861	PGPT0000550_922	1	Slacri	PGPT0000645_6681	1	Sreticuliscabiei	PGPT0000645_6644	1	Sturgidiscabies	PGPT0000645_6150	1	Sgeranii	PGPT0000635_32	1
BCCO_861	PGPT0000580_508	1	Slacri	PGPT0000650_1679	1	Sreticuliscabiei	PGPT0000645_6950	1	Sturgidiscabies	PGPT0000645_6644	1	Sgeranii	PGPT0000635_3746	1
BCCO_861	PGPT0000602_1	1	Slacri	PGPT0000650_1730	1	Sreticuliscabiei	PGPT0000645_7468	1	Sturgidiscabies	PGPT0000645_6950	1	Sgeranii	PGPT0000640_1838	1
BCCO_861	PGPT0000605_516	1	Slacri	PGPT0000655_643	1	Sreticuliscabiei	PGPT0000646_51	1	Sturgidiscabies	PGPT0000646_51	1	Sgeranii	PGPT0000640_579	1
BCCO_861	PGPT0000610_745	1	Slacri	PGPT0000660_2322	1	Sreticuliscabiei	PGPT0000647_174	1	Sturgidiscabies	PGPT0000647_174	1	Sgeranii	PGPT0000645_10835	1
BCCO_861	PGPT0000635_1016	1	Slacri	PGPT0000695_2152	1	Sreticuliscabiei	PGPT0000650_1640	1	Sturgidiscabies	PGPT0000650_1640	1	Sgeranii	PGPT0000645_1686	1
BCCO_861	PGPT0000635_1972	1	Slacri	PGPT0000770_498	1	Sreticuliscabiei	PGPT0000650_1679	1	Sturgidiscabies	PGPT0000650_1679	1	Sgeranii	PGPT0000645_3882	1
BCCO_861	PGPT0000635_815	1	Slacri	PGPT0000775_265	1	Sreticuliscabiei	PGPT0000655_643	1	Sturgidiscabies	PGPT0000655_643	1	Sgeranii	PGPT0000645_5117	1
BCCO_861	PGPT0000640_1838	1	Slacri	PGPT0000780_248	1	Sreticuliscabiei	PGPT0000660_2322	1	Sturgidiscabies	PGPT0000660_2322	1	Sgeranii	PGPT0000645_5370	1
BCCO_861	PGPT0000640_579	1	Slacri	PGPT0000785_224	1	Sreticuliscabiei	PGPT0000695_2143	1	Sturgidiscabies	PGPT0000695_2143	1	Sgeranii	PGPT0000645_6089	1
BCCO_861	PGPT0000645_10838	1	Slacri	PGPT0000785_314	1	Sreticuliscabiei	PGPT0000711_32	1	Sturgidiscabies	PGPT0000711_32	1	Sgeranii	PGPT0000645_6950	1
BCCO_861	PGPT0000645_4044	1	Slacri	PGPT0000815_1640	1	Sreticuliscabiei	PGPT0000711_37	1	Sturgidiscabies	PGPT0000711_37	1	Sgeranii	PGPT0000646_51	1
BCCO_861	PGPT0000645_5338	1	Slacri	PGPT0000815_249	1	Sreticuliscabiei	PGPT0000770_571	1	Sturgidiscabies	PGPT0000770_571	1	Sgeranii	PGPT0000646_9	1
BCCO_861	PGPT0000645_5785	1	Slacri	PGPT0000835_1181	1	Sreticuliscabiei	PGPT0000775_230	1	Sturgidiscabies	PGPT0000775_230	1	Sgeranii	PGPT0000647_174	1
BCCO_861	PGPT0000645_6181	1	Slacri	PGPT0000840_3844	1	Sreticuliscabiei	PGPT0000780_248	1	Sturgidiscabies	PGPT0000780_248	1	Sgeranii	PGPT0000647_247	1
BCCO_861	PGPT0000645_6292	1	Slacri	PGPT0000855_64	1	Sreticuliscabiei	PGPT0000785_224	1	Sturgidiscabies	PGPT0000785_224	1	Sgeranii	PGPT0000650_1640	1
BCCO_861	PGPT0000645_6681	1	Slacri	PGPT0000860_8	1	Sreticuliscabiei	PGPT0000785_314	1	Sturgidiscabies	PGPT0000785_314	1	Sgeranii	PGPT0000650_1679	1
BCCO_861	PGPT0000645_6950	1	Slacri	PGPT0000870_1074	1	Sreticuliscabiei	PGPT0000815_533	1	Sturgidiscabies	PGPT0000815_533	1	Sgeranii	PGPT0000655_643	1
BCCO_861	PGPT0000645_9565	1	Slacri	PGPT0000880_318	1	Sreticuliscabiei	PGPT0000835_1142	1	Sturgidiscabies	PGPT0000835_1142	1	Sgeranii	PGPT0000660_2322	1
BCCO_861	PGPT0000646_51	1	Slacri	PGPT0000900_175	1	Sreticuliscabiei	PGPT0000835_1178	1	Sturgidiscabies	PGPT0000835_1178	1	Sgeranii	PGPT0000695_2155	1
BCCO_861	PGPT0000647_174	1	Slacri	PGPT0000900_2	1	Sreticuliscabiei	PGPT0000840_3971	1	Sturgidiscabies	PGPT0000840_3971	1	Sgeranii	PGPT0000770_573	1
BCCO_861	PGPT0000650_1679	1	Slacri	PGPT0000900_81	1	Sreticuliscabiei	PGPT0000840_4630	1	Sturgidiscabies	PGPT0000840_4630	1	Sgeranii	PGPT0000775_347	1
BCCO_861	PGPT0000650_1730	1	Slacri	PGPT0000900_97	1	Sreticuliscabiei	PGPT0000855_377	1	Sturgidiscabies	PGPT0000855_377	1	Sgeranii	PGPT0000780_317	1
BCCO_861	PGPT0000655_584	1	Slacri	PGPT0000910_171	1	Sreticuliscabiei	PGPT0000870_1057	1	Sturgidiscabies	PGPT0000860_8	1	Sgeranii	PGPT0000780_339	1
BCCO_861	PGPT0000655_643	1	Slacri	PGPT0000910_230	1	Sreticuliscabiei	PGPT0000880_318	1	Sturgidiscabies	PGPT0000870_1057	1	Sgeranii	PGPT0000785_224	1
BCCO_861	PGPT0000660_2322	1	Slacri	PGPT0000910_238	1	Sreticuliscabiei	PGPT0000895_1083	1	Sturgidiscabies	PGPT0000880_318	1	Sgeranii	PGPT0000785_314	1
BCCO_861	PGPT0000660_2325	1	Slacri	PGPT0000925_10	2	Sreticuliscabiei	PGPT0000900_167	1	Sturgidiscabies	PGPT0000895_1083	1	Sgeranii	PGPT0000815_1640	1
BCCO_861	PGPT0000695_2143	1	Slacri	PGPT0000925_12	1	Sreticuliscabiei	PGPT0000900_175	1	Sturgidiscabies	PGPT0000900_167	1	Sgeranii	PGPT0000835_1167	1
BCCO_861	PGPT0000770_257	1	Slacri	PGPT0000925_1671	1	Sreticuliscabiei	PGPT0000900_2	1	Sturgidiscabies	PGPT0000900_175	1	Sgeranii	PGPT0000835_1178	1
BCCO_861	PGPT0000770_517	1	Slacri	PGPT0000925_18	1	Sreticuliscabiei	PGPT0000900_26	1	Sturgidiscabies	PGPT0000900_2	1	Sgeranii	PGPT0000840_3971	1
BCCO_861	PGPT0000775_299	1	Slacri	PGPT0000925_4	1	Sreticuliscabiei	PGPT0000900_3	1	Sturgidiscabies	PGPT0000900_26	1	Sgeranii	PGPT0000840_4355	1
BCCO_861	PGPT0000780_257	1	Slacri	PGPT0000925_8	1	Sreticuliscabiei	PGPT0000900_97	1	Sturgidiscabies	PGPT0000900_3	1	Sgeranii	PGPT0000855_258	1
BCCO_861	PGPT0000780_337	1	Slacri	PGPT0000925_9	1	Sreticuliscabiei	PGPT0000905_171	1	Sturgidiscabies	PGPT0000900_97	1	Sgeranii	PGPT0000860_8	2
BCCO_861	PGPT0000785_224	1	Slacri	PGPT0000955_788	1	Sreticuliscabiei	PGPT0000910_230	1	Sturgidiscabies	PGPT0000905_171	1	Sgeranii	PGPT0000870_1057	1
BCCO_861	PGPT0000785_314	1	Slacri	PGPT0000960_964	1	Sreticuliscabiei	PGPT0000910_234	1	Sturgidiscabies	PGPT0000910_230	1	Sgeranii	PGPT0000880_318	1
BCCO_861	PGPT0000815_249	1	Slacri	PGPT0000965_407	1	Sreticuliscabiei	PGPT0000910_238	2	Sturgidiscabies	PGPT0000910_234	1	Sgeranii	PGPT0000895_1083	1
BCCO_861	PGPT0000815_406	1	Slacri	PGPT0000970_1998	1	Sreticuliscabiei	PGPT0000910_28	1	Sturgidiscabies	PGPT0000910_238	2	Sgeranii	PGPT0000900_123	1
BCCO_861	PGPT0000815_410	1	Slacri	PGPT0000980_918	1	Sreticuliscabiei	PGPT0000925_1671	1	Sturgidiscabies	PGPT0000910_28	1	Sgeranii	PGPT0000900_137	1
BCCO_861	PGPT0000815_673	1	Slacri	PGPT0000985_520	1	Sreticuliscabiei	PGPT0000925_18	1	Sturgidiscabies	PGPT0000925_10	1	Sgeranii	PGPT0000900_167	1
BCCO_861	PGPT0000835_1181	1	Slacri	PGPT0001000_1656	1	Sreticuliscabiei	PGPT0000925_9	2	Sturgidiscabies	PGPT0000925_1671	1	Sgeranii	PGPT0000900_175	1
BCCO_861	PGPT0000840_3844	1	Slacri	PGPT0001000_385	1	Sreticuliscabiei	PGPT0000955_555	1	Sturgidiscabies	PGPT0000925_18	1	Sgeranii	PGPT0000900_178	1
BCCO_861	PGPT0000855_221	1	Slacri	PGPT0001005_730	1	Sreticuliscabiei	PGPT0000960_964	1	Sturgidiscabies	PGPT0000925_9	2	Sgeranii	PGPT0000900_22	1
BCCO_861	PGPT0000855_258	1	Slacri	PGPT0001010_1	1	Sreticuliscabiei	PGPT0000965_1192	1	Sturgidiscabies	PGPT0000955_555	1	Sgeranii	PGPT0000900_28	1
BCCO_861	PGPT0000855_64	1	Slacri	PGPT0001010_761	1	Sreticuliscabiei	PGPT0000965_407	1	Sturgidiscabies	PGPT0000960_964	1	Sgeranii	PGPT0000900_3	1
BCCO_861	PGPT0000860_8	1	Slacri	PGPT0001010_841	2	Sreticuliscabiei	PGPT0000970_1946	1	Sturgidiscabies	PGPT0000965_1192	1	Sgeranii	PGPT0000900_6	1
BCCO_861	PGPT0000870_1074	1	Slacri	PGPT0001035_1415	1	Sreticuliscabiei	PGPT0000980_1597	1	Sturgidiscabies	PGPT0000965_407	1	Sgeranii	PGPT0000900_80	1
BCCO_861	PGPT0000870_1095	1	Slacri	PGPT0001040_2548	1	Sreticuliscabiei	PGPT0000985_520	1	Sturgidiscabies	PGPT0000970_1946	1	Sgeranii	PGPT0000910_185	1
BCCO_861	PGPT0000880_318	1	Slacri	PGPT0001065_124	1	Sreticuliscabiei	PGPT0001000_1228	1	Sturgidiscabies	PGPT0000980_1597	1	Sgeranii	PGPT0000910_230	1
BCCO_861	PGPT0000895_1018	1	Slacri	PGPT0001065_15	1	Sreticuliscabiei	PGPT0001000_379	1	Sturgidiscabies	PGPT0000985_520	1	Sgeranii	PGPT0000910_238	2
BCCO_861	PGPT0000900_123	1	Slacri	PGPT0001065_603	1	Sreticuliscabiei	PGPT0001005_730	1	Sturgidiscabies	PGPT0001000_1609	1	Sgeranii	PGPT0000910_37	1
BCCO_861	PGPT0000900_175	1	Slacri	PGPT0001115_1459	1	Sreticuliscabiei	PGPT0001010_1	1	Sturgidiscabies	PGPT0001000_1656	1	Sgeranii	PGPT0000910_64	1
BCCO_861	PGPT0000900_22	1	Slacri	PGPT0001115_367	1	Sreticuliscabiei	PGPT0001010_798	1	Sturgidiscabies	PGPT0001000_369	1	Sgeranii	PGPT0000915_466	1
BCCO_861	PGPT0000900_23	1	Slacri	PGPT0001135_1002	1	Sreticuliscabiei	PGPT0001010_800	1	Sturgidiscabies	PGPT0001000_379	1	Sgeranii	PGPT0000920_179	1
BCCO_861	PGPT0000910_101	1	Slacri	PGPT0001135_1111	1	Sreticuliscabiei	PGPT0001010_841	2	Sturgidiscabies	PGPT0001005_717	1	Sgeranii	PGPT0000925_10	1
BCCO_861	PGPT0000910_238	2	Slacri	PGPT0001135_7253	1	Sreticuliscabiei	PGPT0001030_2030	1	Sturgidiscabies	PGPT0001005_730	1	Sgeranii	PGPT0000925_12	1
BCCO_861	PGPT0000915_466	1	Slacri	PGPT0001135_7533	1	Sreticuliscabiei	PGPT0001035_1415	1	Sturgidiscabies	PGPT0001010_1	1	Sgeranii	PGPT0000925_13	1
BCCO_861	PGPT0000920_155	1	Slacri	PGPT0001140_1695	1	Sreticuliscabiei	PGPT0001035_888	2	Sturgidiscabies	PGPT0001010_793	1	Sgeranii	PGPT0000925_1361	1
BCCO_861	PGPT0000920_179	1	Slacri	PGPT0001140_2172	1	Sreticuliscabiei	PGPT0001040_2548	1	Sturgidiscabies	PGPT0001010_800	1	Sgeranii	PGPT0000925_1671	1
BCCO_861	PGPT0000925_10	2	Slacri	PGPT0001140_3	1	Sreticuliscabiei	PGPT0001040_2998	1	Sturgidiscabies	PGPT0001010_841	2	Sgeranii	PGPT0000925_18	1
BCCO_861	PGPT0000925_1367	1	Slacri	PGPT0001140_5434	1	Sreticuliscabiei	PGPT0001065_124	1	Sturgidiscabies	PGPT0001030_2030	1	Sgeranii	PGPT0000925_1951	1
BCCO_861	PGPT0000925_1671	1	Slacri	PGPT0001145_1736	1	Sreticuliscabiei	PGPT0001065_15	1	Sturgidiscabies	PGPT0001035_1415	1	Sgeranii	PGPT0000925_4	1
BCCO_861	PGPT0000925_18	1	Slacri	PGPT0001145_3385	1	Sreticuliscabiei	PGPT0001065_339	1	Sturgidiscabies	PGPT0001035_888	2	Sgeranii	PGPT0000925_8	2
BCCO_861	PGPT0000925_1951	1	Slacri	PGPT0001145_7316	2	Sreticuliscabiei	PGPT0001065_603	1	Sturgidiscabies	PGPT0001040_2548	1	Sgeranii	PGPT0000925_9	1
BCCO_861	PGPT0000925_4	1	Slacri	PGPT0001160_1051	1	Sreticuliscabiei	PGPT0001065_61	1	Sturgidiscabies	PGPT0001040_2998	1	Sgeranii	PGPT0000930_1432	1
BCCO_861	PGPT0000925_8	1	Slacri	PGPT0001160_1284	1	Sreticuliscabiei	PGPT0001115_1050	1	Sturgidiscabies	PGPT0001065_124	1	Sgeranii	PGPT0000935_954	1
BCCO_861	PGPT0000930_1432	1	Slacri	PGPT0001160_1352	2	Sreticuliscabiei	PGPT0001115_1721	1	Sturgidiscabies	PGPT0001065_15	1	Sgeranii	PGPT0000940_761	1
BCCO_861	PGPT0000935_954	1	Slacri	PGPT0001160_842	1	Sreticuliscabiei	PGPT0001135_1023	1	Sturgidiscabies	PGPT0001065_252	1	Sgeranii	PGPT0000945_1330	1
BCCO_861	PGPT0000940_761	1	Slacri	PGPT0001165_1937	1	Sreticuliscabiei	PGPT0001135_288	1	Sturgidiscabies	PGPT0001065_339	1	Sgeranii	PGPT0000955_788	1
BCCO_861	PGPT0000945_1330	1	Slacri	PGPT0001170_1326	1	Sreticuliscabiei	PGPT0001135_42	1	Sturgidiscabies	PGPT0001065_603	1	Sgeranii	PGPT0000960_964	1
BCCO_861	PGPT0000955_570	1	Slacri	PGPT0001170_5369	1	Sreticuliscabiei	PGPT0001135_7253	1	Sturgidiscabies	PGPT0001115_1050	1	Sgeranii	PGPT0000965_407	1
BCCO_861	PGPT0000960_964	1	Slacri	PGPT0001175_228	1	Sreticuliscabiei	PGPT0001135_7533	1	Sturgidiscabies	PGPT0001115_1494	1	Sgeranii	PGPT0000970_1997	1
BCCO_861	PGPT0000965_407	1	Slacri	PGPT0001175_254	1	Sreticuliscabiei	PGPT0001140_1695	1	Sturgidiscabies	PGPT0001115_1721	1	Sgeranii	PGPT0000980_918	1
BCCO_861	PGPT0000970_1917	1	Slacri	PGPT0001175_403	1	Sreticuliscabiei	PGPT0001140_2172	1	Sturgidiscabies	PGPT0001135_1023	1	Sgeranii	PGPT0000985_530	1
BCCO_861	PGPT0000980_1590	1	Slacri	PGPT0001175_79	1	Sreticuliscabiei	PGPT0001140_3	2	Sturgidiscabies	PGPT0001135_288	1	Sgeranii	PGPT0001000_1656	1
BCCO_861	PGPT0000985_520	1	Slacri	PGPT0001180_1	1	Sreticuliscabiei	PGPT0001140_4898	1	Sturgidiscabies	PGPT0001135_42	1	Sgeranii	PGPT0001000_385	1
BCCO_861	PGPT0001000_1141	1	Slacri	PGPT0001180_160	1	Sreticuliscabiei	PGPT0001140_6159	1	Sturgidiscabies	PGPT0001135_7253	1	Sgeranii	PGPT0001005_266	1
BCCO_861	PGPT0001000_379	1	Slacri	PGPT0001180_166	1	Sreticuliscabiei	PGPT0001145_1753	1	Sturgidiscabies	PGPT0001135_7533	1	Sgeranii	PGPT0001005_330	1
BCCO_861	PGPT0001000_385	1	Slacri	PGPT0001180_316	1	Sreticuliscabiei	PGPT0001145_2325	1	Sturgidiscabies	PGPT0001140_1695	1	Sgeranii	PGPT0001005_717	1
BCCO_861	PGPT0001005_729	2	Slacri	PGPT0001180_452	1	Sreticuliscabiei	PGPT0001145_3385	1	Sturgidiscabies	PGPT0001140_2172	1	Sgeranii	PGPT0001005_930	1
BCCO_861	PGPT0001005_730	1	Slacri	PGPT0001280_2087	1	Sreticuliscabiei	PGPT0001145_7316	1	Sturgidiscabies	PGPT0001140_3	2	Sgeranii	PGPT0001010_1	1
BCCO_861	PGPT0001010_793	1	Slacri	PGPT0001280_3556	1	Sreticuliscabiei	PGPT0001160_1284	1	Sturgidiscabies	PGPT0001140_4898	1	Sgeranii	PGPT0001010_761	1
BCCO_861	PGPT0001010_800	1	Slacri	PGPT0001280_3914	1	Sreticuliscabiei	PGPT0001160_1352	1	Sturgidiscabies	PGPT0001140_6159	1	Sgeranii	PGPT0001010_841	1
BCCO_861	PGPT0001010_841	2	Slacri	PGPT0001320_1540	1	Sreticuliscabiei	PGPT0001160_842	1	Sturgidiscabies	PGPT0001145_1753	1	Sgeranii	PGPT0001030_2030	1
BCCO_861	PGPT0001030_1740	1	Slacri	PGPT0001340_119	1	Sreticuliscabiei	PGPT0001165_1946	1	Sturgidiscabies	PGPT0001145_2325	1	Sgeranii	PGPT0001035_1432	1
BCCO_861	PGPT0001030_1988	1	Slacri	PGPT0001340_638	1	Sreticuliscabiei	PGPT0001170_1326	1	Sturgidiscabies	PGPT0001145_3385	1	Sgeranii	PGPT0001040_2548	1
BCCO_861	PGPT0001035_1298	1	Slacri	PGPT0001350_1705	1	Sreticuliscabiei	PGPT0001175_251	1	Sturgidiscabies	PGPT0001145_7316	1	Sgeranii	PGPT0001065_124	1
BCCO_861	PGPT0001040_2548	1	Slacri	PGPT0001350_2579	1	Sreticuliscabiei	PGPT0001180_1	1	Sturgidiscabies	PGPT0001160_1284	1	Sgeranii	PGPT0001065_15	1
BCCO_861	PGPT0001065_124	1	Slacri	PGPT0001350_6	1	Sreticuliscabiei	PGPT0001180_160	1	Sturgidiscabies	PGPT0001160_1352	2	Sgeranii	PGPT0001065_603	1
BCCO_861	PGPT0001065_15	1	Slacri	PGPT0001360_1361	1	Sreticuliscabiei	PGPT0001280_2087	1	Sturgidiscabies	PGPT0001160_407	1	Sgeranii	PGPT0001065_611	1
BCCO_861	PGPT0001065_339	1	Slacri	PGPT0001370_1149	1	Sreticuliscabiei	PGPT0001280_3556	1	Sturgidiscabies	PGPT0001160_842	1	Sgeranii	PGPT0001115_1494	1
BCCO_861	PGPT0001065_52	1	Slacri	PGPT0001371_2	2	Sreticuliscabiei	PGPT0001280_3914	1	Sturgidiscabies	PGPT0001165_1946	1	Sgeranii	PGPT0001115_1500	1
BCCO_861	PGPT0001065_691	1	Slacri	PGPT0001371_875	1	Sreticuliscabiei	PGPT0001285_34	1	Sturgidiscabies	PGPT0001170_1326	1	Sgeranii	PGPT0001115_1617	1
BCCO_861	PGPT0001115_1050	1	Slacri	PGPT0001372_1710	1	Sreticuliscabiei	PGPT0001320_1376	1	Sturgidiscabies	PGPT0001175_251	1	Sgeranii	PGPT0001115_367	1
BCCO_861	PGPT0001115_1442	1	Slacri	PGPT0001373_1	1	Sreticuliscabiei	PGPT0001320_1524	1	Sturgidiscabies	PGPT0001180_1	1	Sgeranii	PGPT0001135_1009	1
BCCO_861	PGPT0001135_1111	1	Slacri	PGPT0001380_7079	1	Sreticuliscabiei	PGPT0001330_15	1	Sturgidiscabies	PGPT0001180_160	1	Sgeranii	PGPT0001135_268	1
BCCO_861	PGPT0001135_42	1	Slacri	PGPT0001380_7560	1	Sreticuliscabiei	PGPT0001340_114	1	Sturgidiscabies	PGPT0001280_2087	1	Sgeranii	PGPT0001135_42	1
BCCO_861	PGPT0001135_7307	1	Slacri	PGPT0001385_1057	1	Sreticuliscabiei	PGPT0001340_2663	1	Sturgidiscabies	PGPT0001280_3556	1	Sgeranii	PGPT0001135_7253	1
BCCO_861	PGPT0001135_7506	1	Slacri	PGPT0001385_666	1	Sreticuliscabiei	PGPT0001340_697	1	Sturgidiscabies	PGPT0001280_3914	1	Sgeranii	PGPT0001135_7506	1
BCCO_861	PGPT0001135_7695	1	Slacri	PGPT0001390_1124	1	Sreticuliscabiei	PGPT0001350_1221	1	Sturgidiscabies	PGPT0001285_34	1	Sgeranii	PGPT0001135_7695	1
BCCO_861	PGPT0001135_987	1	Slacri	PGPT0001390_4636	1	Sreticuliscabiei	PGPT0001350_1705	1	Sturgidiscabies	PGPT0001320_1376	1	Sgeranii	PGPT0001135_7838	1
BCCO_861	PGPT0001140_1695	1	Slacri	PGPT0001390_4717	1	Sreticuliscabiei	PGPT0001350_2579	1	Sturgidiscabies	PGPT0001320_1524	1	Sgeranii	PGPT0001135_825	1
BCCO_861	PGPT0001140_2172	1	Slacri	PGPT0001390_4752	1	Sreticuliscabiei	PGPT0001350_2777	1	Sturgidiscabies	PGPT0001330_15	1	Sgeranii	PGPT0001135_8374	1
BCCO_861	PGPT0001140_3	2	Slacri	PGPT0001390_5396	1	Sreticuliscabiei	PGPT0001350_6	1	Sturgidiscabies	PGPT0001340_114	1	Sgeranii	PGPT0001140_1695	1
BCCO_861	PGPT0001140_5105	1	Slacri	PGPT0001390_5896	1	Sreticuliscabiei	PGPT0001360_1361	1	Sturgidiscabies	PGPT0001340_2663	1	Sgeranii	PGPT0001140_2172	1
BCCO_861	PGPT0001140_7942	1	Slacri	PGPT0001390_6269	1	Sreticuliscabiei	PGPT0001370_1149	1	Sturgidiscabies	PGPT0001340_697	1	Sgeranii	PGPT0001140_2533	1
BCCO_861	PGPT0001145_1625	1	Slacri	PGPT0001390_6557	1	Sreticuliscabiei	PGPT0001371_239	1	Sturgidiscabies	PGPT0001350_1221	1	Sgeranii	PGPT0001140_256	1
BCCO_861	PGPT0001145_3385	2	Slacri	PGPT0001400_2529	1	Sreticuliscabiei	PGPT0001371_581	1	Sturgidiscabies	PGPT0001350_1705	1	Sgeranii	PGPT0001140_3	3
BCCO_861	PGPT0001145_5862	1	Slacri	PGPT0001400_2535	1	Sreticuliscabiei	PGPT0001371_617	1	Sturgidiscabies	PGPT0001350_2579	1	Sgeranii	PGPT0001140_4300	1
BCCO_861	PGPT0001145_6668	1	Slacri	PGPT0001400_2863	1	Sreticuliscabiei	PGPT0001372_1710	1	Sturgidiscabies	PGPT0001350_2777	1	Sgeranii	PGPT0001140_4898	1
BCCO_861	PGPT0001145_7316	1	Slacri	PGPT0001400_3347	1	Sreticuliscabiei	PGPT0001373_1	1	Sturgidiscabies	PGPT0001350_6	1	Sgeranii	PGPT0001140_5434	1
BCCO_861	PGPT0001150_1	1	Slacri	PGPT0001420_1905	1	Sreticuliscabiei	PGPT0001380_1105	1	Sturgidiscabies	PGPT0001360_1361	1	Sgeranii	PGPT0001140_662	1
BCCO_861	PGPT0001160_1050	1	Slacri	PGPT0001435_378	1	Sreticuliscabiei	PGPT0001380_7560	1	Sturgidiscabies	PGPT0001370_1149	1	Sgeranii	PGPT0001140_7942	1
BCCO_861	PGPT0001160_1352	1	Slacri	PGPT0001441_4245	1	Sreticuliscabiei	PGPT0001385_1018	1	Sturgidiscabies	PGPT0001371_239	1	Sgeranii	PGPT0001145_1736	1
BCCO_861	PGPT0001160_842	1	Slacri	PGPT0001442_1044	1	Sreticuliscabiei	PGPT0001385_666	1	Sturgidiscabies	PGPT0001371_617	1	Sgeranii	PGPT0001145_2017	1
BCCO_861	PGPT0001160_896	1	Slacri	PGPT0001442_3610	1	Sreticuliscabiei	PGPT0001385_982	1	Sturgidiscabies	PGPT0001372_1710	1	Sgeranii	PGPT0001145_2549	1
BCCO_861	PGPT0001165_1941	1	Slacri	PGPT0001443_3327	1	Sreticuliscabiei	PGPT0001390_1124	1	Sturgidiscabies	PGPT0001373_1	1	Sgeranii	PGPT0001145_3010	1
BCCO_861	PGPT0001170_1390	1	Slacri	PGPT0001443_3621	1	Sreticuliscabiei	PGPT0001390_1203	1	Sturgidiscabies	PGPT0001380_1105	1	Sgeranii	PGPT0001145_3385	2
BCCO_861	PGPT0001175_251	1	Slacri	PGPT0001445_2041	1	Sreticuliscabiei	PGPT0001390_2929	1	Sturgidiscabies	PGPT0001380_7560	1	Sgeranii	PGPT0001145_3538	1
BCCO_861	PGPT0001180_1	1	Slacri	PGPT0001450_233	1	Sreticuliscabiei	PGPT0001390_2941	1	Sturgidiscabies	PGPT0001385_1057	1	Sgeranii	PGPT0001145_5425	1
BCCO_861	PGPT0001180_160	1	Slacri	PGPT0001450_84	1	Sreticuliscabiei	PGPT0001390_6557	1	Sturgidiscabies	PGPT0001385_666	1	Sgeranii	PGPT0001145_616	1
BCCO_861	PGPT0001280_2087	1	Slacri	PGPT0001455_2929	1	Sreticuliscabiei	PGPT0001400_2465	1	Sturgidiscabies	PGPT0001390_1124	1	Sgeranii	PGPT0001145_7196	1
BCCO_861	PGPT0001280_4305	1	Slacri	PGPT0001455_4454	1	Sreticuliscabiei	PGPT0001400_2796	1	Sturgidiscabies	PGPT0001390_1203	1	Sgeranii	PGPT0001145_7316	2
BCCO_861	PGPT0001280_5411	1	Slacri	PGPT0001455_4982	1	Sreticuliscabiei	PGPT0001400_2863	1	Sturgidiscabies	PGPT0001390_2929	1	Sgeranii	PGPT0001160_1259	1
BCCO_861	PGPT0001285_1440	1	Slacri	PGPT0001455_6438	1	Sreticuliscabiei	PGPT0001400_2878	1	Sturgidiscabies	PGPT0001390_4636	1	Sgeranii	PGPT0001160_1284	1
BCCO_861	PGPT0001320_1323	1	Slacri	PGPT0001465_1892	1	Sreticuliscabiei	PGPT0001400_3347	1	Sturgidiscabies	PGPT0001390_6147	1	Sgeranii	PGPT0001160_731	1
BCCO_861	PGPT0001330_15	1	Slacri	PGPT0001490_20	1	Sreticuliscabiei	PGPT0001420_1909	1	Sturgidiscabies	PGPT0001390_6557	1	Sgeranii	PGPT0001160_788	1
BCCO_861	PGPT0001340_697	1	Slacri	PGPT0001500_131	1	Sreticuliscabiei	PGPT0001435_347	1	Sturgidiscabies	PGPT0001400_2465	1	Sgeranii	PGPT0001160_842	1
BCCO_861	PGPT0001350_1705	1	Slacri	PGPT0001500_243	2	Sreticuliscabiei	PGPT0001441_4245	1	Sturgidiscabies	PGPT0001400_2796	2	Sgeranii	PGPT0001160_896	1
BCCO_861	PGPT0001350_2274	1	Slacri	PGPT0001530_3031	1	Sreticuliscabiei	PGPT0001442_1286	1	Sturgidiscabies	PGPT0001400_2863	1	Sgeranii	PGPT0001165_1878	1
BCCO_861	PGPT0001350_6	1	Slacri	PGPT0001540_1557	1	Sreticuliscabiei	PGPT0001443_3315	1	Sturgidiscabies	PGPT0001400_2878	1	Sgeranii	PGPT0001170_1326	1
BCCO_861	PGPT0001370_1149	1	Slacri	PGPT0001565_1260	1	Sreticuliscabiei	PGPT0001445_1842	1	Sturgidiscabies	PGPT0001400_3347	1	Sgeranii	PGPT0001280_2087	1
BCCO_861	PGPT0001371_2	1	Slacri	PGPT0001565_749	1	Sreticuliscabiei	PGPT0001450_14	1	Sturgidiscabies	PGPT0001420_1909	1	Sgeranii	PGPT0001280_3556	1
BCCO_861	PGPT0001371_239	1	Slacri	PGPT0001580_3805	1	Sreticuliscabiei	PGPT0001450_367	1	Sturgidiscabies	PGPT0001435_347	1	Sgeranii	PGPT0001280_3914	1
BCCO_861	PGPT0001372_1848	1	Slacri	PGPT0001580_5823	1	Sreticuliscabiei	PGPT0001455_2929	1	Sturgidiscabies	PGPT0001441_4245	1	Sgeranii	PGPT0001320_1376	1
BCCO_861	PGPT0001373_1	1	Slacri	PGPT0001580_86	1	Sreticuliscabiei	PGPT0001455_6466	1	Sturgidiscabies	PGPT0001442_1286	1	Sgeranii	PGPT0001320_710	1
BCCO_861	PGPT0001380_1105	2	Slacri	PGPT0001590_31	1	Sreticuliscabiei	PGPT0001455_6690	1	Sturgidiscabies	PGPT0001443_3315	1	Sgeranii	PGPT0001320_869	1
BCCO_861	PGPT0001380_2387	1	Slacri	PGPT0001595_3111	1	Sreticuliscabiei	PGPT0001465_1892	1	Sturgidiscabies	PGPT0001445_1842	1	Sgeranii	PGPT0001340_697	1
BCCO_861	PGPT0001380_3554	1	Slacri	PGPT0001595_966	1	Sreticuliscabiei	PGPT0001500_131	1	Sturgidiscabies	PGPT0001450_14	1	Sgeranii	PGPT0001350_1705	1
BCCO_861	PGPT0001380_7560	1	Slacri	PGPT0001600_1056	1	Sreticuliscabiei	PGPT0001530_3031	1	Sturgidiscabies	PGPT0001450_367	1	Sgeranii	PGPT0001350_6	2
BCCO_861	PGPT0001385_1031	1	Slacri	PGPT0001600_1635	1	Sreticuliscabiei	PGPT0001540_1552	1	Sturgidiscabies	PGPT0001455_2929	1	Sgeranii	PGPT0001360_1361	1
BCCO_861	PGPT0001385_1057	1	Slacri	PGPT0001600_2450	1	Sreticuliscabiei	PGPT0001540_2010	1	Sturgidiscabies	PGPT0001455_6466	1	Sgeranii	PGPT0001370_1149	1
BCCO_861	PGPT0001385_495	1	Slacri	PGPT0001605_3928	1	Sreticuliscabiei	PGPT0001565_1913	1	Sturgidiscabies	PGPT0001455_6690	1	Sgeranii	PGPT0001372_1811	1
BCCO_861	PGPT0001385_666	1	Slacri	PGPT0001605_511	1	Sreticuliscabiei	PGPT0001565_4625	1	Sturgidiscabies	PGPT0001465_1892	1	Sgeranii	PGPT0001380_1105	1
BCCO_861	PGPT0001390_1209	1	Slacri	PGPT0001605_624	1	Sreticuliscabiei	PGPT0001565_4941	1	Sturgidiscabies	PGPT0001500_131	1	Sgeranii	PGPT0001385_1353	1
BCCO_861	PGPT0001390_1375	1	Slacri	PGPT0001610_1460	1	Sreticuliscabiei	PGPT0001565_4979	1	Sturgidiscabies	PGPT0001530_3031	1	Sgeranii	PGPT0001385_666	1
BCCO_861	PGPT0001390_4752	2	Slacri	PGPT0001615_276	1	Sreticuliscabiei	PGPT0001565_5078	1	Sturgidiscabies	PGPT0001540_1552	1	Sgeranii	PGPT0001385_972	1
BCCO_861	PGPT0001390_5308	1	Slacri	PGPT0001625_429	1	Sreticuliscabiei	PGPT0001565_749	1	Sturgidiscabies	PGPT0001540_2010	1	Sgeranii	PGPT0001390_1209	1
BCCO_861	PGPT0001390_5896	1	Slacri	PGPT0001630_1	1	Sreticuliscabiei	PGPT0001580_5823	1	Sturgidiscabies	PGPT0001555_303	1	Sgeranii	PGPT0001390_4058	1
BCCO_861	PGPT0001390_6529	1	Slacri	PGPT0001630_156	1	Sreticuliscabiei	PGPT0001580_86	1	Sturgidiscabies	PGPT0001565_1913	1	Sgeranii	PGPT0001390_4344	1
BCCO_861	PGPT0001390_6557	1	Slacri	PGPT0001630_158	1	Sreticuliscabiei	PGPT0001590_31	1	Sturgidiscabies	PGPT0001565_4625	1	Sgeranii	PGPT0001390_6147	1
BCCO_861	PGPT0001400_2354	1	Slacri	PGPT0001630_210	1	Sreticuliscabiei	PGPT0001595_3111	1	Sturgidiscabies	PGPT0001565_4941	1	Sgeranii	PGPT0001390_6557	1
BCCO_861	PGPT0001400_2535	1	Slacri	PGPT0001630_29	1	Sreticuliscabiei	PGPT0001595_587	1	Sturgidiscabies	PGPT0001565_4979	1	Sgeranii	PGPT0001400_2582	1
BCCO_861	PGPT0001400_2863	1	Slacri	PGPT0001635_198	1	Sreticuliscabiei	PGPT0001600_1149	1	Sturgidiscabies	PGPT0001565_5078	1	Sgeranii	PGPT0001400_2863	1
BCCO_861	PGPT0001400_2878	1	Slacri	PGPT0001650_3839	1	Sreticuliscabiei	PGPT0001600_1381	1	Sturgidiscabies	PGPT0001565_749	1	Sgeranii	PGPT0001400_2878	1
BCCO_861	PGPT0001420_1896	1	Slacri	PGPT0001695_234	1	Sreticuliscabiei	PGPT0001600_2450	1	Sturgidiscabies	PGPT0001580_5823	1	Sgeranii	PGPT0001400_3034	1
BCCO_861	PGPT0001420_1916	1	Slacri	PGPT0001705_2107	1	Sreticuliscabiei	PGPT0001605_3928	1	Sturgidiscabies	PGPT0001580_86	1	Sgeranii	PGPT0001400_3347	1
BCCO_861	PGPT0001420_1922	1	Slacri	PGPT0001711_1175	1	Sreticuliscabiei	PGPT0001605_629	1	Sturgidiscabies	PGPT0001590_31	1	Sgeranii	PGPT0001420_1909	1
BCCO_861	PGPT0001435_378	1	Slacri	PGPT0001712_1068	1	Sreticuliscabiei	PGPT0001605_775	1	Sturgidiscabies	PGPT0001595_3111	1	Sgeranii	PGPT0001435_347	1
BCCO_861	PGPT0001441_4379	1	Slacri	PGPT0001712_428	1	Sreticuliscabiei	PGPT0001610_1460	1	Sturgidiscabies	PGPT0001595_587	1	Sgeranii	PGPT0001441_4379	1
BCCO_861	PGPT0001442_1016	1	Slacri	PGPT0001720_2497	1	Sreticuliscabiei	PGPT0001615_276	1	Sturgidiscabies	PGPT0001600_1149	1	Sgeranii	PGPT0001442_1028	1
BCCO_861	PGPT0001443_3315	1	Slacri	PGPT0001722_45	1	Sreticuliscabiei	PGPT0001625_429	1	Sturgidiscabies	PGPT0001600_1381	1	Sgeranii	PGPT0001443_3343	1
BCCO_861	PGPT0001445_1962	1	Slacri	PGPT0001730_196	1	Sreticuliscabiei	PGPT0001630_1	2	Sturgidiscabies	PGPT0001600_2450	1	Sgeranii	PGPT0001445_2041	1
BCCO_861	PGPT0001445_2041	1	Slacri	PGPT0001730_2403	1	Sreticuliscabiei	PGPT0001630_2	1	Sturgidiscabies	PGPT0001605_3928	1	Sgeranii	PGPT0001445_2823	1
BCCO_861	PGPT0001450_233	1	Slacri	PGPT0001730_3073	1	Sreticuliscabiei	PGPT0001630_228	1	Sturgidiscabies	PGPT0001605_629	1	Sgeranii	PGPT0001450_107	1
BCCO_861	PGPT0001450_84	1	Slacri	PGPT0001730_5825	1	Sreticuliscabiei	PGPT0001635_198	1	Sturgidiscabies	PGPT0001605_775	1	Sgeranii	PGPT0001450_14	1
BCCO_861	PGPT0001455_2929	1	Slacri	PGPT0001745_186	1	Sreticuliscabiei	PGPT0001650_3839	1	Sturgidiscabies	PGPT0001610_1460	1	Sgeranii	PGPT0001450_233	1
BCCO_861	PGPT0001455_3198	1	Slacri	PGPT0001745_254	1	Sreticuliscabiei	PGPT0001695_2554	1	Sturgidiscabies	PGPT0001615_276	1	Sgeranii	PGPT0001450_59	1
BCCO_861	PGPT0001455_4962	1	Slacri	PGPT0001745_39	1	Sreticuliscabiei	PGPT0001705_2107	1	Sturgidiscabies	PGPT0001625_429	1	Sgeranii	PGPT0001455_2929	1
BCCO_861	PGPT0001455_4974	1	Slacri	PGPT0001745_584	1	Sreticuliscabiei	PGPT0001710_1701	1	Sturgidiscabies	PGPT0001630_1	2	Sgeranii	PGPT0001455_4454	1
BCCO_861	PGPT0001455_5021	1	Slacri	PGPT0001770_1256	1	Sreticuliscabiei	PGPT0001711_1175	1	Sturgidiscabies	PGPT0001630_2	1	Sgeranii	PGPT0001455_4982	1
BCCO_861	PGPT0001455_6466	1	Slacri	PGPT0001770_4757	1	Sreticuliscabiei	PGPT0001712_1068	1	Sturgidiscabies	PGPT0001630_228	1	Sgeranii	PGPT0001455_6438	1
BCCO_861	PGPT0001465_1910	1	Slacri	PGPT0001770_5884	1	Sreticuliscabiei	PGPT0001712_428	1	Sturgidiscabies	PGPT0001635_198	1	Sgeranii	PGPT0001465_2034	1
BCCO_861	PGPT0001465_2026	1	Slacri	PGPT0001770_7308	1	Sreticuliscabiei	PGPT0001720_2479	1	Sturgidiscabies	PGPT0001650_3839	1	Sgeranii	PGPT0001490_123	1
BCCO_861	PGPT0001500_131	1	Slacri	PGPT0001770_740	1	Sreticuliscabiei	PGPT0001722_45	1	Sturgidiscabies	PGPT0001695_234	1	Sgeranii	PGPT0001490_20	1
BCCO_861	PGPT0001500_243	1	Slacri	PGPT0001770_7604	1	Sreticuliscabiei	PGPT0001730_196	1	Sturgidiscabies	PGPT0001705_2107	1	Sgeranii	PGPT0001500_175	1
BCCO_861	PGPT0001520_804	1	Slacri	PGPT0001770_7813	1	Sreticuliscabiei	PGPT0001730_202	1	Sturgidiscabies	PGPT0001711_1175	2	Sgeranii	PGPT0001520_795	1
BCCO_861	PGPT0001530_3031	1	Slacri	PGPT0001770_8093	1	Sreticuliscabiei	PGPT0001730_2082	1	Sturgidiscabies	PGPT0001712_1068	1	Sgeranii	PGPT0001525_607	1
BCCO_861	PGPT0001540_1552	1	Slacri	PGPT0001810_4	1	Sreticuliscabiei	PGPT0001730_2403	1	Sturgidiscabies	PGPT0001712_428	1	Sgeranii	PGPT0001530_3031	1
BCCO_861	PGPT0001540_1759	1	Slacri	PGPT0001820_111	1	Sreticuliscabiei	PGPT0001730_3073	1	Sturgidiscabies	PGPT0001720_2479	1	Sgeranii	PGPT0001540_1552	1
BCCO_861	PGPT0001540_2010	1	Slacri	PGPT0001830_3	1	Sreticuliscabiei	PGPT0001730_65	1	Sturgidiscabies	PGPT0001722_45	1	Sgeranii	PGPT0001555_303	1
BCCO_861	PGPT0001555_158	1	Slacri	PGPT0001835_816	1	Sreticuliscabiei	PGPT0001730_6806	1	Sturgidiscabies	PGPT0001730_196	1	Sgeranii	PGPT0001565_1913	1
BCCO_861	PGPT0001565_1913	1	Slacri	PGPT0001835_986	1	Sreticuliscabiei	PGPT0001730_773	1	Sturgidiscabies	PGPT0001730_202	1	Sgeranii	PGPT0001565_4625	1
BCCO_861	PGPT0001565_1930	1	Slacri	PGPT0001845_215	1	Sreticuliscabiei	PGPT0001745_105	1	Sturgidiscabies	PGPT0001730_2082	1	Sgeranii	PGPT0001565_4941	1
BCCO_861	PGPT0001565_2838	1	Slacri	PGPT0001850_2323	1	Sreticuliscabiei	PGPT0001745_186	1	Sturgidiscabies	PGPT0001730_2403	1	Sgeranii	PGPT0001565_4979	1
BCCO_861	PGPT0001565_4831	1	Slacri	PGPT0001850_3451	1	Sreticuliscabiei	PGPT0001745_254	1	Sturgidiscabies	PGPT0001730_3073	1	Sgeranii	PGPT0001565_5078	1
BCCO_861	PGPT0001565_4979	1	Slacri	PGPT0001850_6610	1	Sreticuliscabiei	PGPT0001745_373	1	Sturgidiscabies	PGPT0001730_4759	1	Sgeranii	PGPT0001565_769	1
BCCO_861	PGPT0001565_5110	1	Slacri	PGPT0001855_128	1	Sreticuliscabiei	PGPT0001745_584	1	Sturgidiscabies	PGPT0001730_65	1	Sgeranii	PGPT0001575_1	1
BCCO_861	PGPT0001565_730	1	Slacri	PGPT0001855_158	1	Sreticuliscabiei	PGPT0001765_703	1	Sturgidiscabies	PGPT0001730_6806	1	Sgeranii	PGPT0001580_3878	1
BCCO_861	PGPT0001565_859	1	Slacri	PGPT0001855_3322	1	Sreticuliscabiei	PGPT0001770_1256	1	Sturgidiscabies	PGPT0001730_773	1	Sgeranii	PGPT0001580_5816	1
BCCO_861	PGPT0001575_1400	1	Slacri	PGPT0001855_4006	1	Sreticuliscabiei	PGPT0001770_17	1	Sturgidiscabies	PGPT0001745_105	1	Sgeranii	PGPT0001580_86	1
BCCO_861	PGPT0001575_1853	1	Slacri	PGPT0001855_86	1	Sreticuliscabiei	PGPT0001770_4757	1	Sturgidiscabies	PGPT0001745_186	1	Sgeranii	PGPT0001590_31	1
BCCO_861	PGPT0001580_5813	1	Slacri	PGPT0001860_1	1	Sreticuliscabiei	PGPT0001770_4771	1	Sturgidiscabies	PGPT0001745_254	1	Sgeranii	PGPT0001595_3111	1
BCCO_861	PGPT0001580_86	1	Slacri	PGPT0001860_3540	1	Sreticuliscabiei	PGPT0001770_6115	1	Sturgidiscabies	PGPT0001745_373	1	Sgeranii	PGPT0001595_966	1
BCCO_861	PGPT0001590_31	1	Slacri	PGPT0001860_4622	1	Sreticuliscabiei	PGPT0001770_6723	1	Sturgidiscabies	PGPT0001745_584	1	Sgeranii	PGPT0001600_1130	1
BCCO_861	PGPT0001595_3120	1	Slacri	PGPT0001860_5316	1	Sreticuliscabiei	PGPT0001770_7092	1	Sturgidiscabies	PGPT0001765_703	1	Sgeranii	PGPT0001600_1786	1
BCCO_861	PGPT0001595_590	1	Slacri	PGPT0001860_6018	1	Sreticuliscabiei	PGPT0001770_7599	1	Sturgidiscabies	PGPT0001770_1256	2	Sgeranii	PGPT0001600_2440	1
BCCO_861	PGPT0001600_1056	1	Slacri	PGPT0001860_7	1	Sreticuliscabiei	PGPT0001770_7813	1	Sturgidiscabies	PGPT0001770_17	1	Sgeranii	PGPT0001605_3928	1
BCCO_861	PGPT0001600_1381	1	Slacri	PGPT0001860_7013	1	Sreticuliscabiei	PGPT0001820_111	1	Sturgidiscabies	PGPT0001770_4757	1	Sgeranii	PGPT0001605_4223	1
BCCO_861	PGPT0001600_2499	1	Slacri	PGPT0001860_7841	1	Sreticuliscabiei	PGPT0001835_2217	1	Sturgidiscabies	PGPT0001770_4771	1	Sgeranii	PGPT0001605_624	1
BCCO_861	PGPT0001605_3895	1	Slacri	PGPT0001870_1281	1	Sreticuliscabiei	PGPT0001835_816	1	Sturgidiscabies	PGPT0001770_6115	1	Sgeranii	PGPT0001605_854	1
BCCO_861	PGPT0001605_678	1	Slacri	PGPT0001870_592	1	Sreticuliscabiei	PGPT0001835_986	1	Sturgidiscabies	PGPT0001770_6723	1	Sgeranii	PGPT0001615_276	3
BCCO_861	PGPT0001605_724	1	Slacri	PGPT0001875_728	1	Sreticuliscabiei	PGPT0001840_254	1	Sturgidiscabies	PGPT0001770_7092	1	Sgeranii	PGPT0001625_429	1
BCCO_861	PGPT0001605_811	1	Slacri	PGPT0001880_162	1	Sreticuliscabiei	PGPT0001840_513	1	Sturgidiscabies	PGPT0001770_7599	1	Sgeranii	PGPT0001630_1	1
BCCO_861	PGPT0001610_1447	1	Slacri	PGPT0001880_1932	1	Sreticuliscabiei	PGPT0001845_1941	1	Sturgidiscabies	PGPT0001770_7813	1	Sgeranii	PGPT0001630_24	1
BCCO_861	PGPT0001615_276	3	Slacri	PGPT0001890_1360	1	Sreticuliscabiei	PGPT0001845_215	1	Sturgidiscabies	PGPT0001770_991	1	Sgeranii	PGPT0001695_234	1
BCCO_861	PGPT0001615_408	1	Slacri	PGPT0001910_268	1	Sreticuliscabiei	PGPT0001845_4	1	Sturgidiscabies	PGPT0001820_111	1	Sgeranii	PGPT0001705_2260	1
BCCO_861	PGPT0001615_70	1	Slacri	PGPT0001960_3840	1	Sreticuliscabiei	PGPT0001850_2385	1	Sturgidiscabies	PGPT0001835_2217	1	Sgeranii	PGPT0001711_1175	1
BCCO_861	PGPT0001625_429	1	Slacri	PGPT0001960_5902	1	Sreticuliscabiei	PGPT0001850_4549	1	Sturgidiscabies	PGPT0001835_816	1	Sgeranii	PGPT0001712_1068	1
BCCO_861	PGPT0001630_1	2	Slacri	PGPT0001970_594	1	Sreticuliscabiei	PGPT0001850_5756	1	Sturgidiscabies	PGPT0001835_986	1	Sgeranii	PGPT0001712_428	1
BCCO_861	PGPT0001630_202	1	Slacri	PGPT0001975_2486	1	Sreticuliscabiei	PGPT0001855_128	1	Sturgidiscabies	PGPT0001840_254	1	Sgeranii	PGPT0001720_2479	1
BCCO_861	PGPT0001630_210	1	Slacri	PGPT0001980_714	1	Sreticuliscabiei	PGPT0001855_158	1	Sturgidiscabies	PGPT0001840_513	2	Sgeranii	PGPT0001722_45	1
BCCO_861	PGPT0001630_218	1	Slacri	PGPT0001980_919	1	Sreticuliscabiei	PGPT0001855_3322	1	Sturgidiscabies	PGPT0001845_1941	1	Sgeranii	PGPT0001730_1060	1
BCCO_861	PGPT0001630_24	1	Slacri	PGPT0002000_176	1	Sreticuliscabiei	PGPT0001855_4044	1	Sturgidiscabies	PGPT0001845_215	1	Sgeranii	PGPT0001730_196	1
BCCO_861	PGPT0001635_116	1	Slacri	PGPT0002000_294	1	Sreticuliscabiei	PGPT0001855_86	1	Sturgidiscabies	PGPT0001845_4	1	Sgeranii	PGPT0001730_3073	2
BCCO_861	PGPT0001635_202	1	Slacri	PGPT0002020_5272	1	Sreticuliscabiei	PGPT0001860_1	1	Sturgidiscabies	PGPT0001850_2385	1	Sgeranii	PGPT0001730_4727	1
BCCO_861	PGPT0001650_3046	1	Slacri	PGPT0002020_6070	1	Sreticuliscabiei	PGPT0001860_3040	1	Sturgidiscabies	PGPT0001850_4549	1	Sgeranii	PGPT0001730_6630	1
BCCO_861	PGPT0001650_3834	1	Slacri	PGPT0002025_2800	1	Sreticuliscabiei	PGPT0001860_3540	1	Sturgidiscabies	PGPT0001850_5756	1	Sgeranii	PGPT0001745_184	1
BCCO_861	PGPT0001695_234	1	Slacri	PGPT0002035_2807	1	Sreticuliscabiei	PGPT0001860_3899	1	Sturgidiscabies	PGPT0001855_128	1	Sgeranii	PGPT0001745_25	1
BCCO_861	PGPT0001705_2885	1	Slacri	PGPT0002035_2917	1	Sreticuliscabiei	PGPT0001860_4118	1	Sturgidiscabies	PGPT0001855_158	1	Sgeranii	PGPT0001745_254	2
BCCO_861	PGPT0001705_591	1	Slacri	PGPT0002035_2946	1	Sreticuliscabiei	PGPT0001860_4569	1	Sturgidiscabies	PGPT0001855_3322	1	Sgeranii	PGPT0001745_324	1
BCCO_861	PGPT0001711_1176	1	Slacri	PGPT0002040_1571	1	Sreticuliscabiei	PGPT0001860_4622	1	Sturgidiscabies	PGPT0001855_4044	1	Sgeranii	PGPT0001745_35	1
BCCO_861	PGPT0001711_1182	1	Slacri	PGPT0002040_2078	1	Sreticuliscabiei	PGPT0001860_4783	1	Sturgidiscabies	PGPT0001855_86	1	Sgeranii	PGPT0001745_435	1
BCCO_861	PGPT0001711_1193	1	Slacri	PGPT0002040_283	1	Sreticuliscabiei	PGPT0001860_5268	1	Sturgidiscabies	PGPT0001860_1	1	Sgeranii	PGPT0001745_584	1
BCCO_861	PGPT0001711_47	1	Slacri	PGPT0002045_3251	1	Sreticuliscabiei	PGPT0001860_5985	1	Sturgidiscabies	PGPT0001860_3040	1	Sgeranii	PGPT0001745_645	1
BCCO_861	PGPT0001712_1068	1	Slacri	PGPT0002045_4401	1	Sreticuliscabiei	PGPT0001860_6018	1	Sturgidiscabies	PGPT0001860_3540	1	Sgeranii	PGPT0001745_87	1
BCCO_861	PGPT0001712_428	1	Slacri	PGPT0002045_47	1	Sreticuliscabiei	PGPT0001860_6826	1	Sturgidiscabies	PGPT0001860_3899	1	Sgeranii	PGPT0001765_703	1
BCCO_861	PGPT0001720_2467	1	Slacri	PGPT0002060_2736	1	Sreticuliscabiei	PGPT0001860_7841	1	Sturgidiscabies	PGPT0001860_4118	1	Sgeranii	PGPT0001770_1256	1
BCCO_861	PGPT0001722_86	1	Slacri	PGPT0002060_676	1	Sreticuliscabiei	PGPT0001860_7984	1	Sturgidiscabies	PGPT0001860_4569	1	Sgeranii	PGPT0001770_17	1
BCCO_861	PGPT0001730_267	1	Slacri	PGPT0002080_1030	1	Sreticuliscabiei	PGPT0001860_841	1	Sturgidiscabies	PGPT0001860_4622	1	Sgeranii	PGPT0001770_4375	1
BCCO_861	PGPT0001730_3073	1	Slacri	PGPT0002080_1330	1	Sreticuliscabiei	PGPT0001870_1281	1	Sturgidiscabies	PGPT0001860_4783	1	Sgeranii	PGPT0001770_4397	1
BCCO_861	PGPT0001730_3574	1	Slacri	PGPT0002080_3700	1	Sreticuliscabiei	PGPT0001870_601	1	Sturgidiscabies	PGPT0001860_5268	1	Sgeranii	PGPT0001770_4771	1
BCCO_861	PGPT0001730_4727	1	Slacri	PGPT0002080_4077	1	Sreticuliscabiei	PGPT0001875_728	1	Sturgidiscabies	PGPT0001860_5985	1	Sgeranii	PGPT0001770_559	1
BCCO_861	PGPT0001745_180	1	Slacri	PGPT0002080_8589	1	Sreticuliscabiei	PGPT0001880_162	1	Sturgidiscabies	PGPT0001860_6018	1	Sgeranii	PGPT0001770_6723	1
BCCO_861	PGPT0001745_184	1	Slacri	PGPT0002085_54	1	Sreticuliscabiei	PGPT0001880_1932	1	Sturgidiscabies	PGPT0001860_6826	1	Sgeranii	PGPT0001770_7092	1
BCCO_861	PGPT0001745_25	3	Slacri	PGPT0002125_68	1	Sreticuliscabiei	PGPT0001890_31	1	Sturgidiscabies	PGPT0001860_7841	1	Sgeranii	PGPT0001770_7526	1
BCCO_861	PGPT0001745_254	1	Slacri	PGPT0002130_132	1	Sreticuliscabiei	PGPT0001910_384	1	Sturgidiscabies	PGPT0001860_7984	1	Sgeranii	PGPT0001770_7813	1
BCCO_861	PGPT0001745_391	1	Slacri	PGPT0002130_154	1	Sreticuliscabiei	PGPT0001950_954	1	Sturgidiscabies	PGPT0001860_841	1	Sgeranii	PGPT0001810_4	1
BCCO_861	PGPT0001745_492	1	Slacri	PGPT0002130_26	1	Sreticuliscabiei	PGPT0001960_3840	1	Sturgidiscabies	PGPT0001870_1281	1	Sgeranii	PGPT0001820_111	1
BCCO_861	PGPT0001745_584	1	Slacri	PGPT0002130_653	1	Sreticuliscabiei	PGPT0001960_5902	1	Sturgidiscabies	PGPT0001870_601	1	Sgeranii	PGPT0001830_3	1
BCCO_861	PGPT0001745_727	1	Slacri	PGPT0002130_657	1	Sreticuliscabiei	PGPT0001970_648	1	Sturgidiscabies	PGPT0001875_728	1	Sgeranii	PGPT0001835_2217	1
BCCO_861	PGPT0001760_3009	1	Slacri	PGPT0002190_193	1	Sreticuliscabiei	PGPT0001975_2486	1	Sturgidiscabies	PGPT0001880_162	1	Sgeranii	PGPT0001835_816	1
BCCO_861	PGPT0001765_726	1	Slacri	PGPT0002205_289	1	Sreticuliscabiei	PGPT0001980_689	1	Sturgidiscabies	PGPT0001880_1932	1	Sgeranii	PGPT0001835_986	1
BCCO_861	PGPT0001770_1256	1	Slacri	PGPT0002220_886	1	Sreticuliscabiei	PGPT0001980_714	1	Sturgidiscabies	PGPT0001910_384	1	Sgeranii	PGPT0001850_2404	1
BCCO_861	PGPT0001770_17	1	Slacri	PGPT0002255_10	1	Sreticuliscabiei	PGPT0001990_1958	1	Sturgidiscabies	PGPT0001950_954	1	Sgeranii	PGPT0001850_4549	1
BCCO_861	PGPT0001770_4393	1	Slacri	PGPT0002255_85	1	Sreticuliscabiei	PGPT0002000_176	1	Sturgidiscabies	PGPT0001960_3840	1	Sgeranii	PGPT0001855_128	1
BCCO_861	PGPT0001770_4883	1	Slacri	PGPT0002265_3210	1	Sreticuliscabiei	PGPT0002000_294	1	Sturgidiscabies	PGPT0001960_5737	1	Sgeranii	PGPT0001855_158	1
BCCO_861	PGPT0001770_5127	1	Slacri	PGPT0002265_6732	1	Sreticuliscabiei	PGPT0002020_5272	1	Sturgidiscabies	PGPT0001960_5902	1	Sgeranii	PGPT0001855_3322	1
BCCO_861	PGPT0001770_6723	1	Slacri	PGPT0002265_8121	1	Sreticuliscabiei	PGPT0002020_6088	1	Sturgidiscabies	PGPT0001970_648	1	Sgeranii	PGPT0001855_4044	1
BCCO_861	PGPT0001770_6942	1	Slacri	PGPT0002265_850	1	Sreticuliscabiei	PGPT0002025_2800	1	Sturgidiscabies	PGPT0001975_2486	1	Sgeranii	PGPT0001855_86	1
BCCO_861	PGPT0001770_7088	1	Slacri	PGPT0002285_1251	1	Sreticuliscabiei	PGPT0002035_2764	1	Sturgidiscabies	PGPT0001980_689	1	Sgeranii	PGPT0001860_1	1
BCCO_861	PGPT0001770_7448	1	Slacri	PGPT0002285_1256	1	Sreticuliscabiei	PGPT0002040_1015	1	Sturgidiscabies	PGPT0001980_714	1	Sgeranii	PGPT0001860_1049	1
BCCO_861	PGPT0001770_7599	1	Slacri	PGPT0002285_285	1	Sreticuliscabiei	PGPT0002040_313	1	Sturgidiscabies	PGPT0001980_715	1	Sgeranii	PGPT0001860_3040	1
BCCO_861	PGPT0001770_7813	1	Slacri	PGPT0002285_397	1	Sreticuliscabiei	PGPT0002045_3251	1	Sturgidiscabies	PGPT0001990_1958	1	Sgeranii	PGPT0001860_3615	1
BCCO_861	PGPT0001780_1414	1	Slacri	PGPT0002285_547	1	Sreticuliscabiei	PGPT0002045_4401	1	Sturgidiscabies	PGPT0002000_176	1	Sgeranii	PGPT0001860_3859	1
BCCO_861	PGPT0001800_1488	1	Slacri	PGPT0002285_601	1	Sreticuliscabiei	PGPT0002045_46	1	Sturgidiscabies	PGPT0002000_294	1	Sgeranii	PGPT0001860_3899	1
BCCO_861	PGPT0001820_106	1	Slacri	PGPT0002285_614	1	Sreticuliscabiei	PGPT0002045_47	1	Sturgidiscabies	PGPT0002020_5272	1	Sgeranii	PGPT0001860_4118	1
BCCO_861	PGPT0001835_1339	1	Slacri	PGPT0002290_1875	1	Sreticuliscabiei	PGPT0002050_759	1	Sturgidiscabies	PGPT0002020_6088	1	Sgeranii	PGPT0001860_4569	1
BCCO_861	PGPT0001835_1379	1	Slacri	PGPT0002290_1927	1	Sreticuliscabiei	PGPT0002060_1355	1	Sturgidiscabies	PGPT0002025_2800	1	Sgeranii	PGPT0001860_4622	1
BCCO_861	PGPT0001835_2217	1	Slacri	PGPT0002295_2286	1	Sreticuliscabiei	PGPT0002060_2702	1	Sturgidiscabies	PGPT0002035_2764	1	Sgeranii	PGPT0001860_5326	1
BCCO_861	PGPT0001835_816	1	Slacri	PGPT0002300_402	4	Sreticuliscabiei	PGPT0002060_3486	1	Sturgidiscabies	PGPT0002040_1015	1	Sgeranii	PGPT0001860_6018	1
BCCO_861	PGPT0001840_474	1	Slacri	PGPT0002300_420	1	Sreticuliscabiei	PGPT0002080_1330	1	Sturgidiscabies	PGPT0002040_313	1	Sgeranii	PGPT0001860_6826	1
BCCO_861	PGPT0001840_712	1	Slacri	PGPT0002375_107	1	Sreticuliscabiei	PGPT0002080_2215	1	Sturgidiscabies	PGPT0002045_3251	1	Sgeranii	PGPT0001860_7841	1
BCCO_861	PGPT0001845_210	1	Slacri	PGPT0002375_89	1	Sreticuliscabiei	PGPT0002080_2843	1	Sturgidiscabies	PGPT0002045_4401	1	Sgeranii	PGPT0001860_7984	1
BCCO_861	PGPT0001850_5756	1	Slacri	PGPT0002400_1148	1	Sreticuliscabiei	PGPT0002080_4063	1	Sturgidiscabies	PGPT0002045_46	1	Sgeranii	PGPT0001860_841	1
BCCO_861	PGPT0001855_128	1	Slacri	PGPT0002405_602	1	Sreticuliscabiei	PGPT0002080_8589	1	Sturgidiscabies	PGPT0002045_47	1	Sgeranii	PGPT0001870_1281	1
BCCO_861	PGPT0001855_133	1	Slacri	PGPT0002415_1589	1	Sreticuliscabiei	PGPT0002085_201	1	Sturgidiscabies	PGPT0002050_759	1	Sgeranii	PGPT0001870_592	1
BCCO_861	PGPT0001855_158	1	Slacri	PGPT0002415_404	1	Sreticuliscabiei	PGPT0002085_54	1	Sturgidiscabies	PGPT0002060_1355	1	Sgeranii	PGPT0001880_1917	1
BCCO_861	PGPT0001855_3322	1	Slacri	PGPT0002415_5853	1	Sreticuliscabiei	PGPT0002125_60	1	Sturgidiscabies	PGPT0002060_2702	1	Sgeranii	PGPT0001890_691	1
BCCO_861	PGPT0001855_4006	2	Slacri	PGPT0002415_6249	1	Sreticuliscabiei	PGPT0002130_132	1	Sturgidiscabies	PGPT0002060_3486	1	Sgeranii	PGPT0001905_301	1
BCCO_861	PGPT0001855_74	1	Slacri	PGPT0002415_6665	1	Sreticuliscabiei	PGPT0002130_150	1	Sturgidiscabies	PGPT0002080_1330	1	Sgeranii	PGPT0001910_366	1
BCCO_861	PGPT0001855_86	1	Slacri	PGPT0002415_71	1	Sreticuliscabiei	PGPT0002130_26	1	Sturgidiscabies	PGPT0002080_2215	1	Sgeranii	PGPT0001950_949	1
BCCO_861	PGPT0001860_1049	1	Slacri	PGPT0002425_83	1	Sreticuliscabiei	PGPT0002130_353	1	Sturgidiscabies	PGPT0002080_2843	1	Sgeranii	PGPT0001960_25	1
BCCO_861	PGPT0001860_1091	2	Slacri	PGPT0002475_46	1	Sreticuliscabiei	PGPT0002130_386	1	Sturgidiscabies	PGPT0002080_4063	1	Sgeranii	PGPT0001960_5908	1
BCCO_861	PGPT0001860_1360	1	Slacri	PGPT0002500_11	1	Sreticuliscabiei	PGPT0002130_415	1	Sturgidiscabies	PGPT0002080_8589	1	Sgeranii	PGPT0001975_2486	1
BCCO_861	PGPT0001860_3540	1	Slacri	PGPT0002515_184	1	Sreticuliscabiei	PGPT0002130_440	2	Sturgidiscabies	PGPT0002085_201	1	Sgeranii	PGPT0001980_296	1
BCCO_861	PGPT0001860_3899	1	Slacri	PGPT0002515_209	1	Sreticuliscabiei	PGPT0002130_657	2	Sturgidiscabies	PGPT0002085_54	1	Sgeranii	PGPT0001990_65	1
BCCO_861	PGPT0001860_4175	1	Slacri	PGPT0002515_281	1	Sreticuliscabiei	PGPT0002130_668	2	Sturgidiscabies	PGPT0002125_60	1	Sgeranii	PGPT0001995_264	2
BCCO_861	PGPT0001860_4340	1	Slacri	PGPT0002515_358	2	Sreticuliscabiei	PGPT0002190_193	1	Sturgidiscabies	PGPT0002130_132	1	Sgeranii	PGPT0002000_176	1
BCCO_861	PGPT0001860_4622	1	Slacri	PGPT0002515_45	1	Sreticuliscabiei	PGPT0002220_1603	1	Sturgidiscabies	PGPT0002130_150	1	Sgeranii	PGPT0002000_294	1
BCCO_861	PGPT0001860_5315	1	Slacri	PGPT0002515_600	1	Sreticuliscabiei	PGPT0002220_886	1	Sturgidiscabies	PGPT0002130_26	1	Sgeranii	PGPT0002020_5272	1
BCCO_861	PGPT0001860_5316	1	Slacri	PGPT0002515_631	1	Sreticuliscabiei	PGPT0002255_12	1	Sturgidiscabies	PGPT0002130_417	1	Sgeranii	PGPT0002020_6070	1
BCCO_861	PGPT0001860_5326	1	Slacri	PGPT0002570_3590	1	Sreticuliscabiei	PGPT0002255_16	1	Sturgidiscabies	PGPT0002130_440	2	Sgeranii	PGPT0002025_2800	1
BCCO_861	PGPT0001860_5637	1	Slacri	PGPT0002575_1534	1	Sreticuliscabiei	PGPT0002255_760	1	Sturgidiscabies	PGPT0002130_657	2	Sgeranii	PGPT0002035_119	1
BCCO_861	PGPT0001860_6514	1	Slacri	PGPT0002575_1925	1	Sreticuliscabiei	PGPT0002255_85	1	Sturgidiscabies	PGPT0002130_668	2	Sgeranii	PGPT0002040_1015	1
BCCO_861	PGPT0001860_7650	1	Slacri	PGPT0002575_787	2	Sreticuliscabiei	PGPT0002265_13	1	Sturgidiscabies	PGPT0002190_193	1	Sgeranii	PGPT0002040_326	1
BCCO_861	PGPT0001860_7844	1	Slacri	PGPT0002575_878	1	Sreticuliscabiei	PGPT0002265_3210	1	Sturgidiscabies	PGPT0002205_289	1	Sgeranii	PGPT0002045_18	2
BCCO_861	PGPT0001860_7984	1	Slacri	PGPT0002580_20	1	Sreticuliscabiei	PGPT0002265_65	3	Sturgidiscabies	PGPT0002220_1603	1	Sgeranii	PGPT0002045_3251	1
BCCO_861	PGPT0001860_841	1	Slacri	PGPT0002580_255	1	Sreticuliscabiei	PGPT0002265_6732	1	Sturgidiscabies	PGPT0002220_886	1	Sgeranii	PGPT0002045_3617	1
BCCO_861	PGPT0001865_344	1	Slacri	PGPT0002595_2705	1	Sreticuliscabiei	PGPT0002265_8121	1	Sturgidiscabies	PGPT0002255_10	1	Sgeranii	PGPT0002045_422	1
BCCO_861	PGPT0001870_575	1	Slacri	PGPT0002595_3505	1	Sreticuliscabiei	PGPT0002265_850	1	Sturgidiscabies	PGPT0002255_12	1	Sgeranii	PGPT0002045_4401	1
BCCO_861	PGPT0001870_595	1	Slacri	PGPT0002595_4588	1	Sreticuliscabiei	PGPT0002270_1237	1	Sturgidiscabies	PGPT0002255_85	1	Sgeranii	PGPT0002045_47	1
BCCO_861	PGPT0001870_601	1	Slacri	PGPT0002595_4920	1	Sreticuliscabiei	PGPT0002285_1251	1	Sturgidiscabies	PGPT0002265_13	1	Sgeranii	PGPT0002050_667	1
BCCO_861	PGPT0001875_760	1	Slacri	PGPT0002600_4465	1	Sreticuliscabiei	PGPT0002285_285	1	Sturgidiscabies	PGPT0002265_3210	1	Sgeranii	PGPT0002050_759	1
BCCO_861	PGPT0001880_1834	1	Slacri	PGPT0002605_4	1	Sreticuliscabiei	PGPT0002285_397	1	Sturgidiscabies	PGPT0002265_65	3	Sgeranii	PGPT0002060_3486	1
BCCO_861	PGPT0001880_1936	1	Slacri	PGPT0002610_1387	1	Sreticuliscabiei	PGPT0002285_547	1	Sturgidiscabies	PGPT0002265_6732	1	Sgeranii	PGPT0002060_674	1
BCCO_861	PGPT0001890_1359	1	Slacri	PGPT0002610_1902	1	Sreticuliscabiei	PGPT0002285_614	2	Sturgidiscabies	PGPT0002265_8121	1	Sgeranii	PGPT0002080_1315	1
BCCO_861	PGPT0001890_31	1	Slacri	PGPT0002610_2801	1	Sreticuliscabiei	PGPT0002290_1927	1	Sturgidiscabies	PGPT0002265_850	2	Sgeranii	PGPT0002080_1330	1
BCCO_861	PGPT0001910_384	1	Slacri	PGPT0002610_3505	1	Sreticuliscabiei	PGPT0002295_2173	1	Sturgidiscabies	PGPT0002270_1237	1	Sgeranii	PGPT0002080_2719	1
BCCO_861	PGPT0001960_2030	1	Slacri	PGPT0002615_1007	1	Sreticuliscabiei	PGPT0002300_402	1	Sturgidiscabies	PGPT0002285_1099	1	Sgeranii	PGPT0002080_4071	1
BCCO_861	PGPT0001960_3613	1	Slacri	PGPT0002615_2979	1	Sreticuliscabiei	PGPT0002300_75	1	Sturgidiscabies	PGPT0002285_1251	1	Sgeranii	PGPT0002080_579	1
BCCO_861	PGPT0001960_5908	1	Slacri	PGPT0002615_3556	1	Sreticuliscabiei	PGPT0002375_223	1	Sturgidiscabies	PGPT0002285_285	1	Sgeranii	PGPT0002080_8703	1
BCCO_861	PGPT0001970_594	1	Slacri	PGPT0002615_572	1	Sreticuliscabiei	PGPT0002375_674	1	Sturgidiscabies	PGPT0002285_397	1	Sgeranii	PGPT0002085_1034	1
BCCO_861	PGPT0001975_2315	1	Slacri	PGPT0002620_1884	1	Sreticuliscabiei	PGPT0002400_1148	1	Sturgidiscabies	PGPT0002285_547	1	Sgeranii	PGPT0002085_1392	1
BCCO_861	PGPT0001975_2470	1	Slacri	PGPT0002620_1918	1	Sreticuliscabiei	PGPT0002405_462	1	Sturgidiscabies	PGPT0002285_614	2	Sgeranii	PGPT0002085_2	1
BCCO_861	PGPT0001980_715	1	Slacri	PGPT0002620_1932	1	Sreticuliscabiei	PGPT0002415_1008	1	Sturgidiscabies	PGPT0002290_1927	1	Sgeranii	PGPT0002085_54	1
BCCO_861	PGPT0001980_752	1	Slacri	PGPT0002620_3318	1	Sreticuliscabiei	PGPT0002415_404	1	Sturgidiscabies	PGPT0002295_2173	1	Sgeranii	PGPT0002085_745	1
BCCO_861	PGPT0001980_839	1	Slacri	PGPT0002625_1518	1	Sreticuliscabiei	PGPT0002415_5853	1	Sturgidiscabies	PGPT0002295_2263	1	Sgeranii	PGPT0002085_935	1
BCCO_861	PGPT0001990_65	1	Slacri	PGPT0002625_1775	1	Sreticuliscabiei	PGPT0002415_6104	1	Sturgidiscabies	PGPT0002300_402	1	Sgeranii	PGPT0002115_26	1
BCCO_861	PGPT0002000_176	1	Slacri	PGPT0002625_1906	1	Sreticuliscabiei	PGPT0002415_6665	1	Sturgidiscabies	PGPT0002300_75	1	Sgeranii	PGPT0002125_60	1
BCCO_861	PGPT0002000_294	1	Slacri	PGPT0002625_197	1	Sreticuliscabiei	PGPT0002415_71	1	Sturgidiscabies	PGPT0002375_223	1	Sgeranii	PGPT0002130_154	1
BCCO_861	PGPT0002020_5272	1	Slacri	PGPT0002625_231	1	Sreticuliscabiei	PGPT0002425_83	1	Sturgidiscabies	PGPT0002375_674	1	Sgeranii	PGPT0002130_26	1
BCCO_861	PGPT0002020_5381	1	Slacri	PGPT0002625_75	1	Sreticuliscabiei	PGPT0002475_46	1	Sturgidiscabies	PGPT0002400_1148	1	Sgeranii	PGPT0002130_386	1
BCCO_861	PGPT0002020_6088	1	Slacri	PGPT0002625_970	1	Sreticuliscabiei	PGPT0002515_205	1	Sturgidiscabies	PGPT0002405_462	1	Sgeranii	PGPT0002130_413	1
BCCO_861	PGPT0002025_2727	1	Slacri	PGPT0002630_2	1	Sreticuliscabiei	PGPT0002515_209	1	Sturgidiscabies	PGPT0002415_1589	1	Sgeranii	PGPT0002130_440	1
BCCO_861	PGPT0002025_2800	1	Slacri	PGPT0002630_2097	1	Sreticuliscabiei	PGPT0002515_267	1	Sturgidiscabies	PGPT0002415_404	1	Sgeranii	PGPT0002130_657	2
BCCO_861	PGPT0002035_2739	1	Slacri	PGPT0002655_1774	1	Sreticuliscabiei	PGPT0002515_281	1	Sturgidiscabies	PGPT0002415_5853	1	Sgeranii	PGPT0002130_668	2
BCCO_861	PGPT0002035_2807	1	Slacri	PGPT0002655_2313	1	Sreticuliscabiei	PGPT0002515_349	1	Sturgidiscabies	PGPT0002415_6104	1	Sgeranii	PGPT0002190_186	1
BCCO_861	PGPT0002035_2946	1	Slacri	PGPT0002655_3724	1	Sreticuliscabiei	PGPT0002515_358	1	Sturgidiscabies	PGPT0002415_6665	1	Sgeranii	PGPT0002220_1603	1
BCCO_861	PGPT0002040_1473	1	Slacri	PGPT0002665_539	1	Sreticuliscabiei	PGPT0002515_455	1	Sturgidiscabies	PGPT0002415_71	1	Sgeranii	PGPT0002220_886	1
BCCO_861	PGPT0002040_1571	3	Slacri	PGPT0002665_73	1	Sreticuliscabiei	PGPT0002515_600	1	Sturgidiscabies	PGPT0002425_83	1	Sgeranii	PGPT0002255_10	1
BCCO_861	PGPT0002040_313	1	Slacri	PGPT0002665_971	1	Sreticuliscabiei	PGPT0002515_614	1	Sturgidiscabies	PGPT0002475_46	1	Sgeranii	PGPT0002255_11	1
BCCO_861	PGPT0002045_18	1	Slacri	PGPT0002670_281	1	Sreticuliscabiei	PGPT0002515_643	1	Sturgidiscabies	PGPT0002515_205	1	Sgeranii	PGPT0002255_85	1
BCCO_861	PGPT0002045_3251	1	Slacri	PGPT0002675_104	1	Sreticuliscabiei	PGPT0002570_3590	1	Sturgidiscabies	PGPT0002515_209	1	Sgeranii	PGPT0002265_2777	1
BCCO_861	PGPT0002045_3617	1	Slacri	PGPT0002675_142	1	Sreticuliscabiei	PGPT0002575_1925	1	Sturgidiscabies	PGPT0002515_267	1	Sgeranii	PGPT0002265_65	3
BCCO_861	PGPT0002045_4401	1	Slacri	PGPT0002675_159	1	Sreticuliscabiei	PGPT0002575_787	2	Sturgidiscabies	PGPT0002515_281	1	Sgeranii	PGPT0002265_6732	1
BCCO_861	PGPT0002045_47	1	Slacri	PGPT0002675_248	1	Sreticuliscabiei	PGPT0002575_874	1	Sturgidiscabies	PGPT0002515_349	1	Sgeranii	PGPT0002265_8121	1
BCCO_861	PGPT0002060_1376	1	Slacri	PGPT0002675_329	1	Sreticuliscabiei	PGPT0002580_20	1	Sturgidiscabies	PGPT0002515_358	1	Sgeranii	PGPT0002265_850	2
BCCO_861	PGPT0002060_3486	1	Slacri	PGPT0002675_53	1	Sreticuliscabiei	PGPT0002595_2705	1	Sturgidiscabies	PGPT0002515_455	1	Sgeranii	PGPT0002270_256	1
BCCO_861	PGPT0002080_1330	1	Slacri	PGPT0002675_624	1	Sreticuliscabiei	PGPT0002595_4043	1	Sturgidiscabies	PGPT0002515_600	1	Sgeranii	PGPT0002285_1251	1
BCCO_861	PGPT0002080_2207	1	Slacri	PGPT0002675_81	1	Sreticuliscabiei	PGPT0002595_4890	1	Sturgidiscabies	PGPT0002515_614	1	Sgeranii	PGPT0002285_285	1
BCCO_861	PGPT0002080_2770	1	Slacri	PGPT0002675_867	2	Sreticuliscabiei	PGPT0002595_4920	1	Sturgidiscabies	PGPT0002515_643	1	Sgeranii	PGPT0002285_376	1
BCCO_861	PGPT0002080_2795	1	Slacri	PGPT0002685_119	1	Sreticuliscabiei	PGPT0002600_4465	1	Sturgidiscabies	PGPT0002570_3590	1	Sgeranii	PGPT0002285_439	1
BCCO_861	PGPT0002080_2843	1	Slacri	PGPT0002685_5	1	Sreticuliscabiei	PGPT0002605_4	1	Sturgidiscabies	PGPT0002575_1925	1	Sgeranii	PGPT0002285_547	1
BCCO_861	PGPT0002080_4033	1	Slacri	PGPT0002690_1309	1	Sreticuliscabiei	PGPT0002610_1869	1	Sturgidiscabies	PGPT0002575_787	2	Sgeranii	PGPT0002285_614	2
BCCO_861	PGPT0002080_4623	1	Slacri	PGPT0002690_2069	1	Sreticuliscabiei	PGPT0002615_3532	1	Sturgidiscabies	PGPT0002575_874	1	Sgeranii	PGPT0002285_882	1
BCCO_861	PGPT0002080_579	1	Slacri	PGPT0002690_392	1	Sreticuliscabiei	PGPT0002620_1884	1	Sturgidiscabies	PGPT0002580_20	1	Sgeranii	PGPT0002290_1927	1
BCCO_861	PGPT0002085_1200	1	Slacri	PGPT0002700_1081	1	Sreticuliscabiei	PGPT0002625_1169	1	Sturgidiscabies	PGPT0002595_2705	1	Sgeranii	PGPT0002295_2286	1
BCCO_861	PGPT0002085_1292	1	Slacri	PGPT0002700_4450	1	Sreticuliscabiei	PGPT0002630_1702	1	Sturgidiscabies	PGPT0002595_4043	1	Sgeranii	PGPT0002295_3238	1
BCCO_861	PGPT0002085_54	1	Slacri	PGPT0002700_49	1	Sreticuliscabiei	PGPT0002630_2	1	Sturgidiscabies	PGPT0002595_4890	1	Sgeranii	PGPT0002300_402	1
BCCO_861	PGPT0002115_26	1	Slacri	PGPT0002705_4531	1	Sreticuliscabiei	PGPT0002655_1781	1	Sturgidiscabies	PGPT0002595_4920	1	Sgeranii	PGPT0002300_75	1
BCCO_861	PGPT0002115_48	1	Slacri	PGPT0002705_4689	1	Sreticuliscabiei	PGPT0002655_2313	1	Sturgidiscabies	PGPT0002600_4465	1	Sgeranii	PGPT0002325_216	1
BCCO_861	PGPT0002125_60	1	Slacri	PGPT0002705_64	1	Sreticuliscabiei	PGPT0002655_3724	1	Sturgidiscabies	PGPT0002605_4	1	Sgeranii	PGPT0002375_247	1
BCCO_861	PGPT0002125_61	1	Slacri	PGPT0002710_2953	1	Sreticuliscabiei	PGPT0002660_1752	1	Sturgidiscabies	PGPT0002610_1869	1	Sgeranii	PGPT0002375_384	1
BCCO_861	PGPT0002130_154	1	Slacri	PGPT0002710_3382	1	Sreticuliscabiei	PGPT0002665_73	1	Sturgidiscabies	PGPT0002615_3532	1	Sgeranii	PGPT0002400_1148	1
BCCO_861	PGPT0002130_353	1	Slacri	PGPT0002715_1004	1	Sreticuliscabiei	PGPT0002665_957	1	Sturgidiscabies	PGPT0002620_1884	1	Sgeranii	PGPT0002400_1893	1
BCCO_861	PGPT0002130_363	1	Slacri	PGPT0002715_2121	1	Sreticuliscabiei	PGPT0002665_971	1	Sturgidiscabies	PGPT0002625_1169	1	Sgeranii	PGPT0002405_654	1
BCCO_861	PGPT0002130_377	1	Slacri	PGPT0002715_2371	1	Sreticuliscabiei	PGPT0002670_248	1	Sturgidiscabies	PGPT0002630_1702	1	Sgeranii	PGPT0002405_659	1
BCCO_861	PGPT0002130_440	1	Slacri	PGPT0002715_4478	1	Sreticuliscabiei	PGPT0002675_159	1	Sturgidiscabies	PGPT0002630_2	1	Sgeranii	PGPT0002415_114	1
BCCO_861	PGPT0002130_503	1	Slacri	PGPT0002715_4812	1	Sreticuliscabiei	PGPT0002675_223	1	Sturgidiscabies	PGPT0002655_1781	1	Sgeranii	PGPT0002415_1516	1
BCCO_861	PGPT0002130_645	1	Slacri	PGPT0002740_2058	1	Sreticuliscabiei	PGPT0002675_236	1	Sturgidiscabies	PGPT0002655_2313	1	Sgeranii	PGPT0002415_252	1
BCCO_861	PGPT0002130_653	1	Slacri	PGPT0002745_608	1	Sreticuliscabiei	PGPT0002675_329	1	Sturgidiscabies	PGPT0002655_3724	1	Sgeranii	PGPT0002415_404	1
BCCO_861	PGPT0002130_657	1	Slacri	PGPT0002750_434	1	Sreticuliscabiei	PGPT0002675_406	1	Sturgidiscabies	PGPT0002660_1752	1	Sgeranii	PGPT0002415_5853	1
BCCO_861	PGPT0002130_668	1	Slacri	PGPT0002755_1587	1	Sreticuliscabiei	PGPT0002675_53	1	Sturgidiscabies	PGPT0002660_387	1	Sgeranii	PGPT0002415_5929	1
BCCO_861	PGPT0002190_193	1	Slacri	PGPT0002760_1645	1	Sreticuliscabiei	PGPT0002675_624	1	Sturgidiscabies	PGPT0002665_73	1	Sgeranii	PGPT0002415_6249	1
BCCO_861	PGPT0002200_22	1	Slacri	PGPT0002760_594	1	Sreticuliscabiei	PGPT0002675_81	1	Sturgidiscabies	PGPT0002665_957	1	Sgeranii	PGPT0002415_6665	1
BCCO_861	PGPT0002200_71	1	Slacri	PGPT0002760_911	1	Sreticuliscabiei	PGPT0002675_867	3	Sturgidiscabies	PGPT0002665_971	1	Sgeranii	PGPT0002415_71	1
BCCO_861	PGPT0002200_8	1	Slacri	PGPT0002780_1962	1	Sreticuliscabiei	PGPT0002685_119	1	Sturgidiscabies	PGPT0002670_248	1	Sgeranii	PGPT0002415_7361	1
BCCO_861	PGPT0002205_289	1	Slacri	PGPT0002780_2063	1	Sreticuliscabiei	PGPT0002685_5	1	Sturgidiscabies	PGPT0002675_159	1	Sgeranii	PGPT0002420_1106	1
BCCO_861	PGPT0002220_774	1	Slacri	PGPT0002785_2780	1	Sreticuliscabiei	PGPT0002690_1309	1	Sturgidiscabies	PGPT0002675_223	1	Sgeranii	PGPT0002425_83	1
BCCO_861	PGPT0002220_861	1	Slacri	PGPT0002795_242	1	Sreticuliscabiei	PGPT0002690_2067	1	Sturgidiscabies	PGPT0002675_236	1	Sgeranii	PGPT0002475_46	1
BCCO_861	PGPT0002255_10	3	Slacri	PGPT0002810_16	1	Sreticuliscabiei	PGPT0002690_392	1	Sturgidiscabies	PGPT0002675_329	1	Sgeranii	PGPT0002515_251	1
BCCO_861	PGPT0002255_1021	1	Slacri	PGPT0002810_24	1	Sreticuliscabiei	PGPT0002695_541	1	Sturgidiscabies	PGPT0002675_406	1	Sgeranii	PGPT0002515_281	1
BCCO_861	PGPT0002255_38	1	Slacri	PGPT0002810_431	1	Sreticuliscabiei	PGPT0002700_1081	1	Sturgidiscabies	PGPT0002675_53	1	Sgeranii	PGPT0002515_327	1
BCCO_861	PGPT0002255_85	1	Slacri	PGPT0002815_226	1	Sreticuliscabiei	PGPT0002700_42	1	Sturgidiscabies	PGPT0002675_624	1	Sgeranii	PGPT0002515_45	1
BCCO_861	PGPT0002265_13	2	Slacri	PGPT0002815_5	1	Sreticuliscabiei	PGPT0002700_4450	1	Sturgidiscabies	PGPT0002675_81	1	Sgeranii	PGPT0002515_600	1
BCCO_861	PGPT0002265_2721	1	Slacri	PGPT0002825_886	1	Sreticuliscabiei	PGPT0002700_49	1	Sturgidiscabies	PGPT0002675_867	3	Sgeranii	PGPT0002515_631	1
BCCO_861	PGPT0002265_2860	1	Slacri	PGPT0002830_223	1	Sreticuliscabiei	PGPT0002705_1821	1	Sturgidiscabies	PGPT0002685_119	1	Sgeranii	PGPT0002570_3590	1
BCCO_861	PGPT0002265_65	1	Slacri	PGPT0002830_280	1	Sreticuliscabiei	PGPT0002705_4689	3	Sturgidiscabies	PGPT0002685_5	1	Sgeranii	PGPT0002575_1534	1
BCCO_861	PGPT0002265_6732	1	Slacri	PGPT0002830_450	1	Sreticuliscabiei	PGPT0002710_2955	1	Sturgidiscabies	PGPT0002690_1309	1	Sgeranii	PGPT0002575_1991	1
BCCO_861	PGPT0002265_7279	1	Slacri	PGPT0002830_471	1	Sreticuliscabiei	PGPT0002710_3382	1	Sturgidiscabies	PGPT0002690_2067	1	Sgeranii	PGPT0002575_2042	1
BCCO_861	PGPT0002265_7322	1	Slacri	PGPT0002830_724	1	Sreticuliscabiei	PGPT0002715_1004	1	Sturgidiscabies	PGPT0002690_392	2	Sgeranii	PGPT0002575_787	2
BCCO_861	PGPT0002265_8121	1	Slacri	PGPT0002895_420	1	Sreticuliscabiei	PGPT0002715_1667	1	Sturgidiscabies	PGPT0002695_541	1	Sgeranii	PGPT0002575_983	1
BCCO_861	PGPT0002265_850	1	Slacri	PGPT0002900_79	1	Sreticuliscabiei	PGPT0002715_4202	1	Sturgidiscabies	PGPT0002700_1081	1	Sgeranii	PGPT0002580_20	1
BCCO_861	PGPT0002270_1237	1	Slacri	PGPT0002935_1384	1	Sreticuliscabiei	PGPT0002715_4812	1	Sturgidiscabies	PGPT0002700_42	1	Sgeranii	PGPT0002595_2705	1
BCCO_861	PGPT0002270_256	1	Slacri	PGPT0002935_20	1	Sreticuliscabiei	PGPT0002715_5020	1	Sturgidiscabies	PGPT0002700_4450	1	Sgeranii	PGPT0002595_3935	1
BCCO_861	PGPT0002285_1251	1	Slacri	PGPT0002935_961	1	Sreticuliscabiei	PGPT0002740_2093	1	Sturgidiscabies	PGPT0002700_49	1	Sgeranii	PGPT0002595_4588	2
BCCO_861	PGPT0002285_1278	1	Slacri	PGPT0002940_367	1	Sreticuliscabiei	PGPT0002745_372	1	Sturgidiscabies	PGPT0002705_1821	1	Sgeranii	PGPT0002595_4890	1
BCCO_861	PGPT0002285_285	1	Slacri	PGPT0002940_471	1	Sreticuliscabiei	PGPT0002750_151	1	Sturgidiscabies	PGPT0002705_4689	3	Sgeranii	PGPT0002600_4465	1
BCCO_861	PGPT0002285_295	1	Slacri	PGPT0002940_860	1	Sreticuliscabiei	PGPT0002755_1656	1	Sturgidiscabies	PGPT0002710_2955	1	Sgeranii	PGPT0002605_4	1
BCCO_861	PGPT0002285_371	1	Slacri	PGPT0002956_132	1	Sreticuliscabiei	PGPT0002755_1738	1	Sturgidiscabies	PGPT0002710_3382	1	Sgeranii	PGPT0002605_60	1
BCCO_861	PGPT0002285_383	1	Slacri	PGPT0002956_178	1	Sreticuliscabiei	PGPT0002755_180	1	Sturgidiscabies	PGPT0002715_1004	1	Sgeranii	PGPT0002610_1870	1
BCCO_861	PGPT0002285_385	1	Slacri	PGPT0002956_293	1	Sreticuliscabiei	PGPT0002760_1645	1	Sturgidiscabies	PGPT0002715_2121	1	Sgeranii	PGPT0002610_795	1
BCCO_861	PGPT0002285_392	1	Slacri	PGPT0002985_2140	1	Sreticuliscabiei	PGPT0002760_1651	1	Sturgidiscabies	PGPT0002715_4202	1	Sgeranii	PGPT0002615_3532	1
BCCO_861	PGPT0002285_547	1	Slacri	PGPT0002985_3762	1	Sreticuliscabiei	PGPT0002770_168	1	Sturgidiscabies	PGPT0002715_5020	1	Sgeranii	PGPT0002615_854	1
BCCO_861	PGPT0002285_614	2	Slacri	PGPT0002985_5483	1	Sreticuliscabiei	PGPT0002780_1962	1	Sturgidiscabies	PGPT0002740_2093	1	Sgeranii	PGPT0002620_1862	1
BCCO_861	PGPT0002290_1927	3	Slacri	PGPT0003010_216	1	Sreticuliscabiei	PGPT0002780_2063	1	Sturgidiscabies	PGPT0002745_372	1	Sgeranii	PGPT0002620_2148	1
BCCO_861	PGPT0002295_1387	1	Slacri	PGPT0003020_1147	1	Sreticuliscabiei	PGPT0002785_2780	1	Sturgidiscabies	PGPT0002750_151	1	Sgeranii	PGPT0002625_1169	1
BCCO_861	PGPT0002295_2286	1	Slacri	PGPT0003020_3	2	Sreticuliscabiei	PGPT0002795_242	1	Sturgidiscabies	PGPT0002750_403	1	Sgeranii	PGPT0002625_197	1
BCCO_861	PGPT0002295_2816	1	Slacri	PGPT0003020_5072	1	Sreticuliscabiei	PGPT0002810_24	1	Sturgidiscabies	PGPT0002755_1587	1	Sgeranii	PGPT0002625_4029	1
BCCO_861	PGPT0002295_3236	1	Slacri	PGPT0003025_443	1	Sreticuliscabiei	PGPT0002810_643	1	Sturgidiscabies	PGPT0002755_1738	1	Sgeranii	PGPT0002625_44	1
BCCO_861	PGPT0002300_402	1	Slacri	PGPT0003030_142	1	Sreticuliscabiei	PGPT0002815_14	1	Sturgidiscabies	PGPT0002760_1645	1	Sgeranii	PGPT0002630_2	1
BCCO_861	PGPT0002325_26	1	Slacri	PGPT0003030_193	1	Sreticuliscabiei	PGPT0002815_226	1	Sturgidiscabies	PGPT0002760_1651	1	Sgeranii	PGPT0002630_2046	1
BCCO_861	PGPT0002340_160	1	Slacri	PGPT0003035_1912	1	Sreticuliscabiei	PGPT0002815_5	1	Sturgidiscabies	PGPT0002760_911	1	Sgeranii	PGPT0002655_1781	1
BCCO_861	PGPT0002375_19	1	Slacri	PGPT0003040_14	1	Sreticuliscabiei	PGPT0002825_889	1	Sturgidiscabies	PGPT0002770_168	1	Sgeranii	PGPT0002655_3724	1
BCCO_861	PGPT0002400_1148	1	Slacri	PGPT0003040_16	1	Sreticuliscabiei	PGPT0002830_223	1	Sturgidiscabies	PGPT0002780_1962	1	Sgeranii	PGPT0002665_261	1
BCCO_861	PGPT0002405_462	1	Slacri	PGPT0003040_2039	1	Sreticuliscabiei	PGPT0002830_471	1	Sturgidiscabies	PGPT0002780_2063	1	Sgeranii	PGPT0002665_479	1
BCCO_861	PGPT0002415_1449	1	Slacri	PGPT0003040_455	1	Sreticuliscabiei	PGPT0002830_633	1	Sturgidiscabies	PGPT0002785_2780	1	Sgeranii	PGPT0002665_73	1
BCCO_861	PGPT0002415_1552	1	Slacri	PGPT0003040_571	1	Sreticuliscabiei	PGPT0002830_724	1	Sturgidiscabies	PGPT0002795_242	1	Sgeranii	PGPT0002665_971	1
BCCO_861	PGPT0002415_252	1	Slacri	PGPT0003040_817	1	Sreticuliscabiei	PGPT0002895_420	1	Sturgidiscabies	PGPT0002810_24	1	Sgeranii	PGPT0002670_210	1
BCCO_861	PGPT0002415_391	1	Slacri	PGPT0003045_1706	1	Sreticuliscabiei	PGPT0002900_513	1	Sturgidiscabies	PGPT0002810_643	1	Sgeranii	PGPT0002675_10	1
BCCO_861	PGPT0002415_404	1	Slacri	PGPT0003045_696	1	Sreticuliscabiei	PGPT0002935_1384	1	Sturgidiscabies	PGPT0002815_14	1	Sgeranii	PGPT0002675_159	1
BCCO_861	PGPT0002415_43	1	Slacri	PGPT0003080_6	1	Sreticuliscabiei	PGPT0002935_20	2	Sturgidiscabies	PGPT0002815_226	1	Sgeranii	PGPT0002675_236	1
BCCO_861	PGPT0002415_5853	1	Slacri	PGPT0003080_7	2	Sreticuliscabiei	PGPT0002935_961	1	Sturgidiscabies	PGPT0002815_23	1	Sgeranii	PGPT0002675_53	1
BCCO_861	PGPT0002415_5929	1	Slacri	PGPT0003085_20	1	Sreticuliscabiei	PGPT0002940_367	1	Sturgidiscabies	PGPT0002815_5	1	Sgeranii	PGPT0002675_624	1
BCCO_861	PGPT0002415_6231	1	Slacri	PGPT0003085_24	1	Sreticuliscabiei	PGPT0002940_471	1	Sturgidiscabies	PGPT0002825_727	1	Sgeranii	PGPT0002675_81	1
BCCO_861	PGPT0002415_6421	1	Slacri	PGPT0003085_62	1	Sreticuliscabiei	PGPT0002940_651	1	Sturgidiscabies	PGPT0002825_889	1	Sgeranii	PGPT0002675_867	3
BCCO_861	PGPT0002415_6762	1	Slacri	PGPT0003119_1	1	Sreticuliscabiei	PGPT0002940_860	1	Sturgidiscabies	PGPT0002830_223	1	Sgeranii	PGPT0002685_148	1
BCCO_861	PGPT0002425_83	1	Slacri	PGPT0003175_16	1	Sreticuliscabiei	PGPT0002956_132	1	Sturgidiscabies	PGPT0002830_471	1	Sgeranii	PGPT0002685_5	1
BCCO_861	PGPT0002475_52	1	Slacri	PGPT0003180_10418	1	Sreticuliscabiei	PGPT0002956_133	1	Sturgidiscabies	PGPT0002830_633	1	Sgeranii	PGPT0002690_2069	1
BCCO_861	PGPT0002480_1070	1	Slacri	PGPT0003180_11584	1	Sreticuliscabiei	PGPT0002956_178	1	Sturgidiscabies	PGPT0002830_724	1	Sgeranii	PGPT0002695_541	1
BCCO_861	PGPT0002485_26	1	Slacri	PGPT0003180_11993	1	Sreticuliscabiei	PGPT0002956_293	1	Sturgidiscabies	PGPT0002895_420	1	Sgeranii	PGPT0002700_1081	1
BCCO_861	PGPT0002500_1	1	Slacri	PGPT0003180_13490	1	Sreticuliscabiei	PGPT0002985_3010	1	Sturgidiscabies	PGPT0002900_513	1	Sgeranii	PGPT0002700_49	1
BCCO_861	PGPT0002515_189	1	Slacri	PGPT0003180_13618	1	Sreticuliscabiei	PGPT0002985_3762	1	Sturgidiscabies	PGPT0002935_1384	1	Sgeranii	PGPT0002705_4531	1
BCCO_861	PGPT0002515_205	2	Slacri	PGPT0003180_13630	1	Sreticuliscabiei	PGPT0002985_5483	1	Sturgidiscabies	PGPT0002935_20	2	Sgeranii	PGPT0002705_4689	2
BCCO_861	PGPT0002515_209	1	Slacri	PGPT0003180_15714	1	Sreticuliscabiei	PGPT0003010_216	1	Sturgidiscabies	PGPT0002935_961	1	Sgeranii	PGPT0002705_64	1
BCCO_861	PGPT0002515_281	1	Slacri	PGPT0003180_15991	1	Sreticuliscabiei	PGPT0003020_1333	1	Sturgidiscabies	PGPT0002940_367	1	Sgeranii	PGPT0002710_2955	1
BCCO_861	PGPT0002515_4	1	Slacri	PGPT0003180_1815	1	Sreticuliscabiei	PGPT0003020_1579	1	Sturgidiscabies	PGPT0002940_471	1	Sgeranii	PGPT0002710_3382	1
BCCO_861	PGPT0002515_87	1	Slacri	PGPT0003180_18868	1	Sreticuliscabiei	PGPT0003020_3	2	Sturgidiscabies	PGPT0002940_651	1	Sgeranii	PGPT0002715_1004	1
BCCO_861	PGPT0002535_74	1	Slacri	PGPT0003180_20058	1	Sreticuliscabiei	PGPT0003020_5098	1	Sturgidiscabies	PGPT0002940_860	1	Sgeranii	PGPT0002715_2121	1
BCCO_861	PGPT0002570_3590	1	Slacri	PGPT0003180_22471	1	Sreticuliscabiei	PGPT0003025_410	1	Sturgidiscabies	PGPT0002956_132	1	Sgeranii	PGPT0002715_2371	1
BCCO_861	PGPT0002575_1534	1	Slacri	PGPT0003180_23088	1	Sreticuliscabiei	PGPT0003025_848	1	Sturgidiscabies	PGPT0002956_133	1	Sgeranii	PGPT0002715_4110	1
BCCO_861	PGPT0002575_1571	1	Slacri	PGPT0003180_2522	1	Sreticuliscabiei	PGPT0003030_142	1	Sturgidiscabies	PGPT0002956_176	1	Sgeranii	PGPT0002715_4939	1
BCCO_861	PGPT0002575_1996	1	Slacri	PGPT0003180_2702	1	Sreticuliscabiei	PGPT0003030_323	1	Sturgidiscabies	PGPT0002956_293	1	Sgeranii	PGPT0002720_2270	1
BCCO_861	PGPT0002575_2004	1	Slacri	PGPT0003180_3838	1	Sreticuliscabiei	PGPT0003035_1912	1	Sturgidiscabies	PGPT0002985_3010	1	Sgeranii	PGPT0002740_2153	1
BCCO_861	PGPT0002575_2042	1	Slacri	PGPT0003180_706	1	Sreticuliscabiei	PGPT0003035_991	1	Sturgidiscabies	PGPT0002985_3762	1	Sgeranii	PGPT0002745_372	1
BCCO_861	PGPT0002575_787	2	Slacri	PGPT0003180_7168	1	Sreticuliscabiei	PGPT0003040_1059	1	Sturgidiscabies	PGPT0002985_5483	1	Sgeranii	PGPT0002750_427	1
BCCO_861	PGPT0002575_983	1	Slacri	PGPT0003180_7367	1	Sreticuliscabiei	PGPT0003040_1296	1	Sturgidiscabies	PGPT0003010_216	1	Sgeranii	PGPT0002755_1587	1
BCCO_861	PGPT0002580_20	1	Slacri	PGPT0003180_7540	1	Sreticuliscabiei	PGPT0003040_1561	1	Sturgidiscabies	PGPT0003020_1333	1	Sgeranii	PGPT0002755_1678	1
BCCO_861	PGPT0002580_3	1	Slacri	PGPT0003180_8040	1	Sreticuliscabiei	PGPT0003040_16	2	Sturgidiscabies	PGPT0003020_1579	1	Sgeranii	PGPT0002755_1861	1
BCCO_861	PGPT0002595_2705	1	Slacri	PGPT0003180_8213	1	Sreticuliscabiei	PGPT0003040_164	1	Sturgidiscabies	PGPT0003020_3	2	Sgeranii	PGPT0002760_128	1
BCCO_861	PGPT0002595_3505	1	Slacri	PGPT0003180_8742	1	Sreticuliscabiei	PGPT0003040_2039	1	Sturgidiscabies	PGPT0003020_5098	1	Sgeranii	PGPT0002760_1724	1
BCCO_861	PGPT0002595_3965	1	Slacri	PGPT0003180_9358	1	Sreticuliscabiei	PGPT0003040_762	1	Sturgidiscabies	PGPT0003025_410	1	Sgeranii	PGPT0002760_305	1
BCCO_861	PGPT0002595_4043	1	Slacri	PGPT0003180_946	2	Sreticuliscabiei	PGPT0003045_1706	1	Sturgidiscabies	PGPT0003025_848	1	Sgeranii	PGPT0002760_911	1
BCCO_861	PGPT0002595_4588	1	Slacri	PGPT0003180_9840	1	Sreticuliscabiei	PGPT0003045_744	1	Sturgidiscabies	PGPT0003030_142	1	Sgeranii	PGPT0002770_168	1
BCCO_861	PGPT0002595_4986	1	Slacri	PGPT0003180_987	1	Sreticuliscabiei	PGPT0003065_2	1	Sturgidiscabies	PGPT0003030_323	1	Sgeranii	PGPT0002780_1968	1
BCCO_861	PGPT0002595_5192	1	Slacri	PGPT0003200_1201	1	Sreticuliscabiei	PGPT0003065_207	1	Sturgidiscabies	PGPT0003035_1912	1	Sgeranii	PGPT0002780_2055	1
BCCO_861	PGPT0002600_4506	1	Slacri	PGPT0003200_3018	1	Sreticuliscabiei	PGPT0003080_6	1	Sturgidiscabies	PGPT0003035_991	1	Sgeranii	PGPT0002785_2780	1
BCCO_861	PGPT0002605_4	1	Slacri	PGPT0003215_11	1	Sreticuliscabiei	PGPT0003085_20	1	Sturgidiscabies	PGPT0003040_1059	1	Sgeranii	PGPT0002795_2141	1
BCCO_861	PGPT0002605_60	1	Slacri	PGPT0003230_375	1	Sreticuliscabiei	PGPT0003085_62	1	Sturgidiscabies	PGPT0003040_1296	1	Sgeranii	PGPT0002795_248	1
BCCO_861	PGPT0002610_1869	1	Slacri	PGPT0003230_395	1	Sreticuliscabiei	PGPT0003085_63	1	Sturgidiscabies	PGPT0003040_1561	1	Sgeranii	PGPT0002810_24	1
BCCO_861	PGPT0002615_3601	1	Slacri	PGPT0003255_432	1	Sreticuliscabiei	PGPT0003116_1	1	Sturgidiscabies	PGPT0003040_16	2	Sgeranii	PGPT0002810_712	1
BCCO_861	PGPT0002620_1862	1	Slacri	PGPT0003255_520	1	Sreticuliscabiei	PGPT0003116_5	1	Sturgidiscabies	PGPT0003040_164	1	Sgeranii	PGPT0002815_152	1
BCCO_861	PGPT0002625_1169	1	Slacri	PGPT0003255_558	1	Sreticuliscabiei	PGPT0003119_1	1	Sturgidiscabies	PGPT0003040_2039	1	Sgeranii	PGPT0002815_5	1
BCCO_861	PGPT0002630_2	1	Slacri	PGPT0003255_654	1	Sreticuliscabiei	PGPT0003152_1	1	Sturgidiscabies	PGPT0003040_762	2	Sgeranii	PGPT0002815_7	1
BCCO_861	PGPT0002630_2098	1	Slacri	PGPT0003255_72	1	Sreticuliscabiei	PGPT0003165_31	1	Sturgidiscabies	PGPT0003045_1706	1	Sgeranii	PGPT0002825_886	1
BCCO_861	PGPT0002655_1774	1	Slacri	PGPT0003255_86	1	Sreticuliscabiei	PGPT0003175_16	1	Sturgidiscabies	PGPT0003045_744	1	Sgeranii	PGPT0002830_223	1
BCCO_861	PGPT0002655_3724	1	Slacri	PGPT0003290_97	1	Sreticuliscabiei	PGPT0003180_10501	1	Sturgidiscabies	PGPT0003065_2	1	Sgeranii	PGPT0002830_276	1
BCCO_861	PGPT0002665_1490	1	Slacri	PGPT0003310_307	1	Sreticuliscabiei	PGPT0003180_11248	1	Sturgidiscabies	PGPT0003065_207	1	Sgeranii	PGPT0002830_432	1
BCCO_861	PGPT0002665_539	1	Slacri	PGPT0003360_7	1	Sreticuliscabiei	PGPT0003180_11416	1	Sturgidiscabies	PGPT0003080_6	2	Sgeranii	PGPT0002830_595	1
BCCO_861	PGPT0002665_73	1	Slacri	PGPT0003360_9	1	Sreticuliscabiei	PGPT0003180_11435	1	Sturgidiscabies	PGPT0003085_20	1	Sgeranii	PGPT0002830_633	1
BCCO_861	PGPT0002665_971	1	Slacri	PGPT0003370_110	1	Sreticuliscabiei	PGPT0003180_12452	1	Sturgidiscabies	PGPT0003085_62	1	Sgeranii	PGPT0002830_724	1
BCCO_861	PGPT0002670_294	1	Slacri	PGPT0003370_645	1	Sreticuliscabiei	PGPT0003180_12557	1	Sturgidiscabies	PGPT0003085_63	1	Sgeranii	PGPT0002895_420	1
BCCO_861	PGPT0002675_10	1	Slacri	PGPT0003375_12	1	Sreticuliscabiei	PGPT0003180_1266	1	Sturgidiscabies	PGPT0003116_4	1	Sgeranii	PGPT0002900_513	1
BCCO_861	PGPT0002675_159	2	Slacri	PGPT0003390_253	1	Sreticuliscabiei	PGPT0003180_1274	1	Sturgidiscabies	PGPT0003116_5	1	Sgeranii	PGPT0002935_1384	1
BCCO_861	PGPT0002675_33	1	Slacri	PGPT0003395_226	1	Sreticuliscabiei	PGPT0003180_12860	1	Sturgidiscabies	PGPT0003119_1	1	Sgeranii	PGPT0002935_961	1
BCCO_861	PGPT0002675_624	1	Slacri	PGPT0003395_340	1	Sreticuliscabiei	PGPT0003180_13462	1	Sturgidiscabies	PGPT0003152_1	1	Sgeranii	PGPT0002940_152	1
BCCO_861	PGPT0002675_81	1	Slacri	PGPT0003420_86	1	Sreticuliscabiei	PGPT0003180_13618	1	Sturgidiscabies	PGPT0003165_18	1	Sgeranii	PGPT0002940_367	1
BCCO_861	PGPT0002675_867	3	Slacri	PGPT0003440_269	1	Sreticuliscabiei	PGPT0003180_14570	1	Sturgidiscabies	PGPT0003165_31	1	Sgeranii	PGPT0002940_860	1
BCCO_861	PGPT0002685_119	1	Slacri	PGPT0003440_270	1	Sreticuliscabiei	PGPT0003180_15520	1	Sturgidiscabies	PGPT0003175_16	1	Sgeranii	PGPT0002956_132	2
BCCO_861	PGPT0002685_86	1	Slacri	PGPT0003440_5	2	Sreticuliscabiei	PGPT0003180_17200	1	Sturgidiscabies	PGPT0003180_10501	1	Sgeranii	PGPT0002956_133	1
BCCO_861	PGPT0002690_1309	1	Slacri	PGPT0003440_6	1	Sreticuliscabiei	PGPT0003180_1815	1	Sturgidiscabies	PGPT0003180_11248	1	Sgeranii	PGPT0002956_178	1
BCCO_861	PGPT0002690_971	1	Slacri	PGPT0003455_61	1	Sreticuliscabiei	PGPT0003180_19389	1	Sturgidiscabies	PGPT0003180_11416	1	Sgeranii	PGPT0002956_293	1
BCCO_861	PGPT0002695_541	1	Slacri	PGPT0003470_11	1	Sreticuliscabiei	PGPT0003180_21528	1	Sturgidiscabies	PGPT0003180_11435	1	Sgeranii	PGPT0002985_2042	1
BCCO_861	PGPT0002700_1081	1	Slacri	PGPT0003470_35	1	Sreticuliscabiei	PGPT0003180_21552	1	Sturgidiscabies	PGPT0003180_11584	1	Sgeranii	PGPT0002985_3762	1
BCCO_861	PGPT0002700_37	1	Slacri	PGPT0003535_20	1	Sreticuliscabiei	PGPT0003180_22017	1	Sturgidiscabies	PGPT0003180_11719	1	Sgeranii	PGPT0002985_5483	1
BCCO_861	PGPT0002700_4450	1	Slacri	PGPT0003580_557	1	Sreticuliscabiei	PGPT0003180_22471	1	Sturgidiscabies	PGPT0003180_12216	1	Sgeranii	PGPT0003010_216	1
BCCO_861	PGPT0002700_49	1	Slacri	PGPT0003580_853	1	Sreticuliscabiei	PGPT0003180_23088	1	Sturgidiscabies	PGPT0003180_12452	1	Sgeranii	PGPT0003020_1364	1
BCCO_861	PGPT0002705_4531	1	Slacri	PGPT0003605_11	1	Sreticuliscabiei	PGPT0003180_2522	2	Sturgidiscabies	PGPT0003180_12557	1	Sgeranii	PGPT0003020_1579	1
BCCO_861	PGPT0002705_4689	1	Slacri	PGPT0003605_12	1	Sreticuliscabiei	PGPT0003180_2726	1	Sturgidiscabies	PGPT0003180_1266	1	Sgeranii	PGPT0003020_3	3
BCCO_861	PGPT0002705_64	1	Slacri	PGPT0003605_8	1	Sreticuliscabiei	PGPT0003180_2758	1	Sturgidiscabies	PGPT0003180_1274	1	Sgeranii	PGPT0003025_1341	1
BCCO_861	PGPT0002710_2953	1	Slacri	PGPT0003625_779	1	Sreticuliscabiei	PGPT0003180_3357	1	Sturgidiscabies	PGPT0003180_12860	1	Sgeranii	PGPT0003025_2200	1
BCCO_861	PGPT0002710_3382	1	Slacri	PGPT0003625_851	1	Sreticuliscabiei	PGPT0003180_4755	1	Sturgidiscabies	PGPT0003180_13462	1	Sgeranii	PGPT0003025_2392	1
BCCO_861	PGPT0002715_1743	1	Slacri	PGPT0003635_115	1	Sreticuliscabiei	PGPT0003180_706	2	Sturgidiscabies	PGPT0003180_13618	1	Sgeranii	PGPT0003025_443	1
BCCO_861	PGPT0002715_2121	1	Slacri	PGPT0003650_41	1	Sreticuliscabiei	PGPT0003180_7091	1	Sturgidiscabies	PGPT0003180_14570	1	Sgeranii	PGPT0003025_848	1
BCCO_861	PGPT0002715_4202	1	Slacri	PGPT0003655_4860	1	Sreticuliscabiei	PGPT0003180_7365	1	Sturgidiscabies	PGPT0003180_15520	1	Sgeranii	PGPT0003030_142	1
BCCO_861	PGPT0002740_2088	1	Slacri	PGPT0003655_4967	1	Sreticuliscabiei	PGPT0003180_7367	1	Sturgidiscabies	PGPT0003180_17200	1	Sgeranii	PGPT0003030_193	1
BCCO_861	PGPT0002740_2276	1	Slacri	PGPT0003660_1630	1	Sreticuliscabiei	PGPT0003180_7400	1	Sturgidiscabies	PGPT0003180_1815	1	Sgeranii	PGPT0003030_346	1
BCCO_861	PGPT0002745_2282	1	Slacri	PGPT0003660_3147	1	Sreticuliscabiei	PGPT0003180_7540	1	Sturgidiscabies	PGPT0003180_19389	1	Sgeranii	PGPT0003035_1899	1
BCCO_861	PGPT0002745_231	1	Slacri	PGPT0003660_5118	1	Sreticuliscabiei	PGPT0003180_8040	1	Sturgidiscabies	PGPT0003180_20292	1	Sgeranii	PGPT0003035_1912	1
BCCO_861	PGPT0002750_151	1	Slacri	PGPT0003665_138	1	Sreticuliscabiei	PGPT0003180_8355	1	Sturgidiscabies	PGPT0003180_21528	1	Sgeranii	PGPT0003035_991	1
BCCO_861	PGPT0002755_1583	1	Slacri	PGPT0003670_114	1	Sreticuliscabiei	PGPT0003180_8382	1	Sturgidiscabies	PGPT0003180_21552	1	Sgeranii	PGPT0003040_1296	1
BCCO_861	PGPT0002755_1666	2	Slacri	PGPT0003680_1675	1	Sreticuliscabiei	PGPT0003180_8796	1	Sturgidiscabies	PGPT0003180_22471	1	Sgeranii	PGPT0003040_13	4
BCCO_861	PGPT0002755_1730	1	Slacri	PGPT0003690_10	1	Sreticuliscabiei	PGPT0003180_9358	1	Sturgidiscabies	PGPT0003180_23088	1	Sgeranii	PGPT0003040_1411	1
BCCO_861	PGPT0002760_1597	1	Slacri	PGPT0003690_1705	1	Sreticuliscabiei	PGPT0003180_946	2	Sturgidiscabies	PGPT0003180_2522	2	Sgeranii	PGPT0003040_15	1
BCCO_861	PGPT0002760_1724	1	Slacri	PGPT0003700_261	1	Sreticuliscabiei	PGPT0003180_9600	1	Sturgidiscabies	PGPT0003180_2726	1	Sgeranii	PGPT0003040_16	4
BCCO_861	PGPT0002760_1776	1	Slacri	PGPT0003710_1414	1	Sreticuliscabiei	PGPT0003180_966	1	Sturgidiscabies	PGPT0003180_2758	1	Sgeranii	PGPT0003040_1854	1
BCCO_861	PGPT0002780_1962	1	Slacri	PGPT0003715_395	1	Sreticuliscabiei	PGPT0003180_971	1	Sturgidiscabies	PGPT0003180_3357	1	Sgeranii	PGPT0003040_2171	1
BCCO_861	PGPT0002780_2055	1	Slacri	PGPT0003720_1114	1	Sreticuliscabiei	PGPT0003180_987	1	Sturgidiscabies	PGPT0003180_4755	1	Sgeranii	PGPT0003040_881	1
BCCO_861	PGPT0002785_2771	1	Slacri	PGPT0003720_57	1	Sreticuliscabiei	PGPT0003200_1201	1	Sturgidiscabies	PGPT0003180_706	2	Sgeranii	PGPT0003045_1664	1
BCCO_861	PGPT0002785_3086	1	Slacri	PGPT0003720_785	1	Sreticuliscabiei	PGPT0003200_3018	1	Sturgidiscabies	PGPT0003180_7091	1	Sgeranii	PGPT0003045_1706	1
BCCO_861	PGPT0002795_248	1	Slacri	PGPT0003725_2142	1	Sreticuliscabiei	PGPT0003210_330	1	Sturgidiscabies	PGPT0003180_7365	1	Sgeranii	PGPT0003045_2103	1
BCCO_861	PGPT0002810_24	1	Slacri	PGPT0003725_3095	1	Sreticuliscabiei	PGPT0003210_337	1	Sturgidiscabies	PGPT0003180_7367	1	Sgeranii	PGPT0003045_744	1
BCCO_861	PGPT0002810_431	1	Slacri	PGPT0003730_3572	1	Sreticuliscabiei	PGPT0003215_179	1	Sturgidiscabies	PGPT0003180_7400	1	Sgeranii	PGPT0003065_2	1
BCCO_861	PGPT0002815_169	1	Slacri	PGPT0003735_3124	1	Sreticuliscabiei	PGPT0003230_385	1	Sturgidiscabies	PGPT0003180_7540	1	Sgeranii	PGPT0003065_207	1
BCCO_861	PGPT0002815_226	1	Slacri	PGPT0003760_105	1	Sreticuliscabiei	PGPT0003230_57	1	Sturgidiscabies	PGPT0003180_8040	1	Sgeranii	PGPT0003075_3	1
BCCO_861	PGPT0002815_5	2	Slacri	PGPT0003760_249	1	Sreticuliscabiei	PGPT0003250_168	1	Sturgidiscabies	PGPT0003180_8796	1	Sgeranii	PGPT0003080_2	1
BCCO_861	PGPT0002820_7	2	Slacri	PGPT0003760_3202	1	Sreticuliscabiei	PGPT0003255_520	1	Sturgidiscabies	PGPT0003180_9270	1	Sgeranii	PGPT0003080_6	1
BCCO_861	PGPT0002825_889	1	Slacri	PGPT0003760_386	1	Sreticuliscabiei	PGPT0003255_654	1	Sturgidiscabies	PGPT0003180_9358	1	Sgeranii	PGPT0003085_20	1
BCCO_861	PGPT0002830_179	1	Slacri	PGPT0003760_4309	1	Sreticuliscabiei	PGPT0003255_693	1	Sturgidiscabies	PGPT0003180_946	2	Sgeranii	PGPT0003085_24	2
BCCO_861	PGPT0002830_223	1	Slacri	PGPT0003760_5529	1	Sreticuliscabiei	PGPT0003255_86	1	Sturgidiscabies	PGPT0003180_9585	1	Sgeranii	PGPT0003116_4	1
BCCO_861	PGPT0002830_412	1	Slacri	PGPT0003760_9192	1	Sreticuliscabiei	PGPT0003290_121	1	Sturgidiscabies	PGPT0003180_9600	1	Sgeranii	PGPT0003116_7	1
BCCO_861	PGPT0002830_450	1	Slacri	PGPT0003765_11013	1	Sreticuliscabiei	PGPT0003290_46	1	Sturgidiscabies	PGPT0003180_966	1	Sgeranii	PGPT0003119_1	1
BCCO_861	PGPT0002830_471	1	Slacri	PGPT0003765_148	1	Sreticuliscabiei	PGPT0003290_6	1	Sturgidiscabies	PGPT0003180_971	1	Sgeranii	PGPT0003152_1	1
BCCO_861	PGPT0002830_724	1	Slacri	PGPT0003765_2771	1	Sreticuliscabiei	PGPT0003290_62	1	Sturgidiscabies	PGPT0003180_987	1	Sgeranii	PGPT0003165_15	1
BCCO_861	PGPT0002830_740	1	Slacri	PGPT0003765_2896	1	Sreticuliscabiei	PGPT0003310_307	1	Sturgidiscabies	PGPT0003190_64	1	Sgeranii	PGPT0003165_82	1
BCCO_861	PGPT0002855_1	1	Slacri	PGPT0003765_3336	1	Sreticuliscabiei	PGPT0003316_3	1	Sturgidiscabies	PGPT0003200_1201	1	Sgeranii	PGPT0003175_16	1
BCCO_861	PGPT0002895_490	1	Slacri	PGPT0003765_4306	1	Sreticuliscabiei	PGPT0003370_110	1	Sturgidiscabies	PGPT0003200_3018	1	Sgeranii	PGPT0003180_10764	1
BCCO_861	PGPT0002900_79	1	Slacri	PGPT0003765_5737	1	Sreticuliscabiei	PGPT0003370_378	1	Sturgidiscabies	PGPT0003210_330	1	Sgeranii	PGPT0003180_11584	1
BCCO_861	PGPT0002935_1041	1	Slacri	PGPT0003765_9569	1	Sreticuliscabiei	PGPT0003370_795	1	Sturgidiscabies	PGPT0003210_337	1	Sgeranii	PGPT0003180_11993	1
BCCO_861	PGPT0002935_1275	1	Slacri	PGPT0003770_2785	1	Sreticuliscabiei	PGPT0003375_12	1	Sturgidiscabies	PGPT0003215_179	1	Sgeranii	PGPT0003180_12401	1
BCCO_861	PGPT0002935_1384	1	Slacri	PGPT0003770_3412	1	Sreticuliscabiei	PGPT0003390_253	1	Sturgidiscabies	PGPT0003230_385	1	Sgeranii	PGPT0003180_12460	1
BCCO_861	PGPT0002935_1409	1	Slacri	PGPT0003770_3814	1	Sreticuliscabiei	PGPT0003395_226	1	Sturgidiscabies	PGPT0003230_57	1	Sgeranii	PGPT0003180_12557	1
BCCO_861	PGPT0002935_20	3	Slacri	PGPT0003770_4713	1	Sreticuliscabiei	PGPT0003420_86	1	Sturgidiscabies	PGPT0003250_168	1	Sgeranii	PGPT0003180_1274	1
BCCO_861	PGPT0002940_1355	1	Slacri	PGPT0003770_5927	1	Sreticuliscabiei	PGPT0003440_145	1	Sturgidiscabies	PGPT0003255_520	1	Sgeranii	PGPT0003180_1275	1
BCCO_861	PGPT0002940_367	1	Slacri	PGPT0003770_681	1	Sreticuliscabiei	PGPT0003440_270	1	Sturgidiscabies	PGPT0003255_654	1	Sgeranii	PGPT0003180_12860	1
BCCO_861	PGPT0002940_860	1	Slacri	PGPT0003770_694	1	Sreticuliscabiei	PGPT0003440_4	1	Sturgidiscabies	PGPT0003255_693	1	Sgeranii	PGPT0003180_13040	1
BCCO_861	PGPT0002956_118	1	Slacri	PGPT0003770_8179	1	Sreticuliscabiei	PGPT0003440_5	1	Sturgidiscabies	PGPT0003255_86	1	Sgeranii	PGPT0003180_13462	1
BCCO_861	PGPT0002956_132	1	Slacri	PGPT0003770_8909	1	Sreticuliscabiei	PGPT0003470_113	1	Sturgidiscabies	PGPT0003290_326	1	Sgeranii	PGPT0003180_1481	1
BCCO_861	PGPT0002956_133	1	Slacri	PGPT0003880_1109	1	Sreticuliscabiei	PGPT0003470_51	1	Sturgidiscabies	PGPT0003290_46	1	Sgeranii	PGPT0003180_15520	1
BCCO_861	PGPT0002956_293	1	Slacri	PGPT0003880_1341	1	Sreticuliscabiei	PGPT0003470_92	1	Sturgidiscabies	PGPT0003290_62	1	Sgeranii	PGPT0003180_16300	1
BCCO_861	PGPT0002956_696	1	Slacri	PGPT0003880_4073	1	Sreticuliscabiei	PGPT0003535_16	1	Sturgidiscabies	PGPT0003290_97	1	Sgeranii	PGPT0003180_16637	1
BCCO_861	PGPT0002985_2789	1	Slacri	PGPT0003890_635	1	Sreticuliscabiei	PGPT0003580_294	1	Sturgidiscabies	PGPT0003310_307	1	Sgeranii	PGPT0003180_17200	1
BCCO_861	PGPT0002985_3762	1	Slacri	PGPT0003906_48	1	Sreticuliscabiei	PGPT0003605_11	1	Sturgidiscabies	PGPT0003316_3	1	Sgeranii	PGPT0003180_18003	1
BCCO_861	PGPT0002985_5483	1	Slacri	PGPT0003907_5	1	Sreticuliscabiei	PGPT0003605_12	1	Sturgidiscabies	PGPT0003370_110	1	Sgeranii	PGPT0003180_1815	2
BCCO_861	PGPT0003010_216	1	Slacri	PGPT0003915_881	1	Sreticuliscabiei	PGPT0003625_851	1	Sturgidiscabies	PGPT0003370_1204	1	Sgeranii	PGPT0003180_18516	1
BCCO_861	PGPT0003020_1333	1	Slacri	PGPT0003920_2	1	Sreticuliscabiei	PGPT0003635_115	1	Sturgidiscabies	PGPT0003370_378	1	Sgeranii	PGPT0003180_19389	1
BCCO_861	PGPT0003020_3	3	Slacri	PGPT0003925_382	1	Sreticuliscabiei	PGPT0003650_41	1	Sturgidiscabies	PGPT0003370_795	1	Sgeranii	PGPT0003180_21555	1
BCCO_861	PGPT0003020_4539	1	Slacri	PGPT0003935_2494	1	Sreticuliscabiei	PGPT0003655_1832	1	Sturgidiscabies	PGPT0003375_12	1	Sgeranii	PGPT0003180_21584	1
BCCO_861	PGPT0003025_1341	1	Slacri	PGPT0003965_1391	1	Sreticuliscabiei	PGPT0003660_1630	1	Sturgidiscabies	PGPT0003390_253	1	Sgeranii	PGPT0003180_21651	1
BCCO_861	PGPT0003025_2392	1	Slacri	PGPT0003975_525	1	Sreticuliscabiei	PGPT0003660_3147	1	Sturgidiscabies	PGPT0003395_226	1	Sgeranii	PGPT0003180_21700	1
BCCO_861	PGPT0003025_2394	1	Slacri	PGPT0003985_1014	1	Sreticuliscabiei	PGPT0003665_169	1	Sturgidiscabies	PGPT0003420_86	1	Sgeranii	PGPT0003180_21776	1
BCCO_861	PGPT0003025_443	1	Slacri	PGPT0003985_1021	1	Sreticuliscabiei	PGPT0003670_110	1	Sturgidiscabies	PGPT0003440_145	1	Sgeranii	PGPT0003180_22471	1
BCCO_861	PGPT0003025_848	1	Slacri	PGPT0003985_1213	1	Sreticuliscabiei	PGPT0003680_1675	1	Sturgidiscabies	PGPT0003440_270	1	Sgeranii	PGPT0003180_23088	1
BCCO_861	PGPT0003030_182	1	Slacri	PGPT0003985_1241	1	Sreticuliscabiei	PGPT0003690_1702	1	Sturgidiscabies	PGPT0003440_4	1	Sgeranii	PGPT0003180_2522	2
BCCO_861	PGPT0003030_313	1	Slacri	PGPT0003985_187	1	Sreticuliscabiei	PGPT0003700_261	1	Sturgidiscabies	PGPT0003440_5	1	Sgeranii	PGPT0003180_2702	1
BCCO_861	PGPT0003030_346	1	Slacri	PGPT0003985_43	1	Sreticuliscabiei	PGPT0003700_3546	1	Sturgidiscabies	PGPT0003470_113	1	Sgeranii	PGPT0003180_2758	1
BCCO_861	PGPT0003030_698	1	Slacri	PGPT0003985_9	1	Sreticuliscabiei	PGPT0003710_1432	1	Sturgidiscabies	PGPT0003470_51	1	Sgeranii	PGPT0003180_2803	1
BCCO_861	PGPT0003035_1912	1	Slacri	PGPT0004005_14	1	Sreticuliscabiei	PGPT0003710_94	2	Sturgidiscabies	PGPT0003470_92	1	Sgeranii	PGPT0003180_2924	1
BCCO_861	PGPT0003035_991	1	Slacri	PGPT0004005_196	1	Sreticuliscabiei	PGPT0003715_365	1	Sturgidiscabies	PGPT0003535_16	1	Sgeranii	PGPT0003180_3357	1
BCCO_861	PGPT0003040_1296	1	Slacri	PGPT0004005_38	1	Sreticuliscabiei	PGPT0003715_395	1	Sturgidiscabies	PGPT0003580_294	1	Sgeranii	PGPT0003180_3898	1
BCCO_861	PGPT0003040_13	1	Slacri	PGPT0004005_53	1	Sreticuliscabiei	PGPT0003720_1114	1	Sturgidiscabies	PGPT0003605_11	1	Sgeranii	PGPT0003180_4072	1
BCCO_861	PGPT0003040_16	2	Slacri	PGPT0004005_7	1	Sreticuliscabiei	PGPT0003720_114	2	Sturgidiscabies	PGPT0003605_12	1	Sgeranii	PGPT0003180_4119	1
BCCO_861	PGPT0003040_1854	2	Slacri	PGPT0004015_131	1	Sreticuliscabiei	PGPT0003720_57	1	Sturgidiscabies	PGPT0003625_851	1	Sgeranii	PGPT0003180_4179	1
BCCO_861	PGPT0003040_1875	1	Slacri	PGPT0004015_2587	1	Sreticuliscabiei	PGPT0003720_618	1	Sturgidiscabies	PGPT0003635_115	1	Sgeranii	PGPT0003180_4547	1
BCCO_861	PGPT0003040_515	1	Slacri	PGPT0004020_1067	1	Sreticuliscabiei	PGPT0003720_785	1	Sturgidiscabies	PGPT0003650_41	1	Sgeranii	PGPT0003180_6383	1
BCCO_861	PGPT0003040_811	1	Slacri	PGPT0004020_18	2	Sreticuliscabiei	PGPT0003760_103	1	Sturgidiscabies	PGPT0003655_1832	1	Sgeranii	PGPT0003180_706	2
BCCO_861	PGPT0003045_1706	1	Slacri	PGPT0004020_334	1	Sreticuliscabiei	PGPT0003760_249	1	Sturgidiscabies	PGPT0003660_1630	1	Sgeranii	PGPT0003180_7091	1
BCCO_861	PGPT0003065_207	1	Slacri	PGPT0004020_5134	1	Sreticuliscabiei	PGPT0003760_3379	1	Sturgidiscabies	PGPT0003660_3106	1	Sgeranii	PGPT0003180_7153	1
BCCO_861	PGPT0003075_2	1	Slacri	PGPT0004020_5985	1	Sreticuliscabiei	PGPT0003760_394	1	Sturgidiscabies	PGPT0003660_3119	1	Sgeranii	PGPT0003180_7367	1
BCCO_861	PGPT0003080_6	2	Slacri	PGPT0004020_868	1	Sreticuliscabiei	PGPT0003760_4363	1	Sturgidiscabies	PGPT0003660_3147	1	Sgeranii	PGPT0003180_7394	1
BCCO_861	PGPT0003085_15	1	Slacri	PGPT0004025_1342	1	Sreticuliscabiei	PGPT0003760_5543	1	Sturgidiscabies	PGPT0003665_169	1	Sgeranii	PGPT0003180_7540	1
BCCO_861	PGPT0003085_2	1	Slacri	PGPT0004025_1382	1	Sreticuliscabiei	PGPT0003760_575	1	Sturgidiscabies	PGPT0003670_110	1	Sgeranii	PGPT0003180_7959	1
BCCO_861	PGPT0003085_20	1	Slacri	PGPT0004025_2336	1	Sreticuliscabiei	PGPT0003760_79	1	Sturgidiscabies	PGPT0003680_1675	1	Sgeranii	PGPT0003180_8040	1
BCCO_861	PGPT0003085_22	1	Slacri	PGPT0004025_3322	1	Sreticuliscabiei	PGPT0003765_11013	1	Sturgidiscabies	PGPT0003690_10	1	Sgeranii	PGPT0003180_8431	1
BCCO_861	PGPT0003116_2	1	Slacri	PGPT0004025_4278	1	Sreticuliscabiei	PGPT0003765_125	1	Sturgidiscabies	PGPT0003690_1702	1	Sgeranii	PGPT0003180_9358	1
BCCO_861	PGPT0003119_1	2	Slacri	PGPT0004030_1985	1	Sreticuliscabiei	PGPT0003765_148	1	Sturgidiscabies	PGPT0003690_1739	1	Sgeranii	PGPT0003180_946	2
BCCO_861	PGPT0003152_1	1	Slacri	PGPT0004035_2690	1	Sreticuliscabiei	PGPT0003765_2771	1	Sturgidiscabies	PGPT0003700_261	1	Sgeranii	PGPT0003180_971	1
BCCO_861	PGPT0003165_1	1	Slacri	PGPT0004055_2326	1	Sreticuliscabiei	PGPT0003765_3083	1	Sturgidiscabies	PGPT0003700_3546	1	Sgeranii	PGPT0003180_987	1
BCCO_861	PGPT0003165_10	1	Slacri	PGPT0004080_17	1	Sreticuliscabiei	PGPT0003765_3603	1	Sturgidiscabies	PGPT0003710_1432	1	Sgeranii	PGPT0003185_886	1
BCCO_861	PGPT0003165_19	1	Slacri	PGPT0004085_1501	1	Sreticuliscabiei	PGPT0003765_4949	1	Sturgidiscabies	PGPT0003710_94	2	Sgeranii	PGPT0003200_1201	1
BCCO_861	PGPT0003165_3	1	Slacri	PGPT0004090_4938	1	Sreticuliscabiei	PGPT0003765_5737	1	Sturgidiscabies	PGPT0003715_395	1	Sgeranii	PGPT0003200_3018	1
BCCO_861	PGPT0003175_16	1	Slacri	PGPT0004090_6052	1	Sreticuliscabiei	PGPT0003770_2785	1	Sturgidiscabies	PGPT0003720_1114	1	Sgeranii	PGPT0003215_107	1
BCCO_861	PGPT0003180_10141	1	Slacri	PGPT0004090_7949	1	Sreticuliscabiei	PGPT0003770_3814	1	Sturgidiscabies	PGPT0003720_114	2	Sgeranii	PGPT0003215_626	1
BCCO_861	PGPT0003180_10310	1	Slacri	PGPT0004095_117	1	Sreticuliscabiei	PGPT0003770_4646	1	Sturgidiscabies	PGPT0003720_57	1	Sgeranii	PGPT0003230_35	1
BCCO_861	PGPT0003180_10490	1	Slacri	PGPT0004095_149	1	Sreticuliscabiei	PGPT0003770_5927	1	Sturgidiscabies	PGPT0003720_785	1	Sgeranii	PGPT0003230_375	1
BCCO_861	PGPT0003180_10517	1	Slacri	PGPT0004095_177	1	Sreticuliscabiei	PGPT0003770_6934	1	Sturgidiscabies	PGPT0003760_103	1	Sgeranii	PGPT0003253_1	1
BCCO_861	PGPT0003180_10523	1	Slacri	PGPT0004100_1757	1	Sreticuliscabiei	PGPT0003770_694	1	Sturgidiscabies	PGPT0003760_111	1	Sgeranii	PGPT0003255_155	1
BCCO_861	PGPT0003180_11335	1	Slacri	PGPT0004100_1780	1	Sreticuliscabiei	PGPT0003770_8785	1	Sturgidiscabies	PGPT0003760_249	1	Sgeranii	PGPT0003255_520	1
BCCO_861	PGPT0003180_11355	1	Slacri	PGPT0004100_1795	1	Sreticuliscabiei	PGPT0003875_1437	1	Sturgidiscabies	PGPT0003760_3379	1	Sgeranii	PGPT0003255_642	1
BCCO_861	PGPT0003180_11584	1	Slacri	PGPT0004100_1881	1	Sreticuliscabiei	PGPT0003880_2038	1	Sturgidiscabies	PGPT0003760_394	1	Sgeranii	PGPT0003255_762	1
BCCO_861	PGPT0003180_12145	1	Slacri	PGPT0004100_2174	1	Sreticuliscabiei	PGPT0003880_4073	1	Sturgidiscabies	PGPT0003760_4363	1	Sgeranii	PGPT0003270_403	1
BCCO_861	PGPT0003180_12219	1	Slacri	PGPT0004100_2596	1	Sreticuliscabiei	PGPT0003890_681	1	Sturgidiscabies	PGPT0003760_5543	1	Sgeranii	PGPT0003290_120	1
BCCO_861	PGPT0003180_12243	1	Slacri	PGPT0004100_2751	1	Sreticuliscabiei	PGPT0003906_116	1	Sturgidiscabies	PGPT0003760_575	1	Sgeranii	PGPT0003290_35	1
BCCO_861	PGPT0003180_12627	1	Slacri	PGPT0004100_2854	1	Sreticuliscabiei	PGPT0003915_7	1	Sturgidiscabies	PGPT0003765_125	1	Sgeranii	PGPT0003290_93	1
BCCO_861	PGPT0003180_13260	1	Slacri	PGPT0004100_3061	1	Sreticuliscabiei	PGPT0003915_950	1	Sturgidiscabies	PGPT0003765_148	1	Sgeranii	PGPT0003310_307	1
BCCO_861	PGPT0003180_13462	1	Slacri	PGPT0004100_3269	1	Sreticuliscabiei	PGPT0003920_2	1	Sturgidiscabies	PGPT0003765_2771	1	Sgeranii	PGPT0003316_3	1
BCCO_861	PGPT0003180_13711	1	Slacri	PGPT0004100_462	1	Sreticuliscabiei	PGPT0003925_382	1	Sturgidiscabies	PGPT0003765_3083	1	Sgeranii	PGPT0003370_499	1
BCCO_861	PGPT0003180_13848	1	Slacri	PGPT0004100_547	1	Sreticuliscabiei	PGPT0003935_2267	1	Sturgidiscabies	PGPT0003765_3603	1	Sgeranii	PGPT0003370_938	1
BCCO_861	PGPT0003180_1481	1	Slacri	PGPT0004100_691	1	Sreticuliscabiei	PGPT0003965_1391	1	Sturgidiscabies	PGPT0003765_4949	1	Sgeranii	PGPT0003370_97	1
BCCO_861	PGPT0003180_15927	1	Slacri	PGPT0004100_880	1	Sreticuliscabiei	PGPT0003975_525	1	Sturgidiscabies	PGPT0003765_5737	1	Sgeranii	PGPT0003375_11	1
BCCO_861	PGPT0003180_17634	1	Slacri	PGPT0004105_1059	1	Sreticuliscabiei	PGPT0003985_1014	1	Sturgidiscabies	PGPT0003770_2785	1	Sgeranii	PGPT0003375_123	1
BCCO_861	PGPT0003180_1815	1	Slacri	PGPT0004105_1307	4	Sreticuliscabiei	PGPT0003985_103	1	Sturgidiscabies	PGPT0003770_3412	1	Sgeranii	PGPT0003390_253	1
BCCO_861	PGPT0003180_18868	1	Slacri	PGPT0004105_1385	1	Sreticuliscabiei	PGPT0003985_1046	1	Sturgidiscabies	PGPT0003770_3814	1	Sgeranii	PGPT0003390_543	1
BCCO_861	PGPT0003180_19109	1	Slacri	PGPT0004105_585	1	Sreticuliscabiei	PGPT0003985_1241	1	Sturgidiscabies	PGPT0003770_4646	1	Sgeranii	PGPT0003395_226	1
BCCO_861	PGPT0003180_19360	1	Slacri	PGPT0004105_64	1	Sreticuliscabiei	PGPT0003985_187	1	Sturgidiscabies	PGPT0003770_5927	1	Sgeranii	PGPT0003420_86	1
BCCO_861	PGPT0003180_19451	1	Slacri	PGPT0004125_2091	1	Sreticuliscabiei	PGPT0003985_43	1	Sturgidiscabies	PGPT0003770_6934	1	Sgeranii	PGPT0003440_270	1
BCCO_861	PGPT0003180_1973	1	Slacri	PGPT0004135_104	1	Sreticuliscabiei	PGPT0003985_844	1	Sturgidiscabies	PGPT0003770_694	1	Sgeranii	PGPT0003440_8	1
BCCO_861	PGPT0003180_21248	1	Slacri	PGPT0004135_1177	1	Sreticuliscabiei	PGPT0003985_9	1	Sturgidiscabies	PGPT0003770_8785	1	Sgeranii	PGPT0003450_79	1
BCCO_861	PGPT0003180_22221	1	Slacri	PGPT0004135_1506	1	Sreticuliscabiei	PGPT0003985_966	1	Sturgidiscabies	PGPT0003875_1437	1	Sgeranii	PGPT0003470_10	1
BCCO_861	PGPT0003180_22289	1	Slacri	PGPT0004135_1520	1	Sreticuliscabiei	PGPT0004005_11	1	Sturgidiscabies	PGPT0003880_2038	1	Sgeranii	PGPT0003470_113	1
BCCO_861	PGPT0003180_22805	1	Slacri	PGPT0004135_399	1	Sreticuliscabiei	PGPT0004005_12	1	Sturgidiscabies	PGPT0003880_4073	1	Sgeranii	PGPT0003470_92	1
BCCO_861	PGPT0003180_23088	1	Slacri	PGPT0004135_475	1	Sreticuliscabiei	PGPT0004005_199	1	Sturgidiscabies	PGPT0003890_681	1	Sgeranii	PGPT0003535_16	1
BCCO_861	PGPT0003180_2522	1	Slacri	PGPT0004135_628	1	Sreticuliscabiei	PGPT0004005_4	1	Sturgidiscabies	PGPT0003906_116	1	Sgeranii	PGPT0003580_568	1
BCCO_861	PGPT0003180_2702	1	Slacri	PGPT0004135_9	1	Sreticuliscabiei	PGPT0004005_53	1	Sturgidiscabies	PGPT0003915_7	1	Sgeranii	PGPT0003605_12	1
BCCO_861	PGPT0003180_2803	2	Slacri	PGPT0004136_283	1	Sreticuliscabiei	PGPT0004015_131	1	Sturgidiscabies	PGPT0003915_950	1	Sgeranii	PGPT0003605_41	1
BCCO_861	PGPT0003180_3357	1	Slacri	PGPT0004136_363	1	Sreticuliscabiei	PGPT0004020_1009	1	Sturgidiscabies	PGPT0003920_2	1	Sgeranii	PGPT0003615_82	1
BCCO_861	PGPT0003180_3757	1	Slacri	PGPT0004150_100	1	Sreticuliscabiei	PGPT0004020_1067	1	Sturgidiscabies	PGPT0003925_382	1	Sgeranii	PGPT0003625_776	1
BCCO_861	PGPT0003180_4892	1	Slacri	PGPT0004154_1	1	Sreticuliscabiei	PGPT0004020_18	2	Sturgidiscabies	PGPT0003935_2267	1	Sgeranii	PGPT0003625_851	1
BCCO_861	PGPT0003180_5010	1	Slacri	PGPT0004175_1363	1	Sreticuliscabiei	PGPT0004020_313	1	Sturgidiscabies	PGPT0003965_1391	1	Sgeranii	PGPT0003635_131	1
BCCO_861	PGPT0003180_5840	1	Slacri	PGPT0004175_173	1	Sreticuliscabiei	PGPT0004020_334	1	Sturgidiscabies	PGPT0003975_525	1	Sgeranii	PGPT0003635_94	1
BCCO_861	PGPT0003180_706	1	Slacri	PGPT0004190_2107	1	Sreticuliscabiei	PGPT0004020_5134	1	Sturgidiscabies	PGPT0003985_1014	1	Sgeranii	PGPT0003640_813	1
BCCO_861	PGPT0003180_7168	1	Slacri	PGPT0004195_1143	1	Sreticuliscabiei	PGPT0004020_5317	1	Sturgidiscabies	PGPT0003985_103	1	Sgeranii	PGPT0003650_41	1
BCCO_861	PGPT0003180_7367	1	Slacri	PGPT0004215_131	1	Sreticuliscabiei	PGPT0004020_5697	1	Sturgidiscabies	PGPT0003985_1046	1	Sgeranii	PGPT0003655_2519	1
BCCO_861	PGPT0003180_8213	1	Slacri	PGPT0004220_1412	1	Sreticuliscabiei	PGPT0004025_1355	1	Sturgidiscabies	PGPT0003985_1241	1	Sgeranii	PGPT0003660_1701	1
BCCO_861	PGPT0003180_8303	1	Slacri	PGPT0004225_259	1	Sreticuliscabiei	PGPT0004030_1985	1	Sturgidiscabies	PGPT0003985_187	1	Sgeranii	PGPT0003660_3132	1
BCCO_861	PGPT0003180_8999	1	Slacri	PGPT0004230_1081	1	Sreticuliscabiei	PGPT0004035_2752	1	Sturgidiscabies	PGPT0003985_43	1	Sgeranii	PGPT0003665_146	1
BCCO_861	PGPT0003180_9164	1	Slacri	PGPT0004250_2707	1	Sreticuliscabiei	PGPT0004055_2129	1	Sturgidiscabies	PGPT0003985_844	1	Sgeranii	PGPT0003670_113	1
BCCO_861	PGPT0003180_946	2	Slacri	PGPT0004255_1370	1	Sreticuliscabiei	PGPT0004080_1671	1	Sturgidiscabies	PGPT0003985_9	1	Sgeranii	PGPT0003680_1675	1
BCCO_861	PGPT0003180_9560	1	Slacri	PGPT0004255_1574	1	Sreticuliscabiei	PGPT0004085_1488	1	Sturgidiscabies	PGPT0003985_966	1	Sgeranii	PGPT0003690_1741	1
BCCO_861	PGPT0003180_9588	1	Slacri	PGPT0004255_391	1	Sreticuliscabiei	PGPT0004090_5834	1	Sturgidiscabies	PGPT0004005_11	1	Sgeranii	PGPT0003700_261	1
BCCO_861	PGPT0003180_9659	1	Slacri	PGPT0004265_208	1	Sreticuliscabiei	PGPT0004090_6052	1	Sturgidiscabies	PGPT0004005_12	1	Sgeranii	PGPT0003710_1414	1
BCCO_861	PGPT0003180_987	1	Slacri	PGPT0004270_351	1	Sreticuliscabiei	PGPT0004095_162	1	Sturgidiscabies	PGPT0004005_199	1	Sgeranii	PGPT0003715_395	1
BCCO_861	PGPT0003200_1201	2	Slacri	PGPT0004275_745	1	Sreticuliscabiei	PGPT0004095_177	1	Sturgidiscabies	PGPT0004005_38	1	Sgeranii	PGPT0003720_1114	1
BCCO_861	PGPT0003200_3018	1	Slacri	PGPT0004300_98	1	Sreticuliscabiei	PGPT0004095_508	1	Sturgidiscabies	PGPT0004005_4	1	Sgeranii	PGPT0003720_562	1
BCCO_861	PGPT0003215_107	1	Slacri	PGPT0004400_74	1	Sreticuliscabiei	PGPT0004100_1780	1	Sturgidiscabies	PGPT0004005_53	1	Sgeranii	PGPT0003720_57	1
BCCO_861	PGPT0003215_626	1	Slacri	PGPT0004430_11	13	Sreticuliscabiei	PGPT0004100_2527	1	Sturgidiscabies	PGPT0004015_131	1	Sgeranii	PGPT0003725_3095	2
BCCO_861	PGPT0003230_101	1	Slacri	PGPT0004430_12443	1	Sreticuliscabiei	PGPT0004100_2596	1	Sturgidiscabies	PGPT0004020_1009	1	Sgeranii	PGPT0003760_103	2
BCCO_861	PGPT0003230_379	1	Slacri	PGPT0004430_12447	1	Sreticuliscabiei	PGPT0004100_2854	1	Sturgidiscabies	PGPT0004020_1067	1	Sgeranii	PGPT0003760_2206	1
BCCO_861	PGPT0003230_385	1	Slacri	PGPT0004430_14098	1	Sreticuliscabiei	PGPT0004100_3109	1	Sturgidiscabies	PGPT0004020_18	2	Sgeranii	PGPT0003760_249	1
BCCO_861	PGPT0003230_390	1	Slacri	PGPT0004430_17949	1	Sreticuliscabiei	PGPT0004100_3306	1	Sturgidiscabies	PGPT0004020_313	1	Sgeranii	PGPT0003760_3379	1
BCCO_861	PGPT0003253_1	2	Slacri	PGPT0004430_1827	1	Sreticuliscabiei	PGPT0004100_4104	1	Sturgidiscabies	PGPT0004020_334	1	Sgeranii	PGPT0003760_3662	1
BCCO_861	PGPT0003255_654	1	Slacri	PGPT0004430_2220	1	Sreticuliscabiei	PGPT0004100_4254	1	Sturgidiscabies	PGPT0004020_5134	1	Sgeranii	PGPT0003760_4363	1
BCCO_861	PGPT0003255_753	1	Slacri	PGPT0004430_2410	1	Sreticuliscabiei	PGPT0004100_466	1	Sturgidiscabies	PGPT0004020_5317	1	Sgeranii	PGPT0003760_469	1
BCCO_861	PGPT0003255_762	1	Slacri	PGPT0004430_346	1	Sreticuliscabiei	PGPT0004100_547	2	Sturgidiscabies	PGPT0004020_5697	1	Sgeranii	PGPT0003760_5529	1
BCCO_861	PGPT0003255_86	1	Slacri	PGPT0004430_45	2	Sreticuliscabiei	PGPT0004100_691	1	Sturgidiscabies	PGPT0004025_1355	1	Sgeranii	PGPT0003760_575	1
BCCO_861	PGPT0003290_97	1	Slacri	PGPT0004430_7607	1	Sreticuliscabiei	PGPT0004100_93	1	Sturgidiscabies	PGPT0004030_1985	1	Sgeranii	PGPT0003760_9192	1
BCCO_861	PGPT0003310_307	1	Slacri	PGPT0004430_9764	1	Sreticuliscabiei	PGPT0004105_1043	1	Sturgidiscabies	PGPT0004035_2752	1	Sgeranii	PGPT0003765_2771	1
BCCO_861	PGPT0003335_47	1	Slacri	PGPT0004435_3072	1	Sreticuliscabiei	PGPT0004105_1307	2	Sturgidiscabies	PGPT0004055_2129	1	Sgeranii	PGPT0003765_3499	1
BCCO_861	PGPT0003360_112	1	Slacri	PGPT0004435_5853	1	Sreticuliscabiei	PGPT0004105_1385	1	Sturgidiscabies	PGPT0004080_1671	1	Sgeranii	PGPT0003765_3603	1
BCCO_861	PGPT0003360_8	1	Slacri	PGPT0004435_6131	1	Sreticuliscabiei	PGPT0004105_1478	2	Sturgidiscabies	PGPT0004085_1501	1	Sgeranii	PGPT0003765_3801	1
BCCO_861	PGPT0003370_110	1	Slacri	PGPT0004435_6957	1	Sreticuliscabiei	PGPT0004105_585	1	Sturgidiscabies	PGPT0004090_5834	1	Sgeranii	PGPT0003765_4989	1
BCCO_861	PGPT0003370_795	1	Slacri	PGPT0004435_7304	1	Sreticuliscabiei	PGPT0004106_172	1	Sturgidiscabies	PGPT0004090_6052	1	Sgeranii	PGPT0003765_5737	1
BCCO_861	PGPT0003375_11	1	Slacri	PGPT0004435_7695	1	Sreticuliscabiei	PGPT0004125_2091	1	Sturgidiscabies	PGPT0004095_162	2	Sgeranii	PGPT0003765_6914	1
BCCO_861	PGPT0003390_253	1	Slacri	PGPT0004435_830	1	Sreticuliscabiei	PGPT0004130_399	1	Sturgidiscabies	PGPT0004095_177	1	Sgeranii	PGPT0003765_77	1
BCCO_861	PGPT0003395_300	1	Slacri	PGPT0004435_8313	1	Sreticuliscabiei	PGPT0004135_104	1	Sturgidiscabies	PGPT0004095_508	1	Sgeranii	PGPT0003765_9150	1
BCCO_861	PGPT0003395_340	1	Slacri	PGPT0004440_6104	1	Sreticuliscabiei	PGPT0004135_325	1	Sturgidiscabies	PGPT0004100_1145	1	Sgeranii	PGPT0003765_9814	1
BCCO_861	PGPT0003420_86	1	Slacri	PGPT0004440_6338	1	Sreticuliscabiei	PGPT0004135_958	1	Sturgidiscabies	PGPT0004100_1780	1	Sgeranii	PGPT0003770_19	1
BCCO_861	PGPT0003440_251	1	Slacri	PGPT0004440_6400	1	Sreticuliscabiei	PGPT0004136_370	1	Sturgidiscabies	PGPT0004100_1881	1	Sgeranii	PGPT0003770_2785	1
BCCO_861	PGPT0003440_270	1	Slacri	PGPT0004445_10030	1	Sreticuliscabiei	PGPT0004147_1	1	Sturgidiscabies	PGPT0004100_2596	1	Sgeranii	PGPT0003770_3412	1
BCCO_861	PGPT0003440_5	1	Slacri	PGPT0004445_1323	1	Sreticuliscabiei	PGPT0004148_1	1	Sturgidiscabies	PGPT0004100_2751	1	Sgeranii	PGPT0003770_3814	1
BCCO_861	PGPT0003470_17	1	Slacri	PGPT0004445_1806	1	Sreticuliscabiei	PGPT0004150_100	1	Sturgidiscabies	PGPT0004100_2854	1	Sgeranii	PGPT0003770_4646	1
BCCO_861	PGPT0003470_35	1	Slacri	PGPT0004445_35	1	Sreticuliscabiei	PGPT0004151_1	2	Sturgidiscabies	PGPT0004100_3109	1	Sgeranii	PGPT0003770_4938	1
BCCO_861	PGPT0003470_38	1	Slacri	PGPT0004445_4539	1	Sreticuliscabiei	PGPT0004175_1363	1	Sturgidiscabies	PGPT0004100_3306	1	Sgeranii	PGPT0003770_5927	1
BCCO_861	PGPT0003535_16	2	Slacri	PGPT0004445_5788	1	Sreticuliscabiei	PGPT0004175_210	1	Sturgidiscabies	PGPT0004100_4067	1	Sgeranii	PGPT0003770_694	1
BCCO_861	PGPT0003535_17	1	Slacri	PGPT0004445_8443	1	Sreticuliscabiei	PGPT0004175_4	1	Sturgidiscabies	PGPT0004100_4254	1	Sgeranii	PGPT0003770_8179	1
BCCO_861	PGPT0003545_8	1	Slacri	PGPT0004450_13985	1	Sreticuliscabiei	PGPT0004190_2107	1	Sturgidiscabies	PGPT0004100_462	1	Sgeranii	PGPT0003770_8733	1
BCCO_861	PGPT0003580_502	1	Slacri	PGPT0004450_3047	1	Sreticuliscabiei	PGPT0004195_1143	1	Sturgidiscabies	PGPT0004100_5257	1	Sgeranii	PGPT0003770_9519	1
BCCO_861	PGPT0003580_571	1	Slacri	PGPT0004450_4257	1	Sreticuliscabiei	PGPT0004200_4591	1	Sturgidiscabies	PGPT0004100_547	2	Sgeranii	PGPT0003770_9990	1
BCCO_861	PGPT0003580_853	1	Slacri	PGPT0004450_5537	1	Sreticuliscabiei	PGPT0004220_1412	1	Sturgidiscabies	PGPT0004100_93	1	Sgeranii	PGPT0003880_2841	1
BCCO_861	PGPT0003605_12	1	Slacri	PGPT0004455_599	1	Sreticuliscabiei	PGPT0004225_259	1	Sturgidiscabies	PGPT0004105_1043	1	Sgeranii	PGPT0003880_4073	1
BCCO_861	PGPT0003605_41	1	Slacri	PGPT0004455_668	1	Sreticuliscabiei	PGPT0004230_1081	1	Sturgidiscabies	PGPT0004105_1307	3	Sgeranii	PGPT0003890_681	1
BCCO_861	PGPT0003615_82	1	Slacri	PGPT0004455_909	1	Sreticuliscabiei	PGPT0004250_2194	1	Sturgidiscabies	PGPT0004105_1385	1	Sgeranii	PGPT0003907_29	1
BCCO_861	PGPT0003625_779	1	Slacri	PGPT0004460_42	1	Sreticuliscabiei	PGPT0004250_2758	1	Sturgidiscabies	PGPT0004105_1478	1	Sgeranii	PGPT0003915_110	2
BCCO_861	PGPT0003630_236	1	Slacri	PGPT0004470_879	1	Sreticuliscabiei	PGPT0004255_1579	1	Sturgidiscabies	PGPT0004105_585	1	Sgeranii	PGPT0003915_1211	1
BCCO_861	PGPT0003635_115	1	Slacri	PGPT0004495_25	1	Sreticuliscabiei	PGPT0004255_3389	1	Sturgidiscabies	PGPT0004106_172	1	Sgeranii	PGPT0003915_1513	1
BCCO_861	PGPT0003650_41	1	Slacri	PGPT0004545_149	1	Sreticuliscabiei	PGPT0004265_271	1	Sturgidiscabies	PGPT0004125_2091	1	Sgeranii	PGPT0003915_37	1
BCCO_861	PGPT0003655_4168	1	Slacri	PGPT0004550_25	1	Sreticuliscabiei	PGPT0004270_351	1	Sturgidiscabies	PGPT0004130_399	1	Sgeranii	PGPT0003915_881	1
BCCO_861	PGPT0003655_4860	1	Slacri	PGPT0004555_114	1	Sreticuliscabiei	PGPT0004275_745	1	Sturgidiscabies	PGPT0004135_104	1	Sgeranii	PGPT0003920_2	1
BCCO_861	PGPT0003660_1630	1	Slacri	PGPT0004575_124	1	Sreticuliscabiei	PGPT0004300_98	1	Sturgidiscabies	PGPT0004135_325	1	Sgeranii	PGPT0003925_382	1
BCCO_861	PGPT0003660_3147	1	Slacri	PGPT0004575_253	1	Sreticuliscabiei	PGPT0004370_3	1	Sturgidiscabies	PGPT0004135_958	1	Sgeranii	PGPT0003935_2494	1
BCCO_861	PGPT0003665_184	1	Slacri	PGPT0004575_257	1	Sreticuliscabiei	PGPT0004390_486	1	Sturgidiscabies	PGPT0004136_370	1	Sgeranii	PGPT0003965_1391	1
BCCO_861	PGPT0003670_110	1	Slacri	PGPT0004575_434	1	Sreticuliscabiei	PGPT0004430_11	14	Sturgidiscabies	PGPT0004147_1	1	Sgeranii	PGPT0003975_525	1
BCCO_861	PGPT0003680_1146	1	Slacri	PGPT0004580_404	1	Sreticuliscabiei	PGPT0004430_12443	1	Sturgidiscabies	PGPT0004150_100	1	Sgeranii	PGPT0003985_1046	1
BCCO_861	PGPT0003680_1472	1	Slacri	PGPT0004585_76	1	Sreticuliscabiei	PGPT0004430_12511	1	Sturgidiscabies	PGPT0004151_1	2	Sgeranii	PGPT0003985_187	1
BCCO_861	PGPT0003680_1725	1	Slacri	PGPT0004590_923	1	Sreticuliscabiei	PGPT0004430_12618	1	Sturgidiscabies	PGPT0004175_1363	1	Sgeranii	PGPT0003985_214	1
BCCO_861	PGPT0003680_5589	1	Slacri	PGPT0004595_317	1	Sreticuliscabiei	PGPT0004430_14098	1	Sturgidiscabies	PGPT0004175_1405	1	Sgeranii	PGPT0003985_43	1
BCCO_861	PGPT0003690_1702	1	Slacri	PGPT0004595_64	1	Sreticuliscabiei	PGPT0004430_14477	1	Sturgidiscabies	PGPT0004175_210	1	Sgeranii	PGPT0003985_9	1
BCCO_861	PGPT0003710_1414	1	Slacri	PGPT0004605_133	1	Sreticuliscabiei	PGPT0004430_14904	1	Sturgidiscabies	PGPT0004175_4	1	Sgeranii	PGPT0004005_11	1
BCCO_861	PGPT0003715_395	1	Slacri	PGPT0004610_240	1	Sreticuliscabiei	PGPT0004430_16098	1	Sturgidiscabies	PGPT0004190_2107	1	Sgeranii	PGPT0004005_12	1
BCCO_861	PGPT0003720_1114	1	Slacri	PGPT0004615_232	1	Sreticuliscabiei	PGPT0004430_16837	1	Sturgidiscabies	PGPT0004195_1143	1	Sgeranii	PGPT0004005_18	1
BCCO_861	PGPT0003720_339	1	Slacri	PGPT0004625_222	1	Sreticuliscabiei	PGPT0004430_18180	1	Sturgidiscabies	PGPT0004200_4591	1	Sgeranii	PGPT0004005_199	1
BCCO_861	PGPT0003720_57	1	Slacri	PGPT0004640_606	1	Sreticuliscabiei	PGPT0004430_2329	1	Sturgidiscabies	PGPT0004220_1412	1	Sgeranii	PGPT0004005_34	1
BCCO_861	PGPT0003725_1190	1	Slacri	PGPT0004645_1619	1	Sreticuliscabiei	PGPT0004430_2410	1	Sturgidiscabies	PGPT0004225_259	1	Sgeranii	PGPT0004005_38	1
BCCO_861	PGPT0003725_1634	1	Slacri	PGPT0004660_1002	1	Sreticuliscabiei	PGPT0004430_2809	1	Sturgidiscabies	PGPT0004230_1081	1	Sgeranii	PGPT0004005_4	1
BCCO_861	PGPT0003725_3466	1	Slacri	PGPT0004690_629	1	Sreticuliscabiei	PGPT0004430_346	1	Sturgidiscabies	PGPT0004250_2194	1	Sgeranii	PGPT0004005_53	1
BCCO_861	PGPT0003730_4271	1	Slacri	PGPT0004695_1371	1	Sreticuliscabiei	PGPT0004430_3935	1	Sturgidiscabies	PGPT0004250_2758	1	Sgeranii	PGPT0004015_131	1
BCCO_861	PGPT0003735_2225	1	Slacri	PGPT0004700_1245	1	Sreticuliscabiei	PGPT0004430_45	2	Sturgidiscabies	PGPT0004255_1579	1	Sgeranii	PGPT0004020_1067	1
BCCO_861	PGPT0003760_105	1	Slacri	PGPT0004700_2177	1	Sreticuliscabiei	PGPT0004430_7606	1	Sturgidiscabies	PGPT0004255_3389	1	Sgeranii	PGPT0004020_1564	1
BCCO_861	PGPT0003760_242	1	Slacri	PGPT0004700_2251	1	Sreticuliscabiei	PGPT0004430_9764	1	Sturgidiscabies	PGPT0004265_271	1	Sgeranii	PGPT0004020_18	2
BCCO_861	PGPT0003760_249	1	Slacri	PGPT0004705_2602	1	Sreticuliscabiei	PGPT0004435_1007	1	Sturgidiscabies	PGPT0004270_351	1	Sgeranii	PGPT0004020_334	1
BCCO_861	PGPT0003760_2672	1	Slacri	PGPT0004705_38	1	Sreticuliscabiei	PGPT0004435_1473	1	Sturgidiscabies	PGPT0004275_745	1	Sgeranii	PGPT0004020_5003	1
BCCO_861	PGPT0003760_2859	1	Slacri	PGPT0004705_506	1	Sreticuliscabiei	PGPT0004435_4542	1	Sturgidiscabies	PGPT0004300_98	1	Sgeranii	PGPT0004020_5134	1
BCCO_861	PGPT0003760_3379	1	Slacri	PGPT0004710_1653	1	Sreticuliscabiei	PGPT0004435_4962	1	Sturgidiscabies	PGPT0004370_3	1	Sgeranii	PGPT0004020_5236	1
BCCO_861	PGPT0003760_3772	1	Slacri	PGPT0004715_203	1	Sreticuliscabiei	PGPT0004435_5055	1	Sturgidiscabies	PGPT0004390_486	1	Sgeranii	PGPT0004020_5317	1
BCCO_861	PGPT0003760_5543	1	Slacri	PGPT0004715_2794	2	Sreticuliscabiei	PGPT0004435_6948	1	Sturgidiscabies	PGPT0004430_11	13	Sgeranii	PGPT0004020_5670	1
BCCO_861	PGPT0003760_575	1	Slacri	PGPT0004720_1497	1	Sreticuliscabiei	PGPT0004435_7304	1	Sturgidiscabies	PGPT0004430_12443	1	Sgeranii	PGPT0004020_868	1
BCCO_861	PGPT0003760_9192	1	Slacri	PGPT0004735_1236	1	Sreticuliscabiei	PGPT0004435_7695	1	Sturgidiscabies	PGPT0004430_12511	1	Sgeranii	PGPT0004030_3549	1
BCCO_861	PGPT0003765_10518	1	Slacri	PGPT0004735_2776	1	Sreticuliscabiei	PGPT0004435_790	1	Sturgidiscabies	PGPT0004430_12618	1	Sgeranii	PGPT0004045_25	1
BCCO_861	PGPT0003765_125	1	Slacri	PGPT0004735_3134	1	Sreticuliscabiei	PGPT0004435_8057	1	Sturgidiscabies	PGPT0004430_14098	1	Sgeranii	PGPT0004055_2361	1
BCCO_861	PGPT0003765_148	1	Slacri	PGPT0004735_4781	1	Sreticuliscabiei	PGPT0004440_5711	1	Sturgidiscabies	PGPT0004430_14477	1	Sgeranii	PGPT0004080_17	1
BCCO_861	PGPT0003765_2771	1	Slacri	PGPT0004735_4798	1	Sreticuliscabiei	PGPT0004440_6338	1	Sturgidiscabies	PGPT0004430_14904	1	Sgeranii	PGPT0004085_1501	1
BCCO_861	PGPT0003765_2896	1	Slacri	PGPT0004735_5072	1	Sreticuliscabiei	PGPT0004440_6400	1	Sturgidiscabies	PGPT0004430_16098	1	Sgeranii	PGPT0004090_561	1
BCCO_861	PGPT0003765_3336	1	Slacri	PGPT0004735_5148	1	Sreticuliscabiei	PGPT0004440_7580	1	Sturgidiscabies	PGPT0004430_16837	1	Sgeranii	PGPT0004090_6052	1
BCCO_861	PGPT0003765_3603	1	Slacri	PGPT0004735_5170	1	Sreticuliscabiei	PGPT0004445_10030	1	Sturgidiscabies	PGPT0004430_17949	1	Sgeranii	PGPT0004090_6195	1
BCCO_861	PGPT0003765_3909	1	Slacri	PGPT0004735_738	1	Sreticuliscabiei	PGPT0004445_12488	1	Sturgidiscabies	PGPT0004430_2329	1	Sgeranii	PGPT0004090_7949	1
BCCO_861	PGPT0003765_4804	1	Slacri	PGPT0004735_774	1	Sreticuliscabiei	PGPT0004445_12841	1	Sturgidiscabies	PGPT0004430_2410	1	Sgeranii	PGPT0004095_149	1
BCCO_861	PGPT0003765_6464	1	Slacri	PGPT0004735_877	1	Sreticuliscabiei	PGPT0004445_2165	1	Sturgidiscabies	PGPT0004430_2809	1	Sgeranii	PGPT0004095_162	1
BCCO_861	PGPT0003765_9569	1	Slacri	PGPT0004750_1257	1	Sreticuliscabiei	PGPT0004445_36	1	Sturgidiscabies	PGPT0004430_30	1	Sgeranii	PGPT0004095_177	1
BCCO_861	PGPT0003770_2785	1	Slacri	PGPT0004750_1261	1	Sreticuliscabiei	PGPT0004445_3631	1	Sturgidiscabies	PGPT0004430_346	1	Sgeranii	PGPT0004100_1043	1
BCCO_861	PGPT0003770_3412	1	Slacri	PGPT0004760_1063	1	Sreticuliscabiei	PGPT0004445_4948	1	Sturgidiscabies	PGPT0004430_3935	1	Sgeranii	PGPT0004100_1145	1
BCCO_861	PGPT0003770_3814	1	Slacri	PGPT0004760_2056	1	Sreticuliscabiei	PGPT0004445_5788	1	Sturgidiscabies	PGPT0004430_45	2	Sgeranii	PGPT0004100_1164	1
BCCO_861	PGPT0003770_3947	1	Slacri	PGPT0004770_886	1	Sreticuliscabiei	PGPT0004445_6603	1	Sturgidiscabies	PGPT0004430_7606	1	Sgeranii	PGPT0004100_1757	1
BCCO_861	PGPT0003770_4713	1	Slacri	PGPT0004795_171	1	Sreticuliscabiei	PGPT0004445_68	1	Sturgidiscabies	PGPT0004430_9764	1	Sgeranii	PGPT0004100_1780	1
BCCO_861	PGPT0003770_504	1	Slacri	PGPT0004825_318	1	Sreticuliscabiei	PGPT0004445_8881	1	Sturgidiscabies	PGPT0004435_1007	1	Sgeranii	PGPT0004100_1795	1
BCCO_861	PGPT0003770_5927	1	Slacri	PGPT0004890_2912	1	Sreticuliscabiei	PGPT0004450_2876	1	Sturgidiscabies	PGPT0004435_1210	1	Sgeranii	PGPT0004100_2494	1
BCCO_861	PGPT0003770_681	1	Slacri	PGPT0004890_3043	1	Sreticuliscabiei	PGPT0004450_2931	1	Sturgidiscabies	PGPT0004435_1473	1	Sgeranii	PGPT0004100_2527	1
BCCO_861	PGPT0003770_7738	1	Slacri	PGPT0004890_32	1	Sreticuliscabiei	PGPT0004450_3310	1	Sturgidiscabies	PGPT0004435_4542	1	Sgeranii	PGPT0004100_2654	1
BCCO_861	PGPT0003770_8240	1	Slacri	PGPT0004890_735	1	Sreticuliscabiei	PGPT0004450_3355	1	Sturgidiscabies	PGPT0004435_4962	1	Sgeranii	PGPT0004100_2751	1
BCCO_861	PGPT0003770_8785	1	Slacri	PGPT0004890_746	1	Sreticuliscabiei	PGPT0004450_9252	1	Sturgidiscabies	PGPT0004435_5055	1	Sgeranii	PGPT0004100_2854	2
BCCO_861	PGPT0003770_8909	1	Slacri	PGPT0004895_127	1	Sreticuliscabiei	PGPT0004455_333	1	Sturgidiscabies	PGPT0004435_5174	1	Sgeranii	PGPT0004100_3061	1
BCCO_861	PGPT0003770_8940	1	Slacri	PGPT0004895_193	1	Sreticuliscabiei	PGPT0004455_909	1	Sturgidiscabies	PGPT0004435_6948	1	Sgeranii	PGPT0004100_3109	1
BCCO_861	PGPT0003770_964	1	Slacri	PGPT0004895_234	1	Sreticuliscabiei	PGPT0004460_90	1	Sturgidiscabies	PGPT0004435_7304	1	Sgeranii	PGPT0004100_462	1
BCCO_861	PGPT0003770_9732	1	Slacri	PGPT0004895_282	1	Sreticuliscabiei	PGPT0004470_879	1	Sturgidiscabies	PGPT0004435_7695	1	Sgeranii	PGPT0004100_547	1
BCCO_861	PGPT0003825_235	1	Slacri	PGPT0004895_286	1	Sreticuliscabiei	PGPT0004495_2	1	Sturgidiscabies	PGPT0004435_790	1	Sgeranii	PGPT0004105_1059	1
BCCO_861	PGPT0003830_251	1	Slacri	PGPT0004895_358	1	Sreticuliscabiei	PGPT0004545_271	1	Sturgidiscabies	PGPT0004440_5711	1	Sgeranii	PGPT0004105_1307	4
BCCO_861	PGPT0003880_1109	1	Slacri	PGPT0004895_76	1	Sreticuliscabiei	PGPT0004550_25	1	Sturgidiscabies	PGPT0004440_6338	1	Sgeranii	PGPT0004105_1385	1
BCCO_861	PGPT0003880_1792	1	Slacri	PGPT0004900_87	1	Sreticuliscabiei	PGPT0004575_124	1	Sturgidiscabies	PGPT0004440_6400	1	Sgeranii	PGPT0004105_495	1
BCCO_861	PGPT0003880_4073	1	Slacri	PGPT0004905_1156	1	Sreticuliscabiei	PGPT0004575_253	1	Sturgidiscabies	PGPT0004440_7580	1	Sgeranii	PGPT0004105_525	1
BCCO_861	PGPT0003890_681	1	Slacri	PGPT0004905_1294	1	Sreticuliscabiei	PGPT0004575_257	1	Sturgidiscabies	PGPT0004445_10030	1	Sgeranii	PGPT0004105_585	1
BCCO_861	PGPT0003906_48	1	Slacri	PGPT0004905_1843	1	Sreticuliscabiei	PGPT0004575_434	1	Sturgidiscabies	PGPT0004445_12488	1	Sgeranii	PGPT0004105_873	1
BCCO_861	PGPT0003907_3	1	Slacri	PGPT0004910_1377	2	Sreticuliscabiei	PGPT0004580_404	1	Sturgidiscabies	PGPT0004445_12841	1	Sgeranii	PGPT0004106_172	1
BCCO_861	PGPT0003907_5	1	Slacri	PGPT0004910_612	1	Sreticuliscabiei	PGPT0004590_923	1	Sturgidiscabies	PGPT0004445_2165	1	Sgeranii	PGPT0004125_1561	1
BCCO_861	PGPT0003915_1513	1	Slacri	PGPT0004910_867	1	Sreticuliscabiei	PGPT0004595_12	1	Sturgidiscabies	PGPT0004445_36	1	Sgeranii	PGPT0004130_399	1
BCCO_861	PGPT0003920_176	1	Slacri	PGPT0004910_887	1	Sreticuliscabiei	PGPT0004595_357	1	Sturgidiscabies	PGPT0004445_3631	1	Sgeranii	PGPT0004135_104	1
BCCO_861	PGPT0003920_2	1	Slacri	PGPT0004915_330	1	Sreticuliscabiei	PGPT0004595_44	1	Sturgidiscabies	PGPT0004445_4948	1	Sgeranii	PGPT0004135_1363	1
BCCO_861	PGPT0003925_304	1	Slacri	PGPT0004925_620	1	Sreticuliscabiei	PGPT0004605_1355	1	Sturgidiscabies	PGPT0004445_5788	1	Sgeranii	PGPT0004135_1756	1
BCCO_861	PGPT0003935_2431	1	Slacri	PGPT0004960_1921	1	Sreticuliscabiei	PGPT0004605_465	1	Sturgidiscabies	PGPT0004445_6603	1	Sgeranii	PGPT0004135_325	1
BCCO_861	PGPT0003965_1416	1	Slacri	PGPT0004980_1145	1	Sreticuliscabiei	PGPT0004610_240	1	Sturgidiscabies	PGPT0004445_68	1	Sgeranii	PGPT0004150_100	1
BCCO_861	PGPT0003975_525	1	Slacri	PGPT0004985_5108	1	Sreticuliscabiei	PGPT0004615_664	1	Sturgidiscabies	PGPT0004445_8881	1	Sgeranii	PGPT0004150_60	1
BCCO_861	PGPT0003985_1014	1	Slacri	PGPT0004985_661	1	Sreticuliscabiei	PGPT0004625_229	1	Sturgidiscabies	PGPT0004450_2876	1	Sgeranii	PGPT0004151_1	3
BCCO_861	PGPT0003985_111	1	Slacri	PGPT0004995_1025	1	Sreticuliscabiei	PGPT0004640_606	1	Sturgidiscabies	PGPT0004450_2931	1	Sgeranii	PGPT0004175_1363	1
BCCO_861	PGPT0003985_1127	1	Slacri	PGPT0004995_1036	1	Sreticuliscabiei	PGPT0004645_1600	1	Sturgidiscabies	PGPT0004450_3310	1	Sgeranii	PGPT0004175_460	1
BCCO_861	PGPT0003985_194	1	Slacri	PGPT0004995_1226	1	Sreticuliscabiei	PGPT0004650_145	1	Sturgidiscabies	PGPT0004450_3355	1	Sgeranii	PGPT0004190_2107	1
BCCO_861	PGPT0003985_202	1	Slacri	PGPT0004995_1240	1	Sreticuliscabiei	PGPT0004660_1002	1	Sturgidiscabies	PGPT0004450_9252	1	Sgeranii	PGPT0004195_1143	1
BCCO_861	PGPT0003985_29	1	Slacri	PGPT0004995_1254	1	Sreticuliscabiei	PGPT0004690_629	1	Sturgidiscabies	PGPT0004455_909	1	Sgeranii	PGPT0004195_1326	1
BCCO_861	PGPT0003985_43	1	Slacri	PGPT0004995_1387	1	Sreticuliscabiei	PGPT0004695_1371	1	Sturgidiscabies	PGPT0004460_63	1	Sgeranii	PGPT0004220_1328	1
BCCO_861	PGPT0003985_9	1	Slacri	PGPT0004995_1389	1	Sreticuliscabiei	PGPT0004700_1220	1	Sturgidiscabies	PGPT0004470_879	1	Sgeranii	PGPT0004225_259	1
BCCO_861	PGPT0004005_104	1	Slacri	PGPT0004995_2016	1	Sreticuliscabiei	PGPT0004700_1307	1	Sturgidiscabies	PGPT0004495_2	1	Sgeranii	PGPT0004230_336	1
BCCO_861	PGPT0004005_12	1	Slacri	PGPT0004995_338	1	Sreticuliscabiei	PGPT0004700_2177	1	Sturgidiscabies	PGPT0004545_271	1	Sgeranii	PGPT0004250_2693	1
BCCO_861	PGPT0004005_196	1	Slacri	PGPT0004995_565	1	Sreticuliscabiei	PGPT0004700_2219	1	Sturgidiscabies	PGPT0004550_25	1	Sgeranii	PGPT0004255_1555	1
BCCO_861	PGPT0004005_38	1	Slacri	PGPT0005000_54	1	Sreticuliscabiei	PGPT0004705_506	1	Sturgidiscabies	PGPT0004575_124	1	Sgeranii	PGPT0004255_3389	1
BCCO_861	PGPT0004005_53	1	Slacri	PGPT0005000_866	1	Sreticuliscabiei	PGPT0004710_1666	1	Sturgidiscabies	PGPT0004575_253	1	Sgeranii	PGPT0004265_271	1
BCCO_861	PGPT0004005_54	1	Slacri	PGPT0005005_134	1	Sreticuliscabiei	PGPT0004715_2396	1	Sturgidiscabies	PGPT0004575_257	1	Sgeranii	PGPT0004270_351	1
BCCO_861	PGPT0004005_7	1	Slacri	PGPT0005005_3881	1	Sreticuliscabiei	PGPT0004720_61	1	Sturgidiscabies	PGPT0004575_434	1	Sgeranii	PGPT0004275_745	1
BCCO_861	PGPT0004015_131	1	Slacri	PGPT0005010_228	1	Sreticuliscabiei	PGPT0004735_2000	1	Sturgidiscabies	PGPT0004580_404	1	Sgeranii	PGPT0004290_84	1
BCCO_861	PGPT0004020_1067	1	Slacri	PGPT0005015_1140	2	Sreticuliscabiei	PGPT0004735_2776	1	Sturgidiscabies	PGPT0004585_76	1	Sgeranii	PGPT0004300_98	1
BCCO_861	PGPT0004020_1388	1	Slacri	PGPT0005015_136	1	Sreticuliscabiei	PGPT0004735_4764	1	Sturgidiscabies	PGPT0004590_923	1	Sgeranii	PGPT0004390_494	1
BCCO_861	PGPT0004020_18	2	Slacri	PGPT0005015_958	1	Sreticuliscabiei	PGPT0004735_681	1	Sturgidiscabies	PGPT0004595_102	2	Sgeranii	PGPT0004400_80	1
BCCO_861	PGPT0004020_2797	1	Slacri	PGPT0005020_237	1	Sreticuliscabiei	PGPT0004735_738	1	Sturgidiscabies	PGPT0004595_357	1	Sgeranii	PGPT0004430_11	11
BCCO_861	PGPT0004020_334	1	Slacri	PGPT0005020_28	1	Sreticuliscabiei	PGPT0004750_1243	1	Sturgidiscabies	PGPT0004595_44	1	Sgeranii	PGPT0004430_11340	1
BCCO_861	PGPT0004020_4965	2	Slacri	PGPT0005025_299	1	Sreticuliscabiei	PGPT0004750_1257	1	Sturgidiscabies	PGPT0004605_133	1	Sgeranii	PGPT0004430_11771	1
BCCO_861	PGPT0004020_5109	1	Slacri	PGPT0005030_287	1	Sreticuliscabiei	PGPT0004750_1281	1	Sturgidiscabies	PGPT0004610_240	1	Sgeranii	PGPT0004430_12674	1
BCCO_861	PGPT0004020_5570	1	Slacri	PGPT0005050_1061	2	Sreticuliscabiei	PGPT0004760_1063	1	Sturgidiscabies	PGPT0004615_664	1	Sgeranii	PGPT0004430_12776	1
BCCO_861	PGPT0004020_868	1	Slacri	PGPT0005050_1240	1	Sreticuliscabiei	PGPT0004760_2074	1	Sturgidiscabies	PGPT0004625_229	1	Sgeranii	PGPT0004430_14098	1
BCCO_861	PGPT0004025_1382	1	Slacri	PGPT0005060_238	1	Sreticuliscabiei	PGPT0004770_1204	1	Sturgidiscabies	PGPT0004640_606	1	Sgeranii	PGPT0004430_14341	1
BCCO_861	PGPT0004030_1985	1	Slacri	PGPT0005065_190	1	Sreticuliscabiei	PGPT0004770_886	1	Sturgidiscabies	PGPT0004645_1600	1	Sgeranii	PGPT0004430_14477	1
BCCO_861	PGPT0004035_2690	1	Slacri	PGPT0005065_726	1	Sreticuliscabiei	PGPT0004775_229	1	Sturgidiscabies	PGPT0004660_1002	1	Sgeranii	PGPT0004430_16745	1
BCCO_861	PGPT0004055_2361	1	Slacri	PGPT0005085_2	1	Sreticuliscabiei	PGPT0004790_238	1	Sturgidiscabies	PGPT0004690_629	1	Sgeranii	PGPT0004430_17949	1
BCCO_861	PGPT0004055_4229	1	Slacri	PGPT0005115_3	3	Sreticuliscabiei	PGPT0004825_318	1	Sturgidiscabies	PGPT0004695_1371	1	Sgeranii	PGPT0004430_2329	1
BCCO_861	PGPT0004080_17	1	Slacri	PGPT0005140_124	1	Sreticuliscabiei	PGPT0004890_1110	1	Sturgidiscabies	PGPT0004700_1245	1	Sgeranii	PGPT0004430_2410	1
BCCO_861	PGPT0004085_1501	1	Slacri	PGPT0005211_184	1	Sreticuliscabiei	PGPT0004890_22	1	Sturgidiscabies	PGPT0004700_2177	1	Sgeranii	PGPT0004430_2809	1
BCCO_861	PGPT0004090_5549	1	Slacri	PGPT0005215_178	1	Sreticuliscabiei	PGPT0004890_220	1	Sturgidiscabies	PGPT0004700_2219	1	Sgeranii	PGPT0004430_346	1
BCCO_861	PGPT0004090_5682	1	Slacri	PGPT0005215_24	1	Sreticuliscabiei	PGPT0004890_2552	1	Sturgidiscabies	PGPT0004705_506	1	Sgeranii	PGPT0004430_3859	1
BCCO_861	PGPT0004090_5717	1	Slacri	PGPT0005220_123	1	Sreticuliscabiei	PGPT0004890_2912	1	Sturgidiscabies	PGPT0004710_1666	1	Sgeranii	PGPT0004430_3935	1
BCCO_861	PGPT0004090_5771	2	Slacri	PGPT0005220_338	1	Sreticuliscabiei	PGPT0004890_735	1	Sturgidiscabies	PGPT0004715_2396	1	Sgeranii	PGPT0004430_45	2
BCCO_861	PGPT0004090_6052	1	Slacri	PGPT0005230_4	1	Sreticuliscabiei	PGPT0004895_100	1	Sturgidiscabies	PGPT0004720_61	1	Sgeranii	PGPT0004430_5995	1
BCCO_861	PGPT0004090_6191	1	Slacri	PGPT0005235_10	1	Sreticuliscabiei	PGPT0004895_152	1	Sturgidiscabies	PGPT0004735_2000	1	Sgeranii	PGPT0004430_6697	1
BCCO_861	PGPT0004090_640	1	Slacri	PGPT0005270_43	1	Sreticuliscabiei	PGPT0004895_193	1	Sturgidiscabies	PGPT0004735_2776	1	Sgeranii	PGPT0004430_7606	1
BCCO_861	PGPT0004090_7949	1	Slacri	PGPT0005315_201	1	Sreticuliscabiei	PGPT0004895_213	1	Sturgidiscabies	PGPT0004735_4764	1	Sgeranii	PGPT0004430_7804	1
BCCO_861	PGPT0004095_149	1	Slacri	PGPT0005385_169	1	Sreticuliscabiei	PGPT0004895_368	1	Sturgidiscabies	PGPT0004735_681	1	Sgeranii	PGPT0004430_9764	1
BCCO_861	PGPT0004095_162	1	Slacri	PGPT0005400_1359	1	Sreticuliscabiei	PGPT0004895_396	1	Sturgidiscabies	PGPT0004735_738	1	Sgeranii	PGPT0004435_11517	1
BCCO_861	PGPT0004095_251	1	Slacri	PGPT0005405_108	1	Sreticuliscabiei	PGPT0004895_48	1	Sturgidiscabies	PGPT0004750_1243	1	Sgeranii	PGPT0004435_12746	1
BCCO_861	PGPT0004095_259	1	Slacri	PGPT0005405_165	1	Sreticuliscabiei	PGPT0004895_57	1	Sturgidiscabies	PGPT0004750_1257	1	Sgeranii	PGPT0004435_1331	1
BCCO_861	PGPT0004095_599	1	Slacri	PGPT0005405_428	1	Sreticuliscabiei	PGPT0004905_1156	1	Sturgidiscabies	PGPT0004750_1281	1	Sgeranii	PGPT0004435_1968	1
BCCO_861	PGPT0004100_1780	1	Slacri	PGPT0005470_43	1	Sreticuliscabiei	PGPT0004905_1843	1	Sturgidiscabies	PGPT0004760_1063	1	Sgeranii	PGPT0004435_2724	1
BCCO_861	PGPT0004100_1795	1	Slacri	PGPT0005490_50	1	Sreticuliscabiei	PGPT0004910_1377	2	Sturgidiscabies	PGPT0004760_2074	1	Sgeranii	PGPT0004435_3528	1
BCCO_861	PGPT0004100_2527	1	Slacri	PGPT0005495_63	1	Sreticuliscabiei	PGPT0004910_640	1	Sturgidiscabies	PGPT0004770_1204	1	Sgeranii	PGPT0004435_3604	1
BCCO_861	PGPT0004100_2724	1	Slacri	PGPT0005515_2	1	Sreticuliscabiei	PGPT0004910_705	1	Sturgidiscabies	PGPT0004770_886	1	Sgeranii	PGPT0004435_4542	1
BCCO_861	PGPT0004100_2854	1	Slacri	PGPT0005525_34	1	Sreticuliscabiei	PGPT0004910_862	1	Sturgidiscabies	PGPT0004775_229	1	Sgeranii	PGPT0004435_5853	1
BCCO_861	PGPT0004100_3061	1	Slacri	PGPT0005570_473	1	Sreticuliscabiei	PGPT0004910_908	1	Sturgidiscabies	PGPT0004790_238	1	Sgeranii	PGPT0004435_6131	1
BCCO_861	PGPT0004100_3109	1	Slacri	PGPT0005575_27	1	Sreticuliscabiei	PGPT0004915_124	1	Sturgidiscabies	PGPT0004825_318	1	Sgeranii	PGPT0004435_6948	1
BCCO_861	PGPT0004100_335	1	Slacri	PGPT0005575_611	1	Sreticuliscabiei	PGPT0004915_278	1	Sturgidiscabies	PGPT0004890_1110	1	Sgeranii	PGPT0004435_7304	1
BCCO_861	PGPT0004100_4104	1	Slacri	PGPT0005685_2491	1	Sreticuliscabiei	PGPT0004915_330	1	Sturgidiscabies	PGPT0004890_22	1	Sgeranii	PGPT0004435_7695	1
BCCO_861	PGPT0004100_466	1	Slacri	PGPT0005685_2498	1	Sreticuliscabiei	PGPT0004960_1921	1	Sturgidiscabies	PGPT0004890_220	1	Sgeranii	PGPT0004435_8254	1
BCCO_861	PGPT0004100_547	1	Slacri	PGPT0005685_3645	1	Sreticuliscabiei	PGPT0004980_967	1	Sturgidiscabies	PGPT0004890_2552	1	Sgeranii	PGPT0004435_830	1
BCCO_861	PGPT0004100_976	1	Slacri	PGPT0005785_283	1	Sreticuliscabiei	PGPT0004985_5108	1	Sturgidiscabies	PGPT0004890_2912	1	Sgeranii	PGPT0004435_8438	1
BCCO_861	PGPT0004105_1059	1	Slacri	PGPT0005825_47	1	Sreticuliscabiei	PGPT0004985_661	1	Sturgidiscabies	PGPT0004890_735	1	Sgeranii	PGPT0004435_940	2
BCCO_861	PGPT0004105_1307	1	Slacri	PGPT0005865_315	1	Sreticuliscabiei	PGPT0004995_1025	1	Sturgidiscabies	PGPT0004895_100	1	Sgeranii	PGPT0004435_9584	1
BCCO_861	PGPT0004105_1385	1	Slacri	PGPT0005915_120	1	Sreticuliscabiei	PGPT0004995_1054	1	Sturgidiscabies	PGPT0004895_152	1	Sgeranii	PGPT0004440_6113	1
BCCO_861	PGPT0004105_1420	1	Slacri	PGPT0005915_533	1	Sreticuliscabiei	PGPT0004995_1240	1	Sturgidiscabies	PGPT0004895_193	1	Sgeranii	PGPT0004440_6338	1
BCCO_861	PGPT0004105_1724	1	Slacri	PGPT0005930_2937	1	Sreticuliscabiei	PGPT0004995_1387	1	Sturgidiscabies	PGPT0004895_234	1	Sgeranii	PGPT0004440_6461	1
BCCO_861	PGPT0004105_412	1	Slacri	PGPT0005930_3012	1	Sreticuliscabiei	PGPT0004995_232	1	Sturgidiscabies	PGPT0004895_282	1	Sgeranii	PGPT0004440_6966	1
BCCO_861	PGPT0004120_55	1	Slacri	PGPT0005930_918	1	Sreticuliscabiei	PGPT0004995_2467	1	Sturgidiscabies	PGPT0004895_368	1	Sgeranii	PGPT0004440_7201	1
BCCO_861	PGPT0004125_2962	1	Slacri	PGPT0006025_956	1	Sreticuliscabiei	PGPT0004995_341	1	Sturgidiscabies	PGPT0004895_396	1	Sgeranii	PGPT0004440_9884	1
BCCO_861	PGPT0004125_358	1	Slacri	PGPT0006035_777	1	Sreticuliscabiei	PGPT0004995_523	1	Sturgidiscabies	PGPT0004905_1156	1	Sgeranii	PGPT0004445_10050	1
BCCO_861	PGPT0004130_399	1	Slacri	PGPT0006045_611	1	Sreticuliscabiei	PGPT0004995_563	1	Sturgidiscabies	PGPT0004905_1843	1	Sgeranii	PGPT0004445_10072	1
BCCO_861	PGPT0004130_514	1	Slacri	PGPT0006050_370	1	Sreticuliscabiei	PGPT0004995_565	1	Sturgidiscabies	PGPT0004910_1377	2	Sgeranii	PGPT0004445_1114	1
BCCO_861	PGPT0004135_104	1	Slacri	PGPT0006055_279	1	Sreticuliscabiei	PGPT0004995_928	1	Sturgidiscabies	PGPT0004910_640	1	Sgeranii	PGPT0004445_12447	1
BCCO_861	PGPT0004135_1070	1	Slacri	PGPT0006060_564	1	Sreticuliscabiei	PGPT0005000_866	1	Sturgidiscabies	PGPT0004910_705	1	Sgeranii	PGPT0004445_12841	1
BCCO_861	PGPT0004135_1285	1	Slacri	PGPT0006065_169	1	Sreticuliscabiei	PGPT0005005_1392	1	Sturgidiscabies	PGPT0004910_862	1	Sgeranii	PGPT0004445_2204	1
BCCO_861	PGPT0004135_1756	1	Slacri	PGPT0006070_1105	1	Sreticuliscabiei	PGPT0005005_1410	1	Sturgidiscabies	PGPT0004910_908	1	Sgeranii	PGPT0004445_3476	1
BCCO_861	PGPT0004135_2084	1	Slacri	PGPT0006070_146	1	Sreticuliscabiei	PGPT0005005_2327	1	Sturgidiscabies	PGPT0004915_278	1	Sgeranii	PGPT0004445_41	1
BCCO_861	PGPT0004135_475	1	Slacri	PGPT0006070_152	1	Sreticuliscabiei	PGPT0005005_3881	1	Sturgidiscabies	PGPT0004915_330	1	Sgeranii	PGPT0004445_4948	1
BCCO_861	PGPT0004136_236	1	Slacri	PGPT0006070_2302	1	Sreticuliscabiei	PGPT0005005_4112	1	Sturgidiscabies	PGPT0004960_1921	1	Sgeranii	PGPT0004445_5788	1
BCCO_861	PGPT0004136_341	1	Slacri	PGPT0006070_3	1	Sreticuliscabiei	PGPT0005005_762	1	Sturgidiscabies	PGPT0004980_967	1	Sgeranii	PGPT0004445_6391	1
BCCO_861	PGPT0004136_62	1	Slacri	PGPT0006070_661	1	Sreticuliscabiei	PGPT0005010_228	1	Sturgidiscabies	PGPT0004985_5108	1	Sgeranii	PGPT0004445_7800	1
BCCO_861	PGPT0004149_1	1	Slacri	PGPT0006075_1922	1	Sreticuliscabiei	PGPT0005015_1140	2	Sturgidiscabies	PGPT0004985_661	1	Sgeranii	PGPT0004445_7819	1
BCCO_861	PGPT0004151_1	1	Slacri	PGPT0006075_4455	1	Sreticuliscabiei	PGPT0005020_109	1	Sturgidiscabies	PGPT0004995_1025	1	Sgeranii	PGPT0004445_7835	1
BCCO_861	PGPT0004160_46	1	Slacri	PGPT0006075_59	1	Sreticuliscabiei	PGPT0005020_253	1	Sturgidiscabies	PGPT0004995_1054	1	Sgeranii	PGPT0004445_8825	1
BCCO_861	PGPT0004175_1363	1	Slacri	PGPT0006075_734	1	Sreticuliscabiei	PGPT0005020_43	1	Sturgidiscabies	PGPT0004995_1240	1	Sgeranii	PGPT0004445_8907	1
BCCO_861	PGPT0004175_181	1	Slacri	PGPT0006090_694	1	Sreticuliscabiei	PGPT0005035_606	1	Sturgidiscabies	PGPT0004995_1387	1	Sgeranii	PGPT0004450_11927	1
BCCO_861	PGPT0004190_2107	1	Slacri	PGPT0006090_695	1	Sreticuliscabiei	PGPT0005035_871	1	Sturgidiscabies	PGPT0004995_232	1	Sgeranii	PGPT0004450_13509	1
BCCO_861	PGPT0004195_1143	1	Slacri	PGPT0006090_872	1	Sreticuliscabiei	PGPT0005045_577	1	Sturgidiscabies	PGPT0004995_2467	1	Sgeranii	PGPT0004450_13985	1
BCCO_861	PGPT0004195_502	1	Slacri	PGPT0006105_410	1	Sreticuliscabiei	PGPT0005055_230	1	Sturgidiscabies	PGPT0004995_341	1	Sgeranii	PGPT0004450_14064	1
BCCO_861	PGPT0004200_3336	1	Slacri	PGPT0006110_87	1	Sreticuliscabiei	PGPT0005055_586	1	Sturgidiscabies	PGPT0004995_431	1	Sgeranii	PGPT0004450_2820	1
BCCO_861	PGPT0004215_80	1	Slacri	PGPT0006115_144	1	Sreticuliscabiei	PGPT0005060_271	1	Sturgidiscabies	PGPT0004995_523	1	Sgeranii	PGPT0004450_2876	1
BCCO_861	PGPT0004220_1412	1	Slacri	PGPT0006115_6130	1	Sreticuliscabiei	PGPT0005065_138	1	Sturgidiscabies	PGPT0004995_563	1	Sgeranii	PGPT0004450_3322	1
BCCO_861	PGPT0004225_259	1	Slacri	PGPT0006115_6520	1	Sreticuliscabiei	PGPT0005065_726	1	Sturgidiscabies	PGPT0004995_565	1	Sgeranii	PGPT0004450_3355	1
BCCO_861	PGPT0004230_336	1	Slacri	PGPT0006150_37	1	Sreticuliscabiei	PGPT0005070_245	1	Sturgidiscabies	PGPT0005000_866	1	Sgeranii	PGPT0004450_4257	1
BCCO_861	PGPT0004255_1414	1	Slacri	PGPT0006170_571	1	Sreticuliscabiei	PGPT0005075_216	1	Sturgidiscabies	PGPT0005005_1392	1	Sgeranii	PGPT0004450_5281	1
BCCO_861	PGPT0004255_1432	1	Slacri	PGPT0006170_635	1	Sreticuliscabiei	PGPT0005130_299	1	Sturgidiscabies	PGPT0005005_1410	1	Sgeranii	PGPT0004450_8497	1
BCCO_861	PGPT0004265_273	1	Slacri	PGPT0006195_35	1	Sreticuliscabiei	PGPT0005140_138	1	Sturgidiscabies	PGPT0005005_2327	1	Sgeranii	PGPT0004450_8815	1
BCCO_861	PGPT0004265_352	1	Slacri	PGPT0006315_10	1	Sreticuliscabiei	PGPT0005210_1105	1	Sturgidiscabies	PGPT0005005_3881	1	Sgeranii	PGPT0004455_1072	1
BCCO_861	PGPT0004270_338	1	Slacri	PGPT0006315_1676	1	Sreticuliscabiei	PGPT0005210_1549	1	Sturgidiscabies	PGPT0005005_4112	1	Sgeranii	PGPT0004460_42	1
BCCO_861	PGPT0004270_349	1	Slacri	PGPT0006355_1421	1	Sreticuliscabiei	PGPT0005211_149	1	Sturgidiscabies	PGPT0005005_762	1	Sgeranii	PGPT0004470_883	1
BCCO_861	PGPT0004270_351	1	Slacri	PGPT0006355_3606	1	Sreticuliscabiei	PGPT0005211_758	1	Sturgidiscabies	PGPT0005010_228	1	Sgeranii	PGPT0004495_25	1
BCCO_861	PGPT0004275_1671	1	Slacri	PGPT0006355_3854	1	Sreticuliscabiei	PGPT0005215_29	1	Sturgidiscabies	PGPT0005015_1140	3	Sgeranii	PGPT0004545_149	1
BCCO_861	PGPT0004275_637	1	Slacri	PGPT0006365_1	1	Sreticuliscabiei	PGPT0005220_187	1	Sturgidiscabies	PGPT0005015_136	1	Sgeranii	PGPT0004550_25	1
BCCO_861	PGPT0004275_745	1	Slacri	PGPT0006365_14	1	Sreticuliscabiei	PGPT0005220_310	1	Sturgidiscabies	PGPT0005020_109	1	Sgeranii	PGPT0004555_116	1
BCCO_861	PGPT0004300_228	1	Slacri	PGPT0006365_1573	1	Sreticuliscabiei	PGPT0005220_338	1	Sturgidiscabies	PGPT0005020_253	1	Sgeranii	PGPT0004575_108	1
BCCO_861	PGPT0004300_98	1	Slacri	PGPT0006365_1949	1	Sreticuliscabiei	PGPT0005230_2	2	Sturgidiscabies	PGPT0005020_43	1	Sgeranii	PGPT0004575_253	1
BCCO_861	PGPT0004310_129	1	Slacri	PGPT0006365_963	1	Sreticuliscabiei	PGPT0005235_10	1	Sturgidiscabies	PGPT0005035_606	1	Sgeranii	PGPT0004575_430	1
BCCO_861	PGPT0004390_382	1	Slacri	PGPT0006375_1293	1	Sreticuliscabiei	PGPT0005270_17	1	Sturgidiscabies	PGPT0005035_871	1	Sgeranii	PGPT0004575_434	1
BCCO_861	PGPT0004390_414	1	Slacri	PGPT0006375_908	1	Sreticuliscabiei	PGPT0005280_236	1	Sturgidiscabies	PGPT0005045_577	1	Sgeranii	PGPT0004575_71	1
BCCO_861	PGPT0004400_91	1	Slacri	PGPT0006375_922	1	Sreticuliscabiei	PGPT0005280_281	1	Sturgidiscabies	PGPT0005055_230	1	Sgeranii	PGPT0004575_9	1
BCCO_861	PGPT0004430_11	13	Slacri	PGPT0006525_1	2	Sreticuliscabiei	PGPT0005285_36	2	Sturgidiscabies	PGPT0005055_509	1	Sgeranii	PGPT0004580_49	1
BCCO_861	PGPT0004430_11340	1	Slacri	PGPT0006535_4	1	Sreticuliscabiei	PGPT0005285_72	1	Sturgidiscabies	PGPT0005055_586	2	Sgeranii	PGPT0004580_870	1
BCCO_861	PGPT0004430_12502	1	Slacri	PGPT0006635_2	1	Sreticuliscabiei	PGPT0005290_3	1	Sturgidiscabies	PGPT0005060_271	1	Sgeranii	PGPT0004595_64	1
BCCO_861	PGPT0004430_12674	1	Slacri	PGPT0006645_117	1	Sreticuliscabiei	PGPT0005315_201	1	Sturgidiscabies	PGPT0005065_138	1	Sgeranii	PGPT0004605_584	1
BCCO_861	PGPT0004430_12750	1	Slacri	PGPT0006645_219	1	Sreticuliscabiei	PGPT0005315_462	1	Sturgidiscabies	PGPT0005065_726	2	Sgeranii	PGPT0004610_1017	1
BCCO_861	PGPT0004430_13106	1	Slacri	PGPT0006645_990	1	Sreticuliscabiei	PGPT0005315_629	1	Sturgidiscabies	PGPT0005070_245	1	Sgeranii	PGPT0004625_1644	1
BCCO_861	PGPT0004430_14082	1	Slacri	PGPT0006655_320	2	Sreticuliscabiei	PGPT0005315_724	1	Sturgidiscabies	PGPT0005075_216	1	Sgeranii	PGPT0004640_542	1
BCCO_861	PGPT0004430_14939	2	Slacri	PGPT0006655_348	1	Sreticuliscabiei	PGPT0005315_826	1	Sturgidiscabies	PGPT0005130_299	1	Sgeranii	PGPT0004645_1619	1
BCCO_861	PGPT0004430_16734	1	Slacri	PGPT0006660_18	1	Sreticuliscabiei	PGPT0005390_401	1	Sturgidiscabies	PGPT0005140_138	1	Sgeranii	PGPT0004650_234	1
BCCO_861	PGPT0004430_17949	1	Slacri	PGPT0006670_180	1	Sreticuliscabiei	PGPT0005390_497	1	Sturgidiscabies	PGPT0005210_1105	1	Sgeranii	PGPT0004660_2113	1
BCCO_861	PGPT0004430_2329	2	Slacri	PGPT0006670_204	1	Sreticuliscabiei	PGPT0005405_428	1	Sturgidiscabies	PGPT0005210_1549	1	Sgeranii	PGPT0004695_1371	1
BCCO_861	PGPT0004430_2384	1	Slacri	PGPT0006680_192	1	Sreticuliscabiei	PGPT0005425_499	1	Sturgidiscabies	PGPT0005211_149	1	Sgeranii	PGPT0004700_1245	1
BCCO_861	PGPT0004430_2410	1	Slacri	PGPT0006695_144	1	Sreticuliscabiei	PGPT0005425_550	1	Sturgidiscabies	PGPT0005211_758	1	Sgeranii	PGPT0004700_2177	1
BCCO_861	PGPT0004430_324	1	Slacri	PGPT0006695_19	2	Sreticuliscabiei	PGPT0005470_75	1	Sturgidiscabies	PGPT0005215_29	1	Sgeranii	PGPT0004700_2212	1
BCCO_861	PGPT0004430_3428	1	Slacri	PGPT0006695_26	1	Sreticuliscabiei	PGPT0005490_50	1	Sturgidiscabies	PGPT0005220_187	1	Sgeranii	PGPT0004710_1262	1
BCCO_861	PGPT0004430_346	1	Slacri	PGPT0006700_311	1	Sreticuliscabiei	PGPT0005520_88	1	Sturgidiscabies	PGPT0005220_203	1	Sgeranii	PGPT0004715_2396	1
BCCO_861	PGPT0004430_359	1	Slacri	PGPT0006700_347	1	Sreticuliscabiei	PGPT0005570_473	1	Sturgidiscabies	PGPT0005220_338	1	Sgeranii	PGPT0004715_957	1
BCCO_861	PGPT0004430_3859	1	Slacri	PGPT0006700_459	2	Sreticuliscabiei	PGPT0005575_288	1	Sturgidiscabies	PGPT0005230_2	2	Sgeranii	PGPT0004720_2001	1
BCCO_861	PGPT0004430_45	2	Slacri	PGPT0006700_56	1	Sreticuliscabiei	PGPT0005575_611	1	Sturgidiscabies	PGPT0005235_10	1	Sgeranii	PGPT0004735_1278	1
BCCO_861	PGPT0004430_49	1	Slacri	PGPT0006700_61	1	Sreticuliscabiei	PGPT0005600_243	1	Sturgidiscabies	PGPT0005270_17	1	Sgeranii	PGPT0004735_2000	1
BCCO_861	PGPT0004430_7606	1	Slacri	PGPT0006715_139	1	Sreticuliscabiei	PGPT0005685_2498	1	Sturgidiscabies	PGPT0005280_281	1	Sgeranii	PGPT0004735_2776	2
BCCO_861	PGPT0004430_7960	1	Slacri	PGPT0006725_10482	1	Sreticuliscabiei	PGPT0005685_3645	1	Sturgidiscabies	PGPT0005285_36	1	Sgeranii	PGPT0004735_4476	1
BCCO_861	PGPT0004430_9236	1	Slacri	PGPT0006725_11109	1	Sreticuliscabiei	PGPT0005780_104	1	Sturgidiscabies	PGPT0005285_72	1	Sgeranii	PGPT0004735_5248	1
BCCO_861	PGPT0004430_9387	1	Slacri	PGPT0006725_13697	1	Sreticuliscabiei	PGPT0005780_106	1	Sturgidiscabies	PGPT0005315_201	1	Sgeranii	PGPT0004735_687	1
BCCO_861	PGPT0004430_9885	1	Slacri	PGPT0006725_17192	1	Sreticuliscabiei	PGPT0005780_57	1	Sturgidiscabies	PGPT0005315_462	1	Sgeranii	PGPT0004735_738	1
BCCO_861	PGPT0004435_13113	2	Slacri	PGPT0006725_172	1	Sreticuliscabiei	PGPT0005780_65	1	Sturgidiscabies	PGPT0005315_608	1	Sgeranii	PGPT0004750_1231	1
BCCO_861	PGPT0004435_14413	1	Slacri	PGPT0006725_20465	1	Sreticuliscabiei	PGPT0005785_139	1	Sturgidiscabies	PGPT0005315_629	1	Sgeranii	PGPT0004750_1257	1
BCCO_861	PGPT0004435_1968	1	Slacri	PGPT0006725_21026	1	Sreticuliscabiei	PGPT0005825_3	1	Sturgidiscabies	PGPT0005315_724	1	Sgeranii	PGPT0004750_1261	1
BCCO_861	PGPT0004435_2179	1	Slacri	PGPT0006725_21724	2	Sreticuliscabiei	PGPT0005825_47	1	Sturgidiscabies	PGPT0005315_826	1	Sgeranii	PGPT0004750_1404	1
BCCO_861	PGPT0004435_2217	1	Slacri	PGPT0006725_22199	1	Sreticuliscabiei	PGPT0005825_51	1	Sturgidiscabies	PGPT0005380_65	1	Sgeranii	PGPT0004760_1077	1
BCCO_861	PGPT0004435_2459	1	Slacri	PGPT0006725_22227	1	Sreticuliscabiei	PGPT0005865_315	1	Sturgidiscabies	PGPT0005390_401	1	Sgeranii	PGPT0004760_2046	1
BCCO_861	PGPT0004435_4293	1	Slacri	PGPT0006725_2349	1	Sreticuliscabiei	PGPT0005915_171	1	Sturgidiscabies	PGPT0005390_497	1	Sgeranii	PGPT0004770_923	1
BCCO_861	PGPT0004435_5915	1	Slacri	PGPT0006725_29006	1	Sreticuliscabiei	PGPT0005930_2302	1	Sturgidiscabies	PGPT0005405_428	1	Sgeranii	PGPT0004775_229	1
BCCO_861	PGPT0004435_5993	1	Slacri	PGPT0006725_29016	1	Sreticuliscabiei	PGPT0005930_266	1	Sturgidiscabies	PGPT0005425_402	1	Sgeranii	PGPT0004790_238	1
BCCO_861	PGPT0004435_6131	1	Slacri	PGPT0006725_3164	1	Sreticuliscabiei	PGPT0005930_2831	1	Sturgidiscabies	PGPT0005470_75	1	Sgeranii	PGPT0004825_318	1
BCCO_861	PGPT0004435_6948	1	Slacri	PGPT0006725_3507	1	Sreticuliscabiei	PGPT0005930_918	1	Sturgidiscabies	PGPT0005490_50	1	Sgeranii	PGPT0004890_29	1
BCCO_861	PGPT0004435_7304	1	Slacri	PGPT0006725_361	1	Sreticuliscabiei	PGPT0006005_110	1	Sturgidiscabies	PGPT0005520_88	1	Sgeranii	PGPT0004890_485	1
BCCO_861	PGPT0004435_7695	1	Slacri	PGPT0006725_368	1	Sreticuliscabiei	PGPT0006010_283	1	Sturgidiscabies	PGPT0005570_473	1	Sgeranii	PGPT0004890_735	1
BCCO_861	PGPT0004435_803	1	Slacri	PGPT0006725_4013	1	Sreticuliscabiei	PGPT0006025_945	1	Sturgidiscabies	PGPT0005575_288	1	Sgeranii	PGPT0004895_234	1
BCCO_861	PGPT0004435_830	1	Slacri	PGPT0006725_4242	1	Sreticuliscabiei	PGPT0006035_777	1	Sturgidiscabies	PGPT0005575_611	1	Sgeranii	PGPT0004895_282	1
BCCO_861	PGPT0004435_8438	1	Slacri	PGPT0006725_4656	1	Sreticuliscabiei	PGPT0006045_611	1	Sturgidiscabies	PGPT0005600_243	1	Sgeranii	PGPT0004895_35	1
BCCO_861	PGPT0004440_6113	1	Slacri	PGPT0006725_4855	1	Sreticuliscabiei	PGPT0006050_401	1	Sturgidiscabies	PGPT0005685_2498	1	Sgeranii	PGPT0004895_358	1
BCCO_861	PGPT0004440_6291	1	Slacri	PGPT0006725_5450	1	Sreticuliscabiei	PGPT0006055_279	1	Sturgidiscabies	PGPT0005685_3645	1	Sgeranii	PGPT0004895_76	1
BCCO_861	PGPT0004440_6338	1	Slacri	PGPT0006725_553	1	Sreticuliscabiei	PGPT0006060_564	1	Sturgidiscabies	PGPT0005780_104	1	Sgeranii	PGPT0004900_147	1
BCCO_861	PGPT0004440_6461	1	Slacri	PGPT0006725_5823	1	Sreticuliscabiei	PGPT0006065_169	1	Sturgidiscabies	PGPT0005780_57	1	Sgeranii	PGPT0004905_1156	1
BCCO_861	PGPT0004440_6542	1	Slacri	PGPT0006725_5869	1	Sreticuliscabiei	PGPT0006070_1105	1	Sturgidiscabies	PGPT0005780_65	1	Sgeranii	PGPT0004905_1816	1
BCCO_861	PGPT0004440_6966	1	Slacri	PGPT0006725_5925	1	Sreticuliscabiei	PGPT0006070_1613	1	Sturgidiscabies	PGPT0005785_139	1	Sgeranii	PGPT0004905_1843	1
BCCO_861	PGPT0004440_8858	1	Slacri	PGPT0006725_6093	1	Sreticuliscabiei	PGPT0006070_1639	1	Sturgidiscabies	PGPT0005825_47	1	Sgeranii	PGPT0004910_1377	1
BCCO_861	PGPT0004445_10050	1	Slacri	PGPT0006725_684	1	Sreticuliscabiei	PGPT0006070_2302	1	Sturgidiscabies	PGPT0005825_60	1	Sgeranii	PGPT0004910_260	1
BCCO_861	PGPT0004445_10072	1	Slacri	PGPT0006725_9000	1	Sreticuliscabiei	PGPT0006070_453	1	Sturgidiscabies	PGPT0005865_315	1	Sgeranii	PGPT0004910_640	1
BCCO_861	PGPT0004445_12845	1	Slacri	PGPT0006725_9676	1	Sreticuliscabiei	PGPT0006070_557	1	Sturgidiscabies	PGPT0005915_171	1	Sgeranii	PGPT0004910_705	1
BCCO_861	PGPT0004445_13701	1	Slacri	PGPT0006730_10754	1	Sreticuliscabiei	PGPT0006070_588	1	Sturgidiscabies	PGPT0005930_2302	1	Sgeranii	PGPT0004910_862	1
BCCO_861	PGPT0004445_3448	1	Slacri	PGPT0006730_11722	1	Sreticuliscabiei	PGPT0006075_2940	1	Sturgidiscabies	PGPT0005930_266	1	Sgeranii	PGPT0004910_881	1
BCCO_861	PGPT0004445_3495	1	Slacri	PGPT0006730_11888	1	Sreticuliscabiei	PGPT0006075_4658	1	Sturgidiscabies	PGPT0005930_2831	1	Sgeranii	PGPT0004915_34	1
BCCO_861	PGPT0004445_35	1	Slacri	PGPT0006730_12987	1	Sreticuliscabiei	PGPT0006075_51	1	Sturgidiscabies	PGPT0005930_2834	1	Sgeranii	PGPT0004960_1921	2
BCCO_861	PGPT0004445_5788	1	Slacri	PGPT0006730_13071	1	Sreticuliscabiei	PGPT0006075_731	1	Sturgidiscabies	PGPT0005930_918	1	Sgeranii	PGPT0004985_5108	1
BCCO_861	PGPT0004445_6603	1	Slacri	PGPT0006730_13158	1	Sreticuliscabiei	PGPT0006080_4	1	Sturgidiscabies	PGPT0006005_110	1	Sgeranii	PGPT0004985_625	1
BCCO_861	PGPT0004445_666	1	Slacri	PGPT0006730_1318	1	Sreticuliscabiei	PGPT0006090_694	1	Sturgidiscabies	PGPT0006010_283	1	Sgeranii	PGPT0004990_20	1
BCCO_861	PGPT0004445_76	1	Slacri	PGPT0006730_14418	1	Sreticuliscabiei	PGPT0006090_864	1	Sturgidiscabies	PGPT0006010_295	1	Sgeranii	PGPT0004995_1025	1
BCCO_861	PGPT0004445_7819	1	Slacri	PGPT0006730_15468	2	Sreticuliscabiei	PGPT0006105_756	1	Sturgidiscabies	PGPT0006025_945	1	Sgeranii	PGPT0004995_1240	1
BCCO_861	PGPT0004445_8693	1	Slacri	PGPT0006730_15699	1	Sreticuliscabiei	PGPT0006110_273	1	Sturgidiscabies	PGPT0006035_777	1	Sgeranii	PGPT0004995_1249	1
BCCO_861	PGPT0004445_8825	1	Slacri	PGPT0006730_16735	1	Sreticuliscabiei	PGPT0006115_144	1	Sturgidiscabies	PGPT0006045_611	1	Sgeranii	PGPT0004995_1298	2
BCCO_861	PGPT0004450_11927	1	Slacri	PGPT0006730_16780	1	Sreticuliscabiei	PGPT0006115_3154	1	Sturgidiscabies	PGPT0006050_401	1	Sgeranii	PGPT0004995_1387	1
BCCO_861	PGPT0004450_12363	1	Slacri	PGPT0006730_17052	1	Sreticuliscabiei	PGPT0006115_4565	1	Sturgidiscabies	PGPT0006055_279	1	Sgeranii	PGPT0004995_2016	1
BCCO_861	PGPT0004450_13985	1	Slacri	PGPT0006730_17501	1	Sreticuliscabiei	PGPT0006115_4684	1	Sturgidiscabies	PGPT0006060_564	1	Sgeranii	PGPT0004995_218	1
BCCO_861	PGPT0004450_2820	1	Slacri	PGPT0006730_18167	1	Sreticuliscabiei	PGPT0006115_5487	1	Sturgidiscabies	PGPT0006065_169	1	Sgeranii	PGPT0004995_244	1
BCCO_861	PGPT0004450_2876	1	Slacri	PGPT0006730_20053	1	Sreticuliscabiei	PGPT0006115_5691	1	Sturgidiscabies	PGPT0006070_1105	1	Sgeranii	PGPT0004995_279	1
BCCO_861	PGPT0004450_3258	1	Slacri	PGPT0006730_21788	1	Sreticuliscabiei	PGPT0006115_6097	1	Sturgidiscabies	PGPT0006070_1613	1	Sgeranii	PGPT0004995_565	1
BCCO_861	PGPT0004450_3884	1	Slacri	PGPT0006730_23946	1	Sreticuliscabiei	PGPT0006115_6520	1	Sturgidiscabies	PGPT0006070_1639	1	Sgeranii	PGPT0004995_62	1
BCCO_861	PGPT0004450_4257	1	Slacri	PGPT0006730_24085	1	Sreticuliscabiei	PGPT0006150_37	2	Sturgidiscabies	PGPT0006070_2302	1	Sgeranii	PGPT0005000_11	1
BCCO_861	PGPT0004450_5258	1	Slacri	PGPT0006730_9321	1	Sreticuliscabiei	PGPT0006170_102	1	Sturgidiscabies	PGPT0006070_453	1	Sgeranii	PGPT0005000_54	1
BCCO_861	PGPT0004450_7026	1	Slacri	PGPT0006730_9605	1	Sreticuliscabiei	PGPT0006170_276	1	Sturgidiscabies	PGPT0006070_557	1	Sgeranii	PGPT0005000_866	1
BCCO_861	PGPT0004450_9159	1	Slacri	PGPT0006730_9802	1	Sreticuliscabiei	PGPT0006170_571	1	Sturgidiscabies	PGPT0006070_588	1	Sgeranii	PGPT0005005_1036	1
BCCO_861	PGPT0004455_1072	1	Slacri	PGPT0006740_142	1	Sreticuliscabiei	PGPT0006170_635	1	Sturgidiscabies	PGPT0006075_2940	1	Sgeranii	PGPT0005005_1297	1
BCCO_861	PGPT0004455_333	1	Slacri	PGPT0006740_154	1	Sreticuliscabiei	PGPT0006170_730	1	Sturgidiscabies	PGPT0006075_3385	1	Sgeranii	PGPT0005005_1410	1
BCCO_861	PGPT0004460_42	1	Slacri	PGPT0006760_2049	1	Sreticuliscabiei	PGPT0006195_35	1	Sturgidiscabies	PGPT0006075_4658	1	Sgeranii	PGPT0005005_1476	1
BCCO_861	PGPT0004470_873	1	Slacri	PGPT0006760_3380	1	Sreticuliscabiei	PGPT0006200_415	1	Sturgidiscabies	PGPT0006075_51	1	Sgeranii	PGPT0005005_199	1
BCCO_861	PGPT0004470_890	1	Slacri	PGPT0006770_3233	1	Sreticuliscabiei	PGPT0006315_10	2	Sturgidiscabies	PGPT0006075_731	1	Sgeranii	PGPT0005005_2327	1
BCCO_861	PGPT0004495_25	1	Slacri	PGPT0006770_6454	1	Sreticuliscabiei	PGPT0006315_11	2	Sturgidiscabies	PGPT0006080_4	1	Sgeranii	PGPT0005005_4190	1
BCCO_861	PGPT0004545_149	1	Slacri	PGPT0006775_1476	1	Sreticuliscabiei	PGPT0006315_1487	1	Sturgidiscabies	PGPT0006090_694	1	Sgeranii	PGPT0005005_4191	1
BCCO_861	PGPT0004550_25	1	Slacri	PGPT0006775_2719	1	Sreticuliscabiei	PGPT0006315_1635	1	Sturgidiscabies	PGPT0006090_864	1	Sgeranii	PGPT0005005_472	1
BCCO_861	PGPT0004555_116	1	Slacri	PGPT0006786_2226	1	Sreticuliscabiei	PGPT0006315_1676	1	Sturgidiscabies	PGPT0006105_756	1	Sgeranii	PGPT0005005_59	1
BCCO_861	PGPT0004575_124	1	Slacri	PGPT0006791_79	1	Sreticuliscabiei	PGPT0006315_9	1	Sturgidiscabies	PGPT0006110_273	1	Sgeranii	PGPT0005005_770	1
BCCO_861	PGPT0004580_1007	1	Slacri	PGPT0006791_82	1	Sreticuliscabiei	PGPT0006355_1106	1	Sturgidiscabies	PGPT0006115_144	1	Sgeranii	PGPT0005010_228	1
BCCO_861	PGPT0004580_1034	1	Slacri	PGPT0006800_1327	1	Sreticuliscabiei	PGPT0006355_3524	1	Sturgidiscabies	PGPT0006115_3154	1	Sgeranii	PGPT0005015_1140	2
BCCO_861	PGPT0004585_119	1	Slacri	PGPT0006800_1614	1	Sreticuliscabiei	PGPT0006355_3613	1	Sturgidiscabies	PGPT0006115_4565	1	Sgeranii	PGPT0005015_137	1
BCCO_861	PGPT0004585_51	1	Slacri	PGPT0006800_4	1	Sreticuliscabiei	PGPT0006355_3884	1	Sturgidiscabies	PGPT0006115_4684	1	Sgeranii	PGPT0005015_958	1
BCCO_861	PGPT0004590_859	1	Slacri	PGPT0006800_789	1	Sreticuliscabiei	PGPT0006360_499	1	Sturgidiscabies	PGPT0006115_5487	1	Sgeranii	PGPT0005020_109	1
BCCO_861	PGPT0004595_102	1	Slacri	PGPT0006855_20	1	Sreticuliscabiei	PGPT0006365_1	2	Sturgidiscabies	PGPT0006115_5691	1	Sgeranii	PGPT0005020_253	1
BCCO_861	PGPT0004595_317	1	Slacri	PGPT0006875_10038	1	Sreticuliscabiei	PGPT0006365_14	1	Sturgidiscabies	PGPT0006115_6097	1	Sgeranii	PGPT0005020_54	1
BCCO_861	PGPT0004595_64	1	Slacri	PGPT0006875_3398	1	Sreticuliscabiei	PGPT0006365_1839	1	Sturgidiscabies	PGPT0006115_6520	1	Sgeranii	PGPT0005035_799	1
BCCO_861	PGPT0004605_192	1	Slacri	PGPT0006875_3879	1	Sreticuliscabiei	PGPT0006365_52	1	Sturgidiscabies	PGPT0006150_37	2	Sgeranii	PGPT0005035_810	1
BCCO_861	PGPT0004605_243	1	Slacri	PGPT0006875_4188	1	Sreticuliscabiei	PGPT0006375_1232	1	Sturgidiscabies	PGPT0006170_102	1	Sgeranii	PGPT0005055_230	1
BCCO_861	PGPT0004610_463	1	Slacri	PGPT0006875_43	1	Sreticuliscabiei	PGPT0006375_1293	1	Sturgidiscabies	PGPT0006170_276	1	Sgeranii	PGPT0005055_586	1
BCCO_861	PGPT0004615_664	1	Slacri	PGPT0006875_4680	1	Sreticuliscabiei	PGPT0006375_594	1	Sturgidiscabies	PGPT0006170_571	1	Sgeranii	PGPT0005060_271	1
BCCO_861	PGPT0004625_213	1	Slacri	PGPT0006875_5847	1	Sreticuliscabiei	PGPT0006375_602	1	Sturgidiscabies	PGPT0006170_635	1	Sgeranii	PGPT0005065_138	1
BCCO_861	PGPT0004640_542	1	Slacri	PGPT0006875_6305	1	Sreticuliscabiei	PGPT0006375_879	1	Sturgidiscabies	PGPT0006170_730	1	Sgeranii	PGPT0005065_27	1
BCCO_861	PGPT0004645_1557	1	Slacri	PGPT0006875_6844	1	Sreticuliscabiei	PGPT0006375_905	1	Sturgidiscabies	PGPT0006195_35	1	Sgeranii	PGPT0005065_724	1
BCCO_861	PGPT0004660_1910	1	Slacri	PGPT0006875_7623	1	Sreticuliscabiei	PGPT0006375_908	2	Sturgidiscabies	PGPT0006200_415	1	Sgeranii	PGPT0005110_46	1
BCCO_861	PGPT0004690_628	1	Slacri	PGPT0006875_9939	1	Sreticuliscabiei	PGPT0006375_922	1	Sturgidiscabies	PGPT0006315_10	2	Sgeranii	PGPT0005140_101	1
BCCO_861	PGPT0004690_752	1	Slacri	PGPT0006880_579	1	Sreticuliscabiei	PGPT0006470_1	1	Sturgidiscabies	PGPT0006315_11	2	Sgeranii	PGPT0005211_120	1
BCCO_861	PGPT0004695_128	1	Slacri	PGPT0006880_590	1	Sreticuliscabiei	PGPT0006535_4	1	Sturgidiscabies	PGPT0006315_1487	1	Sgeranii	PGPT0005215_29	1
BCCO_861	PGPT0004695_1371	1	Slacri	PGPT0006880_880	1	Sreticuliscabiei	PGPT0006635_2	1	Sturgidiscabies	PGPT0006315_1635	1	Sgeranii	PGPT0005220_160	1
BCCO_861	PGPT0004700_1245	1	Slacri	PGPT0006885_3093	1	Sreticuliscabiei	PGPT0006640_13	1	Sturgidiscabies	PGPT0006315_1676	1	Sgeranii	PGPT0005220_187	1
BCCO_861	PGPT0004700_2177	1	Slacri	PGPT0006950_61	1	Sreticuliscabiei	PGPT0006645_260	1	Sturgidiscabies	PGPT0006315_9	2	Sgeranii	PGPT0005220_350	1
BCCO_861	PGPT0004700_2252	1	Slacri	PGPT0006995_90	1	Sreticuliscabiei	PGPT0006645_649	1	Sturgidiscabies	PGPT0006355_1106	1	Sgeranii	PGPT0005225_66	1
BCCO_861	PGPT0004705_38	1	Slacri	PGPT0007070_1300	1	Sreticuliscabiei	PGPT0006645_990	1	Sturgidiscabies	PGPT0006355_3606	1	Sgeranii	PGPT0005230_2	1
BCCO_861	PGPT0004710_747	1	Slacri	PGPT0007075_598	1	Sreticuliscabiei	PGPT0006655_320	1	Sturgidiscabies	PGPT0006355_3884	1	Sgeranii	PGPT0005260_194	1
BCCO_861	PGPT0004715_2794	1	Slacri	PGPT0007080_1541	1	Sreticuliscabiei	PGPT0006655_348	1	Sturgidiscabies	PGPT0006360_499	1	Sgeranii	PGPT0005260_318	1
BCCO_861	PGPT0004720_943	1	Slacri	PGPT0007090_2	1	Sreticuliscabiei	PGPT0006665_354	1	Sturgidiscabies	PGPT0006365_1	2	Sgeranii	PGPT0005265_10	1
BCCO_861	PGPT0004735_2000	1	Slacri	PGPT0007090_816	1	Sreticuliscabiei	PGPT0006670_116	1	Sturgidiscabies	PGPT0006365_14	1	Sgeranii	PGPT0005265_153	1
BCCO_861	PGPT0004735_4430	1	Slacri	PGPT0007095_1	2	Sreticuliscabiei	PGPT0006670_204	1	Sturgidiscabies	PGPT0006365_1839	1	Sgeranii	PGPT0005265_21	1
BCCO_861	PGPT0004735_5124	1	Slacri	PGPT0007095_3401	1	Sreticuliscabiei	PGPT0006680_192	1	Sturgidiscabies	PGPT0006365_52	1	Sgeranii	PGPT0005270_43	1
BCCO_861	PGPT0004735_5248	1	Slacri	PGPT0007105_154	3	Sreticuliscabiei	PGPT0006680_741	1	Sturgidiscabies	PGPT0006375_1232	2	Sgeranii	PGPT0005280_281	1
BCCO_861	PGPT0004735_738	2	Slacri	PGPT0007120_3263	1	Sreticuliscabiei	PGPT0006685_546	1	Sturgidiscabies	PGPT0006375_1293	1	Sgeranii	PGPT0005285_36	1
BCCO_861	PGPT0004735_778	1	Slacri	PGPT0007120_3730	1	Sreticuliscabiei	PGPT0006690_72	1	Sturgidiscabies	PGPT0006375_594	1	Sgeranii	PGPT0005290_105	1
BCCO_861	PGPT0004750_1231	1	Slacri	PGPT0007135_843	1	Sreticuliscabiei	PGPT0006695_164	1	Sturgidiscabies	PGPT0006375_602	1	Sgeranii	PGPT0005315_201	1
BCCO_861	PGPT0004750_1257	1	Slacri	PGPT0007140_867	1	Sreticuliscabiei	PGPT0006695_425	1	Sturgidiscabies	PGPT0006375_908	1	Sgeranii	PGPT0005315_33	1
BCCO_861	PGPT0004750_1261	1	Slacri	PGPT0007145_40	1	Sreticuliscabiei	PGPT0006695_508	1	Sturgidiscabies	PGPT0006375_922	1	Sgeranii	PGPT0005315_4	1
BCCO_861	PGPT0004750_1404	1	Slacri	PGPT0007155_333	1	Sreticuliscabiei	PGPT0006700_100	1	Sturgidiscabies	PGPT0006375_957	1	Sgeranii	PGPT0005315_521	1
BCCO_861	PGPT0004760_1133	1	Slacri	PGPT0007155_359	1	Sreticuliscabiei	PGPT0006700_111	1	Sturgidiscabies	PGPT0006470_1	1	Sgeranii	PGPT0005315_535	1
BCCO_861	PGPT0004760_2046	1	Slacri	PGPT0007155_460	1	Sreticuliscabiei	PGPT0006700_175	1	Sturgidiscabies	PGPT0006535_4	1	Sgeranii	PGPT0005315_708	1
BCCO_861	PGPT0004770_886	1	Slacri	PGPT0007165_1996	1	Sreticuliscabiei	PGPT0006700_387	1	Sturgidiscabies	PGPT0006635_2	1	Sgeranii	PGPT0005315_713	1
BCCO_861	PGPT0004790_238	1	Slacri	PGPT0007165_2	1	Sreticuliscabiei	PGPT0006705_351	1	Sturgidiscabies	PGPT0006640_13	1	Sgeranii	PGPT0005315_818	1
BCCO_861	PGPT0004825_318	1	Slacri	PGPT0007165_218	1	Sreticuliscabiei	PGPT0006710_134	1	Sturgidiscabies	PGPT0006645_260	1	Sgeranii	PGPT0005390_497	1
BCCO_861	PGPT0004890_22	1	Slacri	PGPT0007165_2377	1	Sreticuliscabiei	PGPT0006715_139	1	Sturgidiscabies	PGPT0006645_649	1	Sgeranii	PGPT0005405_428	1
BCCO_861	PGPT0004890_272	1	Slacri	PGPT0007165_2856	1	Sreticuliscabiei	PGPT0006715_214	1	Sturgidiscabies	PGPT0006645_990	1	Sgeranii	PGPT0005425_227	1
BCCO_861	PGPT0004890_735	1	Slacri	PGPT0007176_1	2	Sreticuliscabiei	PGPT0006715_424	1	Sturgidiscabies	PGPT0006655_320	1	Sgeranii	PGPT0005470_43	1
BCCO_861	PGPT0004895_110	1	Slacri	PGPT0007176_745	1	Sreticuliscabiei	PGPT0006725_11109	1	Sturgidiscabies	PGPT0006655_348	1	Sgeranii	PGPT0005475_1	1
BCCO_861	PGPT0004895_193	1	Slacri	PGPT0007180_1031	1	Sreticuliscabiei	PGPT0006725_11759	1	Sturgidiscabies	PGPT0006665_354	1	Sgeranii	PGPT0005490_183	1
BCCO_861	PGPT0004895_213	1	Slacri	PGPT0007180_135	1	Sreticuliscabiei	PGPT0006725_12463	1	Sturgidiscabies	PGPT0006670_116	1	Sgeranii	PGPT0005495_98	1
BCCO_861	PGPT0004895_234	1	Slacri	PGPT0007180_740	1	Sreticuliscabiei	PGPT0006725_13267	1	Sturgidiscabies	PGPT0006670_204	1	Sgeranii	PGPT0005515_4	1
BCCO_861	PGPT0004895_286	1	Slacri	PGPT0007180_948	1	Sreticuliscabiei	PGPT0006725_13697	1	Sturgidiscabies	PGPT0006680_192	1	Sgeranii	PGPT0005570_502	1
BCCO_861	PGPT0004895_368	1	Slacri	PGPT0007210_3040	1	Sreticuliscabiei	PGPT0006725_14026	1	Sturgidiscabies	PGPT0006680_741	1	Sgeranii	PGPT0005575_246	1
BCCO_861	PGPT0004895_48	1	Slacri	PGPT0007215_657	1	Sreticuliscabiei	PGPT0006725_16788	1	Sturgidiscabies	PGPT0006680_878	1	Sgeranii	PGPT0005575_429	1
BCCO_861	PGPT0004900_137	1	Slacri	PGPT0007215_848	1	Sreticuliscabiei	PGPT0006725_172	1	Sturgidiscabies	PGPT0006685_546	1	Sgeranii	PGPT0005575_611	1
BCCO_861	PGPT0004905_1189	1	Slacri	PGPT0007225_1006	1	Sreticuliscabiei	PGPT0006725_18306	1	Sturgidiscabies	PGPT0006690_72	1	Sgeranii	PGPT0005685_2498	1
BCCO_861	PGPT0004905_1447	1	Slacri	PGPT0007230_1400	1	Sreticuliscabiei	PGPT0006725_192	1	Sturgidiscabies	PGPT0006695_164	1	Sgeranii	PGPT0005685_2501	2
BCCO_861	PGPT0004905_1816	1	Slacri	PGPT0007235_782	1	Sreticuliscabiei	PGPT0006725_19841	1	Sturgidiscabies	PGPT0006695_425	1	Sgeranii	PGPT0005685_3609	1
BCCO_861	PGPT0004910_1377	1	Slacri	PGPT0007240_96	1	Sreticuliscabiei	PGPT0006725_20450	1	Sturgidiscabies	PGPT0006695_508	1	Sgeranii	PGPT0005685_4642	1
BCCO_861	PGPT0004910_1385	1	Slacri	PGPT0007245_2934	1	Sreticuliscabiei	PGPT0006725_21449	1	Sturgidiscabies	PGPT0006700_100	1	Sgeranii	PGPT0005685_4644	4
BCCO_861	PGPT0004910_640	1	Slacri	PGPT0007245_870	1	Sreticuliscabiei	PGPT0006725_21724	2	Sturgidiscabies	PGPT0006700_111	1	Sgeranii	PGPT0005825_47	1
BCCO_861	PGPT0004910_745	1	Slacri	PGPT0007250_1019	1	Sreticuliscabiei	PGPT0006725_22197	1	Sturgidiscabies	PGPT0006700_175	1	Sgeranii	PGPT0005825_60	1
BCCO_861	PGPT0004910_811	1	Slacri	PGPT0007250_1106	1	Sreticuliscabiei	PGPT0006725_22199	1	Sturgidiscabies	PGPT0006700_387	1	Sgeranii	PGPT0005865_315	1
BCCO_861	PGPT0004910_862	1	Slacri	PGPT0007260_1055	1	Sreticuliscabiei	PGPT0006725_2349	1	Sturgidiscabies	PGPT0006705_351	1	Sgeranii	PGPT0005915_174	1
BCCO_861	PGPT0004910_880	1	Slacri	PGPT0007265_1031	2	Sreticuliscabiei	PGPT0006725_3164	1	Sturgidiscabies	PGPT0006710_134	1	Sgeranii	PGPT0005930_266	1
BCCO_861	PGPT0004915_245	1	Slacri	PGPT0007275_1045	1	Sreticuliscabiei	PGPT0006725_361	2	Sturgidiscabies	PGPT0006715_139	1	Sgeranii	PGPT0005930_2834	1
BCCO_861	PGPT0004915_330	1	Slacri	PGPT0007280_1	1	Sreticuliscabiei	PGPT0006725_368	1	Sturgidiscabies	PGPT0006715_214	1	Sgeranii	PGPT0006005_111	1
BCCO_861	PGPT0004925_348	1	Slacri	PGPT0007280_384	1	Sreticuliscabiei	PGPT0006725_3985	1	Sturgidiscabies	PGPT0006715_424	1	Sgeranii	PGPT0006005_138	1
BCCO_861	PGPT0004960_1921	1	Slacri	PGPT0007280_721	1	Sreticuliscabiei	PGPT0006725_4013	1	Sturgidiscabies	PGPT0006725_11109	1	Sgeranii	PGPT0006010_283	1
BCCO_861	PGPT0004985_661	1	Slacri	PGPT0007280_817	1	Sreticuliscabiei	PGPT0006725_4037	1	Sturgidiscabies	PGPT0006725_11759	1	Sgeranii	PGPT0006010_97	1
BCCO_861	PGPT0004995_1025	1	Slacri	PGPT0007290_327	1	Sreticuliscabiei	PGPT0006725_4242	1	Sturgidiscabies	PGPT0006725_12463	1	Sgeranii	PGPT0006025_280	1
BCCO_861	PGPT0004995_1259	1	Slacri	PGPT0007295_1083	1	Sreticuliscabiei	PGPT0006725_5450	1	Sturgidiscabies	PGPT0006725_13267	1	Sgeranii	PGPT0006035_19	1
BCCO_861	PGPT0004995_1387	1	Slacri	PGPT0007300_807	1	Sreticuliscabiei	PGPT0006725_553	1	Sturgidiscabies	PGPT0006725_13697	1	Sgeranii	PGPT0006035_777	1
BCCO_861	PGPT0004995_1459	2	Slacri	PGPT0007325_1235	1	Sreticuliscabiei	PGPT0006725_57	1	Sturgidiscabies	PGPT0006725_14026	1	Sgeranii	PGPT0006045_611	1
BCCO_861	PGPT0004995_2226	1	Slacri	PGPT0007325_1352	1	Sreticuliscabiei	PGPT0006725_6469	1	Sturgidiscabies	PGPT0006725_16788	1	Sgeranii	PGPT0006050_391	1
BCCO_861	PGPT0004995_2380	1	Slacri	PGPT0007325_1972	1	Sreticuliscabiei	PGPT0006725_6517	1	Sturgidiscabies	PGPT0006725_172	1	Sgeranii	PGPT0006055_279	1
BCCO_861	PGPT0004995_460	1	Slacri	PGPT0007330_376	1	Sreticuliscabiei	PGPT0006725_6602	1	Sturgidiscabies	PGPT0006725_18306	1	Sgeranii	PGPT0006060_335	1
BCCO_861	PGPT0004995_511	1	Slacri	PGPT0007360_1030	1	Sreticuliscabiei	PGPT0006725_684	1	Sturgidiscabies	PGPT0006725_192	1	Sgeranii	PGPT0006065_169	1
BCCO_861	PGPT0004995_512	1	Slacri	PGPT0007360_1479	1	Sreticuliscabiei	PGPT0006725_8272	1	Sturgidiscabies	PGPT0006725_19841	1	Sgeranii	PGPT0006070_1639	1
BCCO_861	PGPT0004995_565	1	Slacri	PGPT0007360_195	1	Sreticuliscabiei	PGPT0006725_8624	1	Sturgidiscabies	PGPT0006725_20450	2	Sgeranii	PGPT0006070_1683	1
BCCO_861	PGPT0004995_62	2	Slacri	PGPT0007360_2115	1	Sreticuliscabiei	PGPT0006725_9000	1	Sturgidiscabies	PGPT0006725_21026	1	Sgeranii	PGPT0006070_2302	1
BCCO_861	PGPT0004995_690	1	Slacri	PGPT0007360_2884	1	Sreticuliscabiei	PGPT0006725_9823	1	Sturgidiscabies	PGPT0006725_21724	2	Sgeranii	PGPT0006070_453	1
BCCO_861	PGPT0004995_849	1	Slacri	PGPT0007360_47	1	Sreticuliscabiei	PGPT0006730_10822	1	Sturgidiscabies	PGPT0006725_22197	1	Sgeranii	PGPT0006070_5	1
BCCO_861	PGPT0005000_46	1	Slacri	PGPT0007375_1256	1	Sreticuliscabiei	PGPT0006730_10956	1	Sturgidiscabies	PGPT0006725_22199	1	Sgeranii	PGPT0006070_588	1
BCCO_861	PGPT0005000_54	1	Slacri	PGPT0007375_2	1	Sreticuliscabiei	PGPT0006730_11579	1	Sturgidiscabies	PGPT0006725_2349	1	Sgeranii	PGPT0006070_661	1
BCCO_861	PGPT0005000_867	1	Slacri	PGPT0007375_7	1	Sreticuliscabiei	PGPT0006730_11869	1	Sturgidiscabies	PGPT0006725_3164	1	Sgeranii	PGPT0006075_2654	1
BCCO_861	PGPT0005005_115	1	Slacri	PGPT0007375_847	1	Sreticuliscabiei	PGPT0006730_12014	1	Sturgidiscabies	PGPT0006725_361	3	Sgeranii	PGPT0006075_3385	1
BCCO_861	PGPT0005005_1392	1	Slacri	PGPT0007385_93	1	Sreticuliscabiei	PGPT0006730_12454	1	Sturgidiscabies	PGPT0006725_368	1	Sgeranii	PGPT0006075_4496	1
BCCO_861	PGPT0005005_2905	1	Slacri	PGPT0007400_235	1	Sreticuliscabiei	PGPT0006730_12987	1	Sturgidiscabies	PGPT0006725_3985	1	Sgeranii	PGPT0006075_51	1
BCCO_861	PGPT0005005_555	1	Slacri	PGPT0007455_123	1	Sreticuliscabiei	PGPT0006730_13071	1	Sturgidiscabies	PGPT0006725_4013	1	Sgeranii	PGPT0006075_734	1
BCCO_861	PGPT0005005_869	1	Slacri	PGPT0007475_215	1	Sreticuliscabiei	PGPT0006730_1318	1	Sturgidiscabies	PGPT0006725_4037	1	Sgeranii	PGPT0006080_4	1
BCCO_861	PGPT0005010_228	1	Slacri	PGPT0007495_6	1	Sreticuliscabiei	PGPT0006730_1381	1	Sturgidiscabies	PGPT0006725_4242	1	Sgeranii	PGPT0006090_415	1
BCCO_861	PGPT0005015_1140	1	Slacri	PGPT0007525_630	1	Sreticuliscabiei	PGPT0006730_14418	1	Sturgidiscabies	PGPT0006725_5450	1	Sgeranii	PGPT0006090_635	1
BCCO_861	PGPT0005015_137	1	Slacri	PGPT0007525_749	1	Sreticuliscabiei	PGPT0006730_14944	1	Sturgidiscabies	PGPT0006725_553	1	Sgeranii	PGPT0006090_872	1
BCCO_861	PGPT0005015_185	1	Slacri	PGPT0007530_2188	1	Sreticuliscabiei	PGPT0006730_15687	1	Sturgidiscabies	PGPT0006725_57	1	Sgeranii	PGPT0006105_756	1
BCCO_861	PGPT0005020_109	1	Slacri	PGPT0007530_2948	1	Sreticuliscabiei	PGPT0006730_15699	1	Sturgidiscabies	PGPT0006725_6216	1	Sgeranii	PGPT0006110_273	1
BCCO_861	PGPT0005020_253	1	Slacri	PGPT0007535_411	1	Sreticuliscabiei	PGPT0006730_16190	1	Sturgidiscabies	PGPT0006725_6517	1	Sgeranii	PGPT0006115_144	1
BCCO_861	PGPT0005020_43	1	Slacri	PGPT0007550_1124	1	Sreticuliscabiei	PGPT0006730_16694	1	Sturgidiscabies	PGPT0006725_684	1	Sgeranii	PGPT0006115_4911	1
BCCO_861	PGPT0005025_299	1	Slacri	PGPT0007550_1338	1	Sreticuliscabiei	PGPT0006730_17260	1	Sturgidiscabies	PGPT0006725_8272	2	Sgeranii	PGPT0006115_5025	1
BCCO_861	PGPT0005030_166	1	Slacri	PGPT0007550_1572	1	Sreticuliscabiei	PGPT0006730_17364	1	Sturgidiscabies	PGPT0006725_8624	1	Sgeranii	PGPT0006115_6097	1
BCCO_861	PGPT0005045_451	1	Slacri	PGPT0007550_335	1	Sreticuliscabiei	PGPT0006730_18374	1	Sturgidiscabies	PGPT0006725_9000	1	Sgeranii	PGPT0006115_7268	1
BCCO_861	PGPT0005055_168	1	Slacri	PGPT0007550_66	1	Sreticuliscabiei	PGPT0006730_20717	1	Sturgidiscabies	PGPT0006725_9823	1	Sgeranii	PGPT0006115_814	1
BCCO_861	PGPT0005055_586	1	Slacri	PGPT0007550_747	2	Sreticuliscabiei	PGPT0006730_23186	1	Sturgidiscabies	PGPT0006730_10822	1	Sgeranii	PGPT0006150_37	2
BCCO_861	PGPT0005060_237	2	Slacri	PGPT0007550_873	1	Sreticuliscabiei	PGPT0006730_23683	1	Sturgidiscabies	PGPT0006730_10956	1	Sgeranii	PGPT0006170_224	1
BCCO_861	PGPT0005060_238	1	Slacri	PGPT0007555_396	1	Sreticuliscabiei	PGPT0006730_24019	1	Sturgidiscabies	PGPT0006730_11579	1	Sgeranii	PGPT0006170_276	1
BCCO_861	PGPT0005060_526	1	Slacri	PGPT0007580_1847	1	Sreticuliscabiei	PGPT0006730_9321	1	Sturgidiscabies	PGPT0006730_11869	1	Sgeranii	PGPT0006170_359	1
BCCO_861	PGPT0005060_547	1	Slacri	PGPT0007580_1898	1	Sreticuliscabiei	PGPT0006730_9488	1	Sturgidiscabies	PGPT0006730_12014	1	Sgeranii	PGPT0006170_504	1
BCCO_861	PGPT0005065_138	1	Slacri	PGPT0007585_117	1	Sreticuliscabiei	PGPT0006735_53	1	Sturgidiscabies	PGPT0006730_12454	1	Sgeranii	PGPT0006170_550	1
BCCO_861	PGPT0005065_726	1	Slacri	PGPT0007590_534	1	Sreticuliscabiei	PGPT0006735_64	1	Sturgidiscabies	PGPT0006730_12987	1	Sgeranii	PGPT0006170_571	1
BCCO_861	PGPT0005070_241	1	Slacri	PGPT0007595_283	1	Sreticuliscabiei	PGPT0006740_142	1	Sturgidiscabies	PGPT0006730_13071	1	Sgeranii	PGPT0006180_2	1
BCCO_861	PGPT0005075_182	1	Slacri	PGPT0007595_7	1	Sreticuliscabiei	PGPT0006760_2049	1	Sturgidiscabies	PGPT0006730_1318	2	Sgeranii	PGPT0006195_35	1
BCCO_861	PGPT0005110_1	1	Slacri	PGPT0007605_1267	1	Sreticuliscabiei	PGPT0006760_3380	1	Sturgidiscabies	PGPT0006730_1381	1	Sgeranii	PGPT0006215_3	1
BCCO_861	PGPT0005110_38	1	Slacri	PGPT0007605_19	1	Sreticuliscabiei	PGPT0006770_2803	1	Sturgidiscabies	PGPT0006730_14418	1	Sgeranii	PGPT0006315_10	1
BCCO_861	PGPT0005125_1	1	Slacri	PGPT0007615_15	1	Sreticuliscabiei	PGPT0006770_3178	1	Sturgidiscabies	PGPT0006730_14944	1	Sgeranii	PGPT0006315_11	2
BCCO_861	PGPT0005140_118	1	Slacri	PGPT0007615_386	1	Sreticuliscabiei	PGPT0006770_6454	1	Sturgidiscabies	PGPT0006730_15699	1	Sgeranii	PGPT0006315_1630	1
BCCO_861	PGPT0005210_943	1	Slacri	PGPT0007615_55	1	Sreticuliscabiei	PGPT0006775_1476	1	Sturgidiscabies	PGPT0006730_16190	1	Sgeranii	PGPT0006355_3606	1
BCCO_861	PGPT0005211_282	1	Slacri	PGPT0007615_743	1	Sreticuliscabiei	PGPT0006775_2719	1	Sturgidiscabies	PGPT0006730_16694	1	Sgeranii	PGPT0006355_3864	1
BCCO_861	PGPT0005215_134	2	Slacri	PGPT0007625_31	1	Sreticuliscabiei	PGPT0006786_1631	1	Sturgidiscabies	PGPT0006730_16735	1	Sgeranii	PGPT0006365_1	1
BCCO_861	PGPT0005215_224	1	Slacri	PGPT0007630_1385	1	Sreticuliscabiei	PGPT0006800_1327	1	Sturgidiscabies	PGPT0006730_17364	1	Sgeranii	PGPT0006365_1949	1
BCCO_861	PGPT0005215_316	1	Slacri	PGPT0007637_20	1	Sreticuliscabiei	PGPT0006800_1614	1	Sturgidiscabies	PGPT0006730_18369	1	Sgeranii	PGPT0006365_52	1
BCCO_861	PGPT0005215_342	1	Slacri	PGPT0007637_388	1	Sreticuliscabiei	PGPT0006800_4	1	Sturgidiscabies	PGPT0006730_18374	1	Sgeranii	PGPT0006375_1232	1
BCCO_861	PGPT0005215_358	1	Slacri	PGPT0007638_432	1	Sreticuliscabiei	PGPT0006800_789	1	Sturgidiscabies	PGPT0006730_20717	1	Sgeranii	PGPT0006375_1293	1
BCCO_861	PGPT0005215_86	1	Slacri	PGPT0007638_495	1	Sreticuliscabiei	PGPT0006855_314	1	Sturgidiscabies	PGPT0006730_23186	1	Sgeranii	PGPT0006375_381	1
BCCO_861	PGPT0005220_338	1	Slacri	PGPT0007638_805	1	Sreticuliscabiei	PGPT0006855_80	1	Sturgidiscabies	PGPT0006730_23683	1	Sgeranii	PGPT0006375_594	1
BCCO_861	PGPT0005220_363	1	Slacri	PGPT0007641_45	1	Sreticuliscabiei	PGPT0006875_10019	1	Sturgidiscabies	PGPT0006730_24019	1	Sgeranii	PGPT0006375_908	1
BCCO_861	PGPT0005230_2	1	Slacri	PGPT0007641_71	1	Sreticuliscabiei	PGPT0006875_10038	1	Sturgidiscabies	PGPT0006730_9321	1	Sgeranii	PGPT0006375_916	1
BCCO_861	PGPT0005260_313	1	Slacri	PGPT0007660_740	1	Sreticuliscabiei	PGPT0006875_2589	1	Sturgidiscabies	PGPT0006730_9488	1	Sgeranii	PGPT0006375_922	1
BCCO_861	PGPT0005260_318	1	Slacri	PGPT0007665_68	1	Sreticuliscabiei	PGPT0006875_43	1	Sturgidiscabies	PGPT0006735_53	1	Sgeranii	PGPT0006375_957	1
BCCO_861	PGPT0005270_32	2	Slacri	PGPT0007680_1033	1	Sreticuliscabiei	PGPT0006875_4614	1	Sturgidiscabies	PGPT0006735_64	1	Sgeranii	PGPT0006540_51	1
BCCO_861	PGPT0005270_38	1	Slacri	PGPT0007680_1917	1	Sreticuliscabiei	PGPT0006875_4680	1	Sturgidiscabies	PGPT0006740_142	1	Sgeranii	PGPT0006545_81	1
BCCO_861	PGPT0005280_105	1	Slacri	PGPT0007680_209	1	Sreticuliscabiei	PGPT0006875_5765	1	Sturgidiscabies	PGPT0006760_2049	1	Sgeranii	PGPT0006635_129	1
BCCO_861	PGPT0005285_189	1	Slacri	PGPT0007680_2636	1	Sreticuliscabiei	PGPT0006875_5847	1	Sturgidiscabies	PGPT0006760_3380	1	Sgeranii	PGPT0006635_2	1
BCCO_861	PGPT0005285_36	2	Slacri	PGPT0007680_596	1	Sreticuliscabiei	PGPT0006875_6305	1	Sturgidiscabies	PGPT0006770_2803	1	Sgeranii	PGPT0006640_13	1
BCCO_861	PGPT0005315_238	1	Slacri	PGPT0007680_7	1	Sreticuliscabiei	PGPT0006875_6844	1	Sturgidiscabies	PGPT0006770_3178	1	Sgeranii	PGPT0006645_225	1
BCCO_861	PGPT0005315_29	1	Slacri	PGPT0007685_795	1	Sreticuliscabiei	PGPT0006875_7623	1	Sturgidiscabies	PGPT0006770_6454	1	Sgeranii	PGPT0006655_320	1
BCCO_861	PGPT0005315_408	1	Slacri	PGPT0007695_678	1	Sreticuliscabiei	PGPT0006875_8724	1	Sturgidiscabies	PGPT0006775_1476	1	Sgeranii	PGPT0006655_348	1
BCCO_861	PGPT0005315_433	1	Slacri	PGPT0007700_4317	1	Sreticuliscabiei	PGPT0006875_9176	2	Sturgidiscabies	PGPT0006775_2719	1	Sgeranii	PGPT0006655_53	1
BCCO_861	PGPT0005315_572	1	Slacri	PGPT0007705_799	1	Sreticuliscabiei	PGPT0006875_9940	1	Sturgidiscabies	PGPT0006786_1631	1	Sgeranii	PGPT0006660_18	1
BCCO_861	PGPT0005315_628	1	Slacri	PGPT0007705_809	1	Sreticuliscabiei	PGPT0006880_590	1	Sturgidiscabies	PGPT0006800_1327	1	Sgeranii	PGPT0006660_68	1
BCCO_861	PGPT0005380_41	2	Slacri	PGPT0007725_4778	1	Sreticuliscabiei	PGPT0006880_608	1	Sturgidiscabies	PGPT0006800_1614	1	Sgeranii	PGPT0006670_116	1
BCCO_861	PGPT0005380_64	1	Slacri	PGPT0007735_1096	1	Sreticuliscabiei	PGPT0006950_1	1	Sturgidiscabies	PGPT0006800_4	1	Sgeranii	PGPT0006670_204	1
BCCO_861	PGPT0005380_8	1	Slacri	PGPT0007750_1557	1	Sreticuliscabiei	PGPT0006950_98	1	Sturgidiscabies	PGPT0006800_789	1	Sgeranii	PGPT0006680_192	1
BCCO_861	PGPT0005390_711	1	Slacri	PGPT0007750_376	1	Sreticuliscabiei	PGPT0006995_90	1	Sturgidiscabies	PGPT0006855_314	1	Sgeranii	PGPT0006680_741	1
BCCO_861	PGPT0005405_426	1	Slacri	PGPT0007750_3818	1	Sreticuliscabiei	PGPT0007070_1264	1	Sturgidiscabies	PGPT0006855_80	1	Sgeranii	PGPT0006680_758	1
BCCO_861	PGPT0005405_427	1	Slacri	PGPT0007750_899	1	Sreticuliscabiei	PGPT0007075_626	1	Sturgidiscabies	PGPT0006875_10019	1	Sgeranii	PGPT0006690_72	1
BCCO_861	PGPT0005425_227	1	Slacri	PGPT0007775_1266	1	Sreticuliscabiei	PGPT0007080_1541	1	Sturgidiscabies	PGPT0006875_2589	1	Sgeranii	PGPT0006695_425	1
BCCO_861	PGPT0005425_255	1	Slacri	PGPT0007790_1737	1	Sreticuliscabiei	PGPT0007090_2	1	Sturgidiscabies	PGPT0006875_4188	1	Sgeranii	PGPT0006695_657	1
BCCO_861	PGPT0005470_43	1	Slacri	PGPT0007790_361	1	Sreticuliscabiei	PGPT0007090_630	1	Sturgidiscabies	PGPT0006875_43	1	Sgeranii	PGPT0006700_135	1
BCCO_861	PGPT0005490_153	1	Slacri	PGPT0007790_653	1	Sreticuliscabiei	PGPT0007090_816	1	Sturgidiscabies	PGPT0006875_4614	1	Sgeranii	PGPT0006700_171	1
BCCO_861	PGPT0005490_183	1	Slacri	PGPT0007790_846	1	Sreticuliscabiei	PGPT0007095_1	2	Sturgidiscabies	PGPT0006875_4680	1	Sgeranii	PGPT0006700_347	1
BCCO_861	PGPT0005495_63	1	Slacri	PGPT0007795_282	1	Sreticuliscabiei	PGPT0007095_2349	1	Sturgidiscabies	PGPT0006875_5847	1	Sgeranii	PGPT0006700_384	1
BCCO_861	PGPT0005495_72	1	Slacri	PGPT0007825_265	1	Sreticuliscabiei	PGPT0007095_3403	1	Sturgidiscabies	PGPT0006875_6305	1	Sgeranii	PGPT0006700_387	1
BCCO_861	PGPT0005495_81	1	Slacri	PGPT0007830_1495	1	Sreticuliscabiei	PGPT0007105_154	3	Sturgidiscabies	PGPT0006875_6844	1	Sgeranii	PGPT0006705_351	1
BCCO_861	PGPT0005495_87	1	Slacri	PGPT0007835_343	1	Sreticuliscabiei	PGPT0007105_1856	1	Sturgidiscabies	PGPT0006875_7623	1	Sgeranii	PGPT0006710_153	1
BCCO_861	PGPT0005500_42	1	Slacri	PGPT0007840_341	1	Sreticuliscabiei	PGPT0007120_3263	1	Sturgidiscabies	PGPT0006875_8724	2	Sgeranii	PGPT0006715_139	1
BCCO_861	PGPT0005525_12	1	Slacri	PGPT0007845_2407	1	Sreticuliscabiei	PGPT0007120_4164	1	Sturgidiscabies	PGPT0006875_9940	1	Sgeranii	PGPT0006715_214	1
BCCO_861	PGPT0005525_13	2	Slacri	PGPT0007850_1785	1	Sreticuliscabiei	PGPT0007135_14	1	Sturgidiscabies	PGPT0006880_590	1	Sgeranii	PGPT0006715_424	1
BCCO_861	PGPT0005570_473	1	Slacri	PGPT0007855_1470	1	Sreticuliscabiei	PGPT0007135_843	1	Sturgidiscabies	PGPT0006880_608	1	Sgeranii	PGPT0006725_11109	1
BCCO_861	PGPT0005575_134	1	Slacri	PGPT0007855_660	1	Sreticuliscabiei	PGPT0007140_867	1	Sturgidiscabies	PGPT0006885_2270	1	Sgeranii	PGPT0006725_11759	1
BCCO_861	PGPT0005575_429	1	Slacri	PGPT0007860_2786	1	Sreticuliscabiei	PGPT0007145_40	1	Sturgidiscabies	PGPT0006885_2734	1	Sgeranii	PGPT0006725_12463	1
BCCO_861	PGPT0005575_535	1	Slacri	PGPT0007865_799	1	Sreticuliscabiei	PGPT0007155_333	1	Sturgidiscabies	PGPT0006950_1	1	Sgeranii	PGPT0006725_13697	1
BCCO_861	PGPT0005575_538	1	Slacri	PGPT0007865_907	1	Sreticuliscabiei	PGPT0007155_448	1	Sturgidiscabies	PGPT0006950_98	1	Sgeranii	PGPT0006725_142	1
BCCO_861	PGPT0005575_611	1	Slacri	PGPT0007875_2997	1	Sreticuliscabiei	PGPT0007155_64	1	Sturgidiscabies	PGPT0006995_90	1	Sgeranii	PGPT0006725_14285	1
BCCO_861	PGPT0005685_2535	1	Slacri	PGPT0007885_110	1	Sreticuliscabiei	PGPT0007155_7	1	Sturgidiscabies	PGPT0007070_1264	1	Sgeranii	PGPT0006725_14519	1
BCCO_861	PGPT0005685_3390	1	Slacri	PGPT0007905_2497	1	Sreticuliscabiei	PGPT0007165_2	1	Sturgidiscabies	PGPT0007070_860	1	Sgeranii	PGPT0006725_17192	1
BCCO_861	PGPT0005685_3645	1	Slacri	PGPT0007910_145	1	Sreticuliscabiei	PGPT0007165_218	1	Sturgidiscabies	PGPT0007075_626	1	Sgeranii	PGPT0006725_18298	1
BCCO_861	PGPT0005745_1	1	Slacri	PGPT0007915_1023	1	Sreticuliscabiei	PGPT0007165_2377	1	Sturgidiscabies	PGPT0007080_1541	1	Sgeranii	PGPT0006725_19841	1
BCCO_861	PGPT0005825_47	1	Slacri	PGPT0007915_2295	1	Sreticuliscabiei	PGPT0007165_2856	1	Sturgidiscabies	PGPT0007090_2	1	Sgeranii	PGPT0006725_20904	1
BCCO_861	PGPT0005865_222	1	Slacri	PGPT0007975_327	1	Sreticuliscabiei	PGPT0007165_3211	1	Sturgidiscabies	PGPT0007090_630	1	Sgeranii	PGPT0006725_2132	1
BCCO_861	PGPT0005865_338	1	Slacri	PGPT0007980_4	1	Sreticuliscabiei	PGPT0007165_586	1	Sturgidiscabies	PGPT0007090_816	1	Sgeranii	PGPT0006725_21444	1
BCCO_861	PGPT0005865_588	1	Slacri	PGPT0007985_991	1	Sreticuliscabiei	PGPT0007176_1	2	Sturgidiscabies	PGPT0007095_1	2	Sgeranii	PGPT0006725_21516	1
BCCO_861	PGPT0005915_120	1	Slacri	PGPT0007990_324	1	Sreticuliscabiei	PGPT0007176_745	1	Sturgidiscabies	PGPT0007095_2349	1	Sgeranii	PGPT0006725_21724	1
BCCO_861	PGPT0005915_171	1	Slacri	PGPT0007990_4505	1	Sreticuliscabiei	PGPT0007180_1031	1	Sturgidiscabies	PGPT0007095_3403	1	Sgeranii	PGPT0006725_22197	1
BCCO_861	PGPT0005915_227	2	Slacri	PGPT0007990_810	1	Sreticuliscabiei	PGPT0007180_327	1	Sturgidiscabies	PGPT0007105_154	2	Sgeranii	PGPT0006725_2349	1
BCCO_861	PGPT0005915_368	1	Slacri	PGPT0008000_476	1	Sreticuliscabiei	PGPT0007180_672	1	Sturgidiscabies	PGPT0007105_1856	1	Sgeranii	PGPT0006725_361	3
BCCO_861	PGPT0005915_536	1	Slacri	PGPT0008005_2302	1	Sreticuliscabiei	PGPT0007210_3040	1	Sturgidiscabies	PGPT0007120_3263	1	Sgeranii	PGPT0006725_368	1
BCCO_861	PGPT0005930_2305	1	Slacri	PGPT0008010_167	1	Sreticuliscabiei	PGPT0007210_3525	1	Sturgidiscabies	PGPT0007120_4164	1	Sgeranii	PGPT0006725_421	1
BCCO_861	PGPT0005930_2834	1	Slacri	PGPT0008010_18	1	Sreticuliscabiei	PGPT0007215_657	1	Sturgidiscabies	PGPT0007135_14	1	Sgeranii	PGPT0006725_4572	1
BCCO_861	PGPT0005930_3124	1	Slacri	PGPT0008010_375	1	Sreticuliscabiei	PGPT0007215_848	1	Sturgidiscabies	PGPT0007135_843	1	Sgeranii	PGPT0006725_4656	1
BCCO_861	PGPT0005960_32	1	Slacri	PGPT0008010_470	1	Sreticuliscabiei	PGPT0007225_1006	1	Sturgidiscabies	PGPT0007140_867	1	Sgeranii	PGPT0006725_5316	1
BCCO_861	PGPT0005965_18	1	Slacri	PGPT0008065_10	1	Sreticuliscabiei	PGPT0007230_1400	1	Sturgidiscabies	PGPT0007145_314	1	Sgeranii	PGPT0006725_5450	1
BCCO_861	PGPT0005965_28	1	Slacri	PGPT0008075_3914	1	Sreticuliscabiei	PGPT0007235_799	1	Sturgidiscabies	PGPT0007145_40	1	Sgeranii	PGPT0006725_5631	1
BCCO_861	PGPT0006025_454	1	Slacri	PGPT0008090_1275	1	Sreticuliscabiei	PGPT0007240_98	1	Sturgidiscabies	PGPT0007155_333	1	Sgeranii	PGPT0006725_5793	1
BCCO_861	PGPT0006035_752	1	Slacri	PGPT0008090_3196	1	Sreticuliscabiei	PGPT0007245_2934	1	Sturgidiscabies	PGPT0007155_448	1	Sgeranii	PGPT0006725_5823	1
BCCO_861	PGPT0006035_777	1	Slacri	PGPT0008090_7318	1	Sreticuliscabiei	PGPT0007245_873	1	Sturgidiscabies	PGPT0007155_64	1	Sgeranii	PGPT0006725_5978	1
BCCO_861	PGPT0006045_611	1	Slacri	PGPT0008095_2076	1	Sreticuliscabiei	PGPT0007250_1019	1	Sturgidiscabies	PGPT0007155_7	1	Sgeranii	PGPT0006725_6216	1
BCCO_861	PGPT0006050_370	1	Slacri	PGPT0008110_3294	1	Sreticuliscabiei	PGPT0007250_1106	1	Sturgidiscabies	PGPT0007165_2	1	Sgeranii	PGPT0006725_684	1
BCCO_861	PGPT0006055_279	1	Slacri	PGPT0008125_2606	1	Sreticuliscabiei	PGPT0007255_59	1	Sturgidiscabies	PGPT0007165_2163	1	Sgeranii	PGPT0006725_8624	1
BCCO_861	PGPT0006060_562	1	Slacri	PGPT0008125_27	2	Sreticuliscabiei	PGPT0007260_1058	2	Sturgidiscabies	PGPT0007165_218	1	Sgeranii	PGPT0006725_89	1
BCCO_861	PGPT0006065_169	1	Slacri	PGPT0008125_40	1	Sreticuliscabiei	PGPT0007260_650	2	Sturgidiscabies	PGPT0007165_2377	1	Sgeranii	PGPT0006725_9000	1
BCCO_861	PGPT0006065_235	1	Slacri	PGPT0008125_4483	1	Sreticuliscabiei	PGPT0007265_1031	2	Sturgidiscabies	PGPT0007165_2856	1	Sgeranii	PGPT0006725_9677	1
BCCO_861	PGPT0006070_1105	1	Slacri	PGPT0008130_2214	1	Sreticuliscabiei	PGPT0007270_187	1	Sturgidiscabies	PGPT0007165_3211	1	Sgeranii	PGPT0006725_9711	1
BCCO_861	PGPT0006070_146	1	Slacri	PGPT0008130_3226	1	Sreticuliscabiei	PGPT0007275_1050	1	Sturgidiscabies	PGPT0007165_586	1	Sgeranii	PGPT0006725_986	1
BCCO_861	PGPT0006070_15	1	Slacri	PGPT0008135_2134	1	Sreticuliscabiei	PGPT0007275_578	2	Sturgidiscabies	PGPT0007176_1	2	Sgeranii	PGPT0006730_10145	1
BCCO_861	PGPT0006070_152	1	Slacri	PGPT0008145_271	1	Sreticuliscabiei	PGPT0007280_1	1	Sturgidiscabies	PGPT0007176_745	1	Sgeranii	PGPT0006730_10219	1
BCCO_861	PGPT0006070_1862	1	Slacri	PGPT0008145_5	1	Sreticuliscabiei	PGPT0007280_263	2	Sturgidiscabies	PGPT0007180_1031	1	Sgeranii	PGPT0006730_10905	1
BCCO_861	PGPT0006070_2302	1	Slacri	PGPT0008150_938	1	Sreticuliscabiei	PGPT0007280_345	1	Sturgidiscabies	PGPT0007180_672	1	Sgeranii	PGPT0006730_1176	1
BCCO_861	PGPT0006070_557	1	Slacri	PGPT0008155_1132	1	Sreticuliscabiei	PGPT0007280_721	1	Sturgidiscabies	PGPT0007210_3040	1	Sgeranii	PGPT0006730_12046	1
BCCO_861	PGPT0006070_563	1	Slacri	PGPT0008155_1185	1	Sreticuliscabiei	PGPT0007280_817	1	Sturgidiscabies	PGPT0007210_3525	1	Sgeranii	PGPT0006730_12619	1
BCCO_861	PGPT0006075_3683	1	Slacri	PGPT0008160_1368	1	Sreticuliscabiei	PGPT0007290_1024	1	Sturgidiscabies	PGPT0007215_657	1	Sgeranii	PGPT0006730_12987	1
BCCO_861	PGPT0006075_4742	1	Slacri	PGPT0008160_3712	1	Sreticuliscabiei	PGPT0007290_1348	3	Sturgidiscabies	PGPT0007215_848	1	Sgeranii	PGPT0006730_13071	1
BCCO_861	PGPT0006075_51	1	Slacri	PGPT0008170_1222	1	Sreticuliscabiei	PGPT0007290_514	1	Sturgidiscabies	PGPT0007225_1006	1	Sgeranii	PGPT0006730_13158	1
BCCO_861	PGPT0006075_731	1	Slacri	PGPT0008170_3	1	Sreticuliscabiei	PGPT0007295_1083	1	Sturgidiscabies	PGPT0007230_1400	1	Sgeranii	PGPT0006730_13304	1
BCCO_861	PGPT0006080_4	1	Slacri	PGPT0008170_533	1	Sreticuliscabiei	PGPT0007300_807	1	Sturgidiscabies	PGPT0007235_799	1	Sgeranii	PGPT0006730_13723	1
BCCO_861	PGPT0006090_29	1	Slacri	PGPT0008185_666	1	Sreticuliscabiei	PGPT0007325_1235	1	Sturgidiscabies	PGPT0007240_98	1	Sgeranii	PGPT0006730_1381	1
BCCO_861	PGPT0006090_415	2	Slacri	PGPT0008185_6888	1	Sreticuliscabiei	PGPT0007325_1352	1	Sturgidiscabies	PGPT0007245_2934	1	Sgeranii	PGPT0006730_14418	1
BCCO_861	PGPT0006090_481	1	Slacri	PGPT0008185_862	1	Sreticuliscabiei	PGPT0007325_1395	1	Sturgidiscabies	PGPT0007245_873	1	Sgeranii	PGPT0006730_15837	1
BCCO_861	PGPT0006090_635	1	Slacri	PGPT0008190_214	1	Sreticuliscabiei	PGPT0007330_376	1	Sturgidiscabies	PGPT0007250_1019	1	Sgeranii	PGPT0006730_15938	1
BCCO_861	PGPT0006090_788	1	Slacri	PGPT0008190_366	1	Sreticuliscabiei	PGPT0007360_1030	1	Sturgidiscabies	PGPT0007250_1106	1	Sgeranii	PGPT0006730_16694	1
BCCO_861	PGPT0006090_872	1	Slacri	PGPT0008190_480	1	Sreticuliscabiei	PGPT0007360_1281	1	Sturgidiscabies	PGPT0007255_59	1	Sgeranii	PGPT0006730_16735	1
BCCO_861	PGPT0006105_627	1	Slacri	PGPT0008190_49	1	Sreticuliscabiei	PGPT0007360_195	1	Sturgidiscabies	PGPT0007260_1058	1	Sgeranii	PGPT0006730_17501	1
BCCO_861	PGPT0006110_140	1	Slacri	PGPT0008190_593	1	Sreticuliscabiei	PGPT0007360_2288	1	Sturgidiscabies	PGPT0007260_650	2	Sgeranii	PGPT0006730_18167	1
BCCO_861	PGPT0006115_144	1	Slacri	PGPT0008190_604	1	Sreticuliscabiei	PGPT0007360_2591	1	Sturgidiscabies	PGPT0007265_1031	2	Sgeranii	PGPT0006730_20717	1
BCCO_861	PGPT0006115_3088	1	Slacri	PGPT0008190_638	1	Sreticuliscabiei	PGPT0007360_2856	1	Sturgidiscabies	PGPT0007270_187	1	Sgeranii	PGPT0006730_23199	1
BCCO_861	PGPT0006115_5487	1	Slacri	PGPT0008200_785	1	Sreticuliscabiei	PGPT0007360_2873	1	Sturgidiscabies	PGPT0007275_1050	1	Sgeranii	PGPT0006730_23946	1
BCCO_861	PGPT0006115_5670	1	Slacri	PGPT0008200_987	1	Sreticuliscabiei	PGPT0007360_2884	1	Sturgidiscabies	PGPT0007275_578	3	Sgeranii	PGPT0006730_24041	1
BCCO_861	PGPT0006115_6097	1	Slacri	PGPT0008205_1231	1	Sreticuliscabiei	PGPT0007375_1256	1	Sturgidiscabies	PGPT0007280_1	1	Sgeranii	PGPT0006730_9374	1
BCCO_861	PGPT0006115_6120	1	Slacri	PGPT0008220_500	1	Sreticuliscabiei	PGPT0007375_3	1	Sturgidiscabies	PGPT0007280_263	2	Sgeranii	PGPT0006730_9721	1
BCCO_861	PGPT0006115_6520	1	Slacri	PGPT0008225_422	1	Sreticuliscabiei	PGPT0007375_7	1	Sturgidiscabies	PGPT0007280_345	1	Sgeranii	PGPT0006730_9855	1
BCCO_861	PGPT0006115_814	2	Slacri	PGPT0008230_265	1	Sreticuliscabiei	PGPT0007375_847	1	Sturgidiscabies	PGPT0007280_392	1	Sgeranii	PGPT0006735_64	1
BCCO_861	PGPT0006150_37	2	Slacri	PGPT0008235_116	1	Sreticuliscabiei	PGPT0007385_93	1	Sturgidiscabies	PGPT0007280_721	1	Sgeranii	PGPT0006740_142	1
BCCO_861	PGPT0006170_276	1	Slacri	PGPT0008281_51	1	Sreticuliscabiei	PGPT0007455_123	1	Sturgidiscabies	PGPT0007280_817	1	Sgeranii	PGPT0006760_2049	1
BCCO_861	PGPT0006170_414	1	Slacri	PGPT0008285_1051	1	Sreticuliscabiei	PGPT0007475_212	1	Sturgidiscabies	PGPT0007290_1024	1	Sgeranii	PGPT0006760_3348	1
BCCO_861	PGPT0006170_650	1	Slacri	PGPT0008290_217	1	Sreticuliscabiei	PGPT0007495_6	1	Sturgidiscabies	PGPT0007290_1348	3	Sgeranii	PGPT0006760_3380	1
BCCO_861	PGPT0006195_35	1	Slacri	PGPT0008310_2734	1	Sreticuliscabiei	PGPT0007525_630	1	Sturgidiscabies	PGPT0007290_327	1	Sgeranii	PGPT0006760_407	1
BCCO_861	PGPT0006315_11	2	Slacri	PGPT0008310_928	1	Sreticuliscabiei	PGPT0007530_2188	1	Sturgidiscabies	PGPT0007290_514	1	Sgeranii	PGPT0006770_2803	1
BCCO_861	PGPT0006315_1318	2	Slacri	PGPT0008315_1251	1	Sreticuliscabiei	PGPT0007530_226	1	Sturgidiscabies	PGPT0007295_1083	1	Sgeranii	PGPT0006770_3263	1
BCCO_861	PGPT0006315_1356	1	Slacri	PGPT0008320_12110	1	Sreticuliscabiei	PGPT0007530_2460	1	Sturgidiscabies	PGPT0007300_807	1	Sgeranii	PGPT0006770_6454	1
BCCO_861	PGPT0006315_1886	1	Slacri	PGPT0008320_12650	1	Sreticuliscabiei	PGPT0007530_3308	1	Sturgidiscabies	PGPT0007325_1235	1	Sgeranii	PGPT0006775_1435	1
BCCO_861	PGPT0006315_660	1	Slacri	PGPT0008320_12736	1	Sreticuliscabiei	PGPT0007530_3323	1	Sturgidiscabies	PGPT0007325_1352	1	Sgeranii	PGPT0006775_2719	1
BCCO_861	PGPT0006315_704	1	Slacri	PGPT0008320_13034	1	Sreticuliscabiei	PGPT0007535_411	1	Sturgidiscabies	PGPT0007325_1395	1	Sgeranii	PGPT0006785_35	1
BCCO_861	PGPT0006355_340	1	Slacri	PGPT0008320_13271	1	Sreticuliscabiei	PGPT0007550_1124	1	Sturgidiscabies	PGPT0007330_376	1	Sgeranii	PGPT0006790_506	1
BCCO_861	PGPT0006355_3511	1	Slacri	PGPT0008320_13903	1	Sreticuliscabiei	PGPT0007550_1161	1	Sturgidiscabies	PGPT0007360_1030	1	Sgeranii	PGPT0006800_1327	1
BCCO_861	PGPT0006355_3885	1	Slacri	PGPT0008320_13968	1	Sreticuliscabiei	PGPT0007550_1338	1	Sturgidiscabies	PGPT0007360_1281	1	Sgeranii	PGPT0006800_1614	1
BCCO_861	PGPT0006365_1	2	Slacri	PGPT0008320_14020	1	Sreticuliscabiei	PGPT0007550_335	1	Sturgidiscabies	PGPT0007360_195	1	Sgeranii	PGPT0006800_4	2
BCCO_861	PGPT0006365_14	1	Slacri	PGPT0008320_2765	1	Sreticuliscabiei	PGPT0007550_513	1	Sturgidiscabies	PGPT0007360_2288	1	Sgeranii	PGPT0006800_789	1
BCCO_861	PGPT0006365_1928	1	Slacri	PGPT0008320_3458	1	Sreticuliscabiei	PGPT0007550_66	1	Sturgidiscabies	PGPT0007360_2591	1	Sgeranii	PGPT0006855_48	1
BCCO_861	PGPT0006365_1949	1	Slacri	PGPT0008320_5	1	Sreticuliscabiei	PGPT0007555_396	1	Sturgidiscabies	PGPT0007360_2856	1	Sgeranii	PGPT0006875_10039	1
BCCO_861	PGPT0006365_2174	1	Slacri	PGPT0008320_5021	1	Sreticuliscabiei	PGPT0007565_320	1	Sturgidiscabies	PGPT0007360_2873	1	Sgeranii	PGPT0006875_2589	1
BCCO_861	PGPT0006365_963	2	Slacri	PGPT0008320_5855	1	Sreticuliscabiei	PGPT0007570_562	1	Sturgidiscabies	PGPT0007360_2884	1	Sgeranii	PGPT0006875_397	4
BCCO_861	PGPT0006375_1232	1	Slacri	PGPT0008320_6195	1	Sreticuliscabiei	PGPT0007575_704	1	Sturgidiscabies	PGPT0007375_1256	1	Sgeranii	PGPT0006875_4188	1
BCCO_861	PGPT0006375_1293	1	Slacri	PGPT0008325_335	1	Sreticuliscabiei	PGPT0007580_1847	1	Sturgidiscabies	PGPT0007375_3	1	Sgeranii	PGPT0006875_43	1
BCCO_861	PGPT0006375_1339	2	Slacri	PGPT0008325_474	1	Sreticuliscabiei	PGPT0007580_1877	1	Sturgidiscabies	PGPT0007375_7	1	Sgeranii	PGPT0006875_4614	1
BCCO_861	PGPT0006375_602	1	Slacri	PGPT0008330_1087	1	Sreticuliscabiei	PGPT0007585_310	1	Sturgidiscabies	PGPT0007375_847	1	Sgeranii	PGPT0006875_4680	1
BCCO_861	PGPT0006375_908	1	Slacri	PGPT0008330_195	1	Sreticuliscabiei	PGPT0007590_534	1	Sturgidiscabies	PGPT0007385_93	1	Sgeranii	PGPT0006875_5847	1
BCCO_861	PGPT0006375_922	2	Slacri	PGPT0008345_307	1	Sreticuliscabiei	PGPT0007595_14	1	Sturgidiscabies	PGPT0007455_123	1	Sgeranii	PGPT0006875_6289	1
BCCO_861	PGPT0006470_3	1	Slacri	PGPT0008345_96	1	Sreticuliscabiei	PGPT0007595_759	1	Sturgidiscabies	PGPT0007475_212	1	Sgeranii	PGPT0006875_6844	1
BCCO_861	PGPT0006635_129	1	Slacri	PGPT0008350_216	1	Sreticuliscabiei	PGPT0007605_1267	1	Sturgidiscabies	PGPT0007495_6	1	Sgeranii	PGPT0006875_7388	1
BCCO_861	PGPT0006645_117	1	Slacri	PGPT0008350_2676	1	Sreticuliscabiei	PGPT0007605_19	1	Sturgidiscabies	PGPT0007525_630	1	Sgeranii	PGPT0006880_646	1
BCCO_861	PGPT0006645_260	1	Slacri	PGPT0008350_767	1	Sreticuliscabiei	PGPT0007615_15	1	Sturgidiscabies	PGPT0007530_2188	1	Sgeranii	PGPT0006885_1411	1
BCCO_861	PGPT0006645_990	1	Slacri	PGPT0008350_812	1	Sreticuliscabiei	PGPT0007615_29	1	Sturgidiscabies	PGPT0007530_2460	1	Sgeranii	PGPT0006950_189	1
BCCO_861	PGPT0006655_320	2	Slacri	PGPT0008355_1145	1	Sreticuliscabiei	PGPT0007615_74	1	Sturgidiscabies	PGPT0007530_3308	1	Sgeranii	PGPT0006995_111	1
BCCO_861	PGPT0006655_333	1	Slacri	PGPT0008355_1724	1	Sreticuliscabiei	PGPT0007615_743	1	Sturgidiscabies	PGPT0007530_3323	1	Sgeranii	PGPT0006995_90	1
BCCO_861	PGPT0006655_348	1	Slacri	PGPT0008355_2000	1	Sreticuliscabiei	PGPT0007625_59	1	Sturgidiscabies	PGPT0007535_411	1	Sgeranii	PGPT0007070_1294	1
BCCO_861	PGPT0006655_53	1	Slacri	PGPT0008355_2484	1	Sreticuliscabiei	PGPT0007630_1385	1	Sturgidiscabies	PGPT0007550_1124	1	Sgeranii	PGPT0007075_642	1
BCCO_861	PGPT0006655_83	1	Slacri	PGPT0008355_499	1	Sreticuliscabiei	PGPT0007637_161	1	Sturgidiscabies	PGPT0007550_1161	1	Sgeranii	PGPT0007080_1562	1
BCCO_861	PGPT0006660_18	1	Slacri	PGPT0008355_502	1	Sreticuliscabiei	PGPT0007637_2132	1	Sturgidiscabies	PGPT0007550_1338	1	Sgeranii	PGPT0007090_2	1
BCCO_861	PGPT0006665_206	1	Slacri	PGPT0008355_581	1	Sreticuliscabiei	PGPT0007637_722	1	Sturgidiscabies	PGPT0007550_335	1	Sgeranii	PGPT0007095_1	2
BCCO_861	PGPT0006670_204	1	Slacri	PGPT0008355_6879	1	Sreticuliscabiei	PGPT0007638_434	1	Sturgidiscabies	PGPT0007550_66	1	Sgeranii	PGPT0007095_3358	1
BCCO_861	PGPT0006680_212	1	Slacri	PGPT0008355_834	1	Sreticuliscabiei	PGPT0007641_1353	1	Sturgidiscabies	PGPT0007555_396	1	Sgeranii	PGPT0007105_154	2
BCCO_861	PGPT0006680_56	1	Slacri	PGPT0008355_978	1	Sreticuliscabiei	PGPT0007641_1385	1	Sturgidiscabies	PGPT0007580_1622	1	Sgeranii	PGPT0007120_3333	1
BCCO_861	PGPT0006685_546	1	Slacri	PGPT0008360_107	1	Sreticuliscabiei	PGPT0007660_734	1	Sturgidiscabies	PGPT0007580_1847	1	Sgeranii	PGPT0007120_4164	1
BCCO_861	PGPT0006690_325	1	Slacri	PGPT0008360_1587	1	Sreticuliscabiei	PGPT0007665_147	1	Sturgidiscabies	PGPT0007580_1877	1	Sgeranii	PGPT0007135_14	1
BCCO_861	PGPT0006690_72	1	Slacri	PGPT0008360_180	1	Sreticuliscabiei	PGPT0007665_68	1	Sturgidiscabies	PGPT0007585_310	1	Sgeranii	PGPT0007140_867	1
BCCO_861	PGPT0006700_136	1	Slacri	PGPT0008360_2194	1	Sreticuliscabiei	PGPT0007680_1202	1	Sturgidiscabies	PGPT0007590_534	1	Sgeranii	PGPT0007145_40	1
BCCO_861	PGPT0006700_388	1	Slacri	PGPT0008360_7490	1	Sreticuliscabiei	PGPT0007680_1917	1	Sturgidiscabies	PGPT0007595_14	1	Sgeranii	PGPT0007155_333	1
BCCO_861	PGPT0006700_598	1	Slacri	PGPT0008360_7522	1	Sreticuliscabiei	PGPT0007680_209	1	Sturgidiscabies	PGPT0007595_759	1	Sgeranii	PGPT0007155_357	1
BCCO_861	PGPT0006700_599	1	Slacri	PGPT0008360_7587	1	Sreticuliscabiei	PGPT0007680_5	1	Sturgidiscabies	PGPT0007605_1267	1	Sgeranii	PGPT0007155_378	1
BCCO_861	PGPT0006700_608	1	Slacri	PGPT0008360_8297	1	Sreticuliscabiei	PGPT0007680_7	2	Sturgidiscabies	PGPT0007605_19	1	Sgeranii	PGPT0007155_397	1
BCCO_861	PGPT0006700_94	1	Slacri	PGPT0008360_8375	1	Sreticuliscabiei	PGPT0007685_975	1	Sturgidiscabies	PGPT0007615_15	1	Sgeranii	PGPT0007155_448	1
BCCO_861	PGPT0006715_139	1	Slacri	PGPT0008360_8457	1	Sreticuliscabiei	PGPT0007695_678	1	Sturgidiscabies	PGPT0007615_29	1	Sgeranii	PGPT0007165_2	2
BCCO_861	PGPT0006715_214	1	Slacri	PGPT0008360_8659	1	Sreticuliscabiei	PGPT0007700_4337	1	Sturgidiscabies	PGPT0007615_74	1	Sgeranii	PGPT0007165_218	1
BCCO_861	PGPT0006715_219	1	Slacri	PGPT0008360_8666	1	Sreticuliscabiei	PGPT0007705_673	1	Sturgidiscabies	PGPT0007615_743	1	Sgeranii	PGPT0007165_2377	1
BCCO_861	PGPT0006715_32	1	Slacri	PGPT0008360_8741	1	Sreticuliscabiei	PGPT0007705_758	1	Sturgidiscabies	PGPT0007630_1385	1	Sgeranii	PGPT0007165_2856	1
BCCO_861	PGPT0006715_424	1	Slacri	PGPT0008365_3937	1	Sreticuliscabiei	PGPT0007725_4635	1	Sturgidiscabies	PGPT0007637_185	1	Sgeranii	PGPT0007165_523	1
BCCO_861	PGPT0006725_11109	1	Slacri	PGPT0008365_504	1	Sreticuliscabiei	PGPT0007735_1094	1	Sturgidiscabies	PGPT0007637_2132	1	Sgeranii	PGPT0007165_586	1
BCCO_861	PGPT0006725_11985	1	Slacri	PGPT0008370_3251	1	Sreticuliscabiei	PGPT0007740_179	1	Sturgidiscabies	PGPT0007637_722	1	Sgeranii	PGPT0007176_1	2
BCCO_861	PGPT0006725_12463	1	Slacri	PGPT0008370_3326	1	Sreticuliscabiei	PGPT0007740_268	1	Sturgidiscabies	PGPT0007638_434	1	Sgeranii	PGPT0007176_745	1
BCCO_861	PGPT0006725_13697	1	Slacri	PGPT0008375_39	1	Sreticuliscabiei	PGPT0007740_710	1	Sturgidiscabies	PGPT0007641_1353	1	Sgeranii	PGPT0007180_1031	1
BCCO_861	PGPT0006725_14072	1	Slacri	PGPT0008380_11187	1	Sreticuliscabiei	PGPT0007750_1557	1	Sturgidiscabies	PGPT0007641_1385	1	Sgeranii	PGPT0007180_135	1
BCCO_861	PGPT0006725_14519	1	Slacri	PGPT0008380_12259	1	Sreticuliscabiei	PGPT0007750_376	1	Sturgidiscabies	PGPT0007660_740	1	Sgeranii	PGPT0007180_930	1
BCCO_861	PGPT0006725_14818	1	Slacri	PGPT0008380_12538	1	Sreticuliscabiei	PGPT0007775_1266	1	Sturgidiscabies	PGPT0007665_147	1	Sgeranii	PGPT0007210_3040	1
BCCO_861	PGPT0006725_1522	1	Slacri	PGPT0008380_12938	1	Sreticuliscabiei	PGPT0007785_1166	1	Sturgidiscabies	PGPT0007665_68	1	Sgeranii	PGPT0007215_481	1
BCCO_861	PGPT0006725_16788	1	Slacri	PGPT0008380_13028	1	Sreticuliscabiei	PGPT0007785_122	1	Sturgidiscabies	PGPT0007680_1202	1	Sgeranii	PGPT0007215_657	1
BCCO_861	PGPT0006725_172	1	Slacri	PGPT0008380_13056	1	Sreticuliscabiei	PGPT0007790_1308	1	Sturgidiscabies	PGPT0007680_1917	1	Sgeranii	PGPT0007225_1007	1
BCCO_861	PGPT0006725_20450	1	Slacri	PGPT0008380_13194	1	Sreticuliscabiei	PGPT0007790_2054	1	Sturgidiscabies	PGPT0007680_209	1	Sgeranii	PGPT0007230_1414	1
BCCO_861	PGPT0006725_21026	1	Slacri	PGPT0008380_13451	1	Sreticuliscabiei	PGPT0007790_846	1	Sturgidiscabies	PGPT0007680_5	1	Sgeranii	PGPT0007230_4164	1
BCCO_861	PGPT0006725_21708	1	Slacri	PGPT0008380_13740	1	Sreticuliscabiei	PGPT0007825_252	1	Sturgidiscabies	PGPT0007680_7	1	Sgeranii	PGPT0007235_799	1
BCCO_861	PGPT0006725_21724	2	Slacri	PGPT0008380_15258	1	Sreticuliscabiei	PGPT0007830_1495	1	Sturgidiscabies	PGPT0007685_975	1	Sgeranii	PGPT0007240_98	1
BCCO_861	PGPT0006725_21897	1	Slacri	PGPT0008380_15265	1	Sreticuliscabiei	PGPT0007835_343	1	Sturgidiscabies	PGPT0007695_678	1	Sgeranii	PGPT0007245_857	1
BCCO_861	PGPT0006725_2275	1	Slacri	PGPT0008380_15964	1	Sreticuliscabiei	PGPT0007840_341	1	Sturgidiscabies	PGPT0007700_4337	1	Sgeranii	PGPT0007250_1019	1
BCCO_861	PGPT0006725_2349	1	Slacri	PGPT0008380_40	1	Sreticuliscabiei	PGPT0007845_1332	1	Sturgidiscabies	PGPT0007705_673	1	Sgeranii	PGPT0007250_1106	1
BCCO_861	PGPT0006725_23798	1	Slacri	PGPT0008380_4015	1	Sreticuliscabiei	PGPT0007850_1785	1	Sturgidiscabies	PGPT0007705_758	1	Sgeranii	PGPT0007260_1055	1
BCCO_861	PGPT0006725_28672	1	Slacri	PGPT0008380_4026	1	Sreticuliscabiei	PGPT0007855_660	1	Sturgidiscabies	PGPT0007725_4635	1	Sgeranii	PGPT0007265_1031	2
BCCO_861	PGPT0006725_29182	1	Slacri	PGPT0008380_4256	1	Sreticuliscabiei	PGPT0007860_2039	1	Sturgidiscabies	PGPT0007735_1094	1	Sgeranii	PGPT0007275_1050	1
BCCO_861	PGPT0006725_29267	1	Slacri	PGPT0008380_4479	1	Sreticuliscabiei	PGPT0007865_267	1	Sturgidiscabies	PGPT0007740_179	1	Sgeranii	PGPT0007280_1	1
BCCO_861	PGPT0006725_3313	1	Slacri	PGPT0008380_5397	1	Sreticuliscabiei	PGPT0007865_799	1	Sturgidiscabies	PGPT0007740_268	1	Sgeranii	PGPT0007280_384	1
BCCO_861	PGPT0006725_3507	1	Slacri	PGPT0008380_6433	1	Sreticuliscabiei	PGPT0007875_2997	1	Sturgidiscabies	PGPT0007740_710	1	Sgeranii	PGPT0007280_392	1
BCCO_861	PGPT0006725_361	1	Slacri	PGPT0008380_7611	1	Sreticuliscabiei	PGPT0007890_635	1	Sturgidiscabies	PGPT0007750_1557	1	Sgeranii	PGPT0007280_721	1
BCCO_861	PGPT0006725_368	1	Slacri	PGPT0008380_8927	1	Sreticuliscabiei	PGPT0007905_2497	1	Sturgidiscabies	PGPT0007750_376	1	Sgeranii	PGPT0007280_840	1
BCCO_861	PGPT0006725_4013	1	Slacri	PGPT0008385_131	1	Sreticuliscabiei	PGPT0007910_145	1	Sturgidiscabies	PGPT0007775_1266	1	Sgeranii	PGPT0007290_420	1
BCCO_861	PGPT0006725_4267	1	Slacri	PGPT0008385_137	1	Sreticuliscabiei	PGPT0007915_1395	1	Sturgidiscabies	PGPT0007785_1166	1	Sgeranii	PGPT0007295_1083	1
BCCO_861	PGPT0006725_4704	1	Slacri	PGPT0008385_145	1	Sreticuliscabiei	PGPT0007915_2295	1	Sturgidiscabies	PGPT0007785_122	1	Sgeranii	PGPT0007300_807	1
BCCO_861	PGPT0006725_5082	1	Slacri	PGPT0008385_2429	1	Sreticuliscabiei	PGPT0007915_2781	1	Sturgidiscabies	PGPT0007790_1308	1	Sgeranii	PGPT0007325_1257	1
BCCO_861	PGPT0006725_5316	1	Slacri	PGPT0008385_2516	1	Sreticuliscabiei	PGPT0007945_781	1	Sturgidiscabies	PGPT0007790_2054	1	Sgeranii	PGPT0007325_1352	1
BCCO_861	PGPT0006725_5450	1	Slacri	PGPT0008385_2720	1	Sreticuliscabiei	PGPT0007975_327	1	Sturgidiscabies	PGPT0007825_252	1	Sgeranii	PGPT0007325_1395	1
BCCO_861	PGPT0006725_553	1	Slacri	PGPT0008385_3371	1	Sreticuliscabiei	PGPT0007980_4	1	Sturgidiscabies	PGPT0007830_1495	1	Sgeranii	PGPT0007325_282	1
BCCO_861	PGPT0006725_6153	1	Slacri	PGPT0008385_3576	1	Sreticuliscabiei	PGPT0007985_963	1	Sturgidiscabies	PGPT0007835_343	1	Sgeranii	PGPT0007330_376	1
BCCO_861	PGPT0006725_6517	1	Slacri	PGPT0008385_4572	1	Sreticuliscabiei	PGPT0007990_324	1	Sturgidiscabies	PGPT0007840_341	1	Sgeranii	PGPT0007360_1281	1
BCCO_861	PGPT0006725_684	1	Slacri	PGPT0008385_4674	1	Sreticuliscabiei	PGPT0007990_4505	1	Sturgidiscabies	PGPT0007845_1332	1	Sgeranii	PGPT0007360_1900	1
BCCO_861	PGPT0006725_8500	1	Slacri	PGPT0008385_4748	1	Sreticuliscabiei	PGPT0007990_781	1	Sturgidiscabies	PGPT0007850_1785	1	Sgeranii	PGPT0007360_195	1
BCCO_861	PGPT0006725_8624	1	Slacri	PGPT0008385_7278	1	Sreticuliscabiei	PGPT0008000_509	1	Sturgidiscabies	PGPT0007855_660	1	Sgeranii	PGPT0007360_2288	1
BCCO_861	PGPT0006725_89	1	Slacri	PGPT0008385_786	1	Sreticuliscabiei	PGPT0008005_2302	1	Sturgidiscabies	PGPT0007860_2039	1	Sgeranii	PGPT0007360_2310	1
BCCO_861	PGPT0006725_8918	1	Slacri	PGPT0008385_8672	1	Sreticuliscabiei	PGPT0008010_167	1	Sturgidiscabies	PGPT0007865_267	1	Sgeranii	PGPT0007360_253	1
BCCO_861	PGPT0006725_9000	1	Slacri	PGPT0008385_8734	1	Sreticuliscabiei	PGPT0008010_18	1	Sturgidiscabies	PGPT0007865_799	1	Sgeranii	PGPT0007360_2856	1
BCCO_861	PGPT0006730_10523	1	Slacri	PGPT0008385_8774	1	Sreticuliscabiei	PGPT0008010_375	1	Sturgidiscabies	PGPT0007875_2997	1	Sgeranii	PGPT0007360_2873	1
BCCO_861	PGPT0006730_10754	1	Slacri	PGPT0008385_8776	1	Sreticuliscabiei	PGPT0008010_384	1	Sturgidiscabies	PGPT0007885_110	1	Sgeranii	PGPT0007360_2884	1
BCCO_861	PGPT0006730_10833	1	Slacri	PGPT0008385_8790	1	Sreticuliscabiei	PGPT0008010_470	1	Sturgidiscabies	PGPT0007890_635	1	Sgeranii	PGPT0007360_936	1
BCCO_861	PGPT0006730_11722	1	Slacri	PGPT0008385_8809	1	Sreticuliscabiei	PGPT0008015_815	1	Sturgidiscabies	PGPT0007905_2497	1	Sgeranii	PGPT0007360_960	1
BCCO_861	PGPT0006730_11738	1	Slacri	PGPT0008385_8892	1	Sreticuliscabiei	PGPT0008065_10	1	Sturgidiscabies	PGPT0007910_145	1	Sgeranii	PGPT0007375_1256	1
BCCO_861	PGPT0006730_12714	1	Slacri	PGPT0008385_8913	1	Sreticuliscabiei	PGPT0008075_3059	1	Sturgidiscabies	PGPT0007915_1087	1	Sgeranii	PGPT0007375_2	1
BCCO_861	PGPT0006730_12888	1	Slacri	PGPT0008405_2485	1	Sreticuliscabiei	PGPT0008075_4919	1	Sturgidiscabies	PGPT0007915_1395	1	Sgeranii	PGPT0007375_7	1
BCCO_861	PGPT0006730_12987	1	Slacri	PGPT0008410_2928	1	Sreticuliscabiei	PGPT0008075_68	1	Sturgidiscabies	PGPT0007915_2295	1	Sgeranii	PGPT0007375_855	1
BCCO_861	PGPT0006730_13071	1	Slacri	PGPT0008410_46	2	Sreticuliscabiei	PGPT0008090_1275	1	Sturgidiscabies	PGPT0007915_2781	1	Sgeranii	PGPT0007440_179	1
BCCO_861	PGPT0006730_13158	1	Slacri	PGPT0008415_190	1	Sreticuliscabiei	PGPT0008090_4785	1	Sturgidiscabies	PGPT0007945_781	1	Sgeranii	PGPT0007455_123	1
[truncated: 3,516 more rows]

[truncated: 1 more sheets: Table S10]
